# Supplementary material
Source: publisher figshare collection journal article supplement (https://springernature.figshare.com/ndownloader/files/37395037)
Supplement: Supplementary file 1 [file 37395037]

## Sheet: SPI_index_labelled
country	iso3c	date	SPI.INDEX.PIL1	SPI.INDEX.PIL2	SPI.INDEX.PIL3	SPI.INDEX.PIL4	SPI.INDEX.PIL5	SPI.INDEX	SPI.DIM1.5.INDEX	SPI.DIM2.1.INDEX	SPI.DIM2.2.INDEX	SPI.DIM2.4.INDEX	SPI.DIM3.1.INDEX	SPI.DIM3.2.INDEX	SPI.DIM3.3.INDEX	SPI.DIM3.4.INDEX	SPI.DIM4.1.CEN.INDEX	SPI.DIM4.1.SVY.INDEX	SPI.DIM4.2.INDEX	SPI.DIM4.3.INDEX	SPI.DIM5.1.INDEX	SPI.DIM5.2.INDEX	SPI.DIM5.5.INDEX	SPI.D1.5.POV	SPI.D1.5.CHLD.MORT	SPI.D1.5.DT.TDS.DPPF.XP.ZS	SPI.D1.5.SAFE.MAN.WATER	SPI.D1.5.LFP	SPI.D2.1.GDDS	SPI.D2.2.Machine.readable	SPI.D2.2.Non.proprietary	SPI.D2.2.Download.options	SPI.D2.2.Metadata.available	SPI.D2.2.Terms.of.use	SPI.D2.2.Openness.subscore	SPI.D2.4.NADA	SPI.D3.1.POV	SPI.D3.2.HNGR	SPI.D3.3.HLTH	SPI.D3.4.EDUC	SPI.D3.5.GEND	SPI.D3.6.WTRS	SPI.D3.7.ENRG	SPI.D3.8.WORK	SPI.D3.9.INDY	SPI.D3.10.NEQL	SPI.D3.11.CITY	SPI.D3.12.CNSP	SPI.D3.15.LAND
			Pillar 1 - Data Use - Score	Pillar 2 - Data Services - Score	Pillar 3 - Data Products - Score	Pillar 4 - Data Sources - Score	Pillar 5 - Data Infrastructure - Score	SPI Overall Score	Dimension 1.5: Data use by international organizations	Dimension 2.1: Data Releases	Dimension 2.2: Online access	Dimension 2.4: Data services	Dimension 3.1: Social Statistics	Dimension 3.2: Economic Statistics	Dimension 3.3: Environmental Statistics	Dimension 3.4: Institutional Statistics	Dimension 4.1: Censuses	Dimension 4.1: Surveys	Dimension 4.2: Administrative Data	Dimension 4.3: Geospatial Data	Dimension 5.1: Legislation and governance	Dimension 5.2: Standards and Methods	Dimension 5.5: Finance	Dimension 1.5: Data use by international organisations - Availability of Comparable Poverty headcount ratio at $1.90 a day	Dimension 1.5: Data use by international organisations - Availability of Mortality rate, under-5 (per 1,000 live births) data meeting quality standards according to UN IGME	Dimension 1.5: Data use by international organisations - Quality of Debt service data according to World Bank	Dimension 1.5: Data use by international organisations - Safely Managed Drinking Water	Dimension 1.5: Data use by international organisations - Labor force participation rate by sex and age (%)	Dimension 2.1: Data releases - SDDS/e-GDDS subscription	Dimension 2.2: Online access - Machine Readability Score	Dimension 2.2: Online access - Non-Proprietary format Score	Dimension 2.2: Online access - Download Options Score	Dimension 2.2: Online access - Metadata Available Score	Dimension 2.2: Online access - Terms of Use Score	Dimension 2.2: Online access - ODIN Open Data Openness score	Dimension 2.4: Data access services - NADA metadata	Dimension 3.1: SDG Goal 1 - GOAL 1: No Poverty	Dimension 3.2: SDG Goal 2 - GOAL 2: Zero Hunger	Dimension 3.3: SDG Goal 3 - GOAL 3: Good Health and Well-being	Dimension 3.4: SDG Goal 4 - GOAL 4: Quality Education	Dimension 3.5: SDG Goal 5 - GOAL 5: Gender Equality	Dimension 3.6: SDG Goal 6 - GOAL 6: Clean Water and Sanitation	Dimension 3.7: SDG Goal 7 - GOAL 7: Affordable and Clean Energy	Dimension 3.8: SDG Goal 8 - GOAL 8: Decent Work and Economic Growth	Dimension 3.9: SDG Goal 9 - GOAL 9: Industry, Innovation and Infrastructure	Dimension 3.10: SDG Goal 10 - GOAL 10: Reduced Inequality	Dimension 3.11: SDG Goal 11 - GOAL 11: Sustainable Cities and Communities	Dimension 3.12: SDG Goal 12 - GOAL 12: Responsible Consumption and Production	Dimension 3.15: SDG Goal 15 - GOAL 15: Life on Land
Norway	NOR	2020	100	94.3	79.1	78.9417	100	90.4683	1	1	0.829	1	0.754333	0.799333	1	0.667	0.666667	1	1	0.491	1	1	1	1	1	1	1	1	1	0.983	1	0.81	0.85	0.5	0.829	1	1	0.7	0.857	0.636	0.5	0.833	0.8	0.643	0.889	0.714	1	0.75	1
Finland	FIN	2020	100	95.7	79.2375	75.6667	100	90.1208	1	1	0.871	1	0.7645	0.783667	1	0.6945	0.666667	0.8	1	0.56	1	1	1	1	1	1	1	1	1	0.933	0.967	0.686	0.852	0.919	0.871	1	1	0.636	0.857	0.636	0.625	0.833	0.8	0.692	0.889	0.714	0.857	0.75	1
Austria	AUT	2020	100	92.0333	79.4125	77.45	100	89.7792	1	1	0.761	1	0.756333	0.7965	1	0.6945	1	0.866	1	0.232	1	1	1	1	1	1	1	1	1	0.967	0.967	0.619	0.793	0.46	0.761	1	1	0.636	0.857	0.545	0.5	1	0.8	0.769	0.889	0.714	0.857	0.75	1
Italy	ITA	2020	100	92.1667	77.7	78.25	100	89.6233	1	1	0.765	1	0.719833	0.7965	1	0.667	1	0.868	1	0.262	1	1	1	1	1	1	1	1	1	0.91	0.719	0.64	0.671	0.886	0.765	1	0.857	0.636	0.857	0.636	0.5	0.833	0.8	0.769	0.889	0.857	0.714	0.75	1
Sweden	SWE	2020	100	96.4333	78.8438	72.6667	100	89.5888	1	1	0.893	1	0.735833	0.820333	1	0.639	0.666667	0.8	1	0.44	1	1	1	1	1	1	1	1	1	0.95	0.933	0.85	0.867	0.867	0.893	1	1	0.727	0.81	0.545	0.5	0.833	0.8	0.769	0.889	0.714	1	0.75	1
United States	USA	2020	100	92.7	70.025	85.1	100	89.565	1	1	0.781	1	0.692333	0.619333	1	0.667	1	1	1	0.404	1	1	1	1	1	1	1	1	1	0.883	0.933	0.717	0.555	0.819	0.781	1	0.857	0.818	0.857	0.455	0.5	0.667	0.8	0.571	0.667	0.714	0.714	0.25	1
Poland	POL	2020	100	96.2667	71.7438	78.1917	100	89.2404	1	1	0.888	1	0.696	0.726333	0.75	0.7225	0.666667	0.868	1	0.593	1	1	1	1	1	1	1	1	1	1	1	0.726	0.712	1	0.888	1	0.714	0.636	0.857	0.636	0.5	0.833	0.8	0.538	0.889	0.714	0.667	0.75	1
Slovenia	SVN	2020	100	95.9	78.9938	70.6917	100	89.1171	1	1	0.877	1	0.735833	0.7965	1	0.7225	0.666667	0.8	1	0.361	1	1	1	1	1	1	1	1	1	0.95	0.983	0.705	0.814	0.933	0.877	1	1	0.636	0.81	0.636	0.5	0.833	0.8	0.769	0.889	0.571	1	0.75	1
Ireland	IRL	2020	100	96.8	74.9313	71.7917	100	88.7046	1	1	0.904	1	0.704833	0.747	1	0.639	0.666667	0.934	1	0.271	1	1	1	1	1	1	1	1	1	0.967	0.967	0.9	0.721	0.967	0.904	1	0.857	0.727	0.857	0.455	0.5	0.833	0.8	0.615	0.889	0.714	0.714	0.75	1
Netherlands	NLD	2020	100	97.1	73.8937	71.9417	100	88.5871	1	1	0.913	1	0.752	0.7855	0.6875	0.6115	0.666667	0.8	1	0.411	1	1	1	1	1	1	1	1	1	0.933	0.933	0.833	0.933	0.933	0.913	1	0.714	0.727	0.81	0.636	0.625	1	0.8	0.846	0.889	0.857	0.571	0.75	0.875
Japan	JPN	2020	100	89.8333	76.825	80.475	95	88.4267	1	1	0.695	1	0.701833	0.772667	1	0.7225	1	0.8	1	0.419	1	0.95	1	1	1	1	1	1	1	1	0.56	0.445	0.517	0.952	0.695	1	0.714	0.818	0.857	0.364	0.625	0.833	0.8	0.769	0.889	0.714	0.714	0.75	1
Korea, Rep.	KOR	2020	100	92.8333	79.1312	83.875	85	88.1679	1	1	0.785	1	0.755833	0.826667	1	0.583	1	1	1	0.355	1	0.85	1	1	1	1	1	1	1	0.883	0.9	0.793	0.45	0.9	0.785	1	0.857	0.818	0.857	0.545	0.625	0.833	1	0.643	0.889	0.714	0.714	1	1
Mexico	MEX	2020	100	93.3333	87.3438	84.3083	75	87.9971	1	1	0.8	1	0.927333	0.827667	1	0.7225	0.833333	0.934	1	0.605	1	0.75	1	1	1	1	1	1	1	0.933	0.9	0.669	0.638	0.862	0.8	1	1	1	0.905	0.909	0.75	1	1	0.923	0.889	0.571	0.833	0.75	1
Switzerland	CHE	2020	100	90.4333	79.075	80.1083	90	87.9233	1	1	0.713	1	0.760167	0.783667	1	0.6945	0.833333	0.934	1	0.437	1	0.9	1	1	1	1	1	1	1	0.983	1	0.583	1	0	0.713	1	0.857	0.8	0.81	0.636	0.625	0.833	0.8	0.692	0.889	0.714	0.857	0.75	1
Czech Republic	CZE	2020	100	89.6	77.1188	76.0917	95	87.5621	1	1	0.688	1	0.673	0.809333	1	0.7225	0.666667	0.868	1	0.509	1	0.95	1	1	1	1	1	1	1	0.933	0.983	0.455	0.567	0.5	0.688	1	1	0.636	0.857	0.545	0.5	0.5	0.8	0.846	0.889	0.714	0.857	0.75	1
Germany	DEU	2020	100	95.3333	71.6312	75.4167	95	87.4762	1	1	0.86	1	0.696833	0.731833	0.75	0.6945	0.666667	0.934	1	0.416	1	0.95	1	1	1	1	1	1	1	1	1	0.802	0.524	0.976	0.86	1	0.571	0.909	0.857	0.636	0.375	0.833	0.8	0.571	0.889	0.714	0.667	0.75	1
Canada	CAN	2020	100	93.0667	67.1	82.0167	95	87.4367	1	1	0.792	1	0.6295	0.669	0.75	0.7225	0.666667	1	1	0.614	1	0.95	1	1	1	1	1	1	1	0.9	1	0.783	0.81	0.467	0.792	1	0.714	0.8	0.857	0.364	0.375	0.667	0.8	0.615	0.778	0.571	0.5	0.75	1
France	FRA	2020	100	88.7667	78.375	68.9417	100	87.2167	1	1	0.663	1	0.758833	0.7755	1	0.667	0.666667	0.868	1	0.223	1	1	1	1	1	1	1	1	1	0.71	0.598	0.471	0.702	0.833	0.663	1	1	0.727	0.857	0.636	0.5	0.833	0.8	0.643	0.889	0.714	0.857	0.75	1
Denmark	DNK	2020	90	97.6667	70.0125	77.9167	100	87.1192	0.9	1	0.93	1	0.687333	0.728167	0.6875	0.667	0.666667	0.866	1	0.584	1	1	1	1	1	1	0.5	1	1	0.967	0.967	0.786	0.967	0.967	0.93	1	0.571	0.727	0.857	0.636	0.5	0.833	0.8	0.692	0.889	0.571	0.667	0.75	0.875
Spain	ESP	2020	100	91.2333	73.1937	69.425	100	86.7704	1	1	0.737	1	0.711167	0.777667	0.75	0.639	0.5	0.934	1	0.343	1	1	1	1	1	1	1	1	1	0.85	1	0.59	0.745	0.5	0.737	1	0.714	0.636	0.857	0.727	0.5	0.833	0.8	0.846	0.889	0.714	0.667	0.75	1
Georgia	GEO	2020	100	91.2333	85.4313	70.8167	85	86.4963	1	1	0.737	1	0.880333	0.786667	1	0.8335	0.666667	0.934	1	0.232	1	0.85	-99	1	1	1	1	1	1	0.767	0.886	0.645	0.579	0.807	0.737	1	1	0.9	0.905	0.727	0.75	1	1	0.692	0.778	0.667	0.833	0.75	1
Lithuania	LTU	2020	100	92.3333	70.5563	69.1917	100	86.4163	1	1	0.77	1	0.7295	0.712167	0.625	0.6945	0.666667	0.8	1	0.301	1	1	1	1	1	1	1	1	1	1	1	0.802	1	0.048	0.77	1	0.714	0.636	0.857	0.545	0.625	1	0.8	0.692	0.889	0.571	0.571	0.75	0.75
Slovak Republic	SVK	2020	90	96.1667	72.2938	71.1917	100	85.9304	0.9	1	0.885	1	0.696	0.741	0.75	0.7225	0.666667	0.868	1	0.313	1	1	1	1	1	1	0.5	1	1	1	1	0.867	0.574	0.983	0.885	1	0.714	0.636	0.857	0.636	0.5	0.833	0.8	0.769	0.889	0.667	0.571	0.75	1
Hungary	HUN	2020	100	89.0333	67.3937	72.3917	100	85.7638	1	1	0.671	1	0.6915	0.726	0.4445	0.6945	0.666667	0.868	1	0.361	1	1	1	1	1	1	1	1	1	0.95	0.902	0.621	0.86	0.024	0.671	1	0.429	0.636	0.857	0.727	0.5	1	0.8	0.846	0.889	0.571	0.5	0.75	0.889
Australia	AUS	2020	90	89.7667	74.9062	73.9667	100	85.7279	0.9	1	0.693	1	0.72	0.703333	1	0.7225	0.666667	1	1	0.292	1	1	1	1	1	1	0.5	1	1	0.9	0.35	0.481	0.802	0.933	0.693	1	0.857	0.818	0.857	0.455	0.5	0.833	0.8	0.714	0.778	0.714	0.714	0.5	1
Portugal	PRT	2020	100	91.9	73.6312	62.7	100	85.6462	1	1	0.757	1	0.726333	0.764833	0.75	0.667	0.5	0.8	1	0.208	1	1	1	1	1	1	1	1	1	0.9	0.805	0.729	0.852	0.498	0.757	1	0.714	0.818	0.857	0.636	0.5	0.833	0.8	0.769	0.889	0.714	0.667	0.75	1
Greece	GRC	2020	100	88.2	67.1437	71.9	100	85.4488	1	1	0.646	1	0.657	0.726	0.5	0.7225	0.5	1	1	0.376	1	1	1	1	1	1	1	1	1	0.66	0.607	0.319	0.69	0.952	0.646	1	0.571	0.636	0.857	0.545	0.5	0.833	0.8	0.846	0.889	0.571	0.5	0.75	1
Turkey	TUR	2020	100	85.5667	82.8375	58.1583	100	85.3125	1	1	0.567	1	0.783	0.851833	1	0.7225	0.333333	0.866	1	0.127	1	1	1	1	1	1	1	1	1	0.869	0.148	0.426	0.571	0.821	0.567	1	1	0.818	0.952	0.636	0.625	0.667	1	0.615	0.889	0.857	1	0.75	1
Estonia	EST	2020	90	91.8333	70.6063	70.2917	100	84.5463	0.9	1	0.755	1	0.719833	0.723167	0.625	0.6945	0.666667	0.934	1	0.211	1	1	1	1	1	1	0.5	1	1	0.967	0.967	0.876	0.967	0	0.755	1	0.857	0.636	0.857	0.636	0.5	0.833	0.8	0.615	0.889	0.571	0.714	0.75	0.75
Romania	ROU	2020	100	91.0667	69.2812	71.9417	90	84.4579	1	1	0.732	1	0.655333	0.664333	0.889	0.6945	0.666667	0.868	1	0.343	1	0.9	1	1	1	1	1	1	1	0.867	0.867	0.767	0.729	0.433	0.732	1	1	0.5	0.81	0.455	0.5	0.667	0.8	0.615	0.667	0.571	0.833	0.5	0.778
Luxembourg	LUX	2020	100	93.6333	64.95	60.9417	100	83.905	1	1	0.809	1	0.649167	0.712333	0.4445	0.667	0.666667	0.666	1	0.105	1	1	1	1	1	1	1	1	1	0.833	0.9	0.793	0.619	0.9	0.809	1	0.571	0.636	0.81	0.545	0.5	0.833	0.8	0.692	0.889	0.714	0.429	0.75	0.889
Latvia	LVA	2020	100	87.8667	64.8375	65.9917	100	83.7392	1	1	0.636	1	0.7025	0.6885	0.375	0.639	0.666667	0.868	1	0.105	1	1	1	1	1	1	1	1	1	0.821	0.838	0.764	0.755	0	0.636	1	0.571	0.727	0.857	0.727	0.5	0.833	0.8	0.692	0.889	0.571	0.429	0.75	0.75
United Kingdom	GBR	2020	100	87.3333	76.125	64.2917	90	83.55	1	1	0.62	1	0.748	0.7635	1	0.5555	0.666667	0.8	1	0.105	1	0.9	1	1	1	1	1	1	1	0.786	0.448	0.393	0.686	0.786	0.62	1	0.857	0.818	0.81	0.545	0.625	0.833	0.8	0.714	0.889	0.714	0.714	0.75	1
New Zealand	NZL	2020	100	93.6333	71.4313	66.6417	85	83.3413	1	1	0.809	1	0.664167	0.675833	1	0.6945	0.666667	0.8	1	0.199	1	0.85	1	1	1	1	1	1	1	0.917	0.95	0.71	0.567	0.9	0.809	1	0.714	0.8	0.857	0.364	0.25	1	0.8	0.692	0.778	0.571	0.714	0.5	1
Costa Rica	CRI	2020	100	87.0333	86.3812	73.2167	70	83.3263	1	1	0.611	1	0.867333	0.852833	1	0.75	0.666667	1	1	0.262	1	0.7	1	1	1	1	1	1	1	0.869	0.812	0.271	0.467	0.638	0.611	1	1	0.9	0.952	0.727	0.625	1	1	0.923	0.778	0.833	0.833	0.75	1
Iceland	ISL	2020	100	86.5667	67.25	62.5417	100	83.2717	1	1	0.597	1	0.626833	0.675667	0.75	0.7225	0.666667	0.8	1	0.035	1	1	1	1	1	1	1	1	1	0.852	0.852	0.836	0.443	0	0.597	1	0.571	0.636	0.857	0.364	0.5	0.833	0.8	0.615	0.889	0.571	0.429	0.75	1
Bulgaria	BGR	2020	100	91.0667	63.5312	70.6667	90	83.0529	1	1	0.732	1	0.610167	0.574667	0.889	0.639	0.666667	0.868	1	0.292	1	0.9	1	1	1	1	1	1	1	0.883	0.812	0.738	0.745	0.483	0.732	1	0.857	0.545	0.762	0.455	0.375	0.667	0.6	0.538	0.667	0.429	0.714	0.5	0.778
Albania	ALB	2020	100	68.6333	78.2625	73.025	95	82.9842	1	0.5	0.559	1	0.852333	0.642	1	0.778	1	0.734	1	0.187	1	0.95	0	1	1	1	1	1	0.5	0.748	0.888	0.707	0.452	0	0.559	1	0.857	0.909	0.905	0.818	0.625	1	0.8	0.615	0.556	0.667	0.714	0.5	1
Armenia	ARM	2020	100	84.9	83.9	60.8917	85	82.9383	1	1	0.547	1	0.845167	0.781	1	0.8335	0.666667	0.6	1	0.169	1	0.85	1	1	1	1	1	1	1	0.66	0.881	0.548	0.645	0	0.547	1	1	0.9	0.952	0.636	0.75	0.833	1	0.769	0.667	0.667	0.833	0.75	1
Chile	CHL	2020	100	77.6667	80.7438	59.8	95	82.6421	1	1	0.33	1	0.786667	0.838667	1	0.5835	0.5	0.6	1	0.292	1	0.95	1	1	1	1	1	1	1	0.279	0.743	0.221	0.405	0	0.33	1	1	0.818	0.857	0.545	0.5	1	1	0.846	0.889	0.714	0.833	0.75	1
Moldova	MDA	2020	100	95.3333	63.4312	62.5417	90	82.2613	1	1	0.86	1	0.6465	0.628333	0.5	0.75	0.666667	0.666	1	0.169	1	0.9	0	1	1	1	1	1	1	0.95	0.967	0.738	0.729	0.919	0.86	1	0.429	0.667	0.905	0.545	0.5	0.833	0.8	0.692	0.778	0.667	0.333	0.5	1
Cyprus	CYP	2020	100	91.3667	59.95	73.4583	85	81.955	1	1	0.741	1	0.583333	0.607833	0.639	0.5835	0.833333	1	1	0.105	1	0.85	1	1	1	1	1	1	1	0.9	0.771	0.5	0.533	1	0.741	1	0.571	0.545	0.762	0.455	0.5	0.667	0.8	0.538	0.667	0.571	0.571	0.5	0.778
Belgium	BEL	2020	100	82.2	66.175	66.3667	95	81.9483	1	1	0.466	1	0.6715	0.704167	0.5	0.667	0.666667	0.8	1	0.188	1	0.95	1	1	1	1	1	1	1	0.65	0.583	0.476	0.333	0.286	0.466	1	0.571	0.727	0.762	0.636	0.5	0.833	0.8	0.643	0.889	0.714	0.429	0.75	1
Mongolia	MNG	2020	100	96.9	84.7812	67.5917	60	81.8546	1	1	0.907	1	0.894	0.765	1	0.8055	0.666667	0.6	1	0.437	1	0.6	1	1	1	1	1	1	1	1	1	0.867	0.736	0.933	0.907	1	0.857	0.909	0.905	0.818	0.875	1	1	0.769	0.667	0.571	0.833	0.75	1
Belarus	BLR	2020	100	85.3	71.7562	54.5083	95	81.3129	1	1	0.559	1	0.753833	0.671167	0.6875	0.778	0.333333	0.534	1	0.313	1	0.95	1	1	1	1	1	1	1	0.762	0.943	0.483	0.607	0	0.559	1	0.714	0.6	0.857	0.727	0.625	1	0.8	0.643	0.667	0.667	0.5	0.75	0.875
Singapore	SGP	2020	100	99.6667	54.7938	71.5583	80	81.2037	1	1	0.99	1	0.5125	0.640667	0.3125	0.6115	0.333333	0.734	1	0.795	1	0.8	1	1	1	1	1	1	1	1	1	0.983	0.967	1	0.99	1	0.143	0.375	0.81	0.455	0.625	0.667	1	0.462	0.667	0.429	0.286	1	0.625
Serbia	SRB	2020	100	72.8	81.2938	71.8667	80	81.1921	1	0.5	0.684	1	0.866667	0.7085	1	0.778	0.666667	0.866	1	0.342	1	0.8	1	1	1	1	1	1	0.5	0.75	0.871	0.719	0.645	0.436	0.684	1	1	0.909	0.905	0.636	0.75	1	0.8	0.769	0.778	0.571	0.833	0.5	1
Kazakhstan	KAZ	2020	100	88.3333	81.2	65.525	70	81.0117	1	1	0.65	1	0.808	0.7925	1	0.6945	0.5	0.6	1	0.521	1	0.7	1	1	1	1	1	1	1	0.917	0.886	0.507	0.483	0.46	0.65	1	1	0.667	0.905	0.818	0.625	0.833	1	0.692	0.778	0.571	0.714	1	1
Kyrgyz Republic	KGZ	2020	100	81.5667	83.775	53.0333	85	80.675	1	1	0.447	1	0.8825	0.768167	1	0.75	0.333333	0.466	1	0.322	0	0.85	1	1	1	1	1	1	1	0.531	0.483	0.369	0.4	0.45	0.447	1	1	0.9	0.952	0.818	0.625	1	1	0.692	0.667	0.667	0.833	0.75	1
Russian Federation	RUS	2020	93.4	85.8333	66.6	65.1417	90	80.195	0.934	1	0.575	1	0.594667	0.681167	0.889	0.6115	0.666667	0.668	1	0.271	1	0.9	1	1	1	0.67	1	1	1	0.645	0.736	0.46	0.621	0.414	0.575	1	0.857	0.5	0.714	0.455	0.375	0.667	0.8	0.692	0.667	0.714	0.714	0.5	0.778
Philippines	PHL	2020	100	93.7667	78.4688	85.175	40	79.4821	1	1	0.813	1	0.826833	0.682333	1	0.75	1	1	1	0.407	1	0.4	-99	1	1	1	1	1	1	0.967	0.976	0.524	0.598	1	0.813	1	0.714	0.909	0.952	0.636	0.75	1	1	0.692	0.556	0.429	0.667	0.75	1
Thailand	THA	2020	100	79.6	82.7625	58.975	75	79.2675	1	1	0.388	1	0.8475	0.766833	1	0.778	1	0.732	0.5	0.127	1	0.75	1	1	1	1	1	1	1	0.321	0.976	0.19	0.45	0	0.388	1	0.857	1	0.952	0.818	0.625	0.833	1	0.692	0.778	0.714	0.667	0.75	1
Israel	ISR	2020	100	86.8	64.4562	47.7333	95	78.7979	1	1	0.604	1	0.57	0.722833	0.639	0.639	0.333333	0.534	1	0.042	1	0.95	1	1	1	1	1	1	1	0.867	0.852	0.357	0.517	0.426	0.604	1	0.571	0.556	0.762	0.364	0.5	0.667	0.8	0.692	0.667	0.857	0.571	0.75	0.778
Brazil	BRA	2020	90	87	74.1125	70.575	70	78.3375	0.9	1	0.61	1	0.78	0.733333	0.75	0.639	0.5	0.934	1	0.389	1	0.7	-99	1	1	1	1	0.5	1	0.926	0.96	0.54	0.605	0.017	0.61	1	0.714	0.8	0.905	0.636	0.625	1	1	0.769	0.667	0.714	0.5	0.75	1
Malta	MLT	2020	100	83.0333	53.3125	74.4667	80	78.1625	1	1	0.491	1	0.531333	0.573167	0.3125	0.639	0.666667	0.868	1	0.444	1	0.8	-99	1	1	1	1	1	1	0.486	0.595	0.35	0.364	0.662	0.491	1	0.429	0.5	0.762	0.455	0.375	0.667	0.8	0.615	0.667	0.571	0.286	0.5	0.625
North Macedonia	MKD	2020	100	87.8667	65.5687	65.175	70	77.7221	1	1	0.636	1	0.721167	0.592167	0.5	0.8055	0.5	0.934	1	0.173	1	0.7	1	1	1	1	1	1	1	0.917	0.933	0.555	0.705	0.071	0.636	1	0.571	0.9	0.762	0.636	0.625	0.833	0.8	0.571	0.778	0.571	0.333	0.5	1
South Africa	ZAF	2020	90	86.5333	83.1875	61.95	65	77.3342	0.9	1	0.596	1	0.834833	0.800167	1	0.75	0.5	0.8	1	0.178	1	0.65	0	0.5	1	1	1	1	1	0.405	0.838	0.436	0.495	0.805	0.596	1	0.714	0.909	1	0.636	0.75	1	0.933	0.769	0.778	0.571	1	0.75	1
West Bank and Gaza	PSE	2020	80	91.8	68.0938	74.4	70	76.8588	0.8	1	0.754	1	0.7035	0.556667	1	0.667	1	0.934	0.5	0.542	1	0.7	1	1	0	1	1	1	1	0.776	1	0.5	0.557	0.936	0.754	1	1	0.75	0.286	0.727	0.625	0.833	0.8	0.5	0.444	0.429	0.667	0.5	1
Ukraine	UKR	2020	100	55.1333	75.1625	58.9333	95	76.8458	1	1	0.654	0	0.740667	0.698833	1	0.6945	0.333333	0.666	1	0.358	0	0.95	1	1	1	1	1	1	1	0.71	0.876	0.379	0.483	0.824	0.654	0	1	0.727	0.762	0.455	0.5	1	0.8	0.615	0.778	0.667	0.833	0.5	1
Egypt, Arab Rep.	EGY	2020	100	77.9333	76.5875	69.7083	60	76.8458	1	1	0.338	1	0.718	0.7595	1	0.6945	0.833333	0.6	1	0.355	1	0.6	0	1	1	1	1	1	1	0.033	0.933	0.271	0.45	0	0.338	1	0.857	0.7	0.857	0.727	0.5	0.667	0.933	0.692	0.778	0.571	0.833	0.75	1
Ecuador	ECU	2020	100	89.8667	82.9375	60.7167	45	75.7042	1	1	0.696	1	0.881833	0.7465	1	0.75	0.666667	1	0.5	0.262	0	0.45	1	1	1	1	1	1	1	0.983	0.862	0.405	0.517	0.712	0.696	1	1	0.909	0.905	0.727	0.75	1	1	0.769	0.556	0.571	0.833	0.75	1
Sri Lanka	LKA	2020	90	81.2333	77.5875	83.775	45	75.5192	0.9	1	0.437	1	0.809833	0.712833	1	0.639	1	0.732	1	0.619	1	0.45	0	0.5	1	1	1	1	1	0.438	0.862	0.443	0.443	0	0.437	1	1	0.909	0.905	0.545	0.5	1	1	0.714	0.778	0.571	0.714	0.5	1
Mauritius	MUS	2020	90	86.6667	63.9375	64.825	70	75.0858	0.9	1	0.6	1	0.620167	0.705167	0.5	0.639	1	0.466	1	0.127	1	0.7	1	0.5	1	1	1	1	1	0.802	0.726	0.46	0.548	0.467	0.6	1	0.429	0.8	0.905	0.545	0.375	0.667	1	0.846	0.778	0.571	0.286	0.75	1
Indonesia	IDN	2020	100	91.7333	80.0438	47.8333	55	74.9221	1	1	0.752	1	0.8165	0.7995	1	0.5555	0.833333	0.734	0	0.346	1	0.55	0	1	1	1	1	1	1	0.736	0.952	0.702	0.452	0.919	0.752	1	1	1	0.714	0.727	0.625	0.833	1	0.769	0.778	0.667	0.833	0.75	1
Colombia	COL	2020	100	85	85.575	44.7667	55	74.0683	1	1	0.55	1	0.863167	0.854	1	0.6945	0.666667	0.934	0	0.19	1	0.55	0	1	1	1	1	1	1	0.8	0.312	0.283	0.686	0.669	0.55	1	1	1	0.952	0.727	0.5	1	1	0.846	0.778	0.667	0.833	1	1
Croatia	HRV	2020	90	56	66.45	65.9167	90	73.6733	0.9	1	0.68	0	0.618167	0.6445	0.889	0.639	0.666667	0.866	1	0.104	1	0.9	1	1	1	1	0.5	1	1	0.717	0.967	0.59	0.643	0.483	0.68	0	0.857	0.545	0.81	0.455	0.375	0.667	0.8	0.615	0.667	0.571	0.714	0.5	0.778
Montenegro	MNE	2020	100	73.1	75.4688	57.1917	60	73.1521	1	0.5	0.693	1	0.758167	0.671	1	0.75	0.666667	0.6	1	0.021	-99	0.6	-99	1	1	1	1	1	0.5	0.717	0.9	0.414	0.676	0.757	0.693	1	0.857	0.909	0.905	0.545	0.5	0.833	0.8	0.615	0.778	0.5	0.833	0.5	1
Malaysia	MYS	2020	80	84.2667	78.4688	71.95	50	72.9371	0.8	1	0.528	1	0.741333	0.814	1	0.6115	1	0.532	1	0.346	1	0.5	-99	1	1	0	1	1	1	0.883	0.886	0.386	0.467	0.017	0.528	1	0.714	0.909	0.905	0.545	0.375	1	0.867	0.692	0.778	0.833	0.714	1	1
India	IND	2020	80	88.3333	74.9188	65.025	55	72.6554	0.8	1	0.65	1	0.7065	0.708	1	0.75	1	0.734	0.5	0.367	1	0.55	0	0	1	1	1	1	1	0.826	0.95	0.467	0.581	0.426	0.65	1	0.571	0.909	0.714	0.545	0.5	1	0.867	0.615	0.778	0.571	0.667	0.75	1
Jordan	JOR	2020	80	82.9	80.9625	62.7083	55	72.3142	0.8	1	0.487	1	0.762667	0.785167	1	0.8335	0.833333	0.934	0.5	0.241	1	0.55	0	0	1	1	1	1	1	0.545	0.95	0.457	0.483	0	0.487	1	0.714	0.7	0.81	0.727	0.625	1	0.933	0.846	0.778	0.571	0.833	0.75	1
Saudi Arabia	SAU	2020	80	81.3667	55.8937	77.725	60	70.9971	0.8	1	0.441	1	0.4645	0.651	0.625	0.5	1	0.868	1	0.241	1	0.6	1	1	0	1	1	1	1	0.843	0.567	0.314	0.483	0	0.441	1	0.286	0.444	0.762	0.545	0.25	0.5	1	0.462	0.444	0.571	0.429	1	0.75
Azerbaijan	AZE	2020	80	68.1	68.4938	57.7417	80	70.8671	0.8	0.5	0.543	1	0.687	0.648667	0.75	0.7225	0.666667	0.4	1	0.243	1	0.8	-99	0	1	1	1	1	0.5	0.919	0.795	0.417	0.583	0	0.543	1	0.429	0.7	0.857	0.636	0.5	1	0.867	0.5	0.667	0.429	0.429	1	1
Uruguay	URY	2020	100	86.7	75.9375	65.5917	25	70.6458	1	1	0.601	1	0.799	0.698167	0.9445	0.639	0.666667	0.8	1	0.157	1	0.25	1	1	1	1	1	1	1	0.817	0.514	0.376	0.433	0.867	0.601	1	0.857	0.9	0.81	0.727	0.5	1	1	0.769	0.778	0.571	0.571	0.5	0.889
Rwanda	RWA	2020	100	73.6333	73.9062	53.6583	50	70.2396	1	0.5	0.709	1	0.739833	0.761167	0.75	0.6595	0.833333	1	0	0.313	-99	0.5	-99	1	1	1	1	1	0.5	0.664	0.967	0.512	0.469	0.933	0.709	1	0.857	0.9	0.762	0.545	0.375	1	1	0.769	0.667	0.714	0.667	0.75	1
Peru	PER	2020	90	86.3333	84.0062	50.0583	35	69.0796	0.9	1	0.59	1	0.853667	0.793833	1	0.778	0.833333	1	0	0.169	-99	0.35	-99	1	1	1	1	0.5	1	0.9	0.917	0.571	0.467	0.095	0.59	1	1	0.818	0.952	0.727	0.625	1	1	0.692	0.667	0.571	0.833	1	1
Vietnam	VNM	2020	100	67.9667	60.8687	78.65	35	68.4971	1	0.5	0.539	1	0.635	0.645667	0.5	0.5275	1	0.8	1	0.346	-99	0.35	-99	1	1	1	1	1	0.5	0.738	0.871	0.681	0.402	0	0.539	1	0.571	0.909	0.667	0.455	0.375	0.833	1	0.692	0.778	0.571	0.333	0.5	1
El Salvador	SLV	2020	90	79.3333	68.2188	44.5333	60	68.4171	0.9	1	0.38	1	0.6955	0.716167	0.5	0.7225	0.333333	0.334	1	0.114	0	0.6	0	1	1	1	1	0.5	1	0.402	0.75	0.3	0.448	0	0.38	1	0.571	0.7	0.857	0.545	0.5	1	1	0.769	0.778	0.667	0.333	0.75	1
Senegal	SEN	2020	80	82.9667	64.2375	49.225	65	68.2858	0.8	1	0.489	1	0.683167	0.631667	0.5	0.6945	1	0.8	0	0.169	1	0.65	0	0	1	1	1	1	1	0.064	0.933	0.221	0.467	0.757	0.489	1	0.286	0.909	0.81	0.636	0.625	0.833	1	0.692	0.444	0.571	0.333	0.75	1
Guatemala	GTM	2020	80	62	76.15	58.1583	65	68.2617	0.8	0.5	0.36	1	0.708833	0.747667	1	0.7225	0.333333	0.668	1	0.325	0	0.65	0	0	1	1	1	1	0.5	0.486	0.676	0.257	0.379	0	0.36	1	0.714	0.727	0.857	0.455	0.5	1	0.933	0.692	0.778	0.5	0.833	0.75	1
Uganda	UGA	2020	90	66.6333	80.8937	36.8167	60	66.8688	0.9	0.5	0.499	1	0.838167	0.717167	1	0.8055	0.666667	0.734	0	0.072	1	0.6	0	0.5	1	1	1	1	0.5	0.502	0.9	0.493	0.507	0.09	0.499	1	1	0.889	0.81	0.455	0.875	1	1	0.692	0.444	0.667	1	0.5	1
United Arab Emirates	ARE	2020	100	45.3	64.7125	57.4917	65	66.5008	1	0.5	0.859	0	0.5885	0.6555	0.889	0.556	0.666667	0.266	1	0.367	1	0.65	1	1	1	1	1	1	0.5	1	0.967	0.762	0.729	0.836	0.859	0	0.857	0.444	0.81	0.545	0.375	0.5	1	0.231	0.667	0.571	0.714	0.75	0.778
Tunisia	TUN	2020	90	87.2667	69.6312	52.7833	30	65.9363	0.9	1	0.618	1	0.7535	0.621833	0.75	0.6945	0.333333	0.6	1	0.178	0	0.3	1	0.5	1	1	1	1	1	0.59	0.933	0.59	0.507	0.467	0.618	1	0.571	0.909	0.905	0.636	0.5	1	1	0.357	0.778	0.429	0.667	0.5	1
Uzbekistan	UZB	2020	60	74.0667	69.075	44.175	80	65.4633	0.6	0.5	0.722	1	0.685333	0.629	1	0.583	0	0.4	1	0.367	1	0.8	1	0	1	1	1	0	0.5	0.926	1	0.443	0.336	0.905	0.722	1	0.571	0.889	0.857	0.545	0.25	1	0.867	0.462	0.778	0.5	0.667	0.5	1
Myanmar	MMR	2020	100	67.3333	80.9875	43.6667	35	65.3975	1	0.5	0.52	1	0.788667	0.759833	1	0.8335	0.666667	0.734	0	0.346	-99	0.35	-99	1	1	1	1	1	0.5	0.586	0.867	0.629	0.483	0.033	0.52	1	0.857	0.9	0.714	0.636	0.625	1	1	0.769	0.778	0.429	0.833	0.75	1
Panama	PAN	2020	80	65.9333	76.5187	74.025	30	65.2954	0.8	0.5	0.478	1	0.753167	0.741	1	0.639	1	0.666	1	0.295	1	0.3	0	1	0	1	1	1	0.5	0.59	0.755	0.214	0.771	0.057	0.478	1	1	0.818	0.857	0.636	0.375	0.833	0.933	0.692	0.667	0.571	0.833	0.75	1
Argentina	ARG	2020	70	80.8	81.2375	59.35	35	65.2775	0.7	1	0.424	1	0.776333	0.825167	1	0.6945	0.5	0.666	1	0.208	0	0.35	0	0	1	1	0.5	1	1	0.817	0.455	0.295	0.474	0.081	0.424	1	1	0.909	0.905	0.636	0.375	0.833	1	0.769	0.778	0.571	0.833	1	1
Bosnia and Herzegovina	BIH	2020	80	62.7333	65.0187	57.4833	60	65.0471	0.8	0.5	0.382	1	0.6265	0.6165	0.75	0.7225	0.333333	0.668	1	0.298	1	0.6	1	0	1	1	1	1	0.5	0.243	0.638	0.35	0.681	0	0.382	1	0.429	0.6	0.81	0.545	0.375	1	0.8	0.692	0.778	0.429	0.5	0.5	1
Kuwait	KWT	2020	100	65.1667	64.3375	60.55	35	65.0108	1	0.5	0.455	1	0.582833	0.686167	0.8125	0.5275	0.5	0.732	1	0.19	1	0.35	1	1	1	1	1	1	0.5	0.619	0.917	0.248	0.49	0	0.455	1	0.571	0.667	0.762	0.455	0.375	0.667	1	0.308	0.667	0.571	0.571	1	0.625
Zimbabwe	ZWE	2020	90	66.6667	75.5125	42.6917	50	64.9742	0.9	0.5	0.5	1	0.740833	0.671	1	0.8055	0.666667	0.8	0	0.241	1	0.5	0	0.5	1	1	1	1	0.5	0.379	0.867	0.41	0.467	0.379	0.5	1	0.714	0.889	0.762	0.455	0.625	1	0.867	0.615	0.556	0.571	0.667	0.75	1
Paraguay	PRY	2020	70	61.5667	82.5187	45.1333	65	64.8438	0.7	0.5	0.347	1	0.8005	0.779667	1	0.861	0.833333	0.668	0	0.304	0	0.65	0	1	0	1	1	0.5	0.5	0.19	0.876	0.167	0.5	0	0.347	1	1	0.818	0.905	0.455	0.625	1	1	0.769	0.778	0.667	0.714	0.75	1
Bolivia	BOL	2020	100	66.3667	71.4188	55.7167	30	64.7004	1	0.5	0.491	1	0.726333	0.678167	0.75	0.75	0.666667	0.8	0.5	0.262	0	0.3	0	1	1	1	1	1	0.5	0.74	0.681	0.452	0.583	0	0.491	1	0.714	0.909	0.857	0.545	0.5	0.833	1	0.692	0.556	0.571	0.5	0.75	1
Dominican Republic	DOM	2020	86.6	70.3333	67.6125	36.8667	60	64.2825	0.866	0.5	0.61	1	0.721333	0.674167	0.5	0.7225	0.666667	0.6	0	0.208	0	0.6	0	1	1	0.33	1	1	0.5	0.933	0.967	0.321	0.81	0.017	0.61	1	0.571	0.667	0.905	0.727	0.625	0.833	1	0.692	0.556	0.714	0.333	0.75	1
Pakistan	PAK	2020	100	61.8667	80.4938	44.7083	30	63.4138	1	0.5	0.356	1	0.8175	0.801167	0.9445	0.639	0.833333	0.6	0	0.355	1	0.3	1	1	1	1	1	1	0.5	0.048	0.933	0.321	0.476	0	0.356	1	0.857	0.9	0.762	0.636	0.75	1	0.933	0.846	0.778	0.667	0.833	0.75	0.889
Oman	OMN	2020	100	47.7333	54.2313	68.875	45	63.1679	1	0.5	0.932	0	0.58	0.551167	0.389	0.556	1	0.4	1	0.355	1	0.45	1	1	1	1	1	1	0.5	1	1	0.862	0.8	1	0.932	0	0.143	0.727	0.857	0.545	0.375	0.833	1	0.286	0.556	0.429	0.286	0.75	0.778
Morocco	MAR	2020	60	90.6	76.9813	38.25	50	63.1662	0.6	1	0.718	1	0.785167	0.684333	1	0.75	0.5	0.666	0	0.364	0	0.5	1	0	0	1	1	1	1	0.631	1	0.557	0.5	0.9	0.718	1	0.714	0.909	0.952	0.636	0.5	1	1	0.538	0.556	0.429	0.833	0.75	1
Maldives	MDV	2020	70	67.7333	75.8438	55.9083	45	62.8971	0.7	0.5	0.532	1	0.8195	0.6775	0.9375	0.639	0.333333	0.4	1	0.503	1	0.45	0	0	1	1	1	0.5	0.5	0.893	0.933	0.336	0.5	0	0.532	1	1	0.75	0.857	0.727	0.75	0.833	1	0.538	0.444	0.5	0.833	0.75	0.875
Togo	TGO	2020	90	61.7	76.0938	44.25	40	62.4087	0.9	0.5	0.351	1	0.808833	0.674	1	0.639	1	0.466	0	0.304	1	0.4	0	0.5	1	1	1	1	0.5	0.262	0.738	0.386	0.369	0	0.351	1	0.714	0.9	0.762	0.727	0.75	1	1	0.615	0.667	0.429	0.833	0.5	1
Tanzania	TZA	2020	76.6	71.3	72.7625	46.1583	45	62.3642	0.766	0.5	0.639	1	0.755167	0.6295	1	0.667	0.833333	0.802	0	0.211	1	0.45	1	0.5	1	0.33	1	1	0.5	0.357	0.933	0.464	0.538	0.9	0.639	1	0.857	0.909	0.762	0.545	0.625	0.833	1	0.286	0.444	0.714	0.833	0.5	1
Bangladesh	BGD	2020	90	60.8	79.5312	53.6833	25	61.8029	0.9	0.5	0.324	1	0.824667	0.722	1	0.7225	0.833333	0.666	0.5	0.148	0	0.25	1	0.5	1	1	1	1	0.5	0	0.9	0.19	0.531	0	0.324	1	0.857	0.9	0.714	0.727	0.75	1	1	0.692	0.556	0.667	0.667	0.75	1
Cote d'Ivoire	CIV	2020	90	64.1667	74.6875	38.4917	40	61.4692	0.9	0.5	0.425	1	0.7765	0.696667	0.75	0.8055	0.666667	0.734	0	0.139	1	0.4	0	0.5	1	1	1	1	0.5	0.34	0.867	0.414	0.457	0.048	0.425	1	0.429	0.9	0.762	0.818	0.75	1	1	0.692	0.667	0.571	0.5	0.75	1
Ghana	GHA	2020	76.6	61.5333	82.9562	40.3917	45	61.2963	0.766	0.5	0.346	1	0.886833	0.779	1	0.639	0.666667	0.666	0	0.283	-99	0.45	-99	0.5	1	0.33	1	1	0.5	0.224	0.867	0.302	0.338	0	0.346	1	1	0.9	0.762	0.909	0.75	1	1	0.571	0.556	0.714	0.833	1	1
Zambia	ZMB	2020	90	67.2667	74.325	33.3833	40	60.995	0.9	0.5	0.518	1	0.761667	0.6555	1	0.6945	0.333333	0.668	0	0.334	-99	0.4	-99	0.5	1	1	1	1	0.5	0.464	0.833	0.498	0.512	0.281	0.518	1	0.714	0.889	0.762	0.455	0.75	1	1	0.615	0.556	0.429	0.833	0.5	1
Brunei Darussalam	BRN	2020	90	69.3333	48.375	51.5917	45	60.86	0.9	0.5	0.58	1	0.433667	0.569333	0.389	0.472	0.666667	0.334	1	0.063	1	0.45	0	1	1	1	0.5	1	0.5	0.967	0.967	0.483	0.483	0	0.58	1	0.143	0.444	0.762	0.545	0.375	0.333	1	0.538	0.556	0.286	0.286	0.75	0.778
Cabo Verde	CPV	2020	80	64.8	67.9813	71.075	20	60.7713	0.8	0.5	0.444	1	0.674167	0.611	1	0.583	1	0.466	1	0.377	1	0.2	1	0	1	1	1	1	0.5	0.5	0.75	0.464	0.507	0	0.444	1	0.714	0.667	0.952	0.545	0.5	0.667	0.867	0.462	0.444	0.429	0.714	0.75	1
Qatar	QAT	2020	100	64.5333	56.5312	57.7167	25	60.7563	1	0.5	0.436	1	0.501667	0.651667	0.5625	0.5	0.666667	0.6	1	0.042	1	0.25	1	1	1	1	1	1	0.5	0.569	0.867	0.207	0.505	0.033	0.436	1	0.286	0.375	0.762	0.545	0.375	0.667	1	0.385	0.667	0.429	0.429	1	0.625
Honduras	HND	2020	90	62.2333	77.0812	43.4083	30	60.5446	0.9	0.5	0.367	1	0.722333	0.759	1	0.7225	0.333333	0.734	0.5	0.169	0	0.3	0	1	1	1	1	0.5	0.5	0.769	0.295	0.321	0.45	0	0.367	1	0.857	0.7	0.857	0.545	0.375	1	1	0.692	0.778	0.667	0.667	0.75	1
Botswana	BWA	2020	60	67.5333	70.075	64.925	40	60.5067	0.6	0.5	0.526	1	0.596333	0.744667	1	0.583	1	0.534	1	0.063	1	0.4	1	0.5	0	1	1	0.5	0.5	0.214	0.867	0.329	0.433	0.786	0.526	1	0.714	0.636	0.762	0.091	0.375	1	1	0.769	0.556	0.429	0.714	1	1
St. Lucia	LCA	2020	80	73.5667	57.8188	59.85	30	60.2471	0.8	0.5	0.707	1	0.567333	0.520833	0.75	0.611	0.5	0.4	1	0.494	-99	0.3	-99	0	1	1	1	1	0.5	0.764	0.967	0.352	0.483	0.967	0.707	1	0.714	0.556	0.762	0.455	0.25	0.667	0.867	0.385	0.444	0.429	0.5	0.5	1
Bahrain	BHR	2020	90	72.2333	48.2625	59.5667	30	60.0125	0.9	0.5	0.667	1	0.469833	0.555667	0.3125	0.472	0.666667	0.198	1	0.518	-99	0.3	-99	1	1	1	1	0.5	0.5	0.693	0.75	0.693	0.431	0.767	0.667	1	0.143	0.5	0.714	0.545	0.25	0.667	1	0.286	0.333	0.429	0.286	1	0.625
Seychelles	SYC	2020	80	46.1667	62.05	59.3417	50	59.5117	0.8	1	0.385	0	0.575333	0.6535	0.75	0.5275	0.666667	0.266	1	0.441	-99	0.5	-99	0	1	1	1	1	1	0.343	0.786	0.255	0.41	0.131	0.385	0	0.714	0.556	0.81	0.455	0.25	0.667	1	0.615	0.556	0.429	0.571	0.75	1
Liberia	LBR	2020	90	62.6	70.2375	33.4417	40	59.2558	0.9	0.5	0.378	1	0.698167	0.647167	1	0.583	0.666667	0.532	0	0.139	1	0.4	0	1	1	1	1	0.5	0.5	0.302	0.783	0.402	0.4	0	0.378	1	1	0.889	0.762	0.455	0.25	0.833	1	0.538	0.333	0.429	0.833	0.75	1
Belize	BLZ	2020	80	62.4	58.3438	64.3417	30	59.0171	0.8	0.5	0.372	1	0.599667	0.595167	0.5	0.583	0.666667	0.666	1	0.241	1	0.3	0	0	1	1	1	1	0.5	0.338	0.817	0.336	0.369	0	0.372	1	0.286	0.667	0.857	0.455	0.5	0.833	1	0.615	0.444	0.429	0.333	0.75	1
Samoa	WSM	2020	90	67.5333	69.6125	27.5	40	58.9292	0.9	0.5	0.526	1	0.639	0.6525	1	0.6945	0.5	0.6	0	0	1	0.4	1	0.5	1	1	1	1	0.5	0.61	0.933	0.393	0.41	0.286	0.526	1	0.571	0.889	0.571	0.636	0.5	0.667	0.933	0.538	0.444	0.429	0.571	1	1
Malawi	MWI	2020	80	63.3333	71.7313	46.7083	30	58.3546	0.8	0.5	0.4	1	0.714333	0.645333	1	0.6595	0.833333	0.734	0	0.301	-99	0.3	-99	0.5	1	1	1	0.5	0.5	0.107	0.8	0.295	0.4	0.4	0.4	1	1	0.909	0.714	0.455	0.375	0.833	1	0.385	0.333	0.571	0.833	0.75	1
Angola	AGO	2020	80	62.7	69.9	43.2167	35	58.1633	0.8	0.5	0.381	1	0.6295	0.688167	1	0.639	0.666667	0.8	0	0.262	-99	0.35	-99	0.5	1	1	1	0.5	0.5	0.176	0.862	0.379	0.49	0	0.381	1	0.857	0.556	0.667	0.364	0.5	0.833	1	0.308	0.667	0.571	0.833	0.75	1
Cambodia	KHM	2020	70	61.8333	72.0938	41.575	45	58.1004	0.7	0.5	0.355	1	0.689333	0.696167	1	0.611	1	0.6	0	0.063	1	0.45	0	0	1	1	1	0.5	0.5	0.402	0.69	0.443	0.24	0	0.355	1	0.714	0.667	0.619	0.636	0.5	1	1	0.538	0.556	0.5	0.833	0.75	1
China	CHN	2020	83.4	42.4	64.9625	43.275	55	57.8075	0.834	1	0.272	0	0.667667	0.648	0.75	0.5	1	0.4	0	0.331	1	0.55	1	1	1	0.67	1	0.5	1	0	0.8	0.26	0.302	0	0.272	0	0.714	0.9	0.619	0.273	0.5	1	0.867	0.462	0.667	0.571	0.571	0.75	1
Nepal	NPL	2020	80	62.7	77	46.85	20	57.31	0.8	0.5	0.381	1	0.772833	0.697167	1	0.75	1	0.666	0	0.208	0	0.2	0	0	1	1	1	1	0.5	0.048	0.967	0.41	0.483	0	0.381	1	0.714	0.9	0.762	0.636	0.625	1	1	0.615	0.556	0.429	0.833	0.75	1
Suriname	SUR	2020	60	69.1333	60.8	61.0333	35	57.1933	0.6	0.5	0.574	1	0.672	0.569667	0.5	0.639	0.833333	0.334	1	0.274	1	0.35	1	0	1	0	1	1	0.5	0.29	0.967	0.362	0.483	0.769	0.574	1	0.286	0.7	0.952	0.636	0.625	0.833	1	0.462	0.444	0.429	0.333	0.75	1
Lao PDR	LAO	2020	66.6	64.3333	67.55	46.55	40	57.0067	0.666	0.5	0.43	1	0.791333	0.630333	0.5	0.639	1	0.6	0	0.262	-99	0.4	-99	0	1	0.33	1	1	0.5	0.555	0.752	0.517	0.329	0	0.43	1	0.429	0.875	0.952	0.909	0.75	0.833	1	0.714	0.556	0.429	0.333	0.75	1
Tajikistan	TJK	2020	90	28.3667	72.5187	43.4917	50	56.8754	0.9	0.5	0.351	0	0.728667	0.631	1	0.7225	0.666667	0.468	0.5	0.105	1	0.5	0	0.5	1	1	1	1	0.5	0.55	0.545	0.267	0.395	0	0.351	0	0.714	0.889	0.905	0.364	0.5	1	1	0.357	0.667	0.429	0.833	0.5	1
Nigeria	NGA	2020	80	67.1333	64.8375	36.15	35	56.6242	0.8	0.5	0.514	1	0.700833	0.6115	0.5	0.75	0.5	0.6	0	0.346	-99	0.35	-99	0	1	1	1	1	0.5	0.552	0.9	0.426	0.426	0.267	0.514	1	0.429	0.9	0.762	0.364	0.75	1	1	0.571	0.444	0.571	0.333	0.75	1
Fiji	FJI	2020	90	29.2333	69.0187	49.825	45	56.6154	0.9	0.5	0.377	0	0.6675	0.6545	1	0.5555	0.5	0.4	1	0.093	-99	0.45	-99	0.5	1	1	1	1	0.5	0.19	0.9	0.383	0.41	0	0.377	0	0.714	0.556	0.857	0.545	0.5	0.833	0.933	0.538	0.444	0.429	0.833	0.75	1
Niger	NER	2020	70	59.9333	73.4813	33.875	45	56.4579	0.7	0.5	0.298	1	0.732167	0.671667	1	0.667	0.5	0.602	0	0.253	1	0.45	0	0.5	0	1	1	1	0.5	0.017	0.867	0.174	0.433	0	0.298	1	0.714	0.9	0.81	0.636	0.5	0.833	1	0.462	0.556	0.429	0.833	0.75	1
Jamaica	JAM	2020	60	73.4333	60.475	58.3	30	56.4417	0.6	0.5	0.703	1	0.648333	0.566167	0.5	0.6945	0.5	0.6	1	0.232	0	0.3	0	0	0	1	1	1	0.5	0.648	0.943	0.617	0.483	0.824	0.703	1	0.286	0.778	0.857	0.636	0.5	0.833	0.867	0.462	0.556	0.429	0.333	0.75	1
Benin	BEN	2020	70	69.9	74.4375	32.475	35	56.3625	0.7	0.5	0.597	1	0.739333	0.653	0.9445	0.8335	0.5	0.6	0	0.199	-99	0.35	0	0.5	1	1	1	0	0.5	0.721	0.85	0.605	0.45	0.36	0.597	1	0.714	0.9	0.762	0.727	0.5	0.833	1	0.462	0.444	0.429	0.833	0.75	0.889
Tonga	TON	2020	90	63.2	68.1375	39.3167	20	56.1308	0.9	0.5	0.396	1	0.645	0.597833	1	0.7225	0.666667	0.466	0	0.44	1	0.2	1	0.5	1	1	1	1	0.5	0.114	0.843	0.352	0.44	0.229	0.396	1	0.714	0.667	0.667	0.364	0.625	0.833	1	0.5	0.444	0.429	0.714	0.5	1
Mozambique	MOZ	2020	80	57.0333	66.975	32.0333	40	55.2083	0.8	0.5	0.211	1	0.608833	0.640167	1	0.611	0.833333	0.334	0	0.114	-99	0.4	-99	0.5	1	1	1	0.5	0.5	0.105	0.562	0.04	0.35	0	0.211	1	0.714	0.7	0.667	0.364	0.375	0.833	1	0.385	0.444	0.429	0.833	0.75	1
Cameroon	CMR	2020	70	63.8667	74.375	32.5083	35	55.15	0.7	0.5	0.416	1	0.722333	0.659167	1	0.8055	0.333333	0.6	0	0.367	0	0.35	0	0	1	1	1	0.5	0.5	0.229	0.933	0.319	0.467	0.133	0.416	1	0.714	0.889	0.762	0.636	0.5	0.833	1	0.357	0.444	0.571	0.833	0.75	1
Lebanon	LBN	2020	60	66.0667	67.7938	49.7583	30	54.7238	0.6	0.5	0.482	1	0.639667	0.621833	1	0.639	0.333333	0.332	1	0.325	-99	0.3	-99	0	0	1	1	1	0.5	0.867	0.545	0.514	0.483	0	0.482	1	0.714	0.7	0.81	0.364	0.25	1	0.667	0.615	0.556	0.429	0.714	0.75	1
Afghanistan	AFG	2020	80	59.4333	72.15	20.4	40	54.3967	0.8	0.5	0.283	1	0.743333	0.653	1	0.583	0	0.668	0	0.148	-99	0.4	-99	0	1	1	1	1	0.5	0.098	0.819	0.09	0.41	0	0.283	1	0.857	0.9	0.714	0.364	0.625	1	1	0.462	0.444	0.429	0.833	0.75	1
Sierra Leone	SLE	2020	90	64.4667	66.5	29.1083	20	54.015	0.9	0.5	0.434	1	0.7595	0.569333	0.5	0.8335	0.333333	0.4	0	0.431	0	0.2	0	0.5	1	1	1	1	0.5	0	0.9	0.369	0.45	0.45	0.434	1	0.429	0.889	0.762	0.727	0.75	1	1	0.429	0.333	0.571	0.333	0.75	1
Madagascar	MDG	2020	80	63.4333	69.6188	26.9583	30	54.0021	0.8	0.5	0.403	1	0.745667	0.6385	0.75	0.667	0.333333	0.534	0	0.211	1	0.3	0	0	1	1	1	1	0.5	0.193	0.843	0.45	0.457	0.074	0.403	1	0.571	0.9	0.81	0.818	0.375	1	1	0.429	0.556	0.429	0.667	0.75	1
Kenya	KEN	2020	70	60.6667	66.1875	32.225	40	53.8158	0.7	0.5	0.32	1	0.625167	0.649	0.75	0.7225	0.5	0.4	0	0.389	-99	0.4	-99	0	1	1	1	0.5	0.5	0	0.933	0.181	0.483	0	0.32	1	0.571	0.727	0.714	0.364	0.375	1	1	0.462	0.444	0.571	0.667	0.75	1
Mali	MLI	2020	66.6	64.3667	72.2313	35.4083	30	53.7212	0.666	0.5	0.431	1	0.775167	0.688	0.6945	0.6945	0.333333	0.8	0	0.283	1	0.3	0	0	1	0.33	1	1	0.5	0.269	0.9	0.269	0.45	0.269	0.431	1	0.571	0.909	0.952	0.636	0.75	0.833	1	0.615	0.667	0.429	0.667	0.75	0.889
Namibia	NAM	2020	70	64.7	69.45	34.0417	30	53.6383	0.7	0.5	0.441	1	0.636333	0.697167	1	0.5555	0.666667	0.466	0	0.229	-99	0.3	-99	0.5	1	0	1	1	0.5	0.314	0.886	0.49	0.517	0	0.441	1	0.714	0.727	0.714	0.455	0.375	0.833	1	0.615	0.556	0.429	0.833	0.75	1
Algeria	DZA	2020	80	25.4333	71.7062	49.8917	40	53.4062	0.8	0.5	0.263	0	0.6585	0.688833	1	0.6945	0.666667	0.266	1	0.063	1	0.4	1	0	1	1	1	1	0.5	0.04	0.743	0.148	0.383	0	0.263	0	0.714	0.778	0.762	0.364	0.5	0.833	1	0.462	0.778	0.429	0.714	0.75	1
Burkina Faso	BFA	2020	80	35.7	71.8063	33.325	45	53.1662	0.8	0.5	0.571	0	0.686333	0.71	1	0.5555	0.5	0.466	0	0.367	0	0.45	-99	0	1	1	1	1	0.5	0.693	0.867	0.586	0.433	0.279	0.571	0	0.714	0.889	0.762	0.545	0.375	0.833	1	0.692	0.556	0.429	0.833	0.75	1
Lesotho	LSO	2020	80	35.5333	62.1063	47.975	40	53.1229	0.8	0.5	0.566	0	0.719667	0.538333	0.5	0.6945	1	0.666	0	0.253	0	0.4	-99	0	1	1	1	1	0.5	0.455	0.967	0.545	0.54	0.324	0.566	0	0.429	0.9	0.762	0.727	0.5	1	1	0.385	0.333	0.429	0.333	0.75	1
St. Vincent and the Grenadines	VCT	2020	60	68.4667	52.4062	48.3083	35	52.8362	0.6	0.5	0.554	1	0.501167	0.452	0.75	0.583	0.333333	0.198	1	0.401	0	0.35	-99	0	1	1	1	0	0.5	0.6	0.767	0.438	0.4	0.567	0.554	1	0.429	0.444	0.762	0.455	0.25	0.667	0.867	0.154	0.333	0.429	0.429	0.5	1
Sao Tome and Principe	STP	2020	60	61.6667	58.2437	52.1583	30	52.4138	0.6	0.5	0.35	1	0.633167	0.521833	0.5	0.6945	0.333333	0.334	1	0.419	1	0.3	1	0	1	1	1	0	0.5	0.048	0.819	0.369	0.514	0	0.35	1	0.429	0.778	0.762	0.455	0.375	1	1	0.286	0.333	0.429	0.333	0.75	1
Nicaragua	NIC	2020	80	60.3333	53.7812	32.5417	35	52.3312	0.8	0.5	0.31	1	0.526667	0.5465	0.5	0.583	0.666667	0.466	0	0.169	-99	0.35	-99	0.5	1	1	1	0.5	0.5	0.286	0.743	0.136	0.383	0	0.31	1	0.429	0.7	0.857	0.091	0.25	0.833	0.867	0.385	0.444	0.5	0.333	0.75	1
Iran, Islamic Rep.	IRN	2020	80	29.3	61.2687	60.2917	30	52.1721	0.8	0.5	0.379	0	0.666333	0.6435	0.5	0.472	0.666667	0.534	1	0.211	1	0.3	1	1	0	1	1	1	0.5	0.379	0.769	0.336	0.41	0	0.379	0	0.429	0.667	0.857	0.545	0.5	1	1	0.429	0.778	0.571	0.333	0.75	1
Palau	PLW	2020	70	57.8667	47.4688	44.4833	40	51.9637	0.7	0.5	0.236	1	0.3535	0.525833	0.6875	0.472	0.333333	0.066	1	0.38	1	0.4	0	0	1	1	1	0.5	0.5	0.081	0.633	0.148	0.317	0	0.236	1	0.429	0.375	0.476	0.091	0.25	0.5	1	0.214	0.333	0.429	0.429	0.75	0.875
Guyana	GUY	2020	70	60.9667	59.1938	34.0583	35	51.8438	0.7	0.5	0.329	1	0.546	0.588	0.6945	0.639	0.333333	0.466	0.5	0.063	-99	0.35	-99	0	1	1	0.5	1	0.5	0.226	0.426	0.236	0.219	0.538	0.329	1	0.429	0.556	0.81	0.273	0.375	0.833	0.867	0.538	0.444	0.429	0.5	0.75	0.889
Timor-Leste	TLS	2020	40	60.6333	64.2313	34.8083	55	50.9346	0.4	0.5	0.319	1	0.625667	0.596333	0.75	0.7225	0.333333	0.734	0	0.325	0	0.55	-99	0	0	0	1	1	0.5	0.105	0.867	0.188	0.433	0	0.319	1	0.571	0.556	0.714	0.455	0.625	0.833	1	0.538	0.444	0.429	0.667	0.5	1
Bhutan	BTN	2020	70	60.6	68.35	40.5083	15	50.8917	0.7	0.5	0.318	1	0.662667	0.6415	1	0.5555	0.833333	0.534	0	0.253	0	0.15	1	0.5	0	1	1	1	0.5	0.04	0.867	0.202	0.481	0	0.318	1	1	0.7	0.571	0.455	0.25	1	1	0.231	0.333	0.571	0.714	1	1
Ethiopia	ETH	2020	70	55.8667	74.6688	36.8833	15	50.4838	0.7	0.5	0.176	1	0.7815	0.672667	1	0.611	0.333333	0.934	0	0.208	-99	0.15	-99	0.5	1	1	1	0	0.5	0	0.476	0.14	0.262	0	0.176	1	0.714	0.909	0.952	0.364	0.75	1	1	0.357	0.667	0.429	0.833	0.75	1
Eswatini	SWZ	2020	90	20.6	70.4875	28.3167	40	49.8808	0.9	0.5	0.118	0	0.675667	0.694833	1	0.5275	0.666667	0.466	0	0	1	0.4	0	0.5	1	1	1	1	0.5	0	0.295	0.148	0.148	0	0.118	0	0.857	0.7	0.667	0.455	0.375	1	1	0.571	0.444	0.571	0.833	0.75	1
Burundi	BDI	2020	56.6	64.0333	77.0062	15.7417	35	49.6763	0.566	0.5	0.421	1	0.788167	0.672667	1	0.778	0.166667	0.4	0	0.063	1	0.35	0	0	1	0.33	1	0.5	0.5	0.2	0.819	0.436	0.426	0.224	0.421	1	0.714	0.9	0.714	0.818	0.75	0.833	1	0.357	0.667	0.429	0.833	0.75	1
Mauritania	MRT	2020	70	60.9	52.6812	24.0083	40	49.5179	0.7	0.5	0.327	1	0.4965	0.584333	0.5	0.472	0.333333	0.534	0	0.093	1	0.4	0	0.5	0	1	1	1	0.5	0.138	0.8	0.221	0.383	0.09	0.327	1	0.286	0.8	0.571	0.364	0.125	0.833	0.9	0.538	0.556	0.429	0.333	0.75	1
Guinea	GIN	2020	80	61.7667	62.8875	22.5833	20	49.4475	0.8	0.5	0.353	1	0.699833	0.551167	0.5	0.778	0.333333	0.266	0	0.304	1	0.2	0	0	1	1	1	1	0.5	0	1	0.264	0.5	0	0.353	1	0.286	0.889	0.714	0.727	0.75	0.833	1	0.462	0.333	0.429	0.333	0.75	1
Bahamas, The	BHS	2020	80	28.6333	38.55	28.5333	65	48.1433	0.8	0.5	0.359	0	0.291167	0.475333	0.3125	0.472	0.333333	0.266	0.5	0.042	-99	0.65	-99	1	1	1	1	0	0.5	0	0.9	0.355	0.54	0	0.359	0	0.143	0.25	0.714	0.182	0.125	0.333	1	0.308	0.222	0.286	0.286	0.75	0.625
Venezuela, RB	VEN	2020	66.6	59.9	52.4813	34.1	25	47.6163	0.666	0.5	0.297	1	0.485833	0.524667	0.5	0.667	0.5	0.2	0.5	0.164	-99	0.25	-99	0	1	0.33	1	1	0.5	0.467	0.342	0.332	0.345	0	0.297	1	0.143	0.556	0.81	0.364	0.375	0.667	0.933	0.286	0.667	0.429	0.333	0.5	1
Gambia, The	GMB	2020	60	32.7333	78.0938	36.4417	30	47.4537	0.6	0.5	0.482	0	0.832	0.715667	0.9375	0.667	0.666667	0.534	0	0.257	1	0.3	0	0	1	1	1	0	0.5	0.612	0.833	0.414	0.488	0.064	0.482	0	0.714	0.9	0.81	0.818	0.75	1	1	0.615	0.667	0.429	0.833	0.75	0.875
Congo, Dem. Rep.	COD	2020	60	68.0667	64.5687	18.2	20	46.1671	0.6	0.5	0.542	1	0.694667	0.592	0.75	0.5555	0	0.466	0	0.262	-99	0.2	0	0	1	1	1	0	0.5	0.271	0.9	0.452	0.571	0.517	0.542	1	0.429	0.889	0.714	0.636	0.5	1	1	0.429	0.444	0.429	0.5	0.75	1
Trinidad and Tobago	TTO	2020	60	27.4	57.9562	43.1583	40	45.7029	0.6	0.5	0.322	0	0.5	0.573333	0.889	0.5275	0.333333	0.266	1	0.127	-99	0.4	-99	0	0	1	1	1	0.5	0.49	0.543	0.305	0.271	0	0.322	0	0.571	0.4	0.714	0.273	0.375	0.667	1	0.154	0.667	0.286	0.833	0.5	0.778
Papua New Guinea	PNG	2020	60	57.8333	65.4188	15.6583	25	44.7821	0.6	0.5	0.235	1	0.606333	0.6105	1	0.583	0.333333	0.2	0	0.093	-99	0.25	-99	0	1	1	1	0	0.5	0.095	0.552	0.252	0.229	0.048	0.235	1	0.714	0.556	0.762	0.273	0.5	0.833	1	0.214	0.556	0.429	0.714	0.75	1
Dominica	DMA	2020	60	32.8	47.5812	52.3167	30	44.5396	0.6	0.5	0.484	0	0.438167	0.488167	0.4445	0.583	0.666667	0.132	1	0.294	1	0.3	0	0	1	1	1	0	0.5	0.324	0.738	0.321	0.298	0.738	0.484	0	0.286	0.667	0.429	0.455	0.125	0.667	0.9	0.231	0.333	0.429	0.286	0.75	0.889
Chad	TCD	2020	70	57.0333	62.4688	18.0167	15	44.5037	0.7	0.5	0.211	1	0.663	0.632333	0.5	0.6115	0.166667	0.334	0	0.22	0	0.15	0	0	1	1	1	0.5	0.5	0.033	0.524	0.221	0.279	0	0.211	1	0.286	0.889	0.667	0.636	0.5	1	1	0.615	0.667	0.429	0.333	0.75	1
Antigua and Barbuda	ATG	2020	60	28.8667	59.0688	47.775	25	44.1421	0.6	0.5	0.366	0	0.529167	0.576167	0.9375	0.472	0.5	0.066	1	0.345	0	0.25	1	0	1	1	1	0	0.5	0.274	0.567	0.14	0.379	0.471	0.366	0	0.714	0.286	0.762	0.455	0.125	0.833	1	0.231	0.333	0.429	0.714	0.75	0.875
Vanuatu	VUT	2020	56.6	59.1333	57.1562	21.9	15	41.9579	0.566	0.5	0.274	1	0.5025	0.521667	1	0.5	0.5	0.266	0	0.11	1	0.15	0	0	1	0.33	1	0.5	0.5	0.099	0.659	0.225	0.385	0	0.274	1	0.714	0.556	0.571	0.091	0.25	0.833	1	0.154	0.333	0.429	0.714	0.5	1
Iraq	IRQ	2020	30	34.0333	71.5312	38.6583	35	41.8446	0.3	0.5	0.521	0	0.6955	0.702833	1	0.5275	0.333333	0.4	0.5	0.313	1	0.35	0	0	0	0	1	0.5	0.5	0.095	0.952	0.338	0.362	0.857	0.521	0	0.571	0.909	0.905	0.455	0.5	0.833	1	0.538	0.667	0.429	0.833	0.75	1
Sudan	SDN	2020	53.4	57.9333	61.5625	24.6333	10	41.5058	0.534	0.5	0.238	1	0.5965	0.536	1	0.5275	0.333333	0.466	0	0.186	1	0.1	0	0	1	0.67	1	0	0.5	0	0.576	0.254	0.358	0	0.238	1	0.714	0.636	0.476	0.545	0.375	0.833	0.867	0.143	0.444	0.429	0.833	0.5	1
Solomon Islands	SLB	2020	50	59.4	57.3	14.8583	25	41.3117	0.5	0.5	0.282	1	0.519833	0.526667	0.75	0.6945	0.333333	0.134	0	0.127	-99	0.25	-99	0	1	1	0.5	0	0.5	0.155	0.612	0.269	0.374	0	0.282	1	0.429	0.556	0.762	0.455	0.25	0.667	0.933	0.286	0.333	0.429	0.429	0.75	1
Djibouti	DJI	2020	50	59.7	51.6938	17.5583	25	40.7904	0.5	0.5	0.291	1	0.519667	0.5255	0.5	0.5	0.333333	0.2	0	0.169	0	0.25	0	0	0	1	1	0.5	0.5	0.148	0.667	0.229	0.333	0.081	0.291	1	0.571	0.556	0.571	0.545	0.375	0.5	1	0.308	0.333	0.429	0.333	0.75	1
Haiti	HTI	2020	60	17.9333	64.9938	16.6833	40	39.9221	0.6	0.5	0.038	0	0.655667	0.568167	0.75	0.778	0.333333	0.334	0	0	-99	0.4	-99	0	1	1	1	0	0.5	0	0.095	0.048	0.048	0	0.038	0	0.429	0.778	0.905	0.364	0.625	0.833	1	0.286	0.444	0.429	0.5	0.75	1
Congo, Rep.	COG	2020	60	29.4333	52.2812	29.4667	25	39.2362	0.6	0.5	0.383	0	0.530833	0.53	0.5	0.5	0.666667	0.334	0	0.178	1	0.25	0	0	1	1	1	0	0.5	0	0.867	0.41	0.638	0	0.383	0	0.286	0.7	0.619	0.455	0.125	1	0.867	0.357	0.444	0.429	0.333	0.75	1
Micronesia, Fed. Sts.	FSM	2020	30	61.6	55.2188	19.7333	15	36.3104	0.3	0.5	0.348	1	0.4555	0.554	1	0.389	0.333333	0.134	0	0.322	-99	0.15	-99	0	0	0	1	0.5	0.5	0.517	0.6	0.3	0.324	0	0.348	1	0.714	0.429	0.476	0.364	0.25	0.5	0.867	0.231	0.333	0.429	0.714	0.75	1
Yemen, Rep.	YEM	2020	66.6	27.5	47.725	16.0917	20	35.5833	0.666	0.5	0.325	0	0.4435	0.486667	0.5	0.5275	0.166667	0.266	0	0.211	-99	0.2	-99	0	1	0.33	1	1	0.5	0.85	0.067	0.236	0.474	0	0.325	0	0.286	0.6	0.619	0.364	0.125	0.667	1	0.214	0.444	0.429	0.333	0.5	1
Marshall Islands	MHL	2020	30	60.8333	58.0812	18.3833	10	35.4596	0.3	0.5	0.325	1	0.521333	0.566833	0.9375	0.4445	0.333333	0.066	0	0.336	-99	0.1	-99	0	0	0	1	0.5	0.5	0	0.738	0.369	0.517	0	0.325	1	0.714	0.571	0.381	0.545	0.25	0.667	0.867	0.308	0.333	0.429	0.714	0.75	0.875
Kiribati	KIR	2020	20	59.1	66.1437	15.5333	15	35.1554	0.2	0.5	0.273	1	0.645667	0.574167	0.9375	0.6945	0.333333	0.266	0	0.022	-99	0.15	-99	0	0	0	0.5	0.5	0.5	0.251	0.594	0.249	0.273	0	0.273	1	0.714	0.667	0.857	0.636	0.5	0.5	0.933	0.286	0.333	0.429	0.714	0.75	0.875
St. Kitts and Nevis	KNA	2020	40	30.0667	35.825	42.9833	25	34.775	0.4	0.5	0.402	0	0.285833	0.408	0.3125	0.472	0.333333	0.132	1	0.254	1	0.25	1	0	0	1	1	0	0.5	0.5	0.467	0.29	0.267	0.486	0.402	0	0.143	0.25	0.333	0.364	0.125	0.5	1	0.154	0.222	0.286	0.286	0.5	0.625
Equatorial Guinea	GNQ	2020	10	59.1	51.9688	23.6667	25	33.9471	0.1	0.5	0.273	1	0.441667	0.573833	0.75	0.361	0.666667	0.132	0	0.148	1	0.25	1	0	0	0	0.5	0	0.5	0.024	0.8	0.14	0.4	0	0.273	1	0.571	0.5	0.571	0.091	0.25	0.667	0.867	0.286	0.444	0.429	0.667	0.75	1
Guinea-Bissau	GNB	2020	46.6	23.6667	59.6313	14.6167	15	31.9029	0.466	0.5	0.21	0	0.593	0.582833	0.6875	0.5555	0.166667	0.334	0	0.084	-99	0.15	-99	0	1	0.33	1	0	0.5	0	0.571	0.19	0.286	0	0.21	0	0.571	0.667	0.714	0.273	0.5	0.833	0.933	0.385	0.333	0.429	0.667	0.75	0.875
Gabon	GAB	2020	40	25.5667	50.5438	16.0333	20	30.4288	0.4	0.5	0.267	0	0.517833	0.552167	0.4445	0.389	0.333333	0.266	0	0.042	1	0.2	1	0	0	1	1	0	0.5	0.095	0.571	0.333	0.286	0.048	0.267	0	0.571	0.7	0.571	0.182	0.25	0.833	1	0.357	0.444	0.429	0.333	0.75	0.889
Somalia	SOM	2020	40	43.7667	56.6125	1.275	10	30.3308	0.4	0	0.313	1	0.475667	0.543333	1	0.472	0	0	0	0.051	-99	0.1	-99	0	0	1	1	0	0	0.057	0.524	0.198	0.286	0.5	0.313	1	0.429	0.625	0.667	0.091	0.375	0.667	0.867	0.214	0.333	0.429	0.667	0.75	1
South Sudan	SSD	2020	20	43	53.8813	10.6917	20	29.5146	0.2	0	0.29	1	0.485333	0.599667	0.75	0.3055	0.166667	0.198	0	0.063	1	0.2	0	0	0	0	1	0	0	0.376	0.376	0.376	0.188	0.133	0.29	1	0.714	0.5	0.524	0.091	0.25	0.833	1	0.308	0.444	0.429	0.667	0.75	1
Turkmenistan	TKM	2020	46.6	0.466667	60.4562	13.3333	15	27.1713	0.466	0	0.014	0	0.659667	0.5265	0.75	0.528	0.333333	0.2	0	0	-99	0.15	-99	0	1	0.33	1	0	0	0	0.048	0.024	0	0	0.014	0	0.429	0.75	0.81	0.636	0.5	0.833	1	0.357	0.444	0.429	0.429	0.5	1
Syrian Arab Republic	SYR	2020	16.6	25.2	43.4875	16.9167	25	25.4408	0.166	0.5	0.256	0	0.409	0.463667	0.5	0.361	0.166667	0.332	0	0.178	-99	0.25	-99	0	0	0.33	0.5	0	0.5	0.326	0.44	0.129	0.383	0	0.256	0	0.143	0.5	0.762	0.091	0.125	0.833	0.933	0.143	0.444	0.429	0.333	0.5	1
Libya	LBY	2020	20	21.3333	42.9062	10.3167	20	22.9112	0.2	0.5	0.14	0	0.3655	0.4825	0.5	0.3885	0.166667	0.132	0	0.114	1	0.2	0	0	0	0	1	0	0.5	0	0	0.302	0.4	0	0.14	0	0.286	0.5	0.524	0.091	0.125	0.667	0.7	0.286	0.444	0.429	0.286	0.75	1
American Samoa	ASM	2020	40		19.0375				0.4	0			0.0915	0.226333	0.375	0.1945			1		-99		-99	1	0	0	1	0	0								0	0	0.091	0	0.125	0.333	0.6	0	0.222	0.143	0.143	0.25	0.75
Andorra	AND	2020	80		34.25		10		0.8	0		0	0.284	0.360833	0.389	0.4165	0.333333	0.4	1		1	0.1	1	1	1	1	1	0	0							0	0.143	0.143	0.429	0.364	0.125	0.5	0.8	0.071	0.222	0.286	0.286	0.5	0.778
Aruba	ABW	2020	60		21.3188				0.6	0.5			0.1085	0.2725	0.3125	0.25			1		-99		-99	1	0	1	1	0	0.5								0.143	0.25	0.091	0	0	0.167	0.8	0.077	0.222	0.143	0.143	0.25	0.625
Barbados	BRB	2020	100		57.4		35		1	0.5		1	0.502333	0.590833	0.8125	0.5	0.333333	0.2	1		1	0.35	0	1	1	1	1	1	0.5							1	0.571	0.4	0.762	0.364	0.25	0.667	1	0.462	0.333	0.286	0.714	0.75	0.625
Bermuda	BMU	2020	60		24.9875				0.6	0			0.163833	0.268667	0.3125	0.389			1		-99		-99	1	0	1	1	0	0								0.143	0.143	0.091	0.273	0	0.333	0.6	0.143	0.333	0.143	0.143	0.25	0.625
British Virgin Islands	VGB	2020	60		26.0813				0.6	0			0.192167	0.325167	0.3125	0.222			1		0		-99	1	0	1	1	0	0								0.143	0.143	0.045	0.364	0.125	0.333	0.8	0.143	0.222	0.143	0.143	0.5	0.625
Cayman Islands	CYM	2020	70		24.25				0.7	0			0.169167	0.2715	0.3125	0.3055			1		0		1	1	0	1	0.5	1	0								0.143	0.25	0.091	0.364	0	0.167	0.8	0.071	0.222	0.143	0.143	0.25	0.625
Central African Republic	CAF	2020	30		57.2		20		0.3	0.5		1	0.6305	0.533667	0.5	0.5835	0.166667	0.2	0		1	0.2	0	0	0	1	0.5	0	0.5							1	0.286	0.875	0.667	0.455	0.5	1	1	0.357	0.333	0.429	0.333	0.75	1
Channel Islands	CHI	2020	60						0.6	0											-99		-99	1	0	1	1	0	0
Comoros	COM	2020	60		61.2188		30		0.6	0.5		0	0.536667	0.586667	1	0.5275	0.333333	0.4	0		0	0.3	0	0	0	1	1	1	0.5							0	0.571	0.444	0.667	0.455	0.25	0.833	0.867	0.308	0.333	0.429	0.833	0.75	1
Cuba	CUB	2020	60		67.4313				0.6	0	0.446		0.721333	0.623	0.75	0.6115			1	0.396	-99		-99	1	1	0	1	0	0	0.345	0.933	0.05	0.9	0	0.446		0.571	0.667	0.905	0.727	0.625	0.833	0.8	0.286	0.556	0.429	0.667	1	1
Curacao	CUW	2020	80		26.6875				0.8	0			0.1475	0.386	0.3125	0.222			1		0		1	1	0	1	1	1	0								0.143	0.143	0.091	0.091	0.25	0.167	0.8	0.286	0.444	0.143	0.143	0.5	0.625
Eritrea	ERI	2020	16.6		45.0812		15		0.166	0		0	0.426167	0.498333	0.5	0.333	0	0	0		-99	0.15	-99	0	0	0.33	0.5	0	0							0	0.143	0.5	0.667	0.455	0.125	0.667	0.867	0.214	0.444	0.429	0.286	0.75	1
Faroe Islands	FRO	2020	60		15.1312				0.6	0			0.0313333	0.184667	0.3125	0.25			1		1		1	1	0	1	1	0	0								0	0.143	0.045	0	0	0	0.6	0	0.222	0.143	0.143	0	0.625
French Polynesia	PYF	2020	60		22.2063				0.6	0			0.112333	0.2715	0.375	0.25			1		-99		-99	1	0	1	1	0	0								0	0.25	0.091	0	0	0.333	0.8	0.071	0.222	0.143	0.143	0.25	0.75
Gibraltar	GIB	2020	60		20.0688				0.6	0			0.123667	0.203167	0.375	0.25			1		-99		-99	1	0	1	1	0	0								0	0	0.045	0.364	0	0.333	0.6	0	0.333	0.143	0.143	0	0.75
Greenland	GRL	2020	60		19.3938				0.6	0	0.578		0.112333	0.1965	0.375	0.25			1	0.247	-99		-99	1	0	1	0.5	0.5	0	0.638	0.638	0.571	0.402	0.638	0.578		0	0.25	0.091	0	0	0.333	0.6	0.071	0.222	0.143	0.143	0	0.75
Grenada	GRD	2020	70		55.9562		20		0.7	0.5		0	0.530167	0.508167	0.75	0.6115	0.666667	0.266	1		1	0.2	-99	0	1	1	0.5	1	0.5							0	0.429	0.375	0.714	0.455	0.375	0.833	0.8	0.308	0.333	0.429	0.429	0.75	1
Guam	GUM	2020	60		21.1875				0.6	0			0.115333	0.2715	0.3125	0.222			1		-99		-99	1	0	1	1	0	0								0	0.143	0.091	0	0.125	0.333	0.8	0.071	0.222	0.143	0.143	0.25	0.625
Hong Kong SAR, China	HKG	2020	80		31.0625				0.8	1	0.819		0.234	0.302667	0.375	0.5			1	0.693	1		1	1	0	1	1	1	1	0.917	0.983	0.562	0.667	0.967	0.819		0.143	0.375	0.091	0.545	0.25	0	0.6	0.231	0.556	0.286	0.143	0	0.75
Isle of Man	IMN	2020	70		11.7				0.7	0			0.0516667	0.142333	0.1875	0.1665			1		-99		-99	1	0	1	1	0.5	0								0.143	0	0	0	0	0.167	0.6	0	0.111	0	0.143	0	0.375
Korea, Dem. People's Rep.	PRK	2020	30		50.675				0.3	0			0.533833	0.521333	0.5	0.3885			0		0		-99	1	0	0	0.5	0	0								0	0.875	0.714	0.364	0.25	1	0.933	0.286	0.444	0.429	0.286	0.75	1
Kosovo	XKX	2020	40	67.9667			60		0.4	0.5	0.539	1					0.666667	1		0.312	-99	0.6	-99	1	0	1	0	0	0.5	0.486	0.952	0.529	0.476	0.25	0.539	1
Liechtenstein	LIE	2020	70		31.3438				0.7	0	0.515		0.221167	0.3275	0.389	0.4725			1	0.449	1		1	1	0	1	1	0.5	0	0.671	0.695	0.376	0.44	0.393	0.515		0.143	0.286	0.091	0.182	0.125	0.5	0.6	0.071	0.222	0.429	0.143	0.5	0.778
Macao SAR, China	MAC	2020	80		29.4187				0.8	0.5	0.486		0.2115	0.320667	0.3125	0.4445			1	0.462	1		1	1	0	1	1	1	0.5	0.683	0.8	0.24	0.4	0.305	0.486		0.143	0.286	0.045	0.545	0.25	0	0.6	0.154	0.444	0.333	0.143	0.25	0.625
Monaco	MCO	2020	90		29.6125				0.9	0			0.241	0.2525	0.5	0.3885			1		-99		-99	1	1	1	1	0.5	0								0.143	0.167	0.238	0.273	0.125	0.5	0.4	0.071	0.222	0.143	0.429	0.25	0.5
Nauru	NRU	2020	40		46.3937		5		0.4	0		1	0.415333	0.472333	0.6875	0.361	0.333333	0.066	1		1	0.05	0	0	0	1	1	0	0							1	0.429	0.429	0.429	0.455	0.25	0.5	1	0.143	0.333	0.429	0.429	0.5	0.875
New Caledonia	NCL	2020	70		23.0125				0.7	0			0.170833	0.253	0.375	0.1945			1		1		-99	1	0	1	1	0.5	0								0.143	0.333	0.091	0	0.125	0.333	0.8	0.071	0.111	0.143	0.143	0.25	0.75
Northern Mariana Islands	MNP	2020	60		16.1438				0.6	0			0.0838333	0.184667	0.375	0.111			1		1		0	1	0	1	1	0	0								0	0	0.045	0	0.125	0.333	0.6	0	0.222	0.143	0.143	0	0.75
Puerto Rico	PRI	2020	80		28.4937				0.8	0			0.231	0.2835	0.375	0.361			1		1		1	1	0	1	1	1	0								0.143	0.375	0.095	0.273	0	0.5	0.8	0.143	0.222	0.143	0.143	0.25	0.75
San Marino	SMR	2020	90	58	28.3438		60		0.9	0.5	0.24	1	0.285833	0.284833	0.278	0.2775			1	0.28	-99	0.6	-99	1	1	1	1	0.5	0.5	0.238	0.486	0.162	0.314	0	0.24	1	0.143	0.25	0.333	0.364	0.125	0.5	0.4	0.154	0.333	0.286	0.286	0.25	0.556
Sint Maarten (Dutch part)	SXM	2020	50		16.4688				0.5	0			0.083	0.1965	0.3125	0.1665			1		-99		-99	1	0	1	0.5	0	0								0.143	0.143	0.045	0	0	0.167	0.6	0.071	0.222	0.143	0.143	0	0.625
St. Martin (French part)	MAF	2020	40		13.9187				0.4	0			0.0793333	0.150667	0.3125	0.111			1		-99		-99	1	0	1	0	0	0								0.143	0	0	0	0	0.333	0.4	0	0.111	0	0.143	0.25	0.625
Taiwan, China	TWN	2020	60						0.6	0	0.68									0.211	-99		-99	1	0	1	0	1	0	0.85	0.843	0.457	0.467	0.783	0.68
Turks and Caicos Islands	TCA	2020	60		22.1938				0.6	0			0.151333	0.2715	0.3125	0.1945			1		-99		-99	1	0	1	1	0	0								0.143	0.143	0.091	0.364	0	0.167	0.8	0.071	0.222	0.143	0.143	0.25	0.625
Tuvalu	TUV	2020	40		54.775		5		0.4	0.5		1	0.523167	0.516167	0.875	0.389	0.333333	0.2	0		-99	0.05	-99	0	1	0	0.5	0.5	0.5							1	0.571	0.429	0.476	0.455	0.375	0.833	0.867	0.286	0.444	0.429	0.571	0.5	0.75
Virgin Islands (U.S.)	VIR	2020	60		18.7				0.6	0			0.0793333	0.259667	0.3125	0.1665			1		-99		-99	1	0	1	1	0	0								0.143	0	0	0	0	0.333	0.8	0	0.222	0.143	0.143	0.25	0.625
Norway	NOR	2019	100	92.2333	77.5687	80.6667	100	90.0938	1	1	0.767	1	0.757833	0.782167	1	0.5855	0.666667	1	1	0.56	1	1	1	1	1	1	1	1	1	1	1	0.623	0.67	0.542	0.767	1	1	0.889	0.905	0.545	0.375	0.833	0.8	0.643	1	0.5	1	0.75	1
Italy	ITA	2019	100	91.8667	75.2875	81.825	100	89.7958	1	1	0.756	1	0.711167	0.787167	1	0.528	1	0.934	1	0.339	1	1	1	1	1	1	1	1	1	0.771	0.786	0.69	0.762	0.771	0.756	1	0.857	0.8	0.857	0.545	0.375	0.833	0.8	0.769	1	0.571	0.833	0.75	1
Austria	AUT	2019	100	91.3	74.55	79.75	100	89.12	1	1	0.739	1	0.721667	0.750667	1	0.547	1	0.866	1	0.324	1	1	1	1	1	1	1	1	1	0.907	0.963	0.686	0.703	0.434	0.739	1	1	0.6	0.9	0.455	0.375	1	0.8	0.692	1	0.429	0.833	0.75	1
Poland	POL	2019	100	95.1	70.5375	79.7167	100	89.0708	1	1	0.853	1	0.678667	0.7515	0.75	0.6025	0.666667	0.934	1	0.588	1	1	1	1	1	1	1	1	1	1	1	0.68	0.679	0.905	0.853	1	0.714	0.7	0.905	0.545	0.375	0.833	0.8	0.692	1	0.667	0.6	0.75	1
Slovenia	SVN	2019	100	96.9333	76.2812	71.4417	100	88.9313	1	1	0.908	1	0.7335	0.791333	1	0.528	0.666667	0.934	1	0.257	1	1	1	1	1	1	1	1	1	0.963	1	0.784	0.897	0.897	0.908	1	1	0.7	0.857	0.636	0.375	0.833	0.8	0.769	1	0.429	1	0.75	1
United States	USA	2019	100	94	63.1187	87.5	100	88.9237	1	1	0.82	1	0.593	0.604833	0.9445	0.5115	1	1	1	0.5	1	1	1	1	1	1	1	1	1	0.83	0.952	0.566	0.797	0.952	0.82	1	0.857	0.7	0.762	0.364	0.375	0.5	0.6	0.571	0.625	0.5	0.833	0.5	0.889
Spain	ESP	2019	100	90.8667	75.5375	77.8667	100	88.8542	1	1	0.726	1	0.6945	0.804167	1	0.547	0.666667	1	1	0.448	1	1	1	1	1	1	1	1	1	0.802	0.981	0.629	0.777	0.439	0.726	1	0.857	0.7	0.857	0.545	0.375	0.833	0.8	0.846	1	0.429	1	0.75	1
Sweden	SWE	2019	100	94.8667	75.2375	72.5167	100	88.5242	1	1	0.846	1	0.712167	0.7785	1	0.547	0.666667	0.8	1	0.434	1	1	1	1	1	1	1	1	1	0.878	0.926	0.728	0.822	0.874	0.846	1	1	0.8	0.81	0.455	0.375	0.833	0.8	0.692	1	0.429	1	0.75	1
Finland	FIN	2019	100	94.9333	75.2375	72.2167	100	88.4775	1	1	0.848	1	0.7035	0.787167	1	0.547	0.666667	0.8	1	0.422	1	1	1	1	1	1	1	1	1	0.859	0.963	0.689	0.897	0.834	0.848	1	1	0.7	0.857	0.545	0.286	0.833	0.8	0.769	1	0.571	0.833	0.75	1
Korea, Rep.	KOR	2019	100	93.4	75.6188	82.4	90	88.2837	1	1	0.802	1	0.691667	0.8175	1	0.522	1	1	1	0.296	1	0.9	1	1	1	1	1	1	1	0.874	0.926	0.804	0.481	0.926	0.802	1	0.857	0.8	0.952	0.455	0.286	0.8	1	0.571	1	0.667	0.667	1	1
Australia	AUS	2019	100	92.6667	74.075	74.4667	100	88.2417	1	1	0.78	1	0.699667	0.7545	1	0.5635	0.666667	1	1	0.312	1	1	1	1	1	1	1	1	1	0.963	0.411	0.599	0.976	0.952	0.78	1	0.857	0.778	0.9	0.455	0.375	0.833	0.8	0.769	0.875	0.5	0.833	0.75	1
Netherlands	NLD	2019	100	98.5	71.3625	69.9167	100	87.9558	1	1	0.955	1	0.736	0.7595	0.6945	0.528	0.666667	0.8	1	0.33	1	1	1	1	1	1	1	1	1	1	1	0.775	1	1	0.955	1	0.714	0.8	0.857	0.545	0.5	1	0.8	0.769	1	0.571	0.667	0.75	0.889
Mexico	MEX	2019	100	92.9333	89.3187	80.2833	75	87.5071	1	1	0.788	1	0.907167	0.8835	1	0.7735	0.833333	0.934	1	0.444	1	0.75	1	1	1	1	1	1	1	0.963	0.83	0.841	0.826	0.481	0.788	1	1	1	1	0.818	0.625	1	1	0.923	0.778	0.6	1	1	1
Germany	DEU	2019	100	96.4667	71.1063	74.9167	95	87.4979	1	1	0.894	1	0.6965	0.748833	0.75	0.6025	0.666667	0.934	1	0.396	1	0.95	1	1	1	1	1	1	1	1	1	0.651	0.821	1	0.894	1	0.714	0.8	0.857	0.6	0.375	0.833	0.8	0.714	1	0.429	0.8	0.75	1
Canada	CAN	2019	100	93.2	60.0125	84.1167	100	87.4658	1	1	0.796	1	0.568333	0.6775	0.5	0.5635	0.666667	1	1	0.698	1	1	1	1	1	1	1	1	1	0.915	0.967	0.651	0.967	0.481	0.796	1	0.429	0.8	0.9	0.364	0.25	0.667	0.8	0.615	1	0.5	0.4	0.75	1
Ireland	IRL	2019	100	94.7333	74.1125	66.3417	100	87.0375	1	1	0.842	1	0.699167	0.7615	1	0.547	0.666667	0.866	1	0.121	1	1	1	1	1	1	1	1	1	0.963	0.963	0.798	0.524	0.963	0.842	1	1	0.8	0.857	0.455	0.25	0.833	0.8	0.615	1	0.571	0.833	0.75	1
Switzerland	CHE	2019	100	87.6667	76.55	80.8583	90	87.015	1	1	0.63	1	0.739167	0.7625	1	0.619	0.833333	1	1	0.401	1	0.9	1	1	1	1	1	1	1	0.981	0.644	0.699	0.804	0.019	0.63	1	1	0.7	0.857	0.545	0.5	0.833	0.8	0.692	1	0.5	0.833	0.75	1
France	FRA	2019	100	90.8	74.3	66.6417	100	86.3483	1	1	0.724	1	0.721333	0.750667	1	0.528	0.666667	0.934	1	0.065	1	1	1	1	1	1	1	1	1	0.708	0.614	0.472	0.858	0.967	0.724	1	1	0.8	0.9	0.545	0.25	0.833	0.8	0.692	1	0.429	0.833	0.75	1
Denmark	DNK	2019	90	98.7	68.0187	73.8667	100	86.1171	0.9	1	0.961	1	0.6945	0.711833	0.6945	0.528	0.666667	0.866	1	0.422	1	1	1	1	1	1	0.5	1	1	1	1	0.803	1	1	0.961	1	0.714	0.8	0.9	0.545	0.375	0.833	0.8	0.692	1	0.429	0.6	0.75	0.889
Estonia	EST	2019	100	93.9333	67.4938	68.9417	100	86.0738	1	1	0.818	1	0.701667	0.709167	0.639	0.528	0.666667	0.866	1	0.225	1	1	1	1	1	1	1	1	1	0.963	0.963	0.769	0.963	0.434	0.818	1	0.857	0.7	0.9	0.545	0.375	0.833	0.8	0.538	1	0.5	0.667	0.75	0.778
Japan	JPN	2019	90	90.5333	73.5125	80	95	85.8092	0.9	1	0.716	1	0.675	0.756833	1	0.5855	1	0.734	1	0.466	1	0.95	1	1	1	1	0.5	1	1	0.963	0.844	0.375	0.481	0.915	0.716	1	0.857	0.667	0.9	0.364	0.429	0.833	0.8	0.769	0.889	0.5	0.833	0.75	1
Slovak Republic	SVK	2019	90	94.9333	69.95	73.0917	100	85.595	0.9	1	0.848	1	0.678667	0.735833	0.75	0.6025	0.666667	0.934	1	0.323	1	1	1	1	1	1	0.5	1	1	0.943	1	0.792	0.576	0.929	0.848	1	0.714	0.7	0.905	0.545	0.375	0.833	0.8	0.769	1	0.429	0.667	0.75	1
Portugal	PRT	2019	100	90.7667	71.0375	65.7917	100	85.5192	1	1	0.723	1	0.716167	0.770833	0.75	0.472	0.666667	0.866	1	0.099	1	1	1	1	1	1	1	1	1	1	0.905	0.845	0.867	0	0.723	1	0.714	0.8	0.905	0.545	0.5	0.833	0.8	0.846	1	0.429	0.8	0.75	1
Greece	GRC	2019	100	87.5	68.5375	70.7667	100	85.3608	1	1	0.625	1	0.670667	0.724667	0.75	0.547	0.666667	1	1	0.164	1	1	1	1	1	1	1	1	1	0.471	0.674	0.378	0.642	0.963	0.625	1	0.714	0.7	0.857	0.545	0.375	0.833	0.8	0.769	1	0.429	0.6	0.75	1
New Zealand	NZL	2019	100	91.6333	71.5187	63.1667	100	85.2638	1	1	0.749	1	0.652333	0.733667	1	0.5635	0.666667	0.8	1	0.06	1	1	1	1	1	1	1	1	1	0.77	0.926	0.628	0.537	0.884	0.749	1	0.714	0.625	0.905	0.545	0.125	1	0.8	0.769	1	0.5	0.833	0.5	1
Czech Republic	CZE	2019	90	90.1	74.5875	75.6167	95	85.0608	0.9	1	0.703	1	0.703333	0.776333	1	0.528	0.666667	0.934	1	0.424	1	0.95	1	1	1	1	0.5	1	1	0.963	0.963	0.497	0.613	0.481	0.703	1	1	0.7	0.857	0.455	0.375	0.833	0.8	0.846	1	0.429	0.833	0.75	1
Lithuania	LTU	2019	100	91.8333	60.9688	71.8667	100	84.9338	1	1	0.755	1	0.653833	0.666333	0.389	0.528	0.666667	0.866	1	0.342	1	1	1	1	1	1	1	1	1	0.981	1	0.934	0.812	0.048	0.755	1	0.571	0.7	0.857	0.545	0.25	1	0.8	0.615	1	0.5	0.333	0.75	0.778
Hungary	HUN	2019	100	86.8667	69.0375	68.2667	100	84.8342	1	1	0.606	1	0.697	0.7365	0.6945	0.528	0.666667	0.934	1	0.13	1	1	1	1	1	1	1	1	1	0.859	0.859	0.511	0.775	0.024	0.606	1	0.571	0.7	0.9	0.636	0.375	1	0.8	0.769	1	0.5	0.6	0.75	0.889
Turkey	TUR	2019	100	84	86.0812	53.1083	100	84.6379	1	1	0.52	1	0.804667	0.915333	1	0.7265	0.333333	0.666	1	0.125	1	1	1	1	1	1	1	1	1	0.768	0.052	0.434	0.548	0.801	0.52	1	1	0.9	1	0.636	0.625	0.667	1	0.692	1	0.8	1	1	1
Latvia	LVA	2019	100	89.1667	61.3875	68.0417	100	83.7192	1	1	0.675	1	0.670667	0.660667	0.389	0.528	0.666667	0.934	1	0.121	1	1	1	1	1	1	1	1	1	0.886	0.905	0.792	0.76	0.033	0.675	1	0.571	0.8	0.9	0.545	0.375	0.833	0.8	0.692	0.889	0.5	0.333	0.75	0.778
United Kingdom	GBR	2019	100	86.8	74.025	64.9417	90	83.1533	1	1	0.604	1	0.717	0.766333	1	0.472	0.666667	0.866	1	0.065	1	0.9	1	1	1	1	1	1	1	0.775	0.384	0.35	0.738	0.775	0.604	1	0.857	0.8	0.857	0.455	0.5	0.833	0.8	0.786	1	0.429	0.833	0.75	1
Chile	CHL	2019	100	76.9667	80.6937	59.525	95	82.4371	1	1	0.309	1	0.77	0.867	1	0.5445	0.5	0.6	1	0.281	1	0.95	1	1	1	1	1	1	1	0.496	0.588	0.079	0.382	0	0.309	1	1	0.8	0.9	0.545	0.375	1	1	0.846	0.889	0.667	0.8	1	1
Belgium	BEL	2019	100	83.9333	62.225	65.9167	100	82.415	1	1	0.518	1	0.645667	0.671	0.5	0.528	0.666667	0.8	1	0.17	1	1	1	1	1	1	1	1	1	0.706	0.617	0.578	0.407	0.28	0.518	1	0.571	0.7	0.85	0.545	0.375	0.833	0.8	0.714	1	0.429	0.333	0.75	1
Bulgaria	BGR	2019	100	90.1	60.675	70.8417	90	82.3233	1	1	0.703	1	0.591333	0.572833	0.8335	0.528	0.666667	0.934	1	0.233	1	0.9	1	1	1	1	1	1	1	0.863	0.745	0.623	0.821	0.463	0.703	1	0.857	0.6	0.81	0.364	0.25	0.667	0.6	0.462	0.625	0.333	0.667	0.75	0.667
Armenia	ARM	2019	100	84.9667	81.225	59.9417	85	82.2267	1	1	0.549	1	0.8225	0.787833	0.9445	0.7225	0.666667	0.6	1	0.131	1	0.85	1	1	1	1	1	1	1	0.715	0.746	0.612	0.671	0	0.549	1	1	0.889	0.952	0.636	0.625	0.833	0.933	0.769	0.625	0.6	0.8	1	0.889
Cyprus	CYP	2019	100	92.2667	53.3312	73.3083	85	80.7812	1	1	0.768	1	0.535667	0.539833	0.5835	0.4565	0.833333	1	1	0.099	1	0.85	1	1	1	1	1	1	1	0.878	0.721	0.467	0.841	0.933	0.768	1	0.571	0.6	0.762	0.364	0.25	0.667	0.8	0.385	0.625	0.429	0.5	0.5	0.667
Georgia	GEO	2019	100	86.4667	73.7188	60.1167	80	80.0604	1	1	0.594	1	0.756167	0.664667	0.9445	0.6905	0.666667	0.6	1	0.138	1	0.8	-99	1	1	1	1	1	1	0.73	0.919	0.606	0.713	0	0.594	1	1	0.667	0.95	0.545	0.375	1	0.8	0.538	0.75	0.6	0.8	0.5	0.889
Costa Rica	CRI	2019	100	86.4667	75.9562	66.4667	70	79.7779	1	1	0.594	1	0.7645	0.725333	0.9445	0.6625	0.666667	0.8	1	0.192	1	0.7	1	1	1	1	1	1	1	0.716	0.732	0.349	0.548	0.624	0.594	1	1	0.667	1	0.545	0.375	1	0.933	0.769	0.75	0.6	0.8	0.5	0.889
Moldova	MDA	2019	100	94.2333	53.5625	58.8167	90	79.3225	1	1	0.827	1	0.590667	0.489667	0.4445	0.5995	0.666667	0.466	1	0.22	1	0.9	0	1	1	1	1	1	1	0.933	0.933	0.777	0.654	0.838	0.827	1	0.571	0.625	0.81	0.455	0.25	0.833	0.6	0.538	0.75	0.6	0.2	0.25	0.889
Kyrgyz Republic	KGZ	2019	100	81.4667	73.6375	53.0583	85	78.6325	1	1	0.444	1	0.769833	0.656667	0.9445	0.667	0.333333	0.466	1	0.323	0	0.85	1	1	1	1	1	1	1	0.533	0.463	0.349	0.43	0.448	0.444	1	1	0.778	0.905	0.636	0.5	0.8	0.8	0.615	0.625	0.6	0.8	0.5	0.889
Kazakhstan	KAZ	2019	100	82.1333	78.3125	62.35	70	78.5592	1	1	0.464	1	0.805667	0.719167	0.9445	0.746	0.5	0.6	1	0.394	1	0.7	1	1	1	1	1	1	1	0.896	0.463	0.468	0.49	0	0.464	1	1	0.778	0.905	0.818	0.5	0.833	0.933	0.615	0.75	0.6	0.667	0.75	0.889
Luxembourg	LUX	2019	80	90.4333	61.2812	59.2917	100	78.2013	0.8	1	0.713	1	0.631833	0.678167	0.4445	0.528	0.666667	0.666	1	0.039	1	1	1	1	0	1	1	1	1	0.774	0.793	0.652	0.571	0.774	0.713	1	0.571	0.7	0.857	0.455	0.375	0.833	0.8	0.615	1	0.571	0.333	0.75	0.889
Russian Federation	RUS	2019	93.4	83.6667	58.5187	65.3667	90	78.1904	0.934	1	0.51	1	0.529	0.5845	0.8335	0.5075	0.666667	0.668	1	0.28	1	0.9	1	1	1	0.67	1	1	1	0.505	0.568	0.382	0.548	0.548	0.51	1	0.714	0.556	0.714	0.273	0.25	0.667	0.6	0.615	0.625	0.5	0.667	0.5	0.667
Israel	ISR	2019	100	85.7333	58.4625	46.4833	100	78.1358	1	1	0.572	1	0.588	0.665333	0.389	0.528	0.333333	0.466	1	0.06	1	1	1	1	1	1	1	1	1	0.859	0.812	0.368	0.448	0.372	0.572	1	0.429	0.75	0.762	0.545	0.375	0.667	0.8	0.692	0.75	0.667	0.333	0.75	0.778
Iceland	ISL	2019	80	87.8	59.7	61.6667	100	77.8333	0.8	1	0.634	1	0.618167	0.612	0.5	0.5855	0.666667	0.8	1	0	1	1	1	1	0	1	1	1	1	0.915	0.915	0.84	0.5	0	0.634	1	0.571	0.8	0.857	0.273	0.375	0.833	0.8	0.538	1	0.667	0.167	0.5	1
Romania	ROU	2019	90	87.1667	56.7313	73.6417	80	77.5079	0.9	1	0.615	1	0.576	0.547833	0.5835	0.5835	0.666667	0.934	1	0.345	1	0.8	1	1	1	1	0.5	1	1	0.789	0.889	0.614	0.751	0.033	0.615	1	0.857	0.556	0.762	0.364	0.25	0.667	0.6	0.462	0.625	0.5	0.6	0.5	0.667
Belarus	BLR	2019	100	79.2333	67.8812	53.5583	85	77.1346	1	1	0.377	1	0.721167	0.657667	0.639	0.655	0.333333	0.468	1	0.341	1	0.85	1	1	1	1	1	1	1	0.344	0.748	0.268	0.524	0	0.377	1	0.714	0.667	0.81	0.636	0.5	1	0.8	0.571	0.625	0.6	0.6	0.75	0.778
Brazil	BRA	2019	90	83.3	73.0938	62.375	75	76.7537	0.9	1	0.499	1	0.699667	0.787833	0.6945	0.6905	0.5	0.6	1	0.395	-99	0.75	-99	1	1	1	1	0.5	1	0.897	0.578	0.515	0.505	0	0.499	1	0.714	0.7	0.9	0.455	0.429	1	0.933	0.769	0.625	0.6	0.8	1	0.889
Mongolia	MNG	2019	100	80	77.475	63.9417	60	76.2833	1	0.5	0.9	1	0.8485	0.661833	0.9445	0.7225	0.666667	0.6	1	0.291	1	0.6	1	1	1	1	1	1	0.5	0.939	0.963	0.939	0.695	0.963	0.9	1	0.857	0.9	0.857	0.727	0.75	1	0.8	0.615	0.556	0.5	1	0.5	0.889
Thailand	THA	2019	100	76.4667	76.2375	57.85	70	76.1108	1	1	0.294	1	0.7495	0.710833	0.9445	0.7735	1	0.732	0.5	0.082	1	0.7	1	1	1	1	1	1	1	0	0.896	0.079	0.496	0	0.294	1	0.857	1	0.857	0.545	0.571	0.667	0.8	0.615	0.75	0.6	1	0.5	0.889
Mauritius	MUS	2019	100	86.2	56.9937	66.375	70	75.9137	1	1	0.586	1	0.550167	0.609833	0.4445	0.635	1	0.534	1	0.121	1	0.7	1	1	1	1	1	1	1	0.796	0.693	0.369	0.571	0.5	0.586	1	0.429	0.6	0.81	0.545	0.25	0.667	0.8	0.692	0.75	0.5	0.167	0.75	0.889
Serbia	SRB	2019	100	67.3667	68.4313	63.1667	80	75.7929	1	0.5	0.521	1	0.698667	0.618667	0.9445	0.578	0.666667	0.8	1	0.06	1	0.8	1	1	1	1	1	1	0.5	0.483	0.753	0.402	0.542	0.424	0.521	1	1	0.6	0.762	0.455	0.375	1	0.6	0.462	0.75	0.6	0.8	0.5	0.889
Philippines	PHL	2019	100	88.2667	75.175	80.175	35	75.7233	1	1	0.648	1	0.790333	0.650833	0.9445	0.746	1	1	1	0.207	1	0.35	-99	1	1	1	1	1	1	0.751	1	0.471	0.5	0.519	0.648	1	0.857	0.9	0.905	0.455	0.625	1	0.8	0.538	0.667	0.6	0.8	0.5	0.889
Albania	ALB	2019	100	69.7667	72.7062	59.4417	75	75.3829	1	0.5	0.593	1	0.783	0.629833	0.9445	0.6335	0.666667	0.534	1	0.177	1	0.75	0	1	1	1	1	1	0.5	0.804	0.933	0.717	0.509	0	0.593	1	0.714	0.9	0.857	0.727	0.5	1	0.8	0.462	0.5	0.6	0.667	0.75	0.889
Singapore	SGP	2019	100	100	42.1625	53.3333	80	75.0992	1	1	1	1	0.442	0.407	0.278	0.548	0.333333	0.8	1	0	1	0.8	1	1	1	1	1	1	1	1	1	1	1	1	1	1	0.143	0.375	0.762	0.455	0.25	0.667	0.8	0.308	0.5	0.167	0.167	0.5	0.556
Malta	MLT	2019	100	84	45.5	68.5917	75	74.6183	1	1	0.52	1	0.504667	0.463833	0.278	0.4565	0.666667	0.934	1	0.143	1	0.75	-99	1	1	1	1	1	1	0.251	0.714	0.35	0.573	0.714	0.52	1	0.429	0.556	0.762	0.364	0.25	0.667	0.6	0.462	0.625	0.429	0.167	0.5	0.556
Egypt, Arab Rep.	EGY	2019	100	76.8	72.6375	60.9167	60	74.0708	1	1	0.304	1	0.733	0.6775	0.9445	0.635	0.666667	0.6	1	0.17	1	0.6	0	1	1	1	1	1	1	0.056	0.896	0.128	0.439	0	0.304	1	1	0.667	0.857	0.636	0.571	0.667	0.8	0.615	0.75	0.6	0.8	0.5	0.889
Colombia	COL	2019	100	84.2667	83.1188	46.4417	55	73.7654	1	1	0.528	1	0.834167	0.800333	0.9445	0.8015	0.666667	0.934	0	0.257	1	0.55	0	1	1	1	1	1	1	0.893	0.18	0.332	0.775	0.463	0.528	1	1	0.889	1	0.545	0.571	1	0.933	0.769	0.75	0.6	1	0.75	0.889
South Africa	ZAF	2019	76.6	85.5	75.075	65.2	65	73.475	0.766	1	0.565	1	0.745667	0.719167	0.9445	0.667	0.5	0.8	1	0.308	1	0.65	0	0.5	1	0.33	1	1	1	0.442	0.794	0.397	0.434	0.76	0.565	1	0.714	0.9	0.905	0.455	0.5	1	0.8	0.615	0.75	0.4	1	0.75	0.889
Ecuador	ECU	2019	100	87.7333	76.425	55.5917	45	72.95	1	1	0.632	1	0.776833	0.7125	0.9445	0.7015	0.666667	0.8	0.5	0.257	0	0.45	1	1	1	1	1	1	1	0.732	0.783	0.41	0.646	0.588	0.632	1	1	0.7	0.95	0.636	0.375	1	0.933	0.692	0.5	0.6	0.8	0.75	0.889
Sri Lanka	LKA	2019	100	81.0333	70.4562	66.425	45	72.5829	1	1	0.431	1	0.724	0.636167	0.9445	0.6115	1	0.532	1	0.125	1	0.45	0	1	1	1	1	1	1	0.246	0.976	0.392	0.542	0	0.431	1	1	0.9	0.905	0.364	0.375	0.8	0.8	0.5	0.75	0.6	0.667	0.5	0.889
Ukraine	UKR	2019	100	46.0667	67.3375	49.0167	100	72.4842	1	1	0.382	0	0.6635	0.6175	0.9445	0.5995	0.166667	0.734	1	0.06	0	1	1	1	1	1	1	1	1	0.328	0.878	0.269	0.435	0	0.382	0	1	0.7	0.667	0.364	0.25	1	0.6	0.538	0.667	0.6	0.8	0.5	0.889
Indonesia	IDN	2019	100	87.3333	74.8875	43.7917	55	72.2025	1	1	0.62	1	0.730833	0.733	0.9445	0.655	0.666667	0.8	0	0.285	1	0.55	0	1	1	1	1	1	1	0.585	0.849	0.458	0.377	0.83	0.62	1	1	0.778	0.8	0.545	0.429	0.833	0.933	0.615	0.75	0.6	1	0.5	0.889
North Macedonia	MKD	2019	100	88.0667	51.1437	55.9833	65	72.0387	1	1	0.642	1	0.592	0.431	0.4445	0.578	0.333333	0.802	1	0.104	1	0.65	1	1	1	1	1	1	1	0.893	0.952	0.642	0.675	0.048	0.642	1	0.571	0.556	0.762	0.455	0.375	0.833	0.6	0.286	0.75	0.5	0.2	0.25	0.889
Malaysia	MYS	2019	80	84.0333	73.0187	68.2	50	71.0504	0.8	1	0.521	1	0.758667	0.655333	0.9445	0.655	1	0.532	1	0.196	-99	0.5	-99	1	1	0	1	1	1	0.859	0.859	0.44	0.43	0.019	0.521	1	1	0.9	0.857	0.545	0.25	1	0.8	0.615	0.75	0.6	0.667	0.5	0.889
West Bank and Gaza	PSE	2019	80	86.5667	55.6812	69.9	60	70.4296	0.8	1	0.597	1	0.518333	0.477667	0.9445	0.522	1	0.934	0.5	0.362	1	0.6	1	1	0	1	1	1	1	0.251	0.915	0.43	0.471	0.915	0.597	1	1	0.5	0.238	0.455	0.25	0.667	0.6	0.5	0.333	0.333	0.6	0.5	0.889
India	IND	2019	80	87.9667	59.9937	68.875	55	70.3671	0.8	1	0.639	1	0.622667	0.595167	0.4445	0.7015	1	0.866	0.5	0.389	1	0.55	0	0	1	1	1	1	1	0.963	0.784	0.387	0.647	0.415	0.639	1	0.286	0.9	0.762	0.455	0.5	0.833	0.933	0.538	0.75	0.4	0.2	0.75	0.889
Peru	PER	2019	90	85.7667	77.3312	51.1333	40	68.8462	0.9	1	0.573	1	0.806833	0.699667	0.9445	0.7225	0.833333	1	0	0.212	-99	0.4	-99	1	1	1	1	0.5	1	0.878	0.772	0.614	0.504	0.095	0.573	1	1	0.8	0.905	0.636	0.5	1	0.8	0.692	0.556	0.6	0.8	0.75	0.889
El Salvador	SLV	2019	90	79.9333	69.15	44.9333	60	68.8033	0.9	1	0.398	1	0.682167	0.708	0.6945	0.667	0.333333	0.334	1	0.13	0	0.6	0	1	1	1	1	0.5	1	0.415	0.781	0.32	0.472	0	0.398	1	0.857	0.556	0.85	0.455	0.375	1	0.933	0.615	0.75	0.6	0.6	0.75	0.889
Croatia	HRV	2019	80	50.7667	57.2875	63.8667	90	68.3842	0.8	1	0.523	0	0.598	0.5645	0.5835	0.512	0.666667	0.866	1	0.022	1	0.9	1	1	1	1	0	1	1	0.359	0.896	0.43	0.481	0.448	0.523	0	0.857	0.6	0.85	0.364	0.25	0.667	0.8	0.462	0.625	0.5	0.5	0.5	0.667
Azerbaijan	AZE	2019	80	64.6333	60.9813	55.0917	80	68.1412	0.8	0.5	0.439	1	0.622833	0.568	0.6945	0.6115	0.666667	0.334	1	0.203	-99	0.8	-99	0	1	1	1	1	0.5	0.934	0.398	0.52	0.343	0	0.439	1	0.429	0.667	0.81	0.545	0.286	1	0.8	0.5	0.625	0.4	0.333	0.75	0.889
Uganda	UGA	2019	100	64.2	74.7875	33.8667	65	67.5708	1	0.5	0.426	1	0.799	0.643667	0.9445	0.7105	0.666667	0.666	0	0.022	1	0.65	0	1	1	1	1	1	0.5	0.271	0.806	0.354	0.627	0.071	0.426	1	1	0.875	0.714	0.455	0.75	1	0.8	0.462	0.25	0.6	1	0.75	0.889
Rwanda	RWA	2019	100	72.4333	69.6188	49.4083	45	67.2921	1	0.5	0.673	1	0.761167	0.652167	0.6945	0.635	0.833333	1	0	0.143	-99	0.45	-99	1	1	1	1	1	0.5	0.589	0.963	0.325	0.542	0.943	0.673	1	0.857	0.778	0.762	0.545	0.625	1	0.8	0.538	0.625	0.6	0.6	0.75	0.889
Montenegro	MNE	2019	90	64.2667	67.1125	58.7167	55	67.0192	0.9	0.5	0.428	1	0.703333	0.560333	0.9445	0.6335	0.666667	0.6	1	0.082	-99	0.55	-99	1	1	1	0.5	1	0.5	0.752	0.41	0.26	0.717	0	0.428	1	1	0.7	0.857	0.455	0.375	0.833	0.6	0.462	0.75	0.5	0.8	0.25	0.889
Uruguay	URY	2019	100	83.9	65.9938	64.2333	20	66.8254	1	1	0.517	1	0.6175	0.6515	0.889	0.5835	0.833333	0.6	1	0.136	1	0.2	1	1	1	1	1	1	1	0.907	0.357	0.341	0.5	0.481	0.517	1	0.857	0.6	0.762	0.636	0.25	0.6	0.8	0.692	0.75	0.5	0.667	0.5	0.778
Vietnam	VNM	2019	100	64	55.0688	75.725	35	65.9587	1	0.5	0.42	1	0.5745	0.564667	0.4445	0.5435	1	0.8	1	0.229	-99	0.35	-99	1	1	1	1	1	0.5	0.557	0.697	0.551	0.293	0	0.42	1	0.571	0.8	0.571	0.455	0.25	0.8	0.8	0.538	0.75	0.6	0.2	0.5	0.889
Argentina	ARG	2019	70	79.4667	79.5875	58.925	35	64.5958	0.7	1	0.384	1	0.7615	0.823667	0.9445	0.667	0.5	0.732	1	0.125	0	0.35	1	0	1	1	0.5	1	1	0.793	0.177	0.382	0.566	0	0.384	1	1	0.9	0.95	0.636	0.25	0.833	1	0.692	0.75	0.5	1	1	0.889
Kuwait	KWT	2019	100	66.3333	51.6562	63.125	40	64.2229	1	0.5	0.49	1	0.5335	0.510667	0.528	0.472	0.5	0.8	1	0.225	1	0.4	1	1	1	1	1	1	0.5	0.821	0.896	0.269	0.462	0	0.49	1	0.429	0.667	0.8	0.455	0.25	0.6	1	0.231	0.5	0.333	0.5	0.5	0.556
Tunisia	TUN	2019	90	85.6667	64.8625	49.8083	30	64.0675	0.9	1	0.57	1	0.701333	0.593	0.6945	0.6115	0.333333	0.534	1	0.125	0	0.3	1	0.5	1	1	1	1	1	0.55	0.889	0.535	0.43	0.444	0.57	1	0.857	0.8	0.81	0.455	0.286	1	0.8	0.308	0.75	0.6	0.6	0.5	0.889
Dominican Republic	DOM	2019	100	65.6	59.9562	34.1417	60	63.9396	1	0.5	0.468	1	0.6625	0.558	0.4445	0.6905	0.666667	0.6	0	0.099	0	0.6	0	1	1	1	1	1	0.5	0.811	0.763	0.244	0.524	0	0.468	1	0.571	0.556	0.95	0.636	0.429	0.833	0.933	0.615	0.5	0.6	0.2	0.5	0.889
Myanmar	MMR	2019	100	67.0667	73.8063	42.9417	35	63.7629	1	0.5	0.512	1	0.755167	0.645833	0.9445	0.757	0.666667	0.734	0	0.317	-99	0.35	-99	1	1	1	1	1	0.5	0.586	0.867	0.656	0.452	0	0.512	1	1	0.889	0.762	0.455	0.625	0.8	0.8	0.692	0.75	0.333	0.8	0.5	0.889
Senegal	SEN	2019	80	81.0333	66.9188	39.9167	50	63.5737	0.8	1	0.431	1	0.719833	0.610833	0.6945	0.667	0.666667	0.734	0	0.196	1	0.5	0	0	1	1	1	1	1	0.071	0.91	0.253	0.528	0.395	0.431	1	0.571	0.8	0.762	0.636	0.75	0.8	0.8	0.615	0.75	0.4	0.6	0.5	0.889
Saudi Arabia	SAU	2019	80	60.7333	47.2188	78.975	50	63.3854	0.8	0.5	0.322	1	0.415833	0.51	0.5835	0.4165	1	0.868	1	0.291	1	0.5	1	1	0	1	1	1	0.5	0.52	0.538	0.263	0.288	0	0.322	1	0.286	0.333	0.762	0.364	0.25	0.5	0.8	0.385	0.375	0.333	0.667	0.5	0.667
Qatar	QAT	2019	100	61.9667	47.325	60.7667	45	63.0117	1	0.5	0.359	1	0.435833	0.498333	0.528	0.4555	0.666667	0.6	1	0.164	1	0.45	1	1	1	1	1	1	0.5	0.305	0.849	0.141	0.5	0	0.359	1	0.286	0.25	0.762	0.4	0.25	0.667	0.8	0.231	0.625	0.167	0.667	0.5	0.556
Bolivia	BOL	2019	100	68.5333	70.3812	54.3667	20	62.6562	1	0.5	0.556	1	0.7475	0.657	0.6945	0.7225	0.666667	0.734	0.5	0.274	0	0.2	0	1	1	1	1	1	0.5	0.76	0.849	0.741	0.43	0	0.556	1	0.857	0.8	0.95	0.545	0.5	0.833	0.933	0.615	0.444	0.6	0.6	0.75	0.889
Jordan	JOR	2019	80	80.8333	71.2938	47.925	30	62.0104	0.8	1	0.425	1	0.700333	0.652167	0.9445	0.7015	0.5	0.6	0.5	0.317	1	0.3	0	0	1	1	1	1	1	0.42	0.915	0.453	0.336	0	0.425	1	0.714	0.667	0.81	0.636	0.375	1	0.8	0.538	0.625	0.4	0.8	0.75	0.889
Ghana	GHA	2019	100	61.2667	65.1125	33.6	50	61.9958	1	0.5	0.338	1	0.693	0.645167	0.6945	0.5	0.5	0.534	0	0.31	-99	0.5	-99	1	1	1	1	1	0.5	0.167	0.867	0.206	0.452	0	0.338	1	0.857	0.667	0.714	0.545	0.375	1	0.933	0.538	0.5	0.6	0.8	0.5	0.889
Zimbabwe	ZWE	2019	90	59.9333	70.2375	43.0917	45	61.6525	0.9	0.5	0.298	1	0.669667	0.651667	0.9445	0.7105	0.666667	0.8	0	0.257	1	0.45	0	0.5	1	1	1	1	0.5	0.177	0.697	0.268	0.349	0	0.298	1	0.857	0.75	0.714	0.364	0.5	0.833	0.8	0.385	0.375	0.6	1	0.75	0.889
Bosnia and Herzegovina	BIH	2019	80	60.6667	58.1375	47.3833	60	61.2375	0.8	0.5	0.32	1	0.583167	0.619167	0.4445	0.5995	0.333333	0.534	1	0.028	1	0.6	1	0	1	1	1	1	0.5	0.081	0.826	0.269	0.424	0	0.32	1	0.429	0.556	0.9	0.364	0.25	1	0.8	0.615	0.75	0.4	0.4	0.75	0.889
Honduras	HND	2019	90	62.3667	66.8563	46.6583	40	61.1763	0.9	0.5	0.371	1	0.633833	0.695167	0.6945	0.667	0.333333	0.8	0.5	0.233	0	0.4	0	1	1	1	1	0.5	0.5	0.658	0.425	0.253	0.519	0	0.371	1	0.714	0.444	0.85	0.545	0.25	1	0.933	0.538	0.75	0.6	0.6	0.75	0.889
Paraguay	PRY	2019	70	63.0667	76.4313	40.7833	55	61.0562	0.7	0.5	0.392	1	0.791667	0.655333	0.9445	0.829	0.833333	0.668	0	0.13	0	0.55	0	1	0	1	1	0.5	0.5	0.198	0.872	0.232	0.49	0.167	0.392	1	1	0.8	0.905	0.545	0.5	1	0.8	0.615	0.75	0.6	0.667	0.5	0.889
Guatemala	GTM	2019	80	62.1	73.9313	54.1333	35	61.0329	0.8	0.5	0.363	1	0.774	0.630333	0.9445	0.757	0.333333	0.668	1	0.164	0	0.35	0	0	1	1	1	1	0.5	0.567	0.617	0.213	0.421	0	0.363	1	0.714	0.778	0.857	0.545	0.75	1	0.8	0.615	0.667	0.4	0.8	0.5	0.889
Togo	TGO	2019	90	59.8333	68.5438	41.025	45	60.8804	0.9	0.5	0.295	1	0.7185	0.601833	0.9445	0.578	1	0.466	0	0.175	1	0.45	0	0.5	1	1	1	1	0.5	0.244	0.62	0.296	0.314	0	0.295	1	1	0.889	0.667	0.455	0.5	0.8	0.8	0.286	0.625	0.6	0.8	0.5	0.889
Pakistan	PAK	2019	100	60.9667	73.2938	39.1167	30	60.6754	1	0.5	0.329	1	0.7525	0.690333	0.9445	0.5905	0.666667	0.6	0	0.298	1	0.3	1	1	1	1	1	1	0.5	0	0.889	0.288	0.468	0	0.329	1	1	0.889	0.762	0.364	0.5	1	0.8	0.692	0.75	0.6	0.8	0.5	0.889
United Arab Emirates	ARE	2019	100	36.8667	42.2375	54.2417	65	59.6692	1	0.5	0.606	0	0.434333	0.442667	0.222	0.526	0.666667	0.266	1	0.237	1	0.65	1	1	1	1	1	1	0.5	0.756	0.756	0.457	0.378	0.684	0.606	0	0.286	0.444	0.762	0.364	0.25	0.5	0.8	0.231	0.625	0.333	0.167	0.5	0.444
Panama	PAN	2019	80	62.8	65.2062	59.9167	30	59.5846	0.8	0.5	0.384	1	0.681667	0.631167	0.6945	0.5835	0.666667	0.466	1	0.264	1	0.3	0	1	0	1	1	1	0.5	0.532	0.763	0.163	0.461	0	0.384	1	0.857	0.7	0.905	0.545	0.25	0.833	0.8	0.462	0.625	0.6	0.8	0.5	0.889
Morocco	MAR	2019	60	88.4	68.1562	28.525	50	59.0162	0.6	1	0.652	1	0.708333	0.564167	0.9445	0.6905	0.5	0.466	0	0.175	0	0.5	1	0	0	1	1	1	1	0.461	0.933	0.467	0.467	0.933	0.652	1	0.714	0.8	0.905	0.545	0.286	1	0.8	0.385	0.5	0.4	0.8	0.5	0.889
Zambia	ZMB	2019	90	57.8	70.4625	36.8083	40	59.0142	0.9	0.5	0.234	1	0.720667	0.643667	0.9445	0.5995	0.333333	0.8	0	0.339	-99	0.4	-99	0.5	1	1	1	1	0.5	0.037	0.583	0.153	0.329	0.067	0.234	1	1	0.875	0.619	0.455	0.375	1	0.8	0.462	0.5	0.6	1	0.5	0.889
Belize	BLZ	2019	80	62.2667	55.7687	65.7417	30	58.7554	0.8	0.5	0.368	1	0.596333	0.527333	0.4445	0.646	0.666667	0.666	1	0.297	1	0.3	0	0	1	1	1	1	0.5	0.304	0.782	0.269	0.485	0	0.368	1	0.286	0.667	0.905	0.545	0.375	0.8	0.933	0.615	0.333	0.333	0.2	0.75	0.889
Oman	OMN	2019	100	44.4	44.0562	64.225	40	58.5363	1	0.5	0.832	0	0.516667	0.381333	0.3335	0.497	1	0.334	1	0.235	1	0.4	1	1	1	1	1	1	0.5	0.867	0.867	0.83	0.729	0.867	0.832	0	0.143	0.7	0.81	0.364	0.25	0.833	0.8	0.154	0.5	0.167	0.167	0.5	0.667
China	CHN	2019	83.4	46.4	59.675	36.6167	65	58.2183	0.834	1	0.392	0	0.597833	0.625	0.6945	0.411	0.666667	0.4	0	0.398	1	0.65	1	1	1	0.67	1	0.5	1	0	0.889	0.647	0.426	0	0.392	0	0.714	0.6	0.75	0.273	0.25	1	0.8	0.308	0.625	0.6	0.667	0.75	0.889
Tanzania	TZA	2019	76.6	60.7	68.7812	39.275	45	58.0712	0.766	0.5	0.321	1	0.714667	0.5935	0.9445	0.6335	0.5	0.868	0	0.203	1	0.45	1	0.5	1	0.33	1	1	0.5	0.105	0.771	0.343	0.386	0	0.321	1	0.857	0.9	0.667	0.364	0.5	1	0.8	0.286	0.375	0.6	1	0.5	0.889
Bangladesh	BGD	2019	90	61.6	68.975	44.775	25	58.07	0.9	0.5	0.348	1	0.7205	0.6535	0.6945	0.7015	0.5	0.666	0.5	0.125	0	0.25	1	0.5	1	1	1	1	0.5	0.113	0.896	0.183	0.546	0	0.348	1	0.714	0.889	0.8	0.545	0.375	1	0.933	0.538	0.5	0.6	0.6	0.75	0.889
Fiji	FJI	2019	80	59.5	52.9375	50.5667	45	57.6008	0.8	0.5	0.285	1	0.512167	0.501333	0.6945	0.5	0.666667	0.334	1	0.022	-99	0.45	-99	0.5	1	1	0.5	1	0.5	0.19	0.649	0.311	0.277	0	0.285	1	0.571	0.444	0.81	0.273	0.375	0.6	0.867	0.308	0.333	0.4	0.6	0.5	0.889
Botswana	BWA	2019	60	66.5667	65.3875	54.7917	40	57.3492	0.6	0.5	0.497	1	0.634667	0.609	0.9445	0.5555	0.666667	0.4	1	0.125	1	0.4	1	0.5	0	1	1	0.5	0.5	0.037	0.859	0.34	0.448	0.798	0.497	1	0.857	0.7	0.762	0.364	0.125	1	0.8	0.462	0.375	0.6	0.667	0.75	0.889
Samoa	WSM	2019	90	63.5	50.4188	36.3167	45	57.0471	0.9	0.5	0.405	1	0.472833	0.4735	0.6945	0.5	0.666667	0.534	0	0.252	1	0.45	1	0.5	1	1	1	1	0.5	0.302	0.896	0.216	0.43	0.18	0.405	1	0.429	0.556	0.571	0.364	0.25	0.667	0.8	0.308	0.333	0.4	0.5	0.5	0.889
Niger	NER	2019	90	61.9667	60.8375	37.275	35	57.0158	0.9	0.5	0.359	1	0.611167	0.4995	0.9445	0.5905	0.5	0.668	0	0.323	1	0.35	0	0.5	1	1	1	1	0.5	0.183	0.867	0.259	0.485	0	0.359	1	0.714	0.778	0.762	0.455	0.125	0.833	0.8	0.231	0.333	0.333	0.8	0.5	0.889
Iran, Islamic Rep.	IRN	2019	80	59.8	51.625	57.0167	35	56.6883	0.8	0.5	0.294	1	0.570667	0.509667	0.4445	0.4445	0.666667	0.4	1	0.214	1	0.35	1	1	0	1	1	1	0.5	0.16	0.754	0.137	0.421	0	0.294	1	0.429	0.444	0.81	0.455	0.286	1	0.8	0.308	0.75	0.5	0.2	0.5	0.889
Malawi	MWI	2019	90	61.2333	66.5438	34.675	30	56.4904	0.9	0.5	0.337	1	0.713	0.5615	0.9445	0.5555	0.5	0.734	0	0.153	-99	0.3	-99	0.5	1	1	1	1	0.5	0.207	0.599	0.225	0.315	0.339	0.337	1	1	0.9	0.714	0.364	0.5	0.8	0.933	0.286	0.25	0.6	0.8	0.5	0.889
Mozambique	MOZ	2019	80	57.6333	67.3937	36.175	40	56.2404	0.8	0.5	0.229	1	0.654167	0.605833	0.9445	0.667	1	0.268	0	0.179	-99	0.4	-99	0.5	1	1	1	0.5	0.5	0.132	0.617	0.061	0.334	0	0.229	1	0.714	0.8	0.714	0.364	0.5	0.833	0.8	0.385	0.75	0.4	0.8	0.5	0.889
Cambodia	KHM	2019	70	59.2	60.4375	46.375	45	56.2025	0.7	0.5	0.276	1	0.549167	0.638	0.6945	0.579	1	0.734	0	0.121	1	0.45	0	0	1	1	1	0.5	0.5	0.205	0.572	0.262	0.338	0	0.276	1	0.571	0.444	0.7	0.455	0.125	1	0.933	0.462	0.75	0.333	0.6	0.75	0.889
Cote d'Ivoire	CIV	2019	90	59.9	68.475	37.1667	25	56.1083	0.9	0.5	0.297	1	0.733667	0.612167	0.6945	0.746	0.666667	0.734	0	0.086	1	0.25	0	0.5	1	1	1	1	0.5	0.171	0.612	0.353	0.348	0	0.297	1	0.857	0.667	0.762	0.545	0.571	1	0.933	0.615	0.625	0.4	0.6	0.5	0.889
Tajikistan	TJK	2019	90	31.3667	65.4938	41.9417	50	55.7604	0.9	0.5	0.441	0	0.6655	0.557	0.9445	0.6275	0.666667	0.468	0.5	0.043	1	0.5	0	0.5	1	1	1	1	0.5	0.389	0.542	0.439	0.387	0.448	0.441	0	1	0.625	0.762	0.273	0.5	0.833	0.8	0.286	0.556	0.4	0.8	0.5	0.889
Lesotho	LSO	2019	80	63.2667	53.1938	39.6667	40	55.2254	0.8	0.5	0.398	1	0.578167	0.451333	0.4445	0.7225	0.666667	0.734	0	0.186	-99	0.4	-99	0	1	1	1	1	0.5	0.228	0.782	0.396	0.583	0	0.398	1	0.429	0.778	0.667	0.545	0.25	0.8	0.8	0.308	0.5	0.4	0.2	0.5	0.889
Algeria	DZA	2019	70	60.1333	57.3625	48.25	40	55.1492	0.7	0.5	0.304	1	0.484	0.610333	0.6945	0.6115	0.5	0.266	1	0.164	1	0.4	1	0	1	1	0.5	1	0.5	0.099	0.68	0.317	0.402	0.024	0.304	1	0.429	0.444	0.75	0.364	0.25	0.667	0.8	0.462	0.75	0.4	0.5	0.75	0.889
Angola	AGO	2019	80	57.3	68.5625	28.8667	40	54.9458	0.8	0.5	0.219	1	0.691167	0.636	0.9445	0.559	0.666667	0.466	0	0.022	-99	0.4	-99	0.5	1	1	1	0.5	0.5	0.076	0.546	0.221	0.254	0	0.219	1	0.857	0.778	0.667	0.545	0.5	0.8	0.933	0.308	0.625	0.4	0.8	0.75	0.889
Uzbekistan	UZB	2019	70	56	50.125	33.425	65	54.91	0.7	0.5	0.18	1	0.52	0.505833	0.4445	0.488	0	0.266	1	0.071	1	0.65	1	0	1	1	1	0.5	0.5	0.119	0.45	0.183	0.151	0	0.18	1	0.286	0.75	0.762	0.364	0.125	0.833	0.8	0.385	0.75	0.4	0.2	0.5	0.889
Cabo Verde	CPV	2019	80	59.3333	59.5938	54.4167	20	54.6688	0.8	0.5	0.28	1	0.595833	0.595167	0.6945	0.5	0.666667	0.4	1	0.11	1	0.2	1	0	1	1	1	1	0.5	0.393	0.314	0.25	0.443	0	0.28	1	0.857	0.556	0.857	0.455	0.25	0.6	0.8	0.538	0.333	0.4	0.5	1	0.889
Jamaica	JAM	2019	60	73.7333	52.8813	56.6	30	54.6429	0.6	0.5	0.712	1	0.533833	0.505833	0.4445	0.667	0.5	0.6	1	0.164	0	0.3	0	0	0	1	1	1	0.5	0.599	0.91	0.609	0.604	0.838	0.712	1	0.286	0.444	0.81	0.455	0.375	0.833	0.8	0.385	0.5	0.4	0.2	0.75	0.889
Kenya	KEN	2019	70	60.4667	61.4312	35.7917	45	54.5379	0.7	0.5	0.314	1	0.618833	0.5655	0.6945	0.667	0.666667	0.534	0	0.231	-99	0.45	-99	0	1	1	1	0.5	0.5	0.052	0.886	0.15	0.485	0	0.314	1	0.857	0.7	0.667	0.364	0.125	1	0.933	0.385	0.375	0.4	0.8	0.5	0.889
Bahrain	BHR	2019	90	64.2667	41.6	46.4667	30	54.4667	0.9	0.5	0.428	1	0.4305	0.4455	0.278	0.422	0.666667	0.066	1	0.126	-99	0.3	-99	1	1	1	1	0.5	0.5	0.604	0.783	0.314	0.439	0	0.428	1	0.143	0.375	0.8	0.455	0.143	0.667	1	0.214	0.375	0.167	0.167	0.75	0.556
Lao PDR	LAO	2019	90	56.6333	53.3937	40.5333	30	54.1121	0.9	0.5	0.199	1	0.586167	0.467167	0.4445	0.667	0.833333	0.6	0	0.188	-99	0.3	-99	0.5	1	1	1	1	0.5	0.037	0.576	0.037	0.345	0	0.199	1	0.286	0.625	0.762	0.636	0.375	0.833	0.933	0.462	0.375	0.333	0.2	0.5	0.889
Burkina Faso	BFA	2019	80	59.5667	62.025	31.525	35	53.6233	0.8	0.5	0.287	1	0.605667	0.566833	0.9445	0.5	0.5	0.532	0	0.229	-99	0.35	-99	0	1	1	1	1	0.5	0.019	0.763	0.273	0.381	0	0.287	1	0.714	0.778	0.762	0.455	0.125	0.8	0.8	0.385	0.333	0.333	0.8	0.75	0.889
Ethiopia	ETH	2019	90	59.9667	71.4125	31.6167	15	53.5992	0.9	0.5	0.299	1	0.773167	0.6125	0.9445	0.6115	0.166667	0.934	0	0.164	-99	0.15	-99	0.5	1	1	1	1	0.5	0	0.726	0.273	0.494	0	0.299	1	1	0.9	0.75	0.364	0.625	1	0.933	0.286	0.556	0.6	0.8	0.5	0.889
Nigeria	NGA	2019	80	62.4	54.8438	30.6333	40	53.5754	0.8	0.5	0.372	1	0.591833	0.499167	0.4445	0.67	0.333333	0.532	0	0.36	-99	0.4	-99	0	1	1	1	1	0.5	0.214	0.867	0.339	0.439	0	0.372	1	0.286	0.778	0.714	0.273	0.5	1	0.8	0.462	0.333	0.5	0.4	0.5	0.889
Nepal	NPL	2019	80	61.3333	68.0375	38.4583	20	53.5658	0.8	0.5	0.34	1	0.740833	0.554833	0.9445	0.6115	0.833333	0.666	0	0.039	0	0.2	0	0	1	1	1	1	0.5	0.048	0.83	0.269	0.555	0	0.34	1	0.714	0.889	0.762	0.455	0.625	1	0.8	0.385	0.444	0.4	0.8	0.5	0.889
Cameroon	CMR	2019	80	61.5667	64.525	26.2917	35	53.4767	0.8	0.5	0.347	1	0.579167	0.6155	0.9445	0.6335	0.166667	0.6	0	0.285	0	0.35	0	0.5	1	1	1	0.5	0.5	0.207	0.843	0.296	0.391	0	0.347	1	0.714	0.667	0.714	0.455	0.125	0.8	0.8	0.385	0.375	0.333	0.8	1	0.889
Maldives	MDV	2019	70	29.8667	65.4875	49.1333	50	52.8975	0.7	0.5	0.396	0	0.721	0.532167	0.889	0.5905	0.333333	0.468	1	0.164	1	0.5	0	0	1	1	1	0.5	0.5	0.641	0.763	0.142	0.433	0	0.396	0	1	0.375	0.857	0.636	0.625	0.833	0.8	0.385	0.375	0.333	0.8	0.5	0.778
Sierra Leone	SLE	2019	90	65.2333	62.05	26.6083	20	52.7783	0.9	0.5	0.457	1	0.669167	0.513167	0.6945	0.7225	0.333333	0.466	0	0.265	0	0.2	0	0.5	1	1	1	1	0.5	0	0.83	0.391	0.651	0.415	0.457	1	0.714	0.667	0.714	0.545	0.375	1	0.8	0.357	0.222	0.6	0.6	0.5	0.889
Namibia	NAM	2019	70	63.0667	65.4625	32.5417	30	52.2142	0.7	0.5	0.392	1	0.6215	0.635333	0.9445	0.522	0.666667	0.4	0	0.235	-99	0.3	-99	0.5	1	0	1	1	0.5	0.316	0.745	0.415	0.485	0	0.392	1	0.857	0.7	0.667	0.455	0.25	0.8	0.8	0.462	0.5	0.5	0.8	0.75	0.889
Bhutan	BTN	2019	80	59.2333	67.7812	37.9417	15	51.9913	0.8	0.5	0.277	1	0.7145	0.585167	0.9445	0.579	0.666667	0.534	0	0.317	0	0.15	1	1	0	1	1	1	0.5	0.042	0.793	0.098	0.452	0	0.277	1	1	0.667	0.7	0.545	0.375	1	0.933	0.286	0.375	0.5	0.667	0.75	0.889
Madagascar	MDG	2019	90	56.3	62.5938	21.0083	30	51.9804	0.9	0.5	0.189	1	0.645667	0.588167	0.6945	0.6115	0.333333	0.468	0	0.039	1	0.3	0	0.5	1	1	1	1	0.5	0	0.512	0.194	0.238	0	0.189	1	0.571	0.778	0.714	0.636	0.375	0.8	0.933	0.538	0.625	0.333	0.6	0.5	0.889
Mali	MLI	2019	66.6	63.1	64.2313	35.7083	30	51.9279	0.666	0.5	0.393	1	0.7045	0.565667	0.639	0.689	0.333333	0.866	0	0.229	1	0.3	0	0	1	0.33	1	1	0.5	0.32	0.782	0.387	0.31	0.167	0.393	1	0.571	0.8	0.762	0.636	0.625	0.833	0.8	0.538	0.556	0.4	0.6	0.5	0.778
Lebanon	LBN	2019	60	62.6	57.3937	49.3583	30	51.8704	0.6	0.5	0.378	1	0.5815	0.462167	0.9445	0.516	0.333333	0.4	1	0.241	-99	0.3	-99	0	0	1	1	1	0.5	0.702	0.607	0.225	0.358	0	0.378	1	0.714	0.667	0.619	0.364	0.125	1	0.6	0.231	0.375	0.4	0.667	0.5	0.889
Nicaragua	NIC	2019	90	60.0333	45.3813	27.875	35	51.6579	0.9	0.5	0.301	1	0.419667	0.4385	0.4445	0.6115	0.5	0.468	0	0.147	-99	0.35	-99	0.5	1	1	1	1	0.5	0.262	0.65	0.161	0.433	0	0.301	1	0.429	0.444	0.762	0.091	0.125	0.667	0.8	0.231	0.5	0.4	0.2	0.5	0.889
Timor-Leste	TLS	2019	50	58.2333	59.2687	32.7083	55	51.0421	0.5	0.5	0.247	1	0.6015	0.498833	0.6945	0.746	0.333333	0.734	0	0.241	0	0.55	-99	0.5	0	0	1	1	0.5	0	0.649	0.131	0.457	0	0.247	1	0.571	0.444	0.714	0.455	0.625	0.8	0.8	0.385	0.375	0.333	0.6	0.5	0.889
Burundi	BDI	2019	70	61.7	68.9	18.9667	35	50.9133	0.7	0.5	0.351	1	0.697333	0.591333	0.9445	0.7015	0.166667	0.4	0	0.192	1	0.35	0	0	1	1	1	0.5	0.5	0.085	0.83	0.343	0.496	0	0.351	1	0.714	0.667	0.8	0.545	0.625	0.833	0.933	0.357	0.375	0.333	0.8	0.75	0.889
St. Lucia	LCA	2019	80	55.9333	45.9875	47.5	25	50.8842	0.8	0.5	0.178	1	0.490167	0.409833	0.4445	0.5345	0.5	0.4	1	0	-99	0.25	-99	0	1	1	1	1	0.5	0.024	0.554	0.289	0.024	0	0.178	1	0.571	0.5	0.714	0.364	0.125	0.667	0.8	0.154	0.222	0.333	0.2	0.75	0.889
Suriname	SUR	2019	60	62.4333	46.6313	49.95	35	50.8029	0.6	0.5	0.373	1	0.462333	0.4385	0.4445	0.5835	0.5	0.334	1	0.164	1	0.35	1	0	1	0	1	1	0.5	0.329	0.775	0.387	0.35	0.024	0.373	1	0.143	0.444	0.857	0.455	0.375	0.5	0.8	0.231	0.5	0.4	0.2	0.5	0.889
Bahamas, The	BHS	2019	100	27.3	35.8375	27.4833	60	50.1242	1	0.5	0.319	0	0.302833	0.4195	0.278	0.422	0.333333	0.266	0.5	0	-99	0.6	-99	1	1	1	1	1	0.5	0	0.83	0.23	0.538	0	0.319	0	0.143	0.143	0.8	0.273	0.125	0.333	1	0.308	0.125	0.167	0.167	0.75	0.556
Afghanistan	AFG	2019	70	59.9	68.3063	15.575	35	49.7563	0.7	0.5	0.297	1	0.693	0.608833	0.9445	0.6145	0	0.466	0	0.157	-99	0.35	-99	0	1	1	1	0.5	0.5	0.198	0.729	0.179	0.38	0	0.297	1	0.714	0.889	0.8	0.455	0.5	0.8	0.933	0.462	0.375	0.333	0.8	0.75	0.889
Liberia	LBR	2019	90	28.8333	56.825	26.4833	45	49.4283	0.9	0.5	0.365	0	0.563333	0.552833	0.6945	0.503	0.333333	0.534	0	0.192	1	0.45	0	1	1	1	1	0.5	0.5	0.329	0.763	0.352	0.381	0	0.365	0	0.714	0.667	0.619	0.455	0.125	0.8	0.933	0.462	0.222	0.4	0.8	0.5	0.889
Seychelles	SYC	2019	40	46.4667	52.8375	53.8667	50	48.6342	0.4	1	0.394	0	0.519	0.503	0.6945	0.4665	0.666667	0.466	1	0.022	-99	0.5	-99	0	0	1	1	0	1	0.326	0.739	0.34	0.519	0.048	0.394	0	0.571	0.5	0.762	0.364	0.25	0.667	0.8	0.385	0.5	0.333	0.5	0.5	0.889
Mauritania	MRT	2019	70	62.4667	47.7938	25.0833	35	48.0688	0.7	0.5	0.374	1	0.560167	0.3985	0.4445	0.503	0.333333	0.534	0	0.136	1	0.35	0	0.5	0	1	1	1	0.5	0.211	0.859	0.32	0.481	0	0.374	1	0.286	0.778	0.667	0.455	0.375	0.8	0.8	0.308	0.25	0.333	0.2	0.5	0.889
Benin	BEN	2019	70	58.3	57.2812	29.65	25	48.0463	0.7	0.5	0.249	1	0.635167	0.5145	0.389	0.7445	0.5	0.6	0	0.086	-99	0.25	0	0.5	1	1	1	0	0.5	0.217	0.514	0.258	0.254	0	0.249	1	0.571	0.667	0.762	0.636	0.375	0.8	0.8	0.462	0.375	0.5	0.2	0.75	0.778
Eswatini	SWZ	2019	90	22.4333	63.6938	19.8083	40	47.1871	0.9	0.5	0.173	0	0.622833	0.619667	0.9445	0.4235	0.333333	0.334	0	0.125	1	0.4	0	0.5	1	1	1	1	0.5	0	0.424	0.212	0.231	0	0.173	0	0.857	0.556	0.619	0.455	0.25	1	0.8	0.462	0.556	0.6	0.8	0.5	0.889
Guinea	GIN	2019	70	61.4	57.0688	20.9083	20	45.8754	0.7	0.5	0.342	1	0.594333	0.462167	0.6945	0.7015	0.333333	0.334	0	0.169	1	0.2	0	0.5	1	1	1	0	0.5	0	0.933	0.311	0.467	0	0.342	1	0.429	0.625	0.667	0.545	0.5	0.8	0.933	0.385	0.222	0.333	0.4	0.5	0.889
Gambia, The	GMB	2019	60	28.5333	64.9188	31.6417	35	44.0187	0.6	0.5	0.356	0	0.709833	0.528167	0.889	0.5905	0.666667	0.534	0	0.065	1	0.35	0	0	1	1	1	0	0.5	0.095	0.83	0.439	0.415	0	0.356	0	1	0.625	0.714	0.545	0.375	1	0.933	0.286	0.25	0.4	0.8	0.5	0.778
St. Vincent and the Grenadines	VCT	2019	40	62.6667	41.7812	40.2083	35	43.9312	0.4	0.5	0.38	1	0.4135	0.367333	0.4445	0.5555	0.333333	0.132	1	0.143	0	0.35	-99	0	1	1	0	0	0.5	0.31	0.751	0.435	0.387	0.019	0.38	1	0.286	0.444	0.762	0.364	0.125	0.5	0.8	0.154	0.25	0.333	0.167	0.5	0.889
Venezuela, RB	VEN	2019	46.6	59.9	52.075	35.75	25	43.865	0.466	0.5	0.297	1	0.480833	0.481833	0.6945	0.5835	0.5	0.266	0.5	0.164	-99	0.25	-99	0	1	0.33	1	0	0.5	0.467	0.342	0.332	0.345	0	0.297	1	0.571	0.444	0.714	0.364	0.125	0.667	0.8	0.214	0.444	0.333	0.6	0.5	0.889
Trinidad and Tobago	TTO	2019	60	27.2667	40.225	42.7583	40	42.05	0.6	0.5	0.318	0	0.381167	0.396167	0.3335	0.5525	0.333333	0.334	1	0.043	-99	0.4	-99	0	0	1	1	1	0.5	0.493	0.524	0.397	0.174	0	0.318	0	0	0.444	0.619	0.182	0.375	0.667	0.8	0.154	0.556	0.167	0.2	0.5	0.667
Solomon Islands	SLB	2019	60	60.4333	47.4562	20.4333	20	41.6646	0.6	0.5	0.313	1	0.491333	0.377333	0.4445	0.746	0.333333	0.266	0	0.218	-99	0.2	-99	0	1	1	0.5	0.5	0.5	0.098	0.635	0.306	0.527	0	0.313	1	0.286	0.667	0.714	0.364	0.25	0.667	0.8	0.214	0.25	0.333	0.167	0.5	0.889
Guyana	GUY	2019	60	57.4333	46.1313	18.8833	25	41.4896	0.6	0.5	0.223	1	0.492	0.436333	0.3335	0.572	0.333333	0.4	0	0.022	-99	0.25	-99	0	1	1	0	1	0.5	0	0.53	0.265	0.322	0	0.223	1	0.286	0.5	0.81	0.273	0.25	0.833	0.8	0.385	0.333	0.4	0.2	0.5	0.667
Papua New Guinea	PNG	2019	60	55.2667	50.6812	18.2833	20	40.8462	0.6	0.5	0.158	1	0.472167	0.455167	0.6945	0.578	0.333333	0.2	0	0.198	-99	0.2	-99	0	1	1	1	0	0.5	0.048	0.424	0.142	0.179	0	0.158	1	0.429	0.286	0.762	0.273	0.25	0.833	0.8	0.154	0.444	0.333	0.5	0.5	0.889
Vanuatu	VUT	2019	60	59.1333	45.725	23.6	15	40.6917	0.6	0.5	0.274	1	0.398333	0.434	0.6945	0.4665	0.5	0.334	0	0.11	1	0.15	0	0	1	1	1	0	0.5	0.099	0.659	0.225	0.385	0	0.274	1	0.429	0.25	0.571	0.182	0.125	0.833	0.8	0.154	0.25	0.4	0.5	0.5	0.889
Sao Tome and Principe	STP	2019	60	24.7333	42.9375	41.6833	30	39.8708	0.6	0.5	0.242	0	0.436667	0.385667	0.4445	0.5235	0.333333	0.334	1	0	1	0.3	1	0	1	1	1	0	0.5	0.411	0.411	0.387	0	0	0.242	0	0.429	0.25	0.619	0.364	0.125	0.833	0.8	0.231	0.25	0.333	0.2	0.5	0.889
Sudan	SDN	2019	53.4	57.9333	55.6562	18.8167	10	39.1613	0.534	0.5	0.238	1	0.520167	0.493667	0.9445	0.4665	0.166667	0.4	0	0.186	1	0.1	0	0	1	0.67	1	0	0.5	0	0.576	0.254	0.358	0	0.238	1	0.714	0.7	0.476	0.273	0.125	0.833	0.8	0.154	0.375	0.333	0.8	0.5	0.889
Chad	TCD	2019	56.6	51.5333	52.35	17.2333	15	38.5433	0.566	0.5	0.046	1	0.612167	0.446667	0.4445	0.567	0.333333	0.334	0	0.022	0	0.15	0	0	1	0.33	1	0.5	0.5	0.037	0.085	0.042	0.066	0	0.046	1	0.286	0.667	0.75	0.545	0.625	0.8	0.933	0.214	0.5	0.333	0.2	0.5	0.889
Haiti	HTI	2019	80	19.6667	51.2313	16.6833	20	37.5162	0.8	0.5	0.09	0	0.541333	0.439833	0.4445	0.7105	0.333333	0.334	0	0	-99	0.2	-99	1	1	1	1	0	0.5	0	0.238	0.095	0.119	0	0.09	0	0.286	0.556	0.8	0.273	0.5	0.833	0.933	0.231	0.375	0.4	0.2	0.5	0.889
Yemen, Rep.	YEM	2019	80	25.5333	37.9062	20.4167	20	36.7713	0.8	0.5	0.266	0	0.317833	0.407833	0.4445	0.411	0.166667	0.402	0	0.248	-99	0.2	-99	0	1	1	1	1	0.5	0.825	0.14	0.117	0.129	0.117	0.266	0	0.286	0.143	0.571	0.182	0.125	0.6	0.8	0.214	0.333	0.4	0.2	0.5	0.889
Djibouti	DJI	2019	40	60.3667	41.6063	16.0583	25	36.6063	0.4	0.5	0.311	1	0.424167	0.3775	0.4445	0.479	0.333333	0.266	0	0.043	0	0.25	0	0	0	1	1	0	0.5	0.093	0.689	0.168	0.321	0.284	0.311	1	0.571	0.375	0.619	0.455	0.125	0.4	0.867	0.143	0.222	0.333	0.2	0.5	0.889
Congo, Rep.	COG	2019	60	27.9333	47.8	27.15	20	36.5767	0.6	0.5	0.338	0	0.4945	0.453833	0.4445	0.5345	0.5	0.334	0	0.252	1	0.2	0	0	1	1	1	0	0.5	0	0.793	0.372	0.525	0	0.338	0	0.286	0.444	0.714	0.273	0.25	1	0.933	0.357	0.333	0.4	0.2	0.5	0.889
Iraq	IRQ	2019	30	25	61.95	22.0583	35	34.8017	0.3	0.5	0.25	0	0.604667	0.575167	0.9445	0.472	0.333333	0.4	0	0.149	1	0.35	0	0	0	0	1	0.5	0.5	0.048	0.745	0.231	0.225	0	0.25	0	0.714	0.667	0.857	0.182	0.375	0.833	0.8	0.462	0.556	0.333	0.8	0.5	0.889
Congo, Dem. Rep.	COD	2019	60	26.2667	44.325	18.175	20	33.7533	0.6	0.5	0.288	0	0.445833	0.457333	0.4445	0.392	0	0.466	0	0.261	-99	0.2	0	0	1	1	1	0	0.5	0.09	0.696	0.282	0.372	0	0.288	0	0.286	0.5	0.6	0.364	0.125	0.8	0.8	0.286	0.625	0.333	0.2	0.5	0.889
Guinea-Bissau	GNB	2019	60	27.2667	41.9875	17.7583	20	33.4025	0.6	0.5	0.318	0	0.328333	0.447667	0.639	0.392	0.333333	0.334	0	0.043	-99	0.2	-99	0	1	1	1	0	0.5	0.248	0.641	0.314	0.387	0	0.318	0	0.429	0.375	0.55	0.091	0.125	0.4	0.8	0.231	0.222	0.333	0.6	0.5	0.778
South Sudan	SSD	2019	20	41.7667	45.7875	14.8917	30	30.4892	0.2	0	0.253	1	0.442167	0.458333	0.6945	0.267	0.166667	0.198	0	0.231	1	0.3	0	0	0	0	1	0	0	0.133	0.557	0.278	0.297	0	0.253	1	0.571	0.375	0.476	0.273	0.125	0.833	0.8	0.231	0.333	0.286	0.6	0.5	0.889
Gabon	GAB	2019	40	23.7333	41.5562	14.9833	20	28.0546	0.4	0.5	0.212	0	0.425833	0.415667	0.389	0.411	0.333333	0.266	0	0	1	0.2	1	0	0	1	1	0	0.5	0.143	0.422	0.247	0.247	0	0.212	0	0.571	0.444	0.524	0.091	0.125	0.8	0.8	0.286	0.375	0.333	0.2	0.5	0.778
Syrian Arab Republic	SYR	2019	26.6	24.8333	38.0938	17.7417	25	26.4537	0.266	0.5	0.245	0	0.318667	0.4335	0.4445	0.3465	0.166667	0.4	0	0.143	-99	0.25	-99	0	0	0.33	1	0	0.5	0.33	0.549	0.071	0.275	0	0.245	0	0.143	0.286	0.667	0.091	0.125	0.6	0.8	0.143	0.625	0.333	0.2	0.5	0.889
Kiribati	KIR	2019	20	25.7667	46.1875	15.5333	15	24.4975	0.2	0.5	0.273	0	0.388667	0.480833	0.639	0.4475	0.333333	0.266	0	0.022	-99	0.15	-99	0	0	0	1	0	0.5	0.251	0.594	0.249	0.273	0	0.273	0	0.429	0.333	0.714	0.273	0.25	0.333	0.933	0.286	0.333	0.333	0.5	0.5	0.778
Micronesia, Fed. Sts.	FSM	2019	20	25.6333	41.6812	16.7833	15	23.8196	0.2	0.5	0.269	0	0.356167	0.418167	0.6945	0.317	0.333333	0.134	0	0.204	-99	0.15	-99	0	0	0	1	0	0.5	0.331	0.53	0.241	0.241	0	0.269	0	0.429	0.286	0.524	0.273	0.125	0.5	0.8	0.154	0.222	0.333	0.5	0.5	0.889
Turkmenistan	TKM	2019	46.6	0.633333	41.7875	13.3333	15	23.4708	0.466	0	0.019	0	0.4095	0.415	0.4445	0.425	0.333333	0.2	0	0	-99	0.15	-99	0	1	0.33	1	0	0	0	0.048	0.024	0.024	0	0.019	0	0.286	0.625	0.714	0.182	0.25	0.4	0.8	0.357	0.333	0.333	0.167	0.5	0.889
Libya	LBY	2019	20	20.6333	35.6125	10.7917	20	21.4075	0.2	0.5	0.119	0	0.329833	0.360667	0.4445	0.333	0.166667	0.134	0	0.131	1	0.2	0	0	0	0	1	0	0.5	0	0	0.278	0.317	0	0.119	0	0.143	0.429	0.524	0.091	0.125	0.667	0.6	0.231	0.333	0.333	0.167	0.5	0.889
Marshall Islands	MHL	2019	20	24.1	38.7188	11.4833	10	20.8604	0.2	0.5	0.223	0	0.422167	0.362667	0.389	0.354	0.333333	0.066	0	0.06	-99	0.1	-99	0	0	0	1	0	0.5	0	0.53	0.241	0.344	0	0.223	0	0.286	0.571	0.429	0.455	0.125	0.667	0.8	0.154	0.222	0.333	0.167	0.5	0.778
Somalia	SOM	2019	16.6	36.0333	45.4562	0	0	19.6179	0.166	0	0.081	1	0.357333	0.444167	0.9445	0.2875	0	0	0	0	-99	0	-99	0	0	0.33	0.5	0	0	0.048	0.143	0.024	0.048	0.143	0.081	1	0.429	0.375	0.524	0.091	0.125	0.6	0.6	0.143	0.222	0.4	0.8	0.5	0.889
American Samoa	ASM	2019	30		19.85				0.3	0			0.115333	0.154667	0.5835	0.1945			1		-99		-99	1	0	0	0.5	0	0								0.143	0	0.091	0	0.125	0.333	0.4	0	0.111	0	0.167	0.25	0.667
Andorra	AND	2019	60		26.7875				0.6	0		0	0.241333	0.23	0.3335	0.3955	0.333333	0.4	1		1		1	1	0	1	1	0	0							0	0	0	0.55	0.273	0.125	0.5	0.6	0.071	0.125	0.167	0.167	0.25	0.667
Antigua and Barbuda	ATG	2019	20		46.4438		25		0.2	0.5		0	0.464167	0.492167	0.389	0.4575	0.5	0.066	1		0	0.25	1	0	0	1	0	0	0.5							0	0.286	0.286	0.8	0.455	0.125	0.833	1	0.231	0.222	0.333	0.167	1	0.778
Aruba	ABW	2019	60		17.075				0.6	0.5			0.0876667	0.206333	0.278	0.206			1		-99		-99	1	0	1	1	0	0.5								0.143	0.125	0.091	0	0	0.167	0.8	0.077	0.111	0	0	0.25	0.556
Barbados	BRB	2019	80		50.8375		30		0.8	0.5		0	0.412833	0.5365	0.778	0.441	0.333333	0.134	1		1	0.3	0	1	0	1	1	1	0.5							0	0.429	0.125	0.8	0.273	0.25	0.6	1	0.385	0.25	0.167	0.667	0.75	0.556
Bermuda	BMU	2019	60		16.7312				0.6	0			0.14	0.1275	0.278	0.258			1		-99		-99	1	0	1	1	0	0								0.143	0	0.091	0.273	0	0.333	0.4	0.143	0.222	0	0	0	0.556
British Virgin Islands	VGB	2019	40		18.1687				0.4	0			0.1475	0.192333	0.278	0.156			1		-99		-99	1	0	1	0	0	0								0.143	0	0.045	0.364	0	0.333	0.4	0.143	0.111	0	0	0.5	0.556
Brunei Darussalam	BRN	2019	100		40.7188		45		1	0.5		1	0.338667	0.4995	0.3335	0.4095	0.666667	0.334	1		1	0.45	1	1	1	1	1	1	0.5							1	0.143	0.222	0.762	0.455	0.25	0.2	1	0.538	0.375	0.167	0.167	0.75	0.667
Cayman Islands	CYM	2019	40		17.1062				0.4	0			0.0808333	0.205333	0.278	0.232			1		0		1	1	0	1	0	0	0								0	0	0.045	0.273	0	0.167	0.8	0.071	0.111	0	0	0.25	0.556
Central African Republic	CAF	2019	20		49.2		20		0.2	0.5		0	0.485667	0.4615	0.6945	0.4	0.166667	0.2	0		1	0.2	0	0	0	1	0	0	0.5							0	0.429	0.625	0.571	0.364	0.125	0.8	0.8	0.286	0.25	0.333	0.6	0.5	0.889
Channel Islands	CHI	2019	60						0.6	0											-99		-99	1	0	1	1	0	0
Comoros	COM	2019	60		52.6562		30		0.6	0.5		1	0.460167	0.481	0.9445	0.4445	0.333333	0.4	0		0	0.3	0	0	0	1	1	1	0.5							1	0.571	0.143	0.667	0.455	0.125	0.8	0.8	0.231	0.222	0.333	0.8	0.5	0.889
Cuba	CUB	2019	70		46.875				0.7	0	0.306		0.5165	0.432833	0.4445	0.4575			1	0.164	-99		-99	1	1	0	1	0.5	0	0.393	0.533	0.141	0.463	0	0.306		0.286	0.375	0.9	0.455	0.25	0.833	0.6	0.214	0.5	0.333	0.2	0.75	0.889
Curacao	CUW	2019	40		18.5125				0.4	0			0.0638333	0.285167	0.278	0.156			1		0		1	1	0	1	0	0	0								0	0	0.091	0	0.125	0.167	0.8	0.286	0.375	0	0	0.25	0.556
Dominica	DMA	2019	20		39.9062		35		0.2	0.5		0	0.389	0.367333	0.389	0.5345	0.666667	0.2	1		1	0.35	0	0	0	1	0	0	0.5							0	0.143	0.444	0.5	0.455	0.125	0.667	0.8	0.154	0.25	0.333	0.167	0.5	0.778
Equatorial Guinea	GNQ	2019	0		44.8813		25		0	0		1	0.405667	0.444833	0.6945	0.3445	0.666667	0.132	0		1	0.25	1	0	0	0	0	0	0							1	0.571	0.25	0.524	0.364	0.125	0.6	0.8	0.214	0.222	0.333	0.6	0.5	0.889
Eritrea	ERI	2019	6.6		37.9125		10		0.066	0		0	0.3765	0.3905	0.4445	0.2875	0	0	0		-99	0.1	-99	0	0	0.33	0	0	0							0	0	0.429	0.65	0.455	0.125	0.6	0.8	0.143	0.333	0.4	0.167	0.5	0.889
Faroe Islands	FRO	2019	60		11.3938				0.6	0			0.0561667	0.0875	0.278	0.2025			1		1		1	1	0	1	1	0	0								0	0.125	0.045	0	0	0.167	0.4	0	0.125	0	0	0	0.556
French Polynesia	PYF	2019	60		14.1125				0.6	0			0.0283333	0.174333	0.3335	0.1875			1		-99		-99	1	0	1	1	0	0								0	0.125	0.045	0	0	0	0.6	0.071	0.125	0	0	0.25	0.667
Gibraltar	GIB	2019	60		12.9437				0.6	0			0.123667	0.108333	0.1665	0.173			1		-99		-99	1	0	1	1	0	0								0	0	0.045	0.364	0	0.333	0.4	0	0.25	0	0	0	0.333
Greenland	GRL	2019	50		12.5375				0.5	0			0.0706667	0.097	0.3335	0.1665			1		-99		-99	1	0	1	0.5	0	0								0	0	0.091	0	0	0.333	0.4	0.071	0.111	0	0	0	0.667
Grenada	GRD	2019	50		43.1		25		0.5	0.5		0	0.440833	0.388333	0.4445	0.516	0.666667	0.266	1		-99	0.25	-99	0	1	1	0.5	0	0.5							0	0.143	0.375	0.714	0.455	0.125	0.833	0.8	0.308	0.222	0.333	0.167	0.5	0.889
Guam	GUM	2019	60		15.3438				0.6	0			0.0915	0.160167	0.278	0.1945			1		-99		-99	1	0	1	1	0	0								0	0	0.091	0	0.125	0.333	0.6	0	0.111	0	0	0.25	0.556
Hong Kong SAR, China	HKG	2019	80		28.7375				0.8	1	0.812		0.212	0.291333	0.3335	0.4555			1	0	1		1	1	0	1	1	1	1	0.893	0.943	0.567	0.726	0.933	0.812		0.143	0.25	0.091	0.455	0	0.333	0.6	0.231	0.5	0.167	0	0.25	0.667
Isle of Man	IMN	2019	60		10.8812				0.6	0			0.0516667	0.109	0.1665	0.222			1		-99		-99	1	0	1	1	0	0								0.143	0	0	0	0	0.167	0.4	0	0.111	0.143	0	0	0.333
Korea, Dem. People’s Rep.	PRK	2019	20		43.0938				0.2	0			0.485667	0.391167	0.4445	0.3725			0		0		-99	1	0	0	0	0	0								0	0.625	0.8	0.364	0.125	1	0.8	0.214	0.333	0.333	0.167	0.5	0.889
Kosovo	XKX	2019	40	66			60		0.4	0.5	0.48	1					0.666667	0.666		0	-99	0.6	-99	1	0	1	0	0	0.5	0.431	0.868	0.459	0.434	0.207	0.48	1
Liechtenstein	LIE	2019	60		24.1625				0.6	0	0.486		0.189667	0.230333	0.3335	0.3395			1	0.131	1		1	1	0	1	1	0	0	0.542	0.526	0.453	0.52	0.387	0.486		0.143	0.143	0.045	0.182	0.125	0.5	0.4	0.071	0.125	0.286	0	0.5	0.667
Macao SAR, China	MAC	2019	80		23.925				0.8	0.5	0.424		0.1975	0.209	0.278	0.4165			1	0	1		1	1	0	1	1	1	0.5	0.615	0.652	0.19	0.431	0.231	0.424		0.143	0.25	0.045	0.455	0.125	0.167	0.6	0.154	0.333	0.167	0	0	0.556
Monaco	MCO	2019	60		27.3875				0.6	0			0.245	0.214833	0.472	0.3395			1		-99		-99	1	0	1	1	0	0								0.143	0.143	0.286	0.273	0.125	0.5	0.2	0.071	0.125	0.143	0.5	0.25	0.444
Nauru	NRU	2019	20		34.9188		5		0.2	0		0	0.338833	0.360833	0.389	0.3055	0.333333	0.134	1		1	0.05	0	0	0	0	1	0	0							0	0.286	0.143	0.524	0.455	0.125	0.5	0.8	0.143	0.222	0.333	0.167	0.5	0.778
New Caledonia	NCL	2019	70		16.025				0.7	0			0.1285	0.138667	0.3335	0.147			1		1		-99	1	0	1	1	0.5	0								0	0.222	0.091	0	0.125	0.333	0.4	0.071	0.111	0	0	0.25	0.667
Northern Mariana Islands	MNP	2019	60		11.2812				0.6	0			0.0915	0.0518333	0.3335	0.139			1		1		0	1	0	1	1	0	0								0	0	0.091	0	0.125	0.333	0.2	0	0.111	0	0	0	0.667
Palau	PLW	2019	30		34.0875		40		0.3	0.5		0	0.274167	0.360833	0.389	0.433	0.333333	0.134	1		1	0.4	1	0	0	1	0.5	0	0.5							0	0.286	0.286	0.524	0.091	0.125	0.333	0.8	0.143	0.222	0.333	0.167	0.5	0.778
Puerto Rico	PRI	2019	80		22.225				0.8	0			0.156	0.221	0.3335	0.3135			1		1		1	1	0	1	1	1	0								0	0.25	0.095	0.091	0	0.5	0.6	0.143	0.333	0	0	0.25	0.667
San Marino	SMR	2019	60		21.6187		60		0.6	0.5		1	0.249833	0.1765	0.222	0.2285			1		-99	0.6	-99	1	0	1	1	0	0.5							1	0.143	0.125	0.333	0.273	0.125	0.5	0.2	0.077	0.222	0.143	0.167	0.25	0.444
Sint Maarten (Dutch part)	SXM	2019	40		9.825				0.4	0			0.0353333	0.097	0.278	0.111			1		-99		-99	1	0	1	0	0	0								0	0	0.045	0	0	0.167	0.4	0.071	0.111	0	0	0	0.556
St. Kitts and Nevis	KNA	2019	20		28.4		25		0.2	0.5		0	0.214167	0.3165	0.278	0.402	0.333333	0.132	1		1	0.25	1	0	0	1	0	0	0.5							0	0	0.125	0.429	0.273	0.125	0.333	0.8	0.154	0.111	0.167	0.167	0.5	0.556
St. Martin (French part)	MAF	2019	40		7.05625				0.4	0			0	0.0935	0.1665	0.1175			1		-99		-99	1	0	1	0	0	0								0	0	0	0	0	0	0.2	0	0.111	0	0	0.25	0.333
Taiwan, China	TWN	2019	60						0.6	0	0.605									0.169	-99		-99	1	0	1	0	1	0	0.811	0.811	0.462	0.523	0.415	0.605
Tonga	TON	2019	90		45.1125		35		0.9	0.5		1	0.3825	0.429333	0.6945	0.479	0.666667	0.4	0		1	0.35	1	0.5	1	1	1	1	0.5							1	0.714	0.25	0.524	0.182	0.125	0.5	0.8	0.154	0.222	0.4	0.5	0.5	0.889
Turks and Caicos Islands	TCA	2019	60		12.8				0.6	0			0.0303333	0.172	0.278	0.139			1		-99		-99	1	0	1	1	0	0								0	0	0.091	0.091	0	0	0.6	0.071	0.111	0	0	0.25	0.556
Tuvalu	TUV	2019	10		36.6063		5		0.1	0.5		0	0.368167	0.391167	0.3335	0.317	0.333333	0.132	0		-99	0.05	-99	0	0	0	0.5	0	0.5							0	0.143	0.143	0.476	0.364	0.25	0.833	0.8	0.214	0.333	0.333	0.167	0.5	0.667
Virgin Islands (U.S.)	VIR	2019	60		9.9				0.6	0			0.0075	0.126833	0.278	0.111			1		-99		-99	1	0	1	1	0	0								0	0	0.045	0	0	0	0.4	0	0.111	0	0	0.25	0.556
Norway	NOR	2018	100	92.2333	77.9125	80.6667	100	90.1625	1	1	0.767	1	0.757833	0.775333	1	0.6335	0.666667	1	1	0.56	1	1	1	1	1	1	1	1	1	1	1	0.623	0.67	0.542	0.767	1	1	0.889	0.905	0.545	0.375	0.833	0.8	0.769	1	0.5	0.833	0.75	1
Italy	ITA	2018	100	91.8667	76.8812	81.825	100	90.1146	1	1	0.756	1	0.732	0.797833	1	0.561	1	0.934	1	0.339	1	1	1	1	1	1	1	1	1	0.771	0.786	0.69	0.762	0.771	0.756	1	0.857	0.8	0.857	0.545	0.5	0.833	0.8	0.833	1	0.571	0.833	0.75	1
Austria	AUT	2018	100	91.3	76.475	79.75	100	89.505	1	1	0.739	1	0.7255	0.786	1	0.5835	1	0.866	1	0.324	1	1	1	1	1	1	1	1	1	0.907	0.963	0.686	0.703	0.434	0.739	1	1	0.7	0.9	0.545	0.375	0.833	0.8	0.833	1	0.5	0.833	0.75	1
Slovenia	SVN	2018	100	96.9333	76.675	71.4417	100	89.01	1	1	0.908	1	0.750167	0.774167	1	0.561	0.666667	0.934	1	0.257	1	1	1	1	1	1	1	1	1	0.963	1	0.784	0.897	0.897	0.908	1	1	0.8	0.857	0.636	0.375	0.833	0.8	0.833	1	0.429	0.833	0.75	1
United States	USA	2018	100	94	63.0812	87.5	100	88.9163	1	1	0.82	1	0.593	0.612167	0.9445	0.4865	1	1	1	0.5	1	1	1	1	1	1	1	1	1	0.83	0.952	0.566	0.797	0.952	0.82	1	0.857	0.7	0.762	0.364	0.375	0.5	0.6	0.615	0.625	0.5	0.833	0.5	0.889
Sweden	SWE	2018	100	94.8667	76.225	72.5167	100	88.7217	1	1	0.846	1	0.712167	0.774167	1	0.639	0.666667	0.8	1	0.434	1	1	1	1	1	1	1	1	1	0.878	0.926	0.728	0.822	0.874	0.846	1	1	0.8	0.81	0.455	0.375	0.833	0.8	0.833	1	0.429	0.833	0.75	1
Finland	FIN	2018	100	94.9333	76.4375	72.2167	100	88.7175	1	1	0.848	1	0.712667	0.797833	1	0.5835	0.666667	0.8	1	0.422	1	1	1	1	1	1	1	1	1	0.859	0.963	0.689	0.897	0.834	0.848	1	1	0.7	0.857	0.6	0.286	0.833	0.8	0.833	1	0.571	0.833	0.75	1
Poland	POL	2018	100	95.1	72.9813	79.7167	95	88.5596	1	1	0.853	1	0.721167	0.7805	0.75	0.5835	0.666667	0.934	1	0.588	1	0.95	1	1	1	1	1	1	1	1	1	0.68	0.679	0.905	0.853	1	0.714	0.9	0.905	0.6	0.375	0.833	0.8	0.833	1	0.8	0.5	0.75	1
Australia	AUS	2018	100	92.6667	74.6875	74.4667	100	88.3642	1	1	0.78	1	0.7235	0.751333	1	0.5505	0.666667	1	1	0.312	1	1	1	1	1	1	1	1	1	0.963	0.411	0.599	0.976	0.952	0.78	1	1	0.778	0.9	0.455	0.375	0.833	0.8	0.75	0.875	0.5	0.833	0.75	1
Switzerland	CHE	2018	100	87.6667	78.5875	85.025	90	88.2558	1	1	0.63	1	0.739167	0.802667	1	0.6615	1	1	1	0.401	1	0.9	1	1	1	1	1	1	1	0.981	0.644	0.699	0.804	0.019	0.63	1	1	0.7	0.857	0.545	0.5	0.833	0.8	0.833	1	0.6	0.833	0.75	1
Netherlands	NLD	2018	100	98.5	71.1312	69.9167	100	87.9096	1	1	0.955	1	0.708167	0.770167	0.6945	0.561	0.666667	0.8	1	0.33	1	1	1	1	1	1	1	1	1	1	1	0.775	1	1	0.955	1	0.714	0.8	0.857	0.545	0.5	0.833	0.8	0.833	1	0.571	0.667	0.75	0.889
Spain	ESP	2018	100	90.8667	75.4938	77.8667	95	87.8454	1	1	0.726	1	0.711167	0.774167	1	0.5835	0.666667	1	1	0.448	1	0.95	1	1	1	1	1	1	1	0.802	0.981	0.629	0.777	0.439	0.726	1	0.857	0.8	0.857	0.545	0.375	0.833	0.8	0.833	1	0.429	0.833	0.75	1
Mexico	MEX	2018	100	92.9333	90.625	80.2833	75	87.7683	1	1	0.788	1	0.912833	0.9075	1	0.789	0.833333	0.934	1	0.444	-99	0.75	-99	1	1	1	1	1	1	0.963	0.83	0.841	0.826	0.481	0.788	1	1	1	1	0.727	0.75	1	1	0.917	0.778	0.75	1	1	1
Germany	DEU	2018	100	96.4667	70.825	74.9167	95	87.4417	1	1	0.894	1	0.6965	0.747667	0.75	0.5835	0.666667	0.934	1	0.396	1	0.95	1	1	1	1	1	1	1	1	1	0.651	0.821	1	0.894	1	0.714	0.8	0.857	0.6	0.375	0.833	0.8	0.769	1	0.5	0.667	0.75	1
Estonia	EST	2018	100	93.9333	70.9	68.9417	100	86.755	1	1	0.818	1	0.746167	0.7445	0.639	0.561	0.666667	0.866	1	0.225	1	1	1	1	1	1	1	1	1	0.963	0.963	0.769	0.963	0.434	0.818	1	0.857	0.8	0.9	0.545	0.375	1	0.8	0.75	1	0.5	0.667	0.75	0.778
France	FRA	2018	100	90.8	75.5938	66.6417	100	86.6071	1	1	0.724	1	0.721333	0.774167	1	0.561	0.666667	0.934	1	0.065	1	1	1	1	1	1	1	1	1	0.708	0.614	0.472	0.858	0.967	0.724	1	1	0.8	0.9	0.545	0.25	0.833	0.8	0.833	1	0.429	0.833	0.75	1
Canada	CAN	2018	100	93.2	60.5375	84.1167	95	86.5708	1	1	0.796	1	0.589167	0.675	0.5	0.5505	0.666667	1	1	0.698	1	0.95	1	1	1	1	1	1	1	0.915	0.967	0.651	0.967	0.481	0.796	1	0.429	0.8	0.9	0.364	0.375	0.667	0.8	0.667	1	0.5	0.333	0.75	1
Denmark	DNK	2018	90	98.7	69.1312	73.8667	100	86.3396	0.9	1	0.961	1	0.6945	0.7305	0.6945	0.561	0.666667	0.866	1	0.422	1	1	1	1	1	1	0.5	1	1	1	1	0.803	1	1	0.961	1	0.714	0.8	0.9	0.545	0.375	0.833	0.8	0.833	1	0.5	0.5	0.75	0.889
Ireland	IRL	2018	100	94.7333	75.4125	66.3417	95	86.2975	1	1	0.842	1	0.699167	0.784	1	0.5835	0.666667	0.866	1	0.121	1	0.95	1	1	1	1	1	1	1	0.963	0.963	0.798	0.524	0.963	0.842	1	1	0.8	0.857	0.455	0.25	0.833	0.8	0.75	1	0.571	0.833	0.75	1
Turkey	TUR	2018	100	84	88.675	61.4417	95	85.8233	1	1	0.52	1	0.8255	0.958333	1	0.7425	0.666667	0.666	1	0.125	-99	0.95	-99	1	1	1	1	1	1	0.768	0.052	0.434	0.548	0.801	0.52	1	1	0.9	1	0.636	0.75	0.667	1	0.75	1	1	1	1	1
Slovak Republic	SVK	2018	90	94.9333	70.5563	73.0917	100	85.7163	0.9	1	0.848	1	0.678667	0.758333	0.75	0.5835	0.666667	0.934	1	0.323	1	1	1	1	1	1	0.5	1	1	0.943	1	0.792	0.576	0.929	0.848	1	0.714	0.7	0.905	0.545	0.375	0.833	0.8	0.833	1	0.5	0.667	0.75	1
Portugal	PRT	2018	100	90.7667	71.2375	65.7917	100	85.5592	1	1	0.723	1	0.716167	0.7465	0.75	0.561	0.666667	0.866	1	0.099	1	1	1	1	1	1	1	1	1	1	0.905	0.845	0.867	0	0.723	1	0.714	0.8	0.905	0.545	0.5	0.833	0.8	0.833	1	0.429	0.667	0.75	1
Lithuania	LTU	2018	100	91.8333	63.4937	71.8667	100	85.4387	1	1	0.755	1	0.687667	0.688833	0.389	0.561	0.666667	0.866	1	0.342	1	1	1	1	1	1	1	1	1	0.981	1	0.934	0.812	0.048	0.755	1	0.571	0.8	0.905	0.6	0.25	1	0.8	0.75	1	0.5	0.333	0.75	0.778
Japan	JPN	2018	90	90.5333	72.9625	78.3	95	85.3592	0.9	1	0.716	1	0.666	0.753667	1	0.578	1	0.666	1	0.466	1	0.95	1	1	1	1	0.5	1	1	0.963	0.844	0.375	0.481	0.915	0.716	1	0.857	0.667	0.9	0.364	0.375	0.833	0.8	0.75	0.889	0.5	0.833	0.75	1
Czech Republic	CZE	2018	90	90.1	75.3625	75.6167	95	85.2158	0.9	1	0.703	1	0.703333	0.786	1	0.561	0.666667	0.934	1	0.424	1	0.95	1	1	1	1	0.5	1	1	0.963	0.963	0.497	0.613	0.481	0.703	1	1	0.7	0.857	0.455	0.375	0.833	0.8	0.833	1	0.5	0.833	0.75	1
Hungary	HUN	2018	100	86.8667	69.7	68.2667	100	84.9667	1	1	0.606	1	0.709667	0.7305	0.6945	0.561	0.666667	0.934	1	0.13	1	1	1	1	1	1	1	1	1	0.859	0.859	0.511	0.775	0.024	0.606	1	0.714	0.8	0.9	0.636	0.375	0.833	0.8	0.833	1	0.5	0.5	0.75	0.889
Korea, Rep.	KOR	2018	100	93.4	76.6063	74.0667	80	84.8146	1	1	0.802	1	0.721	0.824833	1	0.491	0.666667	1	1	0.296	1	0.8	1	1	1	1	1	1	1	0.874	0.926	0.804	0.481	0.926	0.802	1	0.857	0.8	0.952	0.455	0.429	0.833	1	0.615	1	0.667	0.667	1	1
Greece	GRC	2018	100	87.5	70.6188	69.1167	95	84.4471	1	1	0.625	1	0.708167	0.7305	0.75	0.5835	0.666667	0.934	1	0.164	1	0.95	1	1	1	1	1	1	1	0.471	0.674	0.378	0.642	0.963	0.625	1	0.714	0.8	0.857	0.545	0.5	0.833	0.8	0.833	1	0.5	0.5	0.75	1
Latvia	LVA	2018	100	89.1667	62.7875	68.0417	100	83.9992	1	1	0.675	1	0.670667	0.687	0.389	0.561	0.666667	0.934	1	0.121	1	1	1	1	1	1	1	1	1	0.886	0.905	0.792	0.76	0.033	0.675	1	0.571	0.8	0.9	0.545	0.375	0.833	0.8	0.75	0.889	0.6	0.333	0.75	0.778
United Kingdom	GBR	2018	100	86.8	74.7812	64.9417	90	83.3046	1	1	0.604	1	0.717	0.775333	1	0.5055	0.666667	0.866	1	0.065	1	0.9	1	1	1	1	1	1	1	0.775	0.384	0.35	0.738	0.775	0.604	1	0.857	0.8	0.857	0.455	0.5	0.833	0.8	0.769	1	0.5	0.833	0.75	1
New Zealand	NZL	2018	100	91.6333	71.5	63.1667	90	83.26	1	1	0.749	1	0.648333	0.7305	1	0.5835	0.666667	0.8	1	0.06	1	0.9	1	1	1	1	1	1	1	0.77	0.926	0.628	0.537	0.884	0.749	1	0.857	0.625	0.905	0.545	0.125	0.833	0.8	0.75	1	0.5	0.833	0.5	1
Bulgaria	BGR	2018	100	90.1	62.4	70.8417	90	82.6683	1	1	0.703	1	0.624667	0.593	0.8335	0.5055	0.666667	0.934	1	0.233	-99	0.9	-99	1	1	1	1	1	1	0.863	0.745	0.623	0.821	0.463	0.703	1	0.857	0.8	0.81	0.364	0.25	0.667	0.6	0.583	0.625	0.333	0.667	0.75	0.667
Armenia	ARM	2018	100	84.9667	82.0438	59.9417	85	82.3904	1	1	0.549	1	0.8225	0.809667	0.9445	0.7225	0.666667	0.6	1	0.131	-99	0.85	-99	1	1	1	1	1	1	0.715	0.746	0.612	0.671	0	0.549	1	1	0.889	0.952	0.636	0.625	0.833	0.933	0.75	0.625	0.75	0.8	1	0.889
Belgium	BEL	2018	100	83.9333	64.1375	65.9167	95	81.7975	1	1	0.518	1	0.6775	0.679167	0.5	0.561	0.666667	0.8	1	0.17	1	0.95	1	1	1	1	1	1	1	0.706	0.617	0.578	0.407	0.28	0.518	1	0.571	0.8	0.85	0.636	0.375	0.833	0.8	0.692	1	0.5	0.333	0.75	1
Cyprus	CYP	2018	100	92.2667	54.6625	71.6583	85	80.7175	1	1	0.768	1	0.535667	0.570833	0.5835	0.47	0.833333	0.934	1	0.099	-99	0.85	-99	1	1	1	1	1	1	0.878	0.721	0.467	0.841	0.933	0.768	1	0.571	0.6	0.762	0.364	0.25	0.667	0.8	0.5	0.625	0.5	0.5	0.5	0.667
Chile	CHL	2018	100	76.9667	81.0312	59.525	85	80.5046	1	1	0.309	1	0.786667	0.864833	1	0.528	0.5	0.6	1	0.281	1	0.85	1	1	1	1	1	1	1	0.496	0.588	0.079	0.382	0	0.309	1	1	0.9	0.9	0.545	0.375	1	1	0.833	0.889	0.667	0.8	1	1
Kazakhstan	KAZ	2018	100	82.1333	80.175	62.35	70	78.9317	1	1	0.464	1	0.8335	0.738833	0.9445	0.7525	0.5	0.6	1	0.394	-99	0.7	-99	1	1	1	1	1	1	0.896	0.463	0.468	0.49	0	0.464	1	1	0.778	0.905	0.818	0.5	1	0.933	0.583	0.75	0.75	0.667	0.75	0.889
Luxembourg	LUX	2018	80	90.4333	63.9438	59.2917	100	78.7338	0.8	1	0.713	1	0.669333	0.700667	0.4445	0.561	0.666667	0.666	1	0.039	1	1	1	1	0	1	1	1	1	0.774	0.793	0.652	0.571	0.774	0.713	1	0.571	0.8	0.857	0.455	0.5	0.833	0.8	0.75	1	0.571	0.333	0.75	0.889
Iceland	ISL	2018	80	87.8	61.1063	61.6667	100	78.1146	0.8	1	0.634	1	0.618167	0.6335	0.5	0.6335	0.666667	0.8	1	0	1	1	1	1	0	1	1	1	1	0.915	0.915	0.84	0.5	0	0.634	1	0.571	0.8	0.857	0.273	0.375	0.833	0.8	0.667	1	0.667	0.167	0.5	1
Albania	ALB	2018	100	69.7667	73.775	59.4417	85	77.5967	1	0.5	0.593	1	0.783	0.661167	0.9445	0.625	0.666667	0.534	1	0.177	-99	0.85	-99	1	1	1	1	1	0.5	0.804	0.933	0.717	0.509	0	0.593	1	0.714	0.9	0.857	0.727	0.5	1	0.8	0.5	0.5	0.75	0.667	0.75	0.889
Israel	ISR	2018	100	85.7333	59.55	46.4833	95	77.3533	1	1	0.572	1	0.588	0.683333	0.389	0.561	0.333333	0.466	1	0.06	1	0.95	1	1	1	1	1	1	1	0.859	0.812	0.368	0.448	0.372	0.572	1	0.429	0.75	0.762	0.545	0.375	0.667	0.8	0.75	0.667	0.8	0.333	0.75	0.778
Mauritius	MUS	2018	100	86.2	63.9312	66.375	70	77.3012	1	1	0.586	1	0.581667	0.677833	0.6945	0.6415	1	0.534	1	0.121	-99	0.7	-99	1	1	1	1	1	1	0.796	0.693	0.369	0.571	0.5	0.586	1	0.571	0.6	0.857	0.545	0.25	0.667	0.8	0.667	0.75	0.6	0.5	0.75	0.889
Costa Rica	CRI	2018	100	86.4667	75.5125	66.4667	55	76.6892	1	1	0.594	1	0.7645	0.708333	0.9445	0.678	0.666667	0.8	1	0.192	-99	0.55	-99	1	1	1	1	1	1	0.716	0.732	0.349	0.548	0.624	0.594	1	1	0.667	1	0.545	0.375	1	0.933	0.75	0.667	0.6	0.8	0.5	0.889
Romania	ROU	2018	90	87.1667	56.6875	73.6417	75	76.4992	0.9	1	0.615	1	0.576	0.554167	0.5835	0.561	0.666667	0.934	1	0.345	-99	0.75	-99	1	1	1	0.5	1	1	0.789	0.889	0.614	0.751	0.033	0.615	1	0.857	0.556	0.762	0.364	0.25	0.667	0.6	0.5	0.625	0.6	0.5	0.5	0.667
Mongolia	MNG	2018	100	80	78.3688	63.9417	60	76.4621	1	0.5	0.9	1	0.872333	0.6705	0.9445	0.6965	0.666667	0.6	1	0.291	-99	0.6	-99	1	1	1	1	1	0.5	0.939	0.963	0.939	0.695	0.963	0.9	1	1	0.9	0.857	0.727	0.75	1	0.8	0.667	0.556	0.5	1	0.5	0.889
Thailand	THA	2018	100	76.4667	77.45	57.85	70	76.3533	1	1	0.294	1	0.7495	0.7195	0.9445	0.8445	1	0.732	0.5	0.082	-99	0.7	-99	1	1	1	1	1	1	0	0.896	0.079	0.496	0	0.294	1	0.857	1	0.857	0.545	0.571	0.667	0.8	0.667	0.75	0.6	1	0.5	0.889
Philippines	PHL	2018	100	88.2667	75.9562	80.175	35	75.8796	1	1	0.648	1	0.790333	0.6695	0.9445	0.7525	1	1	1	0.207	-99	0.35	-99	1	1	1	1	1	1	0.751	1	0.471	0.5	0.519	0.648	1	0.857	0.9	0.905	0.455	0.625	1	0.8	0.5	0.667	0.75	0.8	0.5	0.889
Kyrgyz Republic	KGZ	2018	100	81.4667	74.5812	53.0583	70	75.8213	1	1	0.444	1	0.775333	0.676333	0.9445	0.667	0.333333	0.466	1	0.323	-99	0.7	-99	1	1	1	1	1	1	0.533	0.463	0.349	0.43	0.448	0.444	1	1	0.778	0.905	0.636	0.5	0.833	0.933	0.583	0.625	0.75	0.667	0.5	0.889
Russian Federation	RUS	2018	93.4	83.6667	60.3	61.2	80	75.7133	0.934	1	0.51	1	0.562333	0.584333	0.8335	0.5505	0.5	0.668	1	0.28	-99	0.8	-99	1	1	0.67	1	1	1	0.505	0.568	0.382	0.548	0.548	0.51	1	0.714	0.556	0.762	0.3	0.375	0.667	0.6	0.583	0.556	0.6	0.667	0.5	0.667
Moldova	MDA	2018	100	94.2333	55.0562	58.8167	70	75.6213	1	1	0.827	1	0.6185	0.502833	0.4445	0.596	0.666667	0.466	1	0.22	-99	0.7	-99	1	1	1	1	1	1	0.933	0.933	0.777	0.654	0.838	0.827	1	0.571	0.625	0.81	0.455	0.25	1	0.6	0.5	0.75	0.75	0.167	0.25	0.889
Belarus	BLR	2018	100	79.2333	66.1937	51.8583	80	75.4571	1	1	0.377	1	0.693	0.6605	0.639	0.596	0.333333	0.4	1	0.341	-99	0.8	-99	1	1	1	1	1	1	0.344	0.748	0.268	0.524	0	0.377	1	0.714	0.667	0.857	0.545	0.375	1	0.8	0.538	0.625	0.75	0.5	0.75	0.778
Brazil	BRA	2018	90	83.3	76.575	62.375	65	75.45	0.9	1	0.499	1	0.747667	0.8305	0.6945	0.697	0.5	0.6	1	0.395	-99	0.65	-99	1	1	1	1	0.5	1	0.897	0.578	0.515	0.505	0	0.499	1	0.857	0.7	0.9	0.6	0.429	1	0.933	0.833	0.667	0.75	0.8	1	0.889
Georgia	GEO	2018	100	86.4667	73.9813	51.7833	65	75.4463	1	1	0.594	1	0.756167	0.6695	0.9445	0.697	0.333333	0.6	1	0.138	-99	0.65	-99	1	1	1	1	1	1	0.73	0.919	0.606	0.713	0	0.594	1	1	0.667	0.95	0.545	0.375	1	0.933	0.5	0.667	0.75	0.667	0.5	0.889
South Africa	ZAF	2018	83.4	85.5	77.9813	65.2	65	75.4163	0.834	1	0.565	1	0.793333	0.7305	0.9445	0.7225	0.5	0.8	1	0.308	-99	0.65	-99	0.5	1	0.67	1	1	1	0.442	0.794	0.397	0.434	0.76	0.565	1	1	0.9	0.905	0.455	0.5	1	0.8	0.583	0.75	0.5	1	0.75	0.889
Serbia	SRB	2018	100	67.3667	72.5438	61.5167	75	75.2854	1	0.5	0.521	1	0.783667	0.616667	0.9445	0.658	0.666667	0.734	1	0.06	-99	0.75	-99	1	1	1	1	1	0.5	0.483	0.753	0.402	0.542	0.424	0.521	1	1	0.8	0.857	0.545	0.5	1	0.6	0.583	0.75	0.6	0.667	0.5	0.889
Egypt, Arab Rep.	EGY	2018	100	76.8	79.175	56.75	60	74.545	1	1	0.304	1	0.8335	0.722167	0.9445	0.7225	0.5	0.6	1	0.17	-99	0.6	-99	1	1	1	1	1	1	0.056	0.896	0.128	0.439	0	0.304	1	1	0.889	0.952	0.636	0.857	0.667	0.933	0.75	0.75	0.6	0.8	0.5	0.889
Singapore	SGP	2018	100	100	42.975	53.3333	75	74.2617	1	1	1	1	0.4495	0.432	0.278	0.5155	0.333333	0.8	1	0	1	0.75	1	1	1	1	1	1	1	1	1	1	1	1	1	1	0.143	0.375	0.762	0.5	0.25	0.667	0.8	0.333	0.625	0.167	0.167	0.5	0.556
Malta	MLT	2018	100	84	46.35	68.5917	70	73.7883	1	1	0.52	1	0.504667	0.482	0.278	0.47	0.666667	0.934	1	0.143	-99	0.7	-99	1	1	1	1	1	1	0.251	0.714	0.35	0.573	0.714	0.52	1	0.429	0.556	0.762	0.364	0.25	0.667	0.6	0.5	0.625	0.5	0.167	0.5	0.556
Ecuador	ECU	2018	100	87.7333	78.7438	55.5917	45	73.4137	1	1	0.632	1	0.810167	0.75	0.9445	0.6745	0.666667	0.8	0.5	0.257	-99	0.45	-99	1	1	1	1	1	1	0.732	0.783	0.41	0.646	0.588	0.632	1	1	0.9	0.95	0.636	0.375	1	0.933	0.667	0.75	0.6	0.8	0.75	0.889
Malaysia	MYS	2018	86.6	84.0333	74.2375	68.2	50	72.6142	0.866	1	0.521	1	0.758667	0.689	0.9445	0.6515	1	0.532	1	0.196	-99	0.5	-99	1	1	0.33	1	1	1	0.859	0.859	0.44	0.43	0.019	0.521	1	1	0.9	0.857	0.545	0.25	1	0.8	0.667	0.75	0.75	0.667	0.5	0.889
Indonesia	IDN	2018	100	87.3333	75.6312	43.7917	55	72.3512	1	1	0.62	1	0.746	0.738833	0.9445	0.6515	0.666667	0.8	0	0.285	-99	0.55	-99	1	1	1	1	1	1	0.585	0.849	0.458	0.377	0.83	0.62	1	1	0.778	0.8	0.636	0.429	0.833	0.933	0.583	0.667	0.75	1	0.5	0.889
Sri Lanka	LKA	2018	100	81.0333	69.0125	66.425	45	72.2942	1	1	0.431	1	0.705667	0.616	0.9445	0.6115	1	0.532	1	0.125	-99	0.45	-99	1	1	1	1	1	1	0.246	0.976	0.392	0.542	0	0.431	1	0.857	0.9	0.905	0.364	0.375	0.833	0.8	0.462	0.667	0.6	0.667	0.5	0.889
Colombia	COL	2018	100	84.2667	84.0187	42.275	45	71.1121	1	1	0.528	1	0.834167	0.822167	0.9445	0.808	0.5	0.934	0	0.257	-99	0.45	-99	1	1	1	1	1	1	0.893	0.18	0.332	0.775	0.463	0.528	1	1	0.889	1	0.545	0.571	1	0.933	0.75	0.75	0.75	1	0.75	0.889
West Bank and Gaza	PSE	2018	80	86.5667	58.7062	65.7333	60	70.2013	0.8	1	0.597	1	0.619667	0.467333	0.9445	0.491	0.833333	0.934	0.5	0.362	-99	0.6	-99	1	0	1	1	1	1	0.251	0.915	0.43	0.471	0.915	0.597	1	1	0.75	0.381	0.545	0.375	0.667	0.6	0.538	0.333	0.333	0.5	0.5	0.889
North Macedonia	MKD	2018	100	88.0667	51.6938	55.9833	55	70.1488	1	1	0.642	1	0.619833	0.428167	0.4445	0.547	0.333333	0.802	1	0.104	-99	0.55	-99	1	1	1	1	1	1	0.893	0.952	0.642	0.675	0.048	0.642	1	0.571	0.556	0.762	0.455	0.375	1	0.6	0.385	0.667	0.5	0.167	0.25	0.889
Ukraine	UKR	2018	100	46.0667	67.7562	49.0167	85	69.5679	1	1	0.382	0	0.679333	0.614	0.9445	0.596	0.166667	0.734	1	0.06	-99	0.85	-99	1	1	1	1	1	1	0.328	0.878	0.269	0.435	0	0.382	0	1	0.7	0.762	0.364	0.25	1	0.6	0.5	0.667	0.75	0.667	0.5	0.889
Peru	PER	2018	90	85.7667	78.6312	51.1333	40	69.1063	0.9	1	0.573	1	0.806833	0.734333	0.9445	0.7225	0.833333	1	0	0.212	-99	0.4	-99	1	1	1	1	0.5	1	0.878	0.772	0.614	0.504	0.095	0.573	1	1	0.8	0.905	0.636	0.5	1	0.8	0.75	0.556	0.75	0.8	0.75	0.889
India	IND	2018	80	87.9667	60.2188	67.225	50	69.0821	0.8	1	0.639	1	0.622667	0.591667	0.4445	0.73	1	0.8	0.5	0.389	-99	0.5	-99	0	1	1	1	1	1	0.963	0.784	0.387	0.647	0.415	0.639	1	0.286	0.9	0.762	0.455	0.5	0.833	0.933	0.5	0.667	0.5	0.2	0.75	0.889
Uruguay	URY	2018	100	83.9	65.0375	68.4	25	68.4675	1	1	0.517	1	0.6175	0.6335	0.889	0.561	1	0.6	1	0.136	-99	0.25	-99	1	1	1	1	1	1	0.907	0.357	0.341	0.5	0.481	0.517	1	0.857	0.6	0.762	0.636	0.25	0.6	0.8	0.667	0.667	0.5	0.667	0.5	0.778
Azerbaijan	AZE	2018	80	64.6333	61.0562	55.0917	80	68.1562	0.8	0.5	0.439	1	0.639833	0.561667	0.6945	0.5855	0.666667	0.334	1	0.203	-99	0.8	-99	0	1	1	1	1	0.5	0.934	0.398	0.52	0.343	0	0.439	1	0.429	0.667	0.857	0.6	0.286	1	0.8	0.462	0.625	0.4	0.333	0.75	0.889
El Salvador	SLV	2018	90	79.9333	75.675	44.9333	50	68.1083	0.9	1	0.398	1	0.799333	0.727833	0.6945	0.778	0.333333	0.334	1	0.13	-99	0.5	-99	1	1	1	1	0.5	1	0.415	0.781	0.32	0.472	0	0.398	1	0.857	0.778	0.9	0.636	0.625	1	0.933	0.667	0.667	0.75	0.6	0.75	0.889
Uganda	UGA	2018	100	64.2	77.825	38.0333	60	68.0117	1	0.5	0.426	1	0.799	0.707333	0.9445	0.7625	0.833333	0.666	0	0.022	-99	0.6	-99	1	1	1	1	1	0.5	0.271	0.806	0.354	0.627	0.071	0.426	1	1	0.875	0.714	0.455	0.75	1	0.8	0.5	0.444	0.75	1	0.75	0.889
Rwanda	RWA	2018	100	72.4333	70.8563	45.2417	45	66.7062	1	0.5	0.673	1	0.761167	0.693	0.6945	0.6115	0.666667	1	0	0.143	-99	0.45	-99	1	1	1	1	1	0.5	0.589	0.963	0.325	0.542	0.943	0.673	1	0.857	0.778	0.762	0.545	0.625	1	0.8	0.583	0.625	0.6	0.8	0.75	0.889
Vietnam	VNM	2018	100	64	58.4	75.725	35	66.625	1	0.5	0.42	1	0.656333	0.558333	0.4445	0.5835	1	0.8	1	0.229	-99	0.35	-99	1	1	1	1	1	0.5	0.557	0.697	0.551	0.293	0	0.42	1	0.571	0.9	0.714	0.545	0.375	0.833	0.8	0.583	0.667	0.6	0.2	0.5	0.889
Croatia	HRV	2018	80	50.7667	57.625	63.8667	80	66.4517	0.8	1	0.523	0	0.598	0.5875	0.5835	0.47	0.666667	0.866	1	0.022	-99	0.8	-99	1	1	1	0	1	1	0.359	0.896	0.43	0.481	0.448	0.523	0	0.857	0.6	0.85	0.364	0.25	0.667	0.8	0.5	0.625	0.6	0.5	0.5	0.667
Argentina	ARG	2018	70	79.4667	78.8063	63.0917	35	65.2729	0.7	1	0.384	1	0.728167	0.836167	0.9445	0.667	0.666667	0.732	1	0.125	-99	0.35	-99	0	1	1	0.5	1	1	0.793	0.177	0.382	0.566	0	0.384	1	1	0.7	0.95	0.636	0.25	0.833	1	0.75	0.667	0.6	1	1	0.889
Montenegro	MNE	2018	90	64.2667	65.7188	58.7167	45	64.7404	0.9	0.5	0.428	1	0.675667	0.561167	0.9445	0.6025	0.666667	0.6	1	0.082	-99	0.45	-99	1	1	1	0.5	1	0.5	0.752	0.41	0.26	0.717	0	0.428	1	1	0.7	0.857	0.455	0.375	0.667	0.6	0.5	0.75	0.6	0.667	0.25	0.889
Tunisia	TUN	2018	90	85.6667	63.95	49.8083	30	63.885	0.9	1	0.57	1	0.695333	0.583333	0.6945	0.5855	0.333333	0.534	1	0.125	-99	0.3	-99	0.5	1	1	1	1	1	0.55	0.889	0.535	0.43	0.444	0.57	1	0.857	0.8	0.81	0.455	0.25	1	0.8	0.25	0.75	0.6	0.6	0.5	0.889
Guatemala	GTM	2018	90	62.1	76.9125	58.3	25	62.4625	0.9	0.5	0.363	1	0.821667	0.663833	0.9445	0.752	0.5	0.668	1	0.164	-99	0.25	-99	0.5	1	1	1	1	0.5	0.567	0.617	0.213	0.421	0	0.363	1	1	0.778	0.857	0.545	0.75	1	0.933	0.583	0.667	0.5	0.8	0.5	0.889
Bolivia	BOL	2018	100	68.5333	72.4625	54.3667	15	62.0725	1	0.5	0.556	1	0.764167	0.7045	0.6945	0.6965	0.666667	0.734	0.5	0.274	-99	0.15	-99	1	1	1	1	1	0.5	0.76	0.849	0.741	0.43	0	0.556	1	0.857	0.9	0.95	0.545	0.5	0.833	0.933	0.75	0.444	0.75	0.6	0.75	0.889
Senegal	SEN	2018	80	81.0333	66.5687	39.9167	40	61.5037	0.8	1	0.431	1	0.719833	0.591667	0.6945	0.6965	0.666667	0.734	0	0.196	-99	0.4	-99	0	1	1	1	1	1	0.071	0.91	0.253	0.528	0.395	0.431	1	0.571	0.8	0.762	0.636	0.75	0.8	0.8	0.583	0.667	0.4	0.6	0.5	0.889
Bosnia and Herzegovina	BIH	2018	80	60.6667	58.1	47.3833	60	61.23	0.8	0.5	0.32	1	0.583167	0.619333	0.4445	0.596	0.333333	0.534	1	0.028	-99	0.6	-99	0	1	1	1	1	0.5	0.081	0.826	0.269	0.424	0	0.32	1	0.429	0.556	0.9	0.364	0.25	1	0.8	0.583	0.75	0.5	0.333	0.75	0.889
Honduras	HND	2018	90	62.3667	67.975	45.0083	40	61.07	0.9	0.5	0.371	1	0.642167	0.716667	0.6945	0.667	0.333333	0.734	0.5	0.233	-99	0.4	-99	1	1	1	1	0.5	0.5	0.658	0.425	0.253	0.519	0	0.371	1	0.714	0.444	0.9	0.545	0.25	1	0.933	0.75	0.667	0.6	0.6	0.75	0.889
Pakistan	PAK	2018	100	60.9667	74.3063	34.95	35	61.0446	1	0.5	0.329	1	0.767667	0.711167	0.9445	0.5635	0.5	0.6	0	0.298	-99	0.35	-99	1	1	1	1	1	0.5	0	0.889	0.288	0.468	0	0.329	1	1	0.889	0.762	0.455	0.5	1	0.8	0.667	0.75	0.75	0.8	0.5	0.889
Myanmar	MMR	2018	86.6	67.0667	73.075	42.9417	35	60.9367	0.866	0.5	0.512	1	0.755167	0.641667	0.9445	0.711	0.666667	0.734	0	0.317	-99	0.35	-99	1	1	0.33	1	1	0.5	0.586	0.867	0.656	0.452	0	0.512	1	1	0.889	0.762	0.455	0.625	0.8	0.8	0.667	0.75	0.333	0.8	0.5	0.889
Dominican Republic	DOM	2018	100	65.6	63.075	25.8083	50	60.8967	1	0.5	0.468	1	0.697833	0.566667	0.4445	0.808	0.333333	0.6	0	0.099	-99	0.5	-99	1	1	1	1	1	0.5	0.811	0.763	0.244	0.524	0	0.468	1	0.571	0.556	1	0.727	0.5	0.833	0.933	0.667	0.5	0.6	0.2	0.5	0.889
Kuwait	KWT	2018	100	66.3333	50.0125	63.125	25	60.8942	1	0.5	0.49	1	0.509667	0.5045	0.528	0.4305	0.5	0.8	1	0.225	-99	0.25	-99	1	1	1	1	1	0.5	0.821	0.896	0.269	0.462	0	0.49	1	0.286	0.667	0.8	0.455	0.25	0.6	1	0.25	0.444	0.333	0.5	0.5	0.556
Togo	TGO	2018	90	59.8333	72.1375	41.025	40	60.5992	0.9	0.5	0.295	1	0.775167	0.625333	0.9445	0.625	1	0.466	0	0.175	-99	0.4	-99	0.5	1	1	1	1	0.5	0.244	0.62	0.296	0.314	0	0.295	1	1	0.889	0.667	0.545	0.75	0.8	0.8	0.385	0.667	0.6	0.8	0.5	0.889
Ghana	GHA	2018	100	61.2667	66	33.6	40	60.1733	1	0.5	0.338	1	0.713833	0.6295	0.6945	0.5555	0.5	0.534	0	0.31	-99	0.4	-99	1	1	1	1	1	0.5	0.167	0.867	0.206	0.452	0	0.338	1	0.857	0.667	0.714	0.545	0.5	1	0.933	0.5	0.444	0.6	0.8	0.5	0.889
Morocco	MAR	2018	70	88.4	67.3625	28.525	45	59.8575	0.7	1	0.652	1	0.693667	0.5555	0.9445	0.697	0.5	0.466	0	0.175	-99	0.45	-99	0.5	0	1	1	1	1	0.461	0.933	0.467	0.467	0.933	0.652	1	0.571	0.8	0.905	0.6	0.286	1	0.8	0.333	0.5	0.4	0.8	0.5	0.889
Zimbabwe	ZWE	2018	90	59.9333	61.175	41.4417	45	59.51	0.9	0.5	0.298	1	0.591667	0.6445	0.6945	0.491	0.666667	0.734	0	0.257	-99	0.45	-99	0.5	1	1	1	1	0.5	0.177	0.697	0.268	0.349	0	0.298	1	0.571	0.75	0.714	0.182	0.5	0.833	0.8	0.417	0.5	0.6	0.8	0.75	0.889
Zambia	ZMB	2018	90	57.8	72.9375	36.8083	40	59.5092	0.9	0.5	0.234	1	0.770333	0.661167	0.9445	0.596	0.333333	0.8	0	0.339	-99	0.4	-99	0.5	1	1	1	1	0.5	0.037	0.583	0.153	0.329	0.067	0.234	1	1	0.875	0.667	0.455	0.625	1	0.8	0.417	0.5	0.75	1	0.5	0.889
United Arab Emirates	ARE	2018	100	36.8667	41.825	52.5917	65	59.2567	1	0.5	0.606	0	0.434333	0.445833	0.222	0.4835	0.666667	0.2	1	0.237	-99	0.65	-99	1	1	1	1	1	0.5	0.756	0.756	0.457	0.378	0.684	0.606	0	0.286	0.444	0.762	0.364	0.25	0.5	0.8	0.25	0.625	0.333	0.167	0.5	0.444
Saudi Arabia	SAU	2018	80	60.7333	45.9	78.975	30	59.1217	0.8	0.5	0.322	1	0.392	0.5125	0.5835	0.375	1	0.868	1	0.291	-99	0.3	-99	1	0	1	1	1	0.5	0.52	0.538	0.263	0.288	0	0.322	1	0.143	0.333	0.762	0.364	0.25	0.5	0.8	0.333	0.375	0.4	0.667	0.5	0.667
Bangladesh	BGD	2018	90	61.6	69.5625	48.9417	25	59.0208	0.9	0.5	0.348	1	0.749667	0.686	0.6945	0.5635	0.666667	0.666	0.5	0.125	-99	0.25	-99	0.5	1	1	1	1	0.5	0.113	0.896	0.183	0.546	0	0.348	1	0.714	0.889	0.85	0.545	0.5	1	0.933	0.583	0.5	0.75	0.6	0.75	0.889
Paraguay	PRY	2018	70	63.0667	76.8438	44.95	40	58.9721	0.7	0.5	0.392	1	0.791667	0.661167	0.9445	0.8445	1	0.668	0	0.13	-99	0.4	-99	1	0	1	1	0.5	0.5	0.198	0.872	0.232	0.49	0.167	0.392	1	1	0.8	0.905	0.545	0.5	1	0.8	0.583	0.667	0.75	0.667	0.5	0.889
Jordan	JOR	2018	80	80.8333	69.825	47.925	15	58.7167	0.8	1	0.425	1	0.6765	0.645833	0.9445	0.6745	0.5	0.6	0.5	0.317	-99	0.15	-99	0	1	1	1	1	1	0.42	0.915	0.453	0.336	0	0.425	1	0.571	0.667	0.81	0.636	0.375	1	0.8	0.5	0.625	0.4	0.8	0.75	0.889
Samoa	WSM	2018	90	63.5	59.7188	34.6167	45	58.5671	0.9	0.5	0.405	1	0.570333	0.522167	0.9445	0.5555	0.666667	0.466	0	0.252	-99	0.45	-99	0.5	1	1	1	1	0.5	0.302	0.896	0.216	0.43	0.18	0.405	1	0.571	0.778	0.667	0.364	0.375	0.667	0.8	0.333	0.333	0.5	0.667	0.5	0.889
Belize	BLZ	2018	80	62.2667	54.5063	65.7417	30	58.5029	0.8	0.5	0.368	1	0.563	0.536	0.4445	0.619	0.666667	0.666	1	0.297	-99	0.3	-99	0	1	1	1	1	0.5	0.304	0.782	0.269	0.485	0	0.368	1	0.286	0.667	0.905	0.545	0.375	0.6	0.933	0.667	0.333	0.333	0.2	0.75	0.889
Fiji	FJI	2018	80	59.5	54.8062	46.4	50	58.1412	0.8	0.5	0.285	1	0.523333	0.502833	0.6945	0.6115	0.5	0.334	1	0.022	-99	0.5	-99	0.5	1	1	0.5	1	0.5	0.19	0.649	0.311	0.277	0	0.285	1	0.571	0.444	0.81	0.273	0.375	0.667	0.867	0.417	0.333	0.4	0.5	0.5	0.889
Tanzania	TZA	2018	76.6	60.7	73.5312	39.275	40	58.0213	0.766	0.5	0.321	1	0.756333	0.681333	0.9445	0.625	0.5	0.868	0	0.203	-99	0.4	-99	0.5	1	0.33	1	1	0.5	0.105	0.771	0.343	0.386	0	0.321	1	0.857	0.9	0.667	0.364	0.75	1	0.8	0.538	0.5	0.75	1	0.5	0.889
Panama	PAN	2018	80	62.8	66.825	59.9167	20	57.9083	0.8	0.5	0.384	1	0.7025	0.665333	0.6945	0.548	0.666667	0.466	1	0.264	-99	0.2	-99	1	0	1	1	1	0.5	0.532	0.763	0.163	0.461	0	0.384	1	0.857	0.7	0.905	0.545	0.375	0.833	0.8	0.667	0.625	0.6	0.8	0.5	0.889
Oman	OMN	2018	100	44.4	44.3813	64.225	35	57.6013	1	0.5	0.832	0	0.536667	0.3835	0.3335	0.4565	1	0.334	1	0.235	-99	0.35	-99	1	1	1	1	1	0.5	0.867	0.867	0.83	0.729	0.867	0.832	0	0	0.7	0.857	0.455	0.375	0.833	0.8	0.167	0.5	0.167	0.167	0.5	0.667
Cameroon	CMR	2018	80	61.5667	75.8	34.625	35	57.3983	0.8	0.5	0.347	1	0.753833	0.707333	0.9445	0.736	0.5	0.6	0	0.285	-99	0.35	-99	0.5	1	1	1	0.5	0.5	0.207	0.843	0.296	0.391	0	0.347	1	1	0.667	0.762	0.636	0.625	0.833	0.933	0.667	0.444	0.4	0.8	1	0.889
Cote d'Ivoire	CIV	2018	90	59.9	69.325	37.1667	30	57.2783	0.9	0.5	0.297	1	0.7555	0.620833	0.6945	0.7225	0.666667	0.734	0	0.086	-99	0.3	-99	0.5	1	1	1	1	0.5	0.171	0.612	0.353	0.348	0	0.297	1	0.857	0.778	0.762	0.636	0.5	1	0.933	0.667	0.625	0.4	0.6	0.5	0.889
Iran, Islamic Rep.	IRN	2018	80	59.8	52.8438	57.0167	35	56.9321	0.8	0.5	0.294	1	0.5725	0.5305	0.4445	0.474	0.666667	0.4	1	0.214	-99	0.35	-99	1	0	1	1	1	0.5	0.16	0.754	0.137	0.421	0	0.294	1	0.429	0.444	0.857	0.455	0.25	1	0.933	0.333	0.75	0.5	0.167	0.5	0.889
Niger	NER	2018	90	61.9667	63.4875	37.275	30	56.5458	0.9	0.5	0.359	1	0.673833	0.5165	0.9445	0.5635	0.5	0.668	0	0.323	-99	0.3	-99	0.5	1	1	1	1	0.5	0.183	0.867	0.259	0.485	0	0.359	1	1	0.778	0.762	0.545	0.125	0.833	0.8	0.333	0.333	0.333	0.8	0.5	0.889
Cambodia	KHM	2018	70	59.2	66.975	46.375	40	56.51	0.7	0.5	0.276	1	0.6805	0.641667	0.6945	0.697	1	0.734	0	0.121	-99	0.4	-99	0	1	1	1	0.5	0.5	0.205	0.572	0.262	0.338	0	0.276	1	0.571	0.667	0.8	0.545	0.5	1	0.933	0.417	0.75	0.4	0.6	0.75	0.889
Botswana	BWA	2018	60	66.5667	66.0438	54.7917	35	56.4804	0.6	0.5	0.497	1	0.634667	0.6265	0.9445	0.5555	0.666667	0.4	1	0.125	-99	0.35	-99	0.5	0	1	1	0.5	0.5	0.037	0.859	0.34	0.448	0.798	0.497	1	0.857	0.7	0.762	0.364	0.125	1	0.8	0.417	0.375	0.75	0.667	0.75	0.889
Lesotho	LSO	2018	80	63.2667	55.5875	39.6667	40	55.7042	0.8	0.5	0.398	1	0.599	0.494333	0.4445	0.7225	0.666667	0.734	0	0.186	-99	0.4	-99	0	1	1	1	1	0.5	0.228	0.782	0.396	0.583	0	0.398	1	0.429	0.778	0.667	0.545	0.375	0.8	0.933	0.333	0.5	0.5	0.2	0.5	0.889
China	CHN	2018	83.4	46.4	60.4312	32.45	55	55.5363	0.834	1	0.392	0	0.613	0.640333	0.6945	0.38	0.5	0.4	0	0.398	-99	0.55	-99	1	1	0.67	1	0.5	1	0	0.889	0.647	0.426	0	0.392	0	0.714	0.6	0.75	0.364	0.25	1	0.8	0.25	0.625	0.75	0.667	0.75	0.889
Tajikistan	TJK	2018	90	31.3667	64.275	41.9417	50	55.5167	0.9	0.5	0.441	0	0.6735	0.525667	0.9445	0.6	0.666667	0.468	0.5	0.043	-99	0.5	-99	0.5	1	1	1	1	0.5	0.389	0.542	0.439	0.387	0.448	0.441	0	1	0.625	0.81	0.273	0.5	0.833	0.8	0.231	0.556	0.4	0.667	0.5	0.889
Jamaica	JAM	2018	60	73.7333	56.2687	56.6	30	55.3204	0.6	0.5	0.712	1	0.594833	0.535167	0.4445	0.667	0.5	0.6	1	0.164	-99	0.3	-99	0	0	1	1	1	0.5	0.599	0.91	0.609	0.604	0.838	0.712	1	0.429	0.667	0.81	0.455	0.375	0.833	0.8	0.417	0.444	0.4	0.4	0.75	0.889
Angola	AGO	2018	80	57.3	69.9938	28.8667	40	55.2321	0.8	0.5	0.219	1	0.7045	0.659333	0.9445	0.5635	0.666667	0.466	0	0.022	-99	0.4	-99	0.5	1	1	1	0.5	0.5	0.076	0.546	0.221	0.254	0	0.219	1	0.857	0.778	0.714	0.545	0.5	0.833	0.933	0.417	0.556	0.5	0.8	0.75	0.889
Kenya	KEN	2018	70	60.4667	68.5563	35.7917	40	54.9629	0.7	0.5	0.314	1	0.7665	0.570833	0.6945	0.778	0.666667	0.534	0	0.231	-99	0.4	-99	0	1	1	1	0.5	0.5	0.052	0.886	0.15	0.485	0	0.314	1	0.857	0.9	0.762	0.455	0.625	1	0.933	0.417	0.375	0.4	0.8	0.5	0.889
Mozambique	MOZ	2018	80	57.6333	69.2313	32.0083	35	54.7746	0.8	0.5	0.229	1	0.701833	0.597333	0.9445	0.6965	0.833333	0.268	0	0.179	-99	0.35	-99	0.5	1	1	1	0.5	0.5	0.132	0.617	0.061	0.334	0	0.229	1	1	0.8	0.714	0.364	0.5	0.833	0.8	0.417	0.667	0.4	0.8	0.5	0.889
Mali	MLI	2018	80	63.1	64.125	35.7083	30	54.5867	0.8	0.5	0.393	1	0.7045	0.573167	0.639	0.658	0.333333	0.866	0	0.229	-99	0.3	-99	0	1	1	1	1	0.5	0.32	0.782	0.387	0.31	0.167	0.393	1	0.571	0.8	0.762	0.636	0.625	0.833	0.8	0.583	0.556	0.4	0.6	0.5	0.778
Cabo Verde	CPV	2018	80	59.3333	59.0312	54.4167	20	54.5562	0.8	0.5	0.28	1	0.595833	0.588833	0.6945	0.474	0.666667	0.4	1	0.11	-99	0.2	-99	0	1	1	1	1	0.5	0.393	0.314	0.25	0.443	0	0.28	1	0.857	0.556	0.857	0.455	0.25	0.6	0.8	0.5	0.333	0.4	0.5	1	0.889
Burundi	BDI	2018	80	61.7	72.6375	23.1333	35	54.4942	0.8	0.5	0.351	1	0.7515	0.627333	0.9445	0.73	0.333333	0.4	0	0.192	-99	0.35	-99	0.5	1	1	1	0.5	0.5	0.085	0.83	0.343	0.496	0	0.351	1	0.857	0.667	0.8	0.727	0.625	0.833	0.933	0.615	0.333	0.333	0.8	0.75	0.889
Nepal	NPL	2018	80	61.3333	69.6875	38.4583	20	53.8958	0.8	0.5	0.34	1	0.755833	0.574	0.9445	0.641	0.833333	0.666	0	0.039	-99	0.2	-99	0	1	1	1	1	0.5	0.048	0.83	0.269	0.555	0	0.34	1	0.714	0.889	0.762	0.545	0.625	1	0.8	0.5	0.444	0.4	0.8	0.5	0.889
Malawi	MWI	2018	90	61.2333	68.3312	34.675	15	53.8479	0.9	0.5	0.337	1	0.706	0.5605	0.9445	0.7225	0.5	0.734	0	0.153	-99	0.15	-99	0.5	1	1	1	1	0.5	0.207	0.599	0.225	0.315	0.339	0.337	1	1	0.9	0.714	0.455	0.5	0.667	0.933	0.308	0.222	0.6	0.8	0.5	0.889
Eswatini	SWZ	2018	90	55.7667	67.1688	15.6417	40	53.7154	0.9	0.5	0.173	1	0.687667	0.612167	0.9445	0.5295	0.166667	0.334	0	0.125	-99	0.4	-99	0.5	1	1	1	1	0.5	0	0.424	0.212	0.231	0	0.173	1	0.714	0.778	0.714	0.545	0.375	1	0.8	0.417	0.556	0.6	0.8	0.5	0.889
Burkina Faso	BFA	2018	80	59.5667	66.475	27.3583	35	53.68	0.8	0.5	0.287	1	0.673833	0.612833	0.9445	0.5135	0.333333	0.532	0	0.229	-99	0.35	-99	0	1	1	1	1	0.5	0.019	0.763	0.273	0.381	0	0.287	1	1	0.778	0.762	0.545	0.125	0.833	0.933	0.417	0.444	0.333	0.8	0.75	0.889
Ethiopia	ETH	2018	90	59.9667	71.3812	31.6167	15	53.5929	0.9	0.5	0.299	1	0.7815	0.603333	0.9445	0.6115	0.166667	0.934	0	0.164	-99	0.15	-99	0.5	1	1	1	1	0.5	0	0.726	0.273	0.494	0	0.299	1	1	0.9	0.8	0.364	0.625	1	0.933	0.231	0.556	0.6	0.8	0.5	0.889
Sierra Leone	SLE	2018	90	65.2333	64.225	26.6083	20	53.2133	0.9	0.5	0.457	1	0.699833	0.549167	0.6945	0.6965	0.333333	0.466	0	0.265	-99	0.2	-99	0.5	1	1	1	1	0.5	0	0.83	0.391	0.651	0.415	0.457	1	0.571	0.778	0.714	0.636	0.5	1	0.8	0.462	0.333	0.6	0.6	0.5	0.889
Bahrain	BHR	2018	90	64.2667	41.6875	38.1333	30	52.8175	0.9	0.5	0.428	1	0.403667	0.49	0.278	0.376	0.333333	0.066	1	0.126	-99	0.3	-99	1	1	1	1	0.5	0.5	0.604	0.783	0.314	0.439	0	0.428	1	0	0.375	0.8	0.455	0.125	0.667	1	0.231	0.625	0.167	0.167	0.75	0.556
Algeria	DZA	2018	70	60.1333	51.175	52.4167	30	52.745	0.7	0.5	0.304	1	0.460167	0.561167	0.4445	0.5855	0.666667	0.266	1	0.164	-99	0.3	-99	0	1	1	0.5	1	0.5	0.099	0.68	0.317	0.402	0.024	0.304	1	0.286	0.444	0.75	0.364	0.25	0.667	0.8	0.5	0.75	0.4	0.167	0.75	0.889
Suriname	SUR	2018	60	62.4333	47	54.1167	40	52.71	0.6	0.5	0.373	1	0.490167	0.432333	0.4445	0.548	0.666667	0.334	1	0.164	-99	0.4	-99	0	1	0	1	1	0.5	0.329	0.775	0.387	0.35	0.024	0.373	1	0.143	0.444	0.857	0.455	0.375	0.667	0.8	0.25	0.444	0.4	0.2	0.5	0.889
Bahamas, The	BHS	2018	100	60.6333	34.8625	27.4833	40	52.5958	1	0.5	0.319	1	0.279	0.409833	0.278	0.4445	0.333333	0.266	0.5	0	-99	0.4	-99	1	1	1	1	1	0.5	0	0.83	0.23	0.538	0	0.319	1	0	0.143	0.8	0.273	0.125	0.333	1	0.25	0.125	0.167	0.167	0.75	0.556
Qatar	QAT	2018	100	28.6333	47.4062	60.7667	25	52.3612	1	0.5	0.359	0	0.429833	0.5015	0.528	0.4705	0.666667	0.6	1	0.164	-99	0.25	-99	1	1	1	1	1	0.5	0.305	0.849	0.141	0.5	0	0.359	0	0.286	0.25	0.762	0.364	0.25	0.667	0.8	0.25	0.625	0.167	0.667	0.5	0.556
Bhutan	BTN	2018	80	59.2333	68.2188	33.775	20	52.2454	0.8	0.5	0.277	1	0.7145	0.594667	0.9445	0.5855	0.5	0.534	0	0.317	-99	0.2	-99	1	0	1	1	1	0.5	0.042	0.793	0.098	0.452	0	0.277	1	1	0.667	0.7	0.545	0.375	1	0.933	0.385	0.333	0.5	0.667	0.75	0.889
Namibia	NAM	2018	70	63.0667	65.3	32.5417	30	52.1817	0.7	0.5	0.392	1	0.564333	0.672333	0.9445	0.5695	0.666667	0.4	0	0.235	-99	0.3	-99	0.5	1	0	1	1	0.5	0.316	0.745	0.415	0.485	0	0.392	1	0.714	0.7	0.667	0.455	0.25	0.6	0.8	0.417	0.667	0.6	0.8	0.75	0.889
Timor-Leste	TLS	2018	50	58.2333	60.45	32.7083	55	51.2783	0.5	0.5	0.247	1	0.649167	0.4805	0.6945	0.7525	0.333333	0.734	0	0.241	-99	0.55	-99	0.5	0	0	1	1	0.5	0	0.649	0.131	0.457	0	0.247	1	0.857	0.444	0.714	0.455	0.625	0.8	0.8	0.417	0.333	0.333	0.5	0.5	0.889
Uzbekistan	UZB	2018	70	39.3333	49.9562	31.775	65	51.2129	0.7	0	0.18	1	0.528	0.4945	0.4445	0.4845	0	0.2	1	0.071	-99	0.65	-99	0	1	1	1	0.5	0	0.119	0.45	0.183	0.151	0	0.18	1	0.286	0.75	0.81	0.364	0.125	0.833	0.8	0.333	0.667	0.5	0.167	0.5	0.889
St. Lucia	LCA	2018	80	55.9333	46.3937	47.5	25	50.9654	0.8	0.5	0.178	1	0.4745	0.445333	0.4445	0.5075	0.5	0.4	1	0	-99	0.25	-99	0	1	1	1	1	0.5	0.024	0.554	0.289	0.024	0	0.178	1	0.429	0.5	0.762	0.364	0.125	0.667	0.8	0.167	0.222	0.333	0.4	0.75	0.889
Maldives	MDV	2018	70	29.8667	64.675	49.1333	40	50.735	0.7	0.5	0.396	0	0.721	0.5195	0.889	0.5635	0.333333	0.468	1	0.164	-99	0.4	-99	0	1	1	1	0.5	0.5	0.641	0.763	0.142	0.433	0	0.396	0	1	0.375	0.857	0.636	0.625	0.833	0.8	0.417	0.333	0.4	0.667	0.5	0.778
Madagascar	MDG	2018	90	56.3	61.9625	12.675	30	50.1875	0.9	0.5	0.189	1	0.6355	0.5815	0.6945	0.6115	0	0.468	0	0.039	-99	0.3	-99	0.5	1	1	1	1	0.5	0	0.512	0.194	0.238	0	0.189	1	0.429	0.778	0.762	0.636	0.375	0.833	0.933	0.5	0.556	0.4	0.6	0.5	0.889
Benin	BEN	2018	70	58.3	58.5312	33.8167	30	50.1296	0.7	0.5	0.249	1	0.671167	0.522167	0.389	0.7135	0.666667	0.6	0	0.086	-99	0.3	-99	0.5	1	1	1	0	0.5	0.217	0.514	0.258	0.254	0	0.249	1	0.571	0.667	0.762	0.727	0.5	0.8	0.933	0.417	0.333	0.5	0.2	0.75	0.778
Afghanistan	AFG	2018	70	59.9	68.75	15.575	35	49.845	0.7	0.5	0.297	1	0.693	0.6125	0.9445	0.639	0	0.466	0	0.157	-99	0.35	-99	0	1	1	1	0.5	0.5	0.198	0.729	0.179	0.38	0	0.297	1	0.714	0.889	0.8	0.455	0.5	0.8	0.933	0.417	0.375	0.4	0.8	0.75	0.889
Nigeria	NGA	2018	56.6	62.4	54.8687	34.8	40	49.7338	0.566	0.5	0.372	1	0.591833	0.491667	0.4445	0.6945	0.5	0.532	0	0.36	-99	0.4	-99	0	1	0.33	1	0.5	0.5	0.214	0.867	0.339	0.439	0	0.372	1	0.286	0.778	0.714	0.273	0.5	1	0.8	0.417	0.333	0.5	0.4	0.5	0.889
Sao Tome and Principe	STP	2018	60	58.0667	47.125	48.3667	35	49.7117	0.6	0.5	0.242	1	0.5105	0.384167	0.4445	0.6415	0.666667	0.268	1	0	-99	0.35	-99	0	1	1	1	0	0.5	0.411	0.411	0.387	0	0	0.242	1	0.429	0.5	0.762	0.455	0.25	0.667	0.8	0.25	0.222	0.333	0.2	0.5	0.889
Nicaragua	NIC	2018	90	60.0333	49.7125	27.875	20	49.5242	0.9	0.5	0.301	1	0.473667	0.4815	0.4445	0.667	0.5	0.468	0	0.147	-99	0.2	-99	0.5	1	1	1	1	0.5	0.262	0.65	0.161	0.433	0	0.301	1	0.571	0.444	0.762	0.273	0.125	0.667	0.8	0.333	0.556	0.5	0.2	0.5	0.889
Lao PDR	LAO	2018	90	39.9667	53.8937	40.5333	20	48.8787	0.9	0	0.199	1	0.607	0.459667	0.4445	0.667	0.833333	0.6	0	0.188	-99	0.2	-99	0.5	1	1	1	1	0	0.037	0.576	0.037	0.345	0	0.199	1	0.286	0.625	0.762	0.636	0.5	0.833	0.933	0.417	0.375	0.333	0.2	0.5	0.889
Gambia, The	GMB	2018	60	61.8667	64.6875	31.6417	25	48.6392	0.6	0.5	0.356	1	0.709833	0.531	0.889	0.5635	0.666667	0.534	0	0.065	-99	0.25	-99	0	1	1	1	0	0.5	0.095	0.83	0.439	0.415	0	0.356	1	1	0.625	0.714	0.545	0.375	1	0.933	0.231	0.222	0.5	0.8	0.5	0.778
Trinidad and Tobago	TTO	2018	60	60.6	44.2313	42.7583	35	48.5179	0.6	0.5	0.318	1	0.377167	0.437167	0.5835	0.512	0.333333	0.334	1	0.043	-99	0.35	-99	0	0	1	1	1	0.5	0.493	0.524	0.397	0.174	0	0.318	1	0.143	0.444	0.619	0.182	0.375	0.5	0.8	0.167	0.556	0.2	0.4	0.5	0.667
Seychelles	SYC	2018	40	46.4667	51.1688	53.8667	50	48.3004	0.4	1	0.394	0	0.4675	0.494333	0.6945	0.5135	0.666667	0.466	1	0.022	-99	0.5	-99	0	0	1	1	0	1	0.326	0.739	0.34	0.519	0.048	0.394	0	0.429	0.5	0.762	0.364	0.25	0.5	0.8	0.333	0.5	0.333	0.5	0.5	0.889
Liberia	LBR	2018	90	28.8333	56.8813	34.8167	30	48.1063	0.9	0.5	0.365	0	0.568833	0.559167	0.6945	0.472	0.666667	0.534	0	0.192	-99	0.3	-99	1	1	1	1	0.5	0.5	0.329	0.763	0.352	0.381	0	0.365	0	0.714	0.667	0.619	0.455	0.125	0.833	0.933	0.5	0.222	0.4	0.8	0.5	0.889
Mauritania	MRT	2018	70	62.4667	50.5438	25.0833	25	46.6187	0.7	0.5	0.374	1	0.621	0.402667	0.4445	0.528	0.333333	0.534	0	0.136	-99	0.25	-99	0.5	0	1	1	1	0.5	0.211	0.859	0.32	0.481	0	0.374	1	0.571	0.778	0.714	0.455	0.375	0.833	0.8	0.333	0.25	0.333	0.2	0.5	0.889
Lebanon	LBN	2018	40	62.6	56.9062	47.7083	20	45.4429	0.4	0.5	0.378	1	0.5815	0.458333	0.9445	0.4885	0.333333	0.334	1	0.241	-99	0.2	-99	0	0	1	1	0	0.5	0.702	0.607	0.225	0.358	0	0.378	1	0.714	0.667	0.619	0.364	0.125	1	0.6	0.25	0.333	0.4	0.667	0.5	0.889
Venezuela, RB	VEN	2018	46.6	59.9	53.775	39.9167	25	45.0383	0.466	0.5	0.297	1	0.504667	0.503333	0.6945	0.5835	0.666667	0.266	0.5	0.164	-99	0.25	-99	0	1	0.33	1	0	0.5	0.467	0.342	0.332	0.345	0	0.297	1	0.714	0.444	0.714	0.364	0.125	0.667	0.8	0.231	0.556	0.333	0.6	0.5	0.889
Haiti	HTI	2018	80	53	50.7125	20.85	20	44.9125	0.8	0.5	0.09	1	0.541333	0.436	0.4445	0.6805	0.5	0.334	0	0	-99	0.2	-99	1	1	1	1	0	0.5	0	0.238	0.095	0.119	0	0.09	1	0.286	0.556	0.8	0.273	0.5	0.833	0.933	0.25	0.333	0.4	0.2	0.5	0.889
St. Vincent and the Grenadines	VCT	2018	40	62.6667	47.4625	38.5583	35	44.7375	0.4	0.5	0.38	1	0.437333	0.420333	0.6945	0.5295	0.333333	0.066	1	0.143	-99	0.35	-99	0	1	1	0	0	0.5	0.31	0.751	0.435	0.387	0.019	0.38	1	0.429	0.444	0.762	0.364	0.125	0.5	0.8	0.167	0.222	0.333	0.5	0.5	0.889
Sudan	SDN	2018	53.4	57.9333	62.775	31.3167	15	44.085	0.534	0.5	0.238	1	0.634833	0.5235	0.9445	0.6025	0.666667	0.4	0	0.186	-99	0.15	-99	0	1	0.67	1	0	0.5	0	0.576	0.254	0.358	0	0.238	1	0.857	0.9	0.571	0.273	0.375	0.833	0.8	0.333	0.375	0.333	0.8	0.5	0.889
Solomon Islands	SLB	2018	60	60.4333	53	20.4333	20	42.7733	0.6	0.5	0.313	1	0.515167	0.431	0.6945	0.707	0.333333	0.266	0	0.218	-99	0.2	-99	0	1	1	0.5	0.5	0.5	0.098	0.635	0.306	0.527	0	0.313	1	0.429	0.667	0.714	0.364	0.25	0.667	0.8	0.231	0.222	0.333	0.5	0.5	0.889
Guyana	GUY	2018	60	57.4333	51.0375	18.8833	25	42.4708	0.6	0.5	0.223	1	0.553667	0.477667	0.3335	0.6555	0.333333	0.4	0	0.022	-99	0.25	-99	0	1	1	0	1	0.5	0	0.53	0.265	0.322	0	0.223	1	0.143	0.75	0.857	0.364	0.375	0.833	0.933	0.5	0.333	0.4	0.2	0.5	0.667
Guinea-Bissau	GNB	2018	60	60.6	50.075	17.7583	20	41.6867	0.6	0.5	0.318	1	0.492	0.473	0.639	0.472	0.333333	0.334	0	0.043	-99	0.2	-99	0	1	1	1	0	0.5	0.248	0.641	0.314	0.387	0	0.318	1	0.429	0.625	0.65	0.273	0.375	0.6	0.933	0.25	0.222	0.333	0.6	0.5	0.778
Papua New Guinea	PNG	2018	60	55.2667	51.075	18.2833	20	40.925	0.6	0.5	0.158	1	0.472167	0.4685	0.6945	0.5695	0.333333	0.2	0	0.198	-99	0.2	-99	0	1	1	1	0	0.5	0.048	0.424	0.142	0.179	0	0.158	1	0.429	0.286	0.762	0.273	0.25	0.833	0.8	0.167	0.444	0.4	0.5	0.5	0.889
Congo, Dem. Rep.	COD	2018	53.4	59.6	50.2563	18.175	20	40.2863	0.534	0.5	0.288	1	0.545667	0.470333	0.4445	0.528	0	0.466	0	0.261	-99	0.2	-99	0	1	0.67	1	0	0.5	0.09	0.696	0.282	0.372	0	0.288	1	0.286	0.5	0.7	0.455	0.5	0.833	0.933	0.231	0.625	0.333	0.2	0.5	0.889
Guinea	GIN	2018	56.6	61.4	55.9312	20.9083	5	39.9679	0.566	0.5	0.342	1	0.5705	0.464667	0.6945	0.6745	0.333333	0.334	0	0.169	-99	0.05	-99	0.5	1	0.33	1	0	0.5	0	0.933	0.311	0.467	0	0.342	1	0.286	0.625	0.667	0.545	0.5	0.8	0.933	0.333	0.222	0.4	0.4	0.5	0.889
Vanuatu	VUT	2018	53.4	59.1333	46.4125	23.6	15	39.5092	0.534	0.5	0.274	1	0.422	0.4315	0.6945	0.458	0.5	0.334	0	0.11	-99	0.15	-99	0	1	0.67	1	0	0.5	0.099	0.659	0.225	0.385	0	0.274	1	0.571	0.25	0.571	0.182	0.125	0.833	0.8	0.167	0.222	0.4	0.5	0.5	0.889
Yemen, Rep.	YEM	2018	80	25.5333	43.55	20.4167	25	38.9	0.8	0.5	0.266	0	0.431667	0.454833	0.4445	0.38	0.166667	0.402	0	0.248	-99	0.25	-99	0	1	1	1	1	0.5	0.825	0.14	0.117	0.129	0.117	0.266	0	0.429	0.143	0.571	0.364	0.25	0.833	0.8	0.385	0.444	0.4	0.2	0.5	0.889
Djibouti	DJI	2018	40	60.3667	40.75	24.3917	20	37.1017	0.4	0.5	0.311	1	0.4085	0.379333	0.4445	0.452	0.666667	0.266	0	0.043	-99	0.2	-99	0	0	1	1	0	0.5	0.093	0.689	0.168	0.321	0.284	0.311	1	0.429	0.375	0.667	0.455	0.125	0.4	0.867	0.154	0.222	0.333	0.2	0.5	0.889
Congo, Rep.	COG	2018	60	27.9333	48.225	27.15	20	36.6617	0.6	0.5	0.338	0	0.523	0.445667	0.4445	0.5075	0.5	0.334	0	0.252	-99	0.2	-99	0	1	1	1	0	0.5	0	0.793	0.372	0.525	0	0.338	0	0.143	0.667	0.714	0.364	0.25	1	0.933	0.308	0.333	0.4	0.2	0.5	0.889
Iraq	IRQ	2018	40	25	60.3312	22.0583	30	35.4779	0.4	0.5	0.25	0	0.580833	0.567667	0.9445	0.4365	0.333333	0.4	0	0.149	-99	0.3	-99	0.5	0	0	1	0.5	0.5	0.048	0.745	0.231	0.225	0	0.25	0	0.571	0.667	0.857	0.182	0.375	0.833	0.8	0.417	0.556	0.333	0.8	0.5	0.889
Chad	TCD	2018	56.6	18.2	52.5	15.5833	15	31.5767	0.566	0.5	0.046	0	0.603	0.4735	0.4445	0.526	0.333333	0.268	0	0.022	-99	0.15	-99	0	1	0.33	1	0.5	0.5	0.037	0.085	0.042	0.066	0	0.046	0	0.143	0.667	0.714	0.636	0.625	0.833	0.933	0.308	0.5	0.4	0.2	0.5	0.889
Gabon	GAB	2018	40	23.7333	40.8438	13.2833	20	27.5721	0.4	0.5	0.212	0	0.407667	0.417667	0.389	0.4025	0.333333	0.198	0	0	-99	0.2	-99	0	0	1	1	0	0.5	0.143	0.422	0.247	0.247	0	0.212	0	0.429	0.444	0.524	0.091	0.125	0.833	0.8	0.231	0.375	0.4	0.2	0.5	0.778
Syrian Arab Republic	SYR	2018	26.6	24.8333	35.7687	17.7417	25	25.9887	0.266	0.5	0.245	0	0.278167	0.423833	0.4445	0.311	0.166667	0.4	0	0.143	-99	0.25	-99	0	0	0.33	1	0	0.5	0.33	0.549	0.071	0.275	0	0.245	0	0	0.286	0.667	0.091	0.125	0.5	0.8	0.154	0.556	0.333	0.2	0.5	0.889
South Sudan	SSD	2018	20	8.43333	45.9875	19.0583	30	24.6958	0.2	0	0.253	0	0.442167	0.4615	0.6945	0.2735	0.333333	0.198	0	0.231	-99	0.3	-99	0	0	0	1	0	0	0.133	0.557	0.278	0.297	0	0.253	0	0.571	0.375	0.476	0.273	0.125	0.833	0.8	0.25	0.333	0.286	0.6	0.5	0.889
Micronesia, Fed. Sts.	FSM	2018	20	25.6333	44.8625	16.7833	15	24.4558	0.2	0.5	0.269	0	0.401833	0.4665	0.6945	0.2895	0.333333	0.134	0	0.204	-99	0.15	-99	0	0	0	1	0	0.5	0.331	0.53	0.241	0.241	0	0.269	0	0.286	0.286	0.524	0.273	0.375	0.667	0.8	0.333	0.333	0.333	0.5	0.5	0.889
Kiribati	KIR	2018	20	25.7667	45.9375	13.8833	15	24.1175	0.2	0.5	0.273	0	0.388667	0.4845	0.639	0.4165	0.333333	0.2	0	0.022	-99	0.15	-99	0	0	0	1	0	0.5	0.251	0.594	0.249	0.273	0	0.273	0	0.429	0.333	0.714	0.273	0.25	0.333	0.933	0.308	0.333	0.333	0.5	0.5	0.778
Libya	LBY	2018	20	20.6333	37.2875	19.125	20	23.4092	0.2	0.5	0.119	0	0.385167	0.363833	0.4445	0.2915	0.5	0.134	0	0.131	-99	0.2	-99	0	0	0	1	0	0.5	0	0	0.278	0.317	0	0.119	0	0.143	0.714	0.571	0.091	0.125	0.667	0.6	0.25	0.333	0.333	0.167	0.5	0.889
Turkmenistan	TKM	2018	46.6	0.633333	41.0187	11.6833	5	20.9871	0.466	0	0.019	0	0.401667	0.406833	0.4445	0.4115	0.333333	0.134	0	0	-99	0.05	-99	0	1	0.33	1	0	0	0	0.048	0.024	0.024	0	0.019	0	0.143	0.625	0.81	0.182	0.25	0.4	0.8	0.308	0.333	0.333	0.167	0.5	0.889
Marshall Islands	MHL	2018	20	24.1	44.2188	11.4833	5	20.9604	0.2	0.5	0.223	0	0.439	0.420333	0.639	0.3205	0.333333	0.066	0	0.06	-99	0.05	-99	0	0	0	1	0	0.5	0	0.53	0.241	0.344	0	0.223	0	0.429	0.571	0.429	0.455	0.25	0.5	0.8	0.167	0.222	0.333	0.5	0.5	0.778
Somalia	SOM	2018	16.6	36.0333	45.7625	0	0	19.6792	0.166	0	0.081	1	0.365167	0.458833	0.9445	0.2445	0	0	0	0	-99	0	-99	0	0	0.33	0.5	0	0	0.048	0.143	0.024	0.048	0.143	0.081	1	0.429	0.375	0.571	0.091	0.125	0.6	0.6	0.231	0.222	0.4	0.8	0.5	0.889
American Samoa	ASM	2018	30		19.2875				0.3	0			0.115333	0.154667	0.5835	0.1495			1		-99		-99	1	0	0	0.5	0	0								0.143	0	0.091	0	0.125	0.333	0.4	0	0.111	0	0.167	0.25	0.667
Andorra	AND	2018	60		26.1				0.6	0			0.241333	0.228667	0.3335	0.3445	0.333333	0.4	1		-99		-99	1	0	1	1	0	0								0	0	0.55	0.273	0.125	0.5	0.6	0.077	0.111	0.167	0.167	0.25	0.667
Antigua and Barbuda	ATG	2018	20		52.0688		20		0.2	0.5		0	0.484	0.550833	0.639	0.422	0.5	0.066	1		-99	0.2	-99	0	0	1	0	0	0.5							0	0.571	0.286	0.8	0.455	0.125	0.667	1	0.25	0.222	0.333	0.5	1	0.778
Aruba	ABW	2018	60		18.45				0.6	0.5			0.118	0.207333	0.278	0.222			1		-99		-99	1	0	1	1	0	0.5								0.143	0.125	0.091	0.182	0	0.167	0.8	0.083	0.111	0	0	0.25	0.556
Barbados	BRB	2018	80		50.425		25		0.8	0.5		0	0.424	0.527833	0.778	0.4005	0.333333	0.134	1		-99	0.25	-99	1	0	1	1	1	0.5							0	0.429	0.125	0.8	0.273	0.25	0.667	1	0.333	0.25	0.167	0.667	0.75	0.556
Bermuda	BMU	2018	60		16.2125				0.6	0			0.14	0.129333	0.278	0.211			1		-99		-99	1	0	1	1	0	0								0.143	0	0.091	0.273	0	0.333	0.4	0.154	0.222	0	0	0	0.556
British Virgin Islands	VGB	2018	40		15.6937				0.4	0			0.096	0.194167	0.278	0.107			1		-99		-99	1	0	1	0	0	0								0	0	0.045	0.364	0	0.167	0.4	0.154	0.111	0	0	0.5	0.556
Brunei Darussalam	BRN	2018	100		40.0562		40		1	0.5		0	0.329833	0.5055	0.3335	0.365	0.666667	0.334	1		-99	0.4	-99	1	1	1	1	1	0.5							0	0	0.222	0.762	0.545	0.25	0.2	1	0.583	0.333	0.2	0.167	0.75	0.667
Cayman Islands	CYM	2018	40		17.3				0.4	0			0.0808333	0.206333	0.278	0.2445			1		-99		-99	1	0	1	0	0	0								0	0	0.045	0.273	0	0.167	0.8	0.077	0.111	0	0	0.25	0.556
Central African Republic	CAF	2018	20		48.3438		15		0.2	0.5		0	0.485667	0.452333	0.6945	0.359	0.166667	0.2	0		-99	0.15	-99	0	0	1	0	0	0.5							0	0.429	0.625	0.571	0.364	0.125	0.8	0.8	0.231	0.25	0.333	0.6	0.5	0.889
Channel Islands	CHI	2018	60						0.6	0											-99		-99	1	0	1	1	0	0
Comoros	COM	2018	60		54.6125		25		0.6	0.5		0	0.4715	0.5305	0.9445	0.4185	0.166667	0.334	0		-99	0.25	-99	0	0	1	1	1	0.5							0	0.714	0.143	0.667	0.455	0.25	0.6	0.8	0.417	0.333	0.333	0.8	0.5	0.889
Cuba	CUB	2018	70		49.2687				0.7	0	0.306		0.536833	0.451	0.4445	0.5335			1	0.164	-99		-99	1	1	0	1	0.5	0	0.393	0.533	0.141	0.463	0	0.306		0.143	0.375	0.95	0.545	0.375	0.833	0.6	0.231	0.625	0.333	0.167	0.75	0.889
Curacao	CUW	2018	40		17.775				0.4	0			0.0638333	0.281833	0.278	0.107			1		-99		-99	1	0	1	0	0	0								0	0	0.091	0	0.125	0.167	0.8	0.308	0.333	0	0	0.25	0.556
Dominica	DMA	2018	20		46.4688		35		0.2	0.5		0	0.436667	0.420333	0.639	0.5075	0.666667	0.2	1		-99	0.35	-99	0	0	1	0	0	0.5							0	0.429	0.444	0.5	0.455	0.125	0.667	0.8	0.167	0.222	0.333	0.5	0.5	0.778
Equatorial Guinea	GNQ	2018	0		45.3937		25		0	0		1	0.393167	0.479333	0.6945	0.3195	0.666667	0.066	0		-99	0.25	-99	0	0	0	0	0	0							1	0.429	0.25	0.524	0.364	0.125	0.667	1	0.154	0.222	0.4	0.6	0.5	0.889
Eritrea	ERI	2018	6.6		37.4438		10		0.066	0		0	0.3765	0.392333	0.4445	0.2445	0	0	0		-99	0.1	-99	0	0	0.33	0	0	0							0	0	0.429	0.65	0.455	0.125	0.6	0.8	0.154	0.333	0.4	0.167	0.5	0.889
Faroe Islands	FRO	2018	60		10.7188				0.6	0			0.0561667	0.0851667	0.278	0.1555			1		-99		-99	1	0	1	1	0	0								0	0.125	0.045	0	0	0.167	0.4	0	0.111	0	0	0	0.556
French Polynesia	PYF	2018	60		13.8812				0.6	0			0.036	0.175333	0.3335	0.143			1		-99		-99	1	0	1	1	0	0								0	0.125	0.091	0	0	0	0.6	0.077	0.125	0	0	0.25	0.667
Gibraltar	GIB	2018	60		12.1312				0.6	0			0.123667	0.103667	0.1665	0.122			1		-99		-99	1	0	1	1	0	0								0	0	0.045	0.364	0	0.333	0.4	0	0.222	0	0	0	0.333
Greenland	GRL	2018	50		11.9688				0.5	0			0.0706667	0.098	0.3335	0.118			1		-99		-99	1	0	1	0.5	0	0								0	0	0.091	0	0	0.333	0.4	0.077	0.111	0	0	0	0.667
Grenada	GRD	2018	50		43.7313		25		0.5	0.5		0	0.448833	0.406333	0.4445	0.4885	0.666667	0.266	1		-99	0.25	-99	0	1	1	0.5	0	0.5							0	0.143	0.375	0.762	0.455	0.125	0.833	0.8	0.25	0.222	0.333	0.333	0.5	0.889
Guam	GUM	2018	60		14.7812				0.6	0			0.0915	0.160167	0.278	0.1495			1		-99		-99	1	0	1	1	0	0								0	0	0.091	0	0.125	0.333	0.6	0	0.111	0	0	0.25	0.556
Hong Kong SAR, China	HKG	2018	80		27.6562				0.8	1	0.812		0.188167	0.3	0.3335	0.4145			1	0	-99		-99	1	0	1	1	1	1	0.893	0.943	0.567	0.726	0.933	0.812		0	0.25	0.091	0.455	0	0.333	0.6	0.25	0.5	0.2	0	0.25	0.667
Isle of Man	IMN	2018	60		10.275				0.6	0			0.0516667	0.109	0.1665	0.1735			1		-99		-99	1	0	1	1	0	0								0.143	0	0	0	0	0.167	0.4	0	0.111	0.143	0	0	0.333
Korea, Dem. People’s Rep.	PRK	2018	20		41.25				0.2	0			0.457833	0.394	0.4445	0.3			0		-99		-99	1	0	0	0	0	0								0	0.625	0.8	0.364	0.125	0.833	0.8	0.231	0.333	0.333	0.167	0.5	0.889
Kosovo	XKX	2018	40	66			55		0.4	0.5	0.48	1					0.666667	0.6		0	-99	0.55	-99	1	0	1	0	0	0.5	0.431	0.868	0.459	0.434	0.207	0.48	1
Liechtenstein	LIE	2018	60		24.2625				0.6	0	0.486		0.189667	0.231333	0.3335	0.3445			1	0.131	-99		-99	1	0	1	1	0	0	0.542	0.526	0.453	0.52	0.387	0.486		0.143	0.143	0.045	0.182	0.125	0.5	0.4	0.077	0.125	0.286	0	0.5	0.667
Macao SAR, China	MAC	2018	80		23.9312				0.8	0.5	0.424		0.1975	0.216667	0.278	0.394			1	0	-99		-99	1	0	1	1	1	0.5	0.615	0.652	0.19	0.431	0.231	0.424		0.143	0.25	0.045	0.455	0.125	0.167	0.6	0.167	0.333	0.2	0	0	0.556
Monaco	MCO	2018	60		26.6438				0.6	0			0.2225	0.215833	0.472	0.3445			1		-99		-99	1	0	1	1	0	0								0.143	0.143	0.333	0.091	0.125	0.5	0.2	0.077	0.125	0.143	0.5	0.25	0.444
Nauru	NRU	2018	20		32.5688		5		0.2	0		0	0.287167	0.362667	0.389	0.267	0.333333	0.134	1		-99	0.05	-99	0	0	0	1	0	0							0	0.143	0.143	0.524	0.455	0.125	0.333	0.8	0.154	0.222	0.333	0.167	0.5	0.778
New Caledonia	NCL	2018	70		16.3687				0.7	0			0.152333	0.139667	0.3335	0.1			1		-99		-99	1	0	1	1	0.5	0								0.143	0.222	0.091	0	0.125	0.333	0.4	0.077	0.111	0	0	0.25	0.667
Northern Mariana Islands	MNP	2018	60		10.7188				0.6	0			0.0915	0.0518333	0.3335	0.094			1		-99		-99	1	0	1	1	0	0								0	0	0.091	0	0.125	0.333	0.2	0	0.111	0	0	0	0.667
Palau	PLW	2018	30		37.0438		20		0.3	0.5		0	0.325333	0.394	0.389	0.4165	0.333333	0.134	1		-99	0.2	-99	0	0	1	0.5	0	0.5							0	0.286	0.286	0.524	0.273	0.25	0.333	0.8	0.231	0.333	0.333	0.167	0.5	0.778
Puerto Rico	PRI	2018	80		22.1875				0.8	0			0.156	0.235667	0.3335	0.2665			1		-99		-99	1	0	1	1	1	0								0	0.25	0.095	0.091	0	0.5	0.6	0.231	0.333	0	0	0.25	0.667
San Marino	SMR	2018	60		21.1187		55		0.6	0.5		1	0.234	0.1775	0.222	0.233			1		-99	0.55	-99	1	0	1	1	0	0.5							1	0	0.125	0.381	0.273	0.125	0.5	0.2	0.083	0.222	0.143	0.167	0.25	0.444
Sint Maarten (Dutch part)	SXM	2018	40		10.3938				0.4	0			0.0656667	0.098	0.278	0.0625			1		-99		-99	1	0	1	0	0	0								0	0	0.045	0.182	0	0.167	0.4	0.077	0.111	0	0	0	0.556
St. Kitts and Nevis	KNA	2018	20		32.5688		20		0.2	0.5		0	0.238	0.332333	0.528	0.3665	0.333333	0.132	1		-99	0.2	-99	0	0	1	0	0	0.5							0	0.143	0.125	0.429	0.273	0.125	0.333	0.8	0.083	0.111	0.167	0.333	0.5	0.556
St. Martin (French part)	MAF	2018	40		6.41875				0.4	0			0	0.0935	0.1665	0.0665			1		-99		-99	1	0	1	0	0	0								0	0	0	0	0	0	0.2	0	0.111	0	0	0.25	0.333
Taiwan, China	TWN	2018	40						0.4		0.605									0.169	-99		-99	1	0	0	0	1		0.811	0.811	0.462	0.523	0.415	0.605
Tonga	TON	2018	76.6		45.4813		35		0.766	0.5		1	0.3825	0.448167	0.6945	0.452	0.5	0.332	0		-99	0.35	-99	0.5	1	0.33	1	1	0.5							1	0.714	0.25	0.524	0.182	0.125	0.5	0.8	0.167	0.222	0.5	0.5	0.5	0.889
Turks and Caicos Islands	TCA	2018	60		12.9688				0.6	0			0.0303333	0.173	0.278	0.1495			1		-99		-99	1	0	1	1	0	0								0	0	0.091	0.091	0	0	0.6	0.077	0.111	0	0	0.25	0.556
Tuvalu	TUV	2018	10		35.1812		5		0.1	0.5		1	0.3405	0.394	0.3335	0.2775	0.333333	0.066	0		-99	0.05	-99	0	0	0	0.5	0	0.5							1	0.143	0.143	0.476	0.364	0.25	0.667	0.8	0.231	0.333	0.333	0.167	0.5	0.667
Virgin Islands (U.S.)	VIR	2018	60		9.29375				0.6	0			0.0075	0.126833	0.278	0.0625			1		-99		-99	1	0	1	1	0	0								0	0	0.045	0	0	0	0.4	0	0.111	0	0	0.25	0.556
Italy	ITA	2017	100	89.4667	77.0938	84.125	100	90.1371	1	1	0.684	1	0.720833	0.797833	1	0.6115	1	0.934	1	0.431	1	1	1	1	1	1	1	1	1	0.734	0.867	0.626	0.476	0.716	0.684	1	0.857	0.8	0.857	0.636	0.375	0.8	0.8	0.833	1	0.571	0.833	0.75	1
Australia	AUS	2017	100	94.5	76.5	74.3167	100	89.0633	1	1	0.835	1	0.733	0.751333	1	0.667	0.666667	1	1	0.306	1	1	1	1	1	1	1	1	1	0.952	0.398	0.911	0.915	1	0.835	1	1	0.778	0.9	0.545	0.375	0.8	0.8	0.75	0.875	0.5	0.833	0.75	1
Mexico	MEX	2017	100	94.8667	90.9375	82.8	75	88.7208	1	1	0.846	1	0.912833	0.901	1	0.8335	1	0.868	1	0.444	-99	0.75	-99	1	1	1	1	1	1	0.944	0.963	0.963	0.878	0.481	0.846	1	1	1	1	0.727	0.75	1	1	0.917	0.889	0.6	1	1	1
Sweden	SWE	2017	100	95.7333	75.1063	72.5167	100	88.6713	1	1	0.872	1	0.71	0.737167	1	0.667	0.666667	0.8	1	0.434	1	1	1	1	1	1	1	1	1	0.872	0.926	0.817	0.817	0.926	0.872	1	1	0.8	0.81	0.6	0.25	0.8	0.8	0.833	0.778	0.429	0.833	0.75	1
Finland	FIN	2017	100	96	76.2875	70.4417	100	88.5458	1	1	0.88	1	0.717833	0.779333	1	0.6115	0.666667	0.8	1	0.351	1	1	1	1	1	1	1	1	1	0.837	0.981	0.789	0.906	0.886	0.88	1	1	0.7	0.857	0.7	0.25	0.8	0.8	0.833	0.889	0.571	0.833	0.75	1
Slovenia	SVN	2017	100	94.2667	76.6312	70.6417	100	88.3079	1	1	0.828	1	0.7345	0.753333	1	0.667	0.666667	0.934	1	0.225	1	1	1	1	1	1	1	1	1	0.934	1	0.766	0.524	0.915	0.828	1	1	0.8	0.857	0.7	0.25	0.8	0.8	0.833	0.875	0.429	0.833	0.75	1
Austria	AUT	2017	100	86.9	74.5062	78.075	100	87.8962	1	1	0.607	1	0.6845	0.765167	1	0.6115	1	0.866	1	0.257	1	1	1	1	1	1	1	1	1	0.652	0.933	0.562	0.467	0.419	0.607	1	0.857	0.7	0.9	0.6	0.25	0.8	0.8	0.833	0.875	0.5	0.833	0.75	1
United States	USA	2017	100	90.5667	64.8375	80.1417	100	87.1092	1	1	0.717	1	0.609667	0.600667	0.9445	0.6115	0.666667	1	1	0.539	1	1	1	1	1	1	1	1	1	0.868	0.886	0.519	0.585	0.727	0.717	1	0.857	0.7	0.762	0.364	0.375	0.6	0.6	0.615	0.556	0.5	0.833	0.5	0.889
Switzerland	CHE	2017	100	85.9667	78.85	79.8	90	86.9233	1	1	0.579	1	0.746667	0.781833	1	0.7225	1	1	1	0.192	1	0.9	1	1	1	1	1	1	1	0.873	0.635	0.672	0.714	0	0.579	1	1	0.778	0.857	0.545	0.5	0.8	0.8	0.833	0.875	0.6	0.833	0.75	1
Spain	ESP	2017	100	87.6	74.6437	76.6917	95	86.7871	1	1	0.628	1	0.7	0.753333	1	0.6115	0.666667	1	1	0.401	1	0.95	1	1	1	1	1	1	1	0.704	0.878	0.474	0.703	0.378	0.628	1	0.857	0.8	0.857	0.636	0.25	0.8	0.8	0.833	0.875	0.429	0.833	0.75	1
France	FRA	2017	100	89.1667	75.6	67.8667	100	86.5267	1	1	0.675	1	0.741667	0.737167	1	0.6115	0.666667	0.934	1	0.114	1	1	1	1	1	1	1	1	1	0.656	0.646	0.33	0.778	0.967	0.675	1	1	0.8	0.9	0.7	0.25	0.8	0.8	0.833	0.778	0.429	0.833	0.75	1
Canada	CAN	2017	100	95.2333	64.1437	77.8667	95	86.4488	1	1	0.857	1	0.665	0.675	0.5	0.6115	0.666667	1	1	0.448	1	0.95	1	1	1	1	1	1	1	1	1	0.845	0.958	0.481	0.857	1	0.571	0.889	0.9	0.455	0.375	0.8	0.8	0.667	1	0.5	0.333	0.75	1
Portugal	PRT	2017	100	90.6333	71.0687	67.3167	100	85.8037	1	1	0.719	1	0.715667	0.725667	0.75	0.6115	0.666667	0.866	1	0.16	1	1	1	1	1	1	1	1	1	1	0.905	0.825	0.868	0	0.719	1	0.714	0.8	0.905	0.7	0.375	0.8	0.8	0.833	0.875	0.429	0.667	0.75	1
Slovak Republic	SVK	2017	90	93.0333	70.8	74.5167	100	85.67	0.9	1	0.791	1	0.678167	0.7375	0.75	0.667	0.666667	0.934	1	0.38	1	1	1	1	1	1	0.5	1	1	0.769	0.926	0.717	0.713	0.831	0.791	1	0.714	0.7	0.905	0.7	0.25	0.8	0.8	0.833	0.875	0.5	0.667	0.75	1
Ireland	IRL	2017	100	91.2	75.5563	66.4917	95	85.6496	1	1	0.736	1	0.693667	0.784	1	0.6115	0.666667	0.866	1	0.127	1	0.95	1	1	1	1	1	1	1	0.685	0.896	0.732	0.472	0.896	0.736	1	1	0.8	0.857	0.455	0.25	0.8	0.8	0.75	1	0.571	0.833	0.75	1
Germany	DEU	2017	100	91.0667	70.1562	71.6167	95	85.5679	1	1	0.732	1	0.691	0.726	0.75	0.6115	0.666667	0.934	1	0.264	1	0.95	1	1	1	1	1	1	1	0.872	0.896	0.566	0.448	0.878	0.732	1	0.714	0.8	0.857	0.6	0.375	0.8	0.8	0.75	0.889	0.5	0.667	0.75	1
Turkey	TUR	2017	100	86.1333	87.6063	61.4417	90	85.0362	1	1	0.584	1	0.766667	0.939833	1	0.889	0.666667	0.666	1	0.125	-99	0.9	-99	1	1	1	1	1	1	0.863	0.147	0.448	0.662	0.801	0.584	1	1	0.9	1	0.6	0.5	0.6	1	0.75	0.889	1	1	1	1
Hungary	HUN	2017	100	85.3667	69.05	68.2667	100	84.5367	1	1	0.561	1	0.694	0.6935	0.6945	0.667	0.666667	0.934	1	0.13	1	1	1	1	1	1	1	1	1	0.859	0.812	0.448	0.662	0.024	0.561	1	0.714	0.8	0.9	0.7	0.25	0.8	0.8	0.833	0.778	0.5	0.5	0.75	0.889
Latvia	LVA	2017	100	93	63.1313	65.5667	100	84.3396	1	1	0.79	1	0.663	0.6685	0.389	0.667	0.666667	0.934	1	0.022	1	1	1	1	1	1	1	1	1	0.911	0.952	0.756	0.897	0.434	0.79	1	0.571	0.8	0.857	0.7	0.25	0.8	0.8	0.75	0.778	0.6	0.333	0.75	0.778
Greece	GRC	2017	100	85.1333	69.5438	69.6667	95	83.8688	1	1	0.554	1	0.691	0.709667	0.75	0.6115	0.666667	0.934	1	0.186	1	0.95	1	1	1	1	1	1	1	0.329	0.56	0.328	0.666	0.889	0.554	1	0.714	0.8	0.857	0.6	0.375	0.8	0.8	0.833	0.875	0.5	0.5	0.75	1
New Zealand	NZL	2017	100	91.8333	72.2125	63.7167	90	83.5525	1	1	0.755	1	0.658	0.712	1	0.667	0.666667	0.8	1	0.082	1	0.9	1	1	1	1	1	1	1	0.837	0.907	0.643	0.485	0.902	0.755	1	0.857	0.625	0.905	0.636	0.125	0.8	0.8	0.75	0.889	0.5	0.833	0.5	1
United Kingdom	GBR	2017	100	86.7667	74.55	64.3917	90	83.1417	1	1	0.603	1	0.714833	0.7545	1	0.556	0.666667	0.866	1	0.043	1	0.9	1	1	1	1	1	1	1	0.822	0.384	0.374	0.658	0.775	0.603	1	0.857	0.8	0.857	0.6	0.375	0.8	0.8	0.769	0.875	0.5	0.833	0.75	1
Norway	NOR	2017	100	59.0333	77.9313	76.1167	100	82.6162	1	1	0.771	0	0.757333	0.765167	1	0.667	0.666667	1	1	0.378	1	1	1	1	1	1	1	1	1	0.981	1	0.874	0.5	0.5	0.771	0	1	0.889	0.905	0.7	0.25	0.8	0.8	0.833	0.875	0.5	0.833	0.75	1
Poland	POL	2017	100	60.0667	73.6625	79.1917	100	82.5842	1	1	0.802	0	0.732333	0.759667	0.75	0.667	0.666667	0.934	1	0.567	1	1	1	1	1	1	1	1	1	0.859	0.963	0.704	0.566	0.915	0.802	0	0.714	0.9	0.905	0.7	0.375	0.8	0.8	0.833	0.875	0.8	0.5	0.75	1
Armenia	ARM	2017	100	85.2333	81.0062	60.6417	80	81.3762	1	1	0.557	1	0.801833	0.747167	0.9445	0.889	0.666667	0.6	1	0.159	-99	0.8	-99	1	1	1	1	1	1	0.733	0.788	0.612	0.652	0	0.557	1	1	0.889	0.952	0.545	0.625	0.8	0.933	0.75	0.5	0.5	0.8	1	0.889
Netherlands	NLD	2017	100	66.0333	70.3563	64.6917	100	80.2163	1	1	0.981	0	0.707667	0.733167	0.6945	0.6115	0.666667	0.8	1	0.121	1	1	1	1	1	1	1	1	1	1	1	0.906	1	1	0.981	0	0.714	0.8	0.857	0.7	0.375	0.8	0.8	0.833	0.778	0.571	0.667	0.75	0.889
Estonia	EST	2017	100	58.8667	71.6312	70.4417	100	80.1879	1	1	0.766	0	0.751167	0.723667	0.639	0.667	0.666667	0.866	1	0.285	1	1	1	1	1	1	1	1	1	1	1	0.832	1	0	0.766	0	0.857	0.8	0.9	0.7	0.25	1	0.8	0.75	0.875	0.5	0.667	0.75	0.778
Denmark	DNK	2017	90	65.0667	68.3563	72.1667	100	79.1179	0.9	1	0.952	0	0.694	0.6935	0.6945	0.6115	0.666667	0.866	1	0.354	1	1	1	1	1	1	0.5	1	1	0.963	0.963	0.926	0.944	0.963	0.952	0	0.714	0.8	0.9	0.7	0.25	0.8	0.8	0.833	0.778	0.5	0.5	0.75	0.889
Chile	CHL	2017	100	74.7667	82.125	62.7167	75	78.9217	1	1	0.243	1	0.801833	0.851	1	0.6115	0.666667	0.6	1	0.242	1	0.75	1	1	1	1	1	1	1	0.293	0.497	0.089	0.334	0	0.243	1	1	0.9	0.9	0.636	0.375	1	1	0.75	0.889	0.667	0.8	1	1
Lithuania	LTU	2017	100	56.8	64.0375	72.4167	100	78.6508	1	1	0.704	0	0.687667	0.668	0.389	0.667	0.666667	0.866	1	0.364	1	1	1	1	1	1	1	1	1	0.915	0.933	0.867	0.758	0.048	0.704	0	0.571	0.8	0.905	0.6	0.25	1	0.8	0.75	0.875	0.5	0.333	0.75	0.778
Korea, Rep.	KOR	2017	100	59.3	79.1437	74.0667	80	78.5021	1	1	0.779	0	0.736333	0.837167	1	0.611	0.666667	1	1	0.296	1	0.8	1	1	1	1	1	1	1	0.874	0.926	0.737	0.481	0.874	0.779	0	0.857	0.889	0.952	0.545	0.375	0.8	1	0.667	0.889	0.8	0.667	1	1
Czech Republic	CZE	2017	90	56.8333	75.4813	75.0417	95	78.4712	0.9	1	0.705	0	0.692	0.765167	1	0.667	0.666667	0.934	1	0.401	1	0.95	1	1	1	1	0.5	1	1	0.963	0.963	0.445	0.65	0.505	0.705	0	1	0.7	0.857	0.545	0.25	0.8	0.8	0.833	0.875	0.5	0.833	0.75	1
Costa Rica	CRI	2017	100	86.7667	75.2	62.6167	65	77.9167	1	1	0.603	1	0.756167	0.675	0.9445	0.778	0.666667	0.734	1	0.104	-99	0.65	-99	1	1	1	1	1	1	0.698	0.789	0.297	0.638	0.59	0.603	1	1	0.667	0.95	0.545	0.375	1	0.933	0.75	0.667	0.4	0.8	0.5	0.889
Kyrgyz Republic	KGZ	2017	100	81.2	72.4562	49.4833	85	77.6279	1	1	0.436	1	0.767167	0.609333	0.9445	0.7225	0.333333	0.4	1	0.246	-99	0.85	-99	1	1	1	1	1	1	0.513	0.444	0.292	0.467	0.467	0.436	1	1	0.778	0.905	0.545	0.375	1	0.933	0.5	0.556	0.5	0.667	0.5	0.889
Israel	ISR	2017	100	84.2	61.025	46.4833	95	77.3417	1	1	0.526	1	0.592	0.683333	0.389	0.667	0.333333	0.466	1	0.06	1	0.95	1	1	1	1	1	1	1	0.811	0.763	0.296	0.367	0.391	0.526	1	0.429	0.75	0.762	0.636	0.375	0.6	0.8	0.75	0.667	0.8	0.333	0.75	0.778
Georgia	GEO	2017	100	85.7333	73.6	50.2333	75	76.9133	1	1	0.572	1	0.742167	0.627833	0.9445	0.8335	0.333333	0.532	1	0.144	-99	0.75	-99	1	1	1	1	1	1	0.781	0.805	0.686	0.586	0	0.572	1	1	0.667	0.9	0.636	0.25	1	0.933	0.5	0.667	0.5	0.667	0.5	0.889
Bulgaria	BGR	2017	100	60.9333	63.5312	74.2917	85	76.7512	1	1	0.828	0	0.6195	0.593	0.8335	0.6115	0.666667	0.934	1	0.371	-99	0.85	-99	1	1	1	1	1	1	0.93	0.963	0.801	0.963	0.481	0.828	0	0.857	0.8	0.81	0.4	0.25	0.6	0.6	0.583	0.625	0.333	0.667	0.75	0.667
Japan	JPN	2017	90	52.4333	76.025	75.125	90	76.7167	0.9	1	0.573	0	0.6995	0.772167	1	0.667	1	0.666	1	0.339	1	0.9	1	1	1	1	0.5	1	1	0.952	0.264	0.174	0.5	0.976	0.573	0	1	0.667	0.9	0.455	0.375	0.8	0.8	0.75	1	0.5	0.833	0.75	1
Mauritius	MUS	2017	100	87.2333	64.9875	64.325	65	76.3092	1	1	0.617	1	0.596833	0.663833	0.6945	0.7225	1	0.534	1	0.039	-99	0.65	-99	1	1	1	1	1	1	0.815	0.712	0.458	0.637	0.463	0.617	1	0.571	0.667	0.857	0.636	0.25	0.6	0.8	0.583	0.75	0.6	0.5	0.75	0.889
South Africa	ZAF	2017	83.4	83.7667	79.3688	68.1417	65	75.9354	0.834	1	0.513	1	0.793333	0.7305	0.9445	0.8335	0.666667	0.8	1	0.259	-99	0.65	-99	0.5	1	0.67	1	1	1	0.408	0.69	0.345	0.43	0.69	0.513	1	1	0.9	0.905	0.455	0.5	1	0.8	0.583	0.75	0.5	1	0.75	0.889
Thailand	THA	2017	100	76.1333	77.0687	56.35	70	75.9104	1	1	0.284	1	0.771667	0.672333	0.9445	0.889	1	0.732	0.5	0.022	-99	0.7	-99	1	1	1	1	1	1	0	0.933	0.019	0.467	0	0.284	1	0.857	1	0.857	0.545	0.571	0.8	0.8	0.667	0.667	0.4	1	0.5	0.889
Belgium	BEL	2017	100	51.1	65.1688	66.6167	95	75.5771	1	1	0.533	0	0.699333	0.668	0.5	0.6115	0.666667	0.8	1	0.198	1	0.95	1	1	1	1	1	1	1	0.563	0.674	0.526	0.374	0.526	0.533	0	0.571	0.8	0.85	0.8	0.375	0.8	0.8	0.75	0.875	0.5	0.333	0.75	1
Philippines	PHL	2017	100	90.0667	72.2188	80.175	30	74.4921	1	1	0.702	1	0.7665	0.65	0.6945	0.8335	1	1	1	0.207	-99	0.3	-99	1	1	1	1	1	1	0.944	0.963	0.542	0.579	0.481	0.702	1	0.714	0.9	0.905	0.455	0.625	1	0.8	0.5	0.75	0.75	0.6	0.5	0.889
Egypt, Arab Rep.	EGY	2017	100	77.3667	77.9437	56.75	60	74.4121	1	1	0.321	1	0.8045	0.708333	0.9445	0.7525	0.5	0.6	1	0.17	-99	0.6	-99	1	1	1	1	1	1	0	0.963	0.159	0.481	0	0.321	1	1	0.889	0.952	0.636	0.75	0.6	0.933	0.75	0.667	0.6	0.8	0.5	0.889
Mongolia	MNG	2017	100	73.7	75.1188	65.0417	55	73.7721	1	0.5	0.711	1	0.800333	0.628667	0.9445	0.778	0.666667	0.6	1	0.335	-99	0.55	-99	1	1	1	1	1	0.5	0.976	1	0.887	0.689	0	0.711	1	1	0.9	0.857	0.545	0.5	1	0.8	0.583	0.556	0.333	1	0.5	0.889
Serbia	SRB	2017	100	62.9	74.1188	56.6667	75	73.7371	1	0.5	0.387	1	0.804667	0.602833	0.9445	0.7625	0.666667	0.6	1	0	-99	0.75	-99	1	1	1	1	1	0.5	0.449	0.706	0.381	0.401	0	0.387	1	1	0.8	0.857	0.6	0.571	1	0.6	0.583	0.667	0.6	0.667	0.5	0.889
Russian Federation	RUS	2017	93.4	81.0333	54.3312	58.9	80	73.5329	0.934	1	0.431	1	0.527333	0.523167	0.5835	0.6115	0.5	0.668	1	0.188	-99	0.8	-99	1	1	0.67	1	1	1	0.306	0.643	0.259	0.448	0.5	0.431	1	0.571	0.556	0.762	0.3	0.375	0.6	0.6	0.583	0.556	0.4	0.5	0.5	0.667
Malta	MLT	2017	100	82.1333	46.5312	68.4667	70	73.4262	1	1	0.464	1	0.4995	0.482	0.278	0.5	0.666667	0.934	1	0.138	-99	0.7	-99	1	1	1	1	1	1	0.209	0.623	0.317	0.501	0.671	0.464	1	0.429	0.556	0.762	0.4	0.25	0.6	0.6	0.5	0.625	0.5	0.167	0.5	0.556
Sri Lanka	LKA	2017	100	80.5333	70.8187	65.9	45	72.4504	1	1	0.416	1	0.716833	0.616	0.9445	0.7225	1	0.532	1	0.104	-99	0.45	-99	1	1	1	1	1	1	0.264	0.91	0.401	0.504	0	0.416	1	0.857	1	0.905	0.364	0.375	0.8	0.8	0.462	0.667	0.6	0.667	0.5	0.889
Kazakhstan	KAZ	2017	100	47.6333	79.8875	63.05	70	72.1142	1	1	0.429	0	0.794167	0.725	0.9445	0.889	0.5	0.6	1	0.422	-99	0.7	-99	1	1	1	1	1	1	0.792	0.274	0.577	0.5	0	0.429	0	1	0.667	0.905	0.818	0.375	1	0.933	0.583	0.667	0.75	0.667	0.75	0.889
Brazil	BRA	2017	90	79.4667	76.175	59.775	55	72.0833	0.9	1	0.384	1	0.751667	0.788833	0.6945	0.778	0.5	0.6	1	0.291	-99	0.55	-99	1	1	1	1	0.5	1	0.743	0.388	0.487	0.302	0	0.384	1	0.857	0.778	0.9	0.6	0.375	1	0.933	0.833	0.667	0.5	0.8	1	0.889
Iceland	ISL	2017	80	55.9	60.4813	62.2167	100	71.7196	0.8	1	0.677	0	0.590333	0.6335	0.5	0.667	0.666667	0.8	1	0.022	1	1	1	1	0	1	1	1	1	0.952	0.952	0.877	0.604	0	0.677	0	0.571	0.7	0.857	0.364	0.25	0.8	0.8	0.667	1	0.667	0.167	0.5	1
Colombia	COL	2017	100	84.3	82.9375	41.025	50	71.6525	1	1	0.529	1	0.82	0.7805	0.9445	0.889	0.5	0.934	0	0.207	-99	0.5	-99	1	1	1	1	1	1	0.874	0.236	0.35	0.703	0.481	0.529	1	1	0.875	1	0.545	0.5	1	0.933	0.75	0.75	0.5	1	0.75	0.889
Cyprus	CYP	2017	100	52.1667	54.4125	71.6583	80	71.6475	1	1	0.565	0	0.5305	0.559333	0.5835	0.5	0.833333	0.934	1	0.099	-99	0.8	-99	1	1	1	1	1	1	0.798	0.242	0.448	0.485	0.849	0.565	0	0.571	0.6	0.762	0.4	0.25	0.6	0.8	0.5	0.556	0.5	0.5	0.5	0.667
Ecuador	ECU	2017	100	87.3	77.8438	42.5417	50	71.5371	1	1	0.619	1	0.7935	0.716667	0.9445	0.7525	0.666667	0.8	0	0.235	-99	0.5	-99	1	1	1	1	1	1	0.769	0.764	0.312	0.646	0.606	0.619	1	1	0.889	0.95	0.636	0.286	1	0.933	0.667	0.75	0.4	0.8	0.75	0.889
Luxembourg	LUX	2017	80	53.1	62.55	59.2917	100	70.9883	0.8	1	0.593	0	0.633833	0.682167	0.4445	0.6115	0.666667	0.666	1	0.039	1	1	1	1	0	1	1	1	1	0.642	0.66	0.542	0.481	0.642	0.593	0	0.571	0.7	0.857	0.5	0.375	0.8	0.8	0.75	0.889	0.571	0.333	0.75	0.889
Romania	ROU	2017	90	78.6333	57.125	66.5167	60	70.455	0.9	1	0.359	1	0.570833	0.554167	0.5835	0.6115	0.666667	0.934	1	0.06	-99	0.6	-99	1	1	1	0.5	1	1	0.261	0.722	0.232	0.42	0.16	0.359	1	0.857	0.556	0.762	0.4	0.25	0.6	0.6	0.5	0.625	0.6	0.5	0.5	0.667
Indonesia	IDN	2017	100	86.2667	68.9125	47.0917	50	70.4542	1	1	0.588	1	0.72	0.663833	0.6945	0.667	0.666667	0.8	0	0.417	-99	0.5	-99	1	1	1	1	1	1	0.575	0.981	0.269	0.537	0.575	0.588	1	0.857	0.889	0.8	0.545	0.429	0.8	0.933	0.583	0.667	0.5	0.8	0.5	0.889
Moldova	MDA	2017	100	60.0667	54.7812	56.3417	75	69.2379	1	1	0.802	0	0.6245	0.447333	0.4445	0.7225	0.666667	0.466	1	0.121	-99	0.75	-99	1	1	1	1	1	1	1	0.929	0.862	0.721	0.5	0.802	0	0.571	0.625	0.81	0.455	0.286	1	0.6	0.417	0.75	0.5	0.167	0.25	0.889
Uganda	UGA	2017	100	65.1333	78.25	42.2	60	69.1167	1	0.5	0.454	1	0.791167	0.684333	0.9445	0.889	1	0.666	0	0.022	-99	0.6	-99	1	1	1	1	1	0.5	0.19	0.867	0.363	0.777	0.071	0.454	1	1	0.875	0.667	0.455	0.75	1	0.8	0.5	0.556	0.75	1	0.5	0.889
Uruguay	URY	2017	100	83.6333	69.0625	67.325	25	69.0042	1	1	0.509	1	0.720167	0.584333	0.889	0.7225	1	0.6	1	0.093	-99	0.25	-99	1	1	1	1	1	1	0.856	0.348	0.359	0.5	0.481	0.509	1	0.857	0.6	0.762	0.727	0.625	0.75	0.8	0.583	0.556	0.4	0.667	0.5	0.778
Ukraine	UKR	2017	100	45.7667	67.2062	53.2917	75	68.2529	1	1	0.373	0	0.664167	0.572333	0.9445	0.7225	0.166667	0.734	1	0.231	-99	0.75	-99	1	1	1	1	1	1	0.285	0.878	0.24	0.463	0	0.373	0	1	0.7	0.762	0.273	0.25	1	0.6	0.5	0.667	0.5	0.667	0.5	0.889
Albania	ALB	2017	100	35.9	67.375	55.0167	80	67.6583	1	0.5	0.577	0	0.6865	0.637833	0.6945	0.7225	0.666667	0.534	1	0	-99	0.8	-99	1	1	1	1	1	0.5	0.786	0.905	0.671	0.5	0.024	0.577	0	0.571	0.9	0.762	0.636	0.25	1	0.8	0.583	0.444	0.75	0.5	0.75	0.889
Peru	PER	2017	90	86.5	77.675	53.1	30	67.455	0.9	1	0.595	1	0.786	0.692667	0.9445	0.8335	1	0.934	0	0.19	-99	0.3	-99	1	1	1	1	0.5	1	0.878	0.778	0.632	0.522	0.167	0.595	1	1	0.8	0.905	0.636	0.375	1	0.8	0.75	0.556	0.5	0.8	0.75	0.889
Rwanda	RWA	2017	100	71.0667	70.175	45.7667	50	67.4017	1	0.5	0.632	1	0.761167	0.664833	0.6945	0.6415	0.666667	1	0	0.164	-99	0.5	-99	1	1	1	1	1	0.5	0.508	0.915	0.262	0.542	0.933	0.632	1	0.857	0.778	0.762	0.545	0.625	1	0.8	0.583	0.556	0.75	0.8	0.5	0.889
El Salvador	SLV	2017	90	78.7	75.8125	51.0917	40	67.1208	0.9	1	0.361	1	0.807667	0.686167	0.6945	0.889	0.666667	0.334	1	0.043	-99	0.4	-99	1	1	1	1	0.5	1	0.415	0.696	0.32	0.374	0	0.361	1	0.857	0.778	0.95	0.636	0.625	1	0.933	0.667	0.667	0.5	0.6	0.75	0.889
Belarus	BLR	2017	90	46.5333	65.5	50.0833	75	65.4233	0.9	1	0.396	0	0.678	0.614833	0.639	0.7225	0.333333	0.4	1	0.27	-99	0.75	-99	1	1	1	1	0.5	1	0.344	0.814	0.296	0.524	0	0.396	0	0.714	0.667	0.857	0.455	0.375	1	0.8	0.583	0.556	0.5	0.5	0.75	0.778
Singapore	SGP	2017	100	56.8667	41.0375	53.3333	75	65.2475	1	1	0.706	0	0.4145	0.4205	0.278	0.5	0.333333	0.8	1	0	1	0.75	1	1	1	1	1	1	1	0.867	0.867	0.843	0.518	0.433	0.706	0	0	0.375	0.762	0.5	0.25	0.6	0.8	0.333	0.556	0.167	0.167	0.5	0.556
Argentina	ARG	2017	70	78.9	78.9625	62.5667	35	65.0858	0.7	1	0.367	1	0.7435	0.802833	0.9445	0.7335	0.666667	0.732	1	0.104	-99	0.35	-99	0	1	1	0.5	1	1	0.793	0.159	0.349	0.49	0.042	0.367	1	1	0.7	0.95	0.636	0.375	0.8	1	0.75	0.667	0.4	1	1	0.889
North Macedonia	MKD	2017	100	53.9	52.3062	58.975	60	65.0362	1	1	0.617	0	0.619833	0.409667	0.4445	0.6515	0.5	0.734	1	0.125	-99	0.6	-99	1	1	1	1	1	1	0.944	0.963	0.694	0.481	0	0.617	0	0.571	0.556	0.762	0.455	0.375	1	0.6	0.385	0.556	0.5	0.167	0.25	0.889
Tanzania	TZA	2017	90	60.2	75.4437	43.4417	55	64.8171	0.9	0.5	0.306	1	0.756333	0.681333	0.9445	0.778	0.666667	0.868	0	0.203	-99	0.55	-99	0.5	1	1	1	1	0.5	0.105	0.738	0.343	0.343	0	0.306	1	0.857	0.9	0.667	0.364	0.75	1	0.8	0.538	0.75	0.5	1	0.5	0.889
Malaysia	MYS	2017	86.6	49.7667	74.5625	67.55	45	64.6958	0.866	1	0.493	0	0.743667	0.689	0.9445	0.7225	1	0.532	1	0.17	-99	0.45	-99	1	1	0.33	1	1	1	0.822	0.775	0.422	0.411	0.037	0.493	0	1	0.9	0.857	0.455	0.25	1	0.8	0.667	0.75	0.75	0.667	0.5	0.889
India	IND	2017	60	86.3	60.2125	66.8	50	64.6625	0.6	1	0.589	1	0.629667	0.5315	0.4445	0.889	1	0.8	0.5	0.372	-99	0.5	-99	0	1	1	1	0	1	0.981	0.657	0.321	0.529	0.458	0.589	1	0.286	0.9	0.762	0.455	0.375	1	0.933	0.25	0.556	0.5	0.2	0.75	0.889
Vietnam	VNM	2017	100	63.7333	57.225	66.3167	35	64.455	1	0.5	0.412	1	0.650833	0.525	0.4445	0.606	0.666667	0.8	1	0.186	-99	0.35	-99	1	1	1	1	1	0.5	0.52	0.671	0.49	0.378	0	0.412	1	0.571	0.9	0.714	0.545	0.375	0.8	0.8	0.583	0.667	0.4	0.2	0.5	0.889
Dominican Republic	DOM	2017	100	65.5333	65.7	25.8083	60	63.4083	1	0.5	0.466	1	0.750167	0.538833	0.4445	0.9445	0.333333	0.6	0	0.099	-99	0.6	-99	1	1	1	1	1	0.5	0.774	0.726	0.33	0.481	0.019	0.466	1	0.571	0.778	1	0.727	0.625	0.8	0.933	0.667	0.333	0.6	0.2	0.5	0.889
Guatemala	GTM	2017	90	60.6667	79.15	56.8	25	62.3233	0.9	0.5	0.32	1	0.821667	0.677833	0.9445	0.889	0.5	0.668	1	0.104	-99	0.25	-99	0.5	1	1	1	1	0.5	0.505	0.495	0.213	0.387	0	0.32	1	1	0.778	0.857	0.545	0.75	1	0.933	0.667	0.667	0.5	0.8	0.5	0.889
Croatia	HRV	2017	60	47.7333	58.5	63.8667	75	61.02	0.6	1	0.432	0	0.592833	0.5875	0.5835	0.5555	0.666667	0.866	1	0.022	-99	0.75	-99	1	1	0	0	1	1	0.169	0.859	0.273	0.43	0.43	0.432	0	0.857	0.6	0.85	0.4	0.25	0.6	0.8	0.5	0.625	0.6	0.5	0.5	0.667
West Bank and Gaza	PSE	2017	80	46.9	60.175	62.1167	55	60.8383	0.8	1	0.407	0	0.618	0.473167	0.9445	0.596	0.666667	0.934	0.5	0.384	-99	0.55	-99	1	0	1	1	1	1	0.156	0.929	0.439	0.513	0	0.407	0	0.857	0.75	0.381	0.545	0.375	0.8	0.6	0.462	0.444	0.333	0.5	0.5	0.889
Bolivia	BOL	2017	100	66.8333	71.9625	49.9667	15	60.7525	1	0.5	0.505	1	0.773833	0.662833	0.6945	0.7525	0.666667	0.668	0.5	0.164	-99	0.15	-99	1	1	1	1	1	0.5	0.671	0.751	0.69	0.411	0	0.505	1	0.857	0.9	0.95	0.636	0.5	0.8	0.933	0.75	0.444	0.5	0.6	0.75	0.889
Honduras	HND	2017	90	61.6	68.6813	42.4333	40	60.5429	0.9	0.5	0.348	1	0.657333	0.683333	0.6945	0.778	0.333333	0.734	0.5	0.13	-99	0.4	-99	1	1	1	1	0.5	0.5	0.66	0.358	0.253	0.467	0	0.348	1	0.714	0.444	0.9	0.636	0.25	1	0.933	0.75	0.667	0.4	0.6	0.75	0.889
Azerbaijan	AZE	2017	80	31.1333	64.85	55.2417	70	60.245	0.8	0.5	0.434	0	0.676833	0.561667	0.6945	0.778	0.666667	0.334	1	0.209	-99	0.7	-99	0	1	1	1	1	0.5	0.934	0.393	0.49	0.352	0	0.434	0	0.429	0.889	0.857	0.6	0.286	1	0.8	0.462	0.625	0.4	0.333	0.75	0.889
Ghana	GHA	2017	100	60.6667	67.6437	32.525	40	60.1671	1	0.5	0.32	1	0.729	0.6295	0.6945	0.6415	0.5	0.534	0	0.267	-99	0.4	-99	1	1	1	1	1	0.5	0.071	0.867	0.202	0.461	0	0.32	1	0.857	0.667	0.714	0.636	0.5	1	0.933	0.5	0.444	0.6	0.8	0.5	0.889
Montenegro	MNE	2017	90	61.8667	61.4438	56.4667	30	59.9554	0.9	0.5	0.356	1	0.638	0.533333	0.6945	0.707	0.666667	0.532	1	0.06	-99	0.3	-99	1	1	1	0.5	1	0.5	0.634	0.326	0.217	0.6	0	0.356	1	0.857	0.9	0.857	0.364	0.25	0.6	0.6	0.583	0.667	0.6	0.5	0.25	0.889
Tunisia	TUN	2017	90	78.9	60.2313	48.3083	20	59.4879	0.9	1	0.367	1	0.61	0.5695	0.6945	0.5855	0.333333	0.534	1	0.065	-99	0.2	-99	0.5	1	1	1	1	1	0.498	0.73	0.232	0.374	0	0.367	1	0.857	0.6	0.714	0.364	0.125	1	0.8	0.25	0.667	0.6	0.6	0.5	0.889
Bangladesh	BGD	2017	90	61.9	70.4688	48.9417	25	59.2621	0.9	0.5	0.357	1	0.749667	0.665667	0.6945	0.697	0.666667	0.666	0.5	0.125	-99	0.25	-99	0.5	1	1	1	1	0.5	0.037	0.896	0.406	0.448	0	0.357	1	0.714	0.889	0.85	0.545	0.5	1	0.933	0.667	0.444	0.6	0.6	0.75	0.889
Fiji	FJI	2017	80	60.2	59.225	50.5667	45	58.9983	0.8	0.5	0.306	1	0.593167	0.513833	0.6945	0.7225	0.666667	0.334	1	0.022	-99	0.45	-99	0.5	1	1	0.5	1	0.5	0.19	0.644	0.363	0.334	0	0.306	1	0.857	0.444	0.81	0.273	0.375	0.8	0.933	0.417	0.333	0.4	0.5	0.5	0.889
Zambia	ZMB	2017	90	56.7333	71.9938	35.1583	40	58.7771	0.9	0.5	0.202	1	0.7495	0.651833	0.9445	0.611	0.333333	0.734	0	0.339	-99	0.4	-99	0.5	1	1	1	1	0.5	0	0.583	0.135	0.292	0	0.202	1	1	0.875	0.667	0.455	0.5	1	0.8	0.417	0.444	0.75	1	0.5	0.889
United Arab Emirates	ARE	2017	100	38.2667	40.625	49.4917	65	58.6767	1	0.5	0.648	0	0.417667	0.425	0.222	0.5	0.666667	0.132	1	0.181	-99	0.65	-99	1	1	1	1	1	0.5	0.737	0.774	0.599	0.396	0.732	0.648	0	0.286	0.444	0.762	0.364	0.25	0.4	0.8	0.25	0.5	0.333	0.167	0.5	0.444
Senegal	SEN	2017	80	64.0333	67.4125	40.4667	40	58.3825	0.8	0.5	0.421	1	0.7115	0.591667	0.6945	0.789	0.666667	0.734	0	0.218	-99	0.4	-99	0	1	1	1	1	0.5	0.071	0.886	0.268	0.485	0.395	0.421	1	0.571	0.8	0.762	0.636	0.75	0.75	0.8	0.583	0.667	0.4	0.6	0.5	0.889
Pakistan	PAK	2017	100	59.2	67.225	35.2	30	58.325	1	0.5	0.276	1	0.702167	0.663833	0.6945	0.5855	0.5	0.6	0	0.308	-99	0.3	-99	1	1	1	1	1	0.5	0	0.756	0.245	0.378	0	0.276	1	0.857	0.889	0.762	0.455	0.25	1	0.8	0.583	0.75	0.75	0.6	0.5	0.889
Samoa	WSM	2017	90	63.2667	59.8438	33.1167	45	58.2454	0.9	0.5	0.398	1	0.5645	0.494333	0.9445	0.6665	0.666667	0.466	0	0.192	-99	0.45	-99	0.5	1	1	1	1	0.5	0.137	0.896	0.24	0.43	0.289	0.398	1	0.714	0.667	0.667	0.364	0.375	0.6	0.8	0.333	0.333	0.5	0.5	0.5	0.889
Jordan	JOR	2017	80	79.7	60.5688	50.5917	20	58.1721	0.8	1	0.391	1	0.565	0.559333	0.6945	0.778	0.666667	0.6	0.5	0.257	-99	0.2	-99	0	1	1	1	1	1	0.514	0.753	0.487	0.203	0	0.391	1	0.429	0.667	0.714	0.455	0.125	1	0.8	0.5	0.556	0.4	0.6	0.5	0.889
Togo	TGO	2017	90	59.0333	73.275	31.5917	35	57.78	0.9	0.5	0.271	1	0.760167	0.638167	0.9445	0.7225	0.666667	0.466	0	0.131	-99	0.35	-99	0.5	1	1	1	1	0.5	0.235	0.583	0.277	0.258	0	0.271	1	1	0.889	0.667	0.455	0.75	0.8	0.8	0.462	0.667	0.6	0.8	0.5	0.889
Cambodia	KHM	2017	70	59.5667	67.7812	50.35	40	57.5396	0.7	0.5	0.287	1	0.688833	0.627833	0.6945	0.778	1	0.734	0	0.28	-99	0.4	-99	0	1	1	1	0.5	0.5	0.207	0.572	0.188	0.469	0	0.287	1	0.571	0.667	0.85	0.545	0.5	1	0.933	0.417	0.667	0.4	0.6	0.75	0.889
Kenya	KEN	2017	80	60.7667	69.3812	36.4917	40	57.3279	0.8	0.5	0.323	1	0.7585	0.563833	0.6945	0.889	0.666667	0.534	0	0.259	-99	0.4	-99	0.5	1	1	1	0.5	0.5	0.094	0.886	0.15	0.485	0	0.323	1	0.857	0.9	0.714	0.455	0.625	1	0.933	0.417	0.333	0.4	0.8	0.5	0.889
Paraguay	PRY	2017	70	60.3667	70.6375	44.4	40	57.0808	0.7	0.5	0.311	1	0.764167	0.591667	0.6945	0.889	1	0.668	0	0.108	-99	0.4	-99	1	0	1	1	0.5	0.5	0.074	0.896	0.119	0.467	0	0.311	1	0.857	0.778	0.905	0.545	0.5	1	0.8	0.583	0.667	0.5	0.5	0.5	0.889
Cameroon	CMR	2017	80	61.7	75.25	33.25	35	57.04	0.8	0.5	0.351	1	0.748333	0.665667	0.9445	0.8335	0.5	0.534	0	0.296	-99	0.35	-99	0.5	1	1	1	0.5	0.5	0.225	0.843	0.296	0.391	0	0.351	1	1	0.667	0.762	0.636	0.625	0.8	0.933	0.667	0.444	0.4	0.8	0.75	0.889
Morocco	MAR	2017	70	74.9667	62.8062	27.275	50	57.0096	0.7	1	0.249	1	0.671167	0.512833	0.6945	0.778	0.5	0.466	0	0.125	-99	0.5	-99	0.5	0	1	1	1	1	0.056	0.703	0.079	0.41	0	0.249	1	0.714	0.778	0.81	0.6	0.125	1	0.8	0.333	0.444	0.4	0.6	0.5	0.889
Botswana	BWA	2017	60	66.2333	69.275	53.8167	35	56.865	0.6	0.5	0.487	1	0.626	0.684333	0.9445	0.6665	0.666667	0.4	1	0.086	-99	0.35	-99	0.5	0	1	1	0.5	0.5	0.037	0.83	0.325	0.452	0.793	0.487	1	0.714	0.7	0.762	0.455	0.125	1	0.8	0.417	0.556	0.75	0.833	0.75	0.889
Oman	OMN	2017	100	37.9667	44.0875	61.05	40	56.6208	1	0.5	0.639	0	0.531167	0.3835	0.3335	0.4495	1	0.334	1	0.108	-99	0.4	-99	1	1	1	1	1	0.5	0.668	0.752	0.668	0.437	0.668	0.639	0	0	0.7	0.857	0.455	0.375	0.8	0.8	0.167	0.5	0.167	0.167	0.5	0.667
Niger	NER	2017	90	60.8667	63.9562	36.45	30	56.2546	0.9	0.5	0.326	1	0.660333	0.5165	0.9445	0.6415	0.5	0.668	0	0.29	-99	0.3	-99	0.5	1	1	1	1	0.5	0.179	0.819	0.24	0.391	0	0.326	1	1	0.778	0.714	0.545	0.125	0.8	0.8	0.333	0.333	0.333	0.8	0.5	0.889
Malawi	MWI	2017	90	61.9667	72.3	34.675	20	55.7883	0.9	0.5	0.359	1	0.730667	0.586167	0.9445	0.889	0.5	0.734	0	0.153	-99	0.2	-99	0.5	1	1	1	1	0.5	0.222	0.647	0.259	0.306	0.359	0.359	1	1	0.9	0.714	0.545	0.625	0.6	0.933	0.462	0.222	0.6	0.8	0.5	0.889
Cote d'Ivoire	CIV	2017	90	59.1333	70.85	33.3667	25	55.67	0.9	0.5	0.274	1	0.770667	0.609333	0.6945	0.8335	0.666667	0.668	0	0	-99	0.25	-99	0.5	1	1	1	1	0.5	0.142	0.612	0.287	0.33	0	0.274	1	0.857	0.778	0.762	0.727	0.5	1	0.933	0.667	0.556	0.4	0.6	0.5	0.889
Ethiopia	ETH	2017	90	58.6667	76.3187	37.7083	15	55.5388	0.9	0.5	0.26	1	0.832	0.6475	0.9445	0.7225	0.333333	0.934	0	0.241	-99	0.15	-99	0.5	1	1	1	1	0.5	0	0.689	0.245	0.368	0	0.26	1	1	0.9	0.762	0.455	0.875	1	0.933	0.385	0.667	0.6	0.8	0.5	0.889
Mozambique	MOZ	2017	80	57.3667	69.4875	35.1	35	55.3908	0.8	0.5	0.221	1	0.696333	0.597333	0.9445	0.7335	1	0.268	0	0.136	-99	0.35	-99	0.5	1	1	1	0.5	0.5	0.132	0.617	0.042	0.315	0	0.221	1	1	0.8	0.714	0.364	0.5	0.8	0.8	0.417	0.667	0.4	0.8	0.5	0.889
Kuwait	KWT	2017	100	33.5	49.625	63.125	30	55.25	1	0.5	0.505	0	0.493	0.5045	0.528	0.4495	0.5	0.8	1	0.225	-99	0.3	-99	1	1	1	1	1	0.5	0.806	0.896	0.396	0.425	0	0.505	0	0.286	0.667	0.8	0.455	0.25	0.5	1	0.25	0.444	0.333	0.5	0.5	0.556
Cabo Verde	CPV	2017	80	57.0333	60.7437	53.4417	25	55.2437	0.8	0.5	0.211	1	0.595833	0.588833	0.6945	0.611	0.666667	0.4	1	0.071	-99	0.25	-99	0	1	1	1	1	0.5	0.275	0.27	0.212	0.296	0	0.211	1	0.857	0.556	0.857	0.455	0.25	0.6	0.8	0.5	0.333	0.4	0.5	1	0.889
Bosnia and Herzegovina	BIH	2017	80	27.7333	56.5938	46.6833	65	55.2021	0.8	0.5	0.332	0	0.560833	0.559333	0.4445	0.7225	0.333333	0.534	1	0	-99	0.65	-99	0	1	1	1	1	0.5	0.033	0.824	0.373	0.429	0	0.332	0	0.429	0.556	0.857	0.273	0.25	1	0.8	0.583	0.556	0.5	0.167	0.75	0.889
China	CHN	2017	83.4	46.5333	59.9875	35.9167	50	55.1675	0.834	1	0.396	0	0.6255	0.576	0.6945	0.5	0.666667	0.4	0	0.37	-99	0.5	-99	1	1	0.67	1	0.5	1	0.024	0.804	0.733	0.421	0	0.396	0	0.714	0.8	0.75	0.364	0.125	1	0.8	0.25	0.556	0.6	0.5	0.75	0.889
Tajikistan	TJK	2017	90	31.8667	61.4625	41.4167	50	54.9492	0.9	0.5	0.456	0	0.6775	0.479167	0.6945	0.7525	0.666667	0.468	0.5	0.022	-99	0.5	-99	0.5	1	1	1	1	0.5	0.463	0.489	0.443	0.443	0.443	0.456	0	0.857	0.625	0.81	0.273	0.5	1	0.8	0.231	0.444	0.4	0.5	0.5	0.889
Nepal	NPL	2017	80	60.7333	71.2	42.625	20	54.9117	0.8	0.5	0.322	1	0.732	0.574	0.9445	0.8335	1	0.666	0	0.039	-99	0.2	-99	0	1	1	1	1	0.5	0.024	0.806	0.306	0.476	0	0.322	1	0.571	0.889	0.762	0.545	0.625	1	0.8	0.5	0.444	0.4	0.8	0.5	0.889
Lesotho	LSO	2017	80	63.2	52.1938	36.4917	40	54.3771	0.8	0.5	0.396	1	0.536333	0.4665	0.4445	0.7225	0.666667	0.668	0	0.125	-99	0.4	-99	0	1	1	1	1	0.5	0.204	0.734	0.406	0.635	0	0.396	1	0.429	0.667	0.667	0.455	0.25	0.75	0.933	0.333	0.333	0.5	0.2	0.5	0.889
Burundi	BDI	2017	80	59.7333	74.7188	21.3583	35	54.1621	0.8	0.5	0.292	1	0.788333	0.62	0.9445	0.808	0.333333	0.4	0	0.121	-99	0.35	-99	0.5	1	1	1	0.5	0.5	0	0.764	0.311	0.387	0	0.292	1	1	0.778	0.8	0.727	0.625	0.8	0.933	0.615	0.222	0.4	0.8	0.75	0.889
Myanmar	MMR	2017	86.6	32.0333	73.9125	40.2167	35	53.5525	0.866	0.5	0.461	0	0.746833	0.627833	0.9445	0.8445	0.666667	0.668	0	0.274	-99	0.35	-99	1	1	0.33	1	1	0.5	0.52	0.745	0.557	0.424	0.061	0.461	0	1	0.889	0.762	0.455	0.625	0.75	0.8	0.667	0.667	0.333	0.8	0.5	0.889
Panama	PAN	2017	80	28.7667	69.4062	59.9167	25	52.6179	0.8	0.5	0.363	0	0.7275	0.652833	0.6945	0.717	0.666667	0.466	1	0.264	-99	0.25	-99	1	0	1	1	1	0.5	0.495	0.745	0.131	0.443	0	0.363	0	0.857	0.667	0.905	0.636	0.5	0.8	0.8	0.75	0.667	0.4	0.8	0.5	0.889
Namibia	NAM	2017	70	59	71.3375	32.6917	30	52.6058	0.7	0.5	0.27	1	0.674333	0.672333	0.9445	0.7225	0.666667	0.4	0	0.241	-99	0.3	-99	0.5	1	0	1	1	0.5	0.167	0.623	0.155	0.406	0	0.27	1	0.714	0.9	0.762	0.545	0.625	0.5	0.8	0.417	0.667	0.6	0.8	0.75	0.889
Mali	MLI	2017	80	62.6333	58.9312	35.2833	25	52.3696	0.8	0.5	0.379	1	0.613333	0.5545	0.639	0.572	0.333333	0.866	0	0.212	-99	0.25	-99	0	1	1	1	1	0.5	0.33	0.667	0.39	0.343	0.167	0.379	1	0.571	0.8	0.714	0.545	0.25	0.8	0.8	0.583	0.444	0.4	0.6	0.5	0.778
Bhutan	BTN	2017	80	61.1	67.975	32.7	20	52.355	0.8	0.5	0.333	1	0.675667	0.6	0.9445	0.6665	0.5	0.534	0	0.274	-99	0.2	-99	1	0	1	1	1	0.5	0.15	0.878	0.122	0.514	0	0.333	1	0.857	0.667	0.7	0.455	0.375	1	0.933	0.417	0.333	0.5	0.667	0.75	0.889
Qatar	QAT	2017	100	28.5667	47.775	59.6917	25	52.2067	1	0.5	0.357	0	0.4395	0.49	0.528	0.5055	0.666667	0.6	1	0.121	-99	0.25	-99	1	1	1	1	1	0.5	0.311	0.849	0.188	0.439	0	0.357	0	0.286	0.25	0.762	0.364	0.375	0.6	0.8	0.25	0.556	0.167	0.667	0.5	0.556
Belize	BLZ	2017	80	28.4333	56.9562	63.1167	30	51.7013	0.8	0.5	0.353	0	0.5615	0.549833	0.4445	0.778	0.666667	0.666	1	0.192	-99	0.3	-99	0	1	1	1	1	0.5	0.304	0.745	0.269	0.448	0	0.353	0	0.286	0.667	0.905	0.636	0.375	0.5	0.933	0.75	0.333	0.333	0.2	0.75	0.889
Burkina Faso	BFA	2017	70	59.4333	67.4875	25.1583	35	51.4158	0.7	0.5	0.283	1	0.668333	0.612833	0.9445	0.611	0.333333	0.466	0	0.207	-99	0.35	-99	0	1	1	1	0.5	0.5	0	0.734	0.277	0.404	0	0.283	1	1	0.778	0.762	0.545	0.125	0.8	0.933	0.417	0.444	0.333	0.8	0.75	0.889
Saudi Arabia	SAU	2017	80	26.1667	46.575	71.725	30	50.8933	0.8	0.5	0.285	0	0.375333	0.533333	0.5835	0.4165	1	0.666	1	0.203	-99	0.3	-99	1	0	1	1	1	0.5	0.416	0.453	0.245	0.312	0	0.285	0	0.143	0.333	0.762	0.364	0.25	0.4	0.8	0.333	0.5	0.4	0.667	0.5	0.667
Zimbabwe	ZWE	2017	90	25.4	60.9125	40.3667	35	50.3358	0.9	0.5	0.262	0	0.577667	0.635167	0.6945	0.54	0.666667	0.734	0	0.214	-99	0.35	-99	0.5	1	1	1	1	0.5	0	0.66	0.222	0.43	0	0.262	0	0.429	0.75	0.714	0.273	0.5	0.8	0.8	0.417	0.444	0.6	0.8	0.75	0.889
Jamaica	JAM	2017	60	35.8	58.8375	59.1417	35	49.7558	0.6	0.5	0.574	0	0.607833	0.535167	0.4445	0.8335	0.666667	0.6	1	0.099	-99	0.35	-99	0	0	1	1	1	0.5	0.496	0.721	0.495	0.51	0.65	0.574	0	0.429	0.778	0.81	0.455	0.375	0.8	0.8	0.417	0.444	0.4	0.4	0.75	0.889
Sierra Leone	SLE	2017	80	61	64.35	22.1083	20	49.4917	0.8	0.5	0.33	1	0.717833	0.497333	0.6945	0.808	0.333333	0.4	0	0.151	-99	0.2	-99	0	1	1	1	1	0.5	0	0.793	0.354	0.504	0	0.33	1	0.429	0.778	0.714	0.636	0.75	1	0.8	0.462	0.222	0.4	0.6	0.5	0.889
Maldives	MDV	2017	70	30.0667	64.55	47.6333	35	49.45	0.7	0.5	0.402	0	0.691667	0.5195	0.889	0.6415	0.333333	0.468	1	0.104	-99	0.35	-99	0	1	1	1	0.5	0.5	0.628	0.763	0.217	0.4	0	0.402	0	0.857	0.375	0.857	0.636	0.625	0.8	0.8	0.417	0.333	0.4	0.667	0.5	0.778
Sao Tome and Principe	STP	2017	60	58.3667	47.025	46.6667	35	49.4117	0.6	0.5	0.251	1	0.499333	0.365667	0.4445	0.7225	0.666667	0.2	1	0	-99	0.35	-99	0	1	1	1	0	0.5	0.401	0.448	0.382	0.024	0	0.251	1	0.429	0.5	0.762	0.455	0.25	0.6	0.8	0.25	0.111	0.333	0.2	0.5	0.889
Nigeria	NGA	2017	56.6	61.0333	55.0938	33.3	40	49.2054	0.566	0.5	0.331	1	0.610333	0.4935	0.4445	0.6515	0.5	0.532	0	0.3	-99	0.4	-99	0	1	0.33	1	0.5	0.5	0.266	0.748	0.348	0.294	0	0.331	1	0.286	0.889	0.714	0.273	0.5	1	0.8	0.417	0.444	0.4	0.4	0.5	0.889
Iran, Islamic Rep.	IRN	2017	80	26.7667	53.025	55.9167	30	49.1417	0.8	0.5	0.303	0	0.5725	0.516667	0.4445	0.53	0.666667	0.4	1	0.17	-99	0.3	-99	1	0	1	1	1	0.5	0.175	0.859	0.089	0.393	0	0.303	0	0.429	0.444	0.857	0.455	0.25	1	0.933	0.333	0.667	0.5	0.167	0.5	0.889
Benin	BEN	2017	70	55.5667	54.4937	33.2917	30	48.6704	0.7	0.5	0.167	1	0.606	0.503667	0.389	0.6415	0.666667	0.6	0	0.065	-99	0.3	-99	0.5	1	1	1	0	0.5	0.114	0.392	0.16	0.17	0	0.167	1	0.571	0.667	0.762	0.636	0.25	0.75	0.933	0.417	0.222	0.5	0.2	0.75	0.778
Lao PDR	LAO	2017	90	40.9	55.1688	40.6333	15	48.3404	0.9	0	0.227	1	0.611	0.452667	0.4445	0.778	0.833333	0.6	0	0.192	-99	0.15	-99	0.5	1	1	1	1	0	0	0.579	0.137	0.419	0	0.227	1	0.143	0.625	0.762	0.636	0.5	1	0.933	0.417	0.333	0.333	0.2	0.5	0.889
Seychelles	SYC	2017	40	44.9	52.575	53.8667	50	48.2683	0.4	1	0.347	0	0.498333	0.4685	0.6945	0.611	0.666667	0.466	1	0.022	-99	0.5	-99	0	0	1	1	0	1	0.335	0.739	0.277	0.381	0	0.347	0	0.714	0.5	0.762	0.364	0.25	0.4	0.8	0.167	0.444	0.4	0.5	0.5	0.889
Venezuela, RB	VEN	2017	60	60.0667	55.8563	39.9167	25	48.1679	0.6	0.5	0.302	1	0.519	0.521833	0.6945	0.6515	0.666667	0.266	0.5	0.164	-99	0.25	-99	0	1	1	1	0	0.5	0.491	0.342	0.308	0.369	0	0.302	1	0.714	0.444	0.667	0.364	0.125	0.8	0.8	0.231	0.667	0.333	0.6	0.5	0.889
St. Lucia	LCA	2017	60	55.7667	52.5312	51.6667	20	47.9929	0.6	0.5	0.173	1	0.487	0.460167	0.6945	0.6665	0.666667	0.4	1	0	-99	0.2	-99	0	0	1	1	1	0.5	0.024	0.554	0.265	0.024	0	0.173	1	0.571	0.5	0.762	0.364	0.125	0.6	0.8	0.167	0.111	0.333	0.6	0.75	0.889
Liberia	LBR	2017	90	29.2	61.1625	33.8417	25	47.8408	0.9	0.5	0.376	0	0.641667	0.540667	0.6945	0.6515	0.666667	0.534	0	0.153	-99	0.25	-99	1	1	1	1	0.5	0.5	0.367	0.763	0.391	0.358	0	0.376	0	0.714	0.667	0.714	0.455	0.5	0.8	0.933	0.5	0.111	0.4	0.8	0.5	0.889
Bahrain	BHR	2017	90	30.9333	40.925	38.1333	35	46.9983	0.9	0.5	0.428	0	0.3925	0.49	0.278	0.3485	0.333333	0.066	1	0.126	-99	0.35	-99	1	1	1	1	0.5	0.5	0.604	0.783	0.314	0.439	0	0.428	0	0	0.375	0.8	0.455	0.125	0.6	1	0.231	0.625	0.167	0.167	0.75	0.556
Gambia, The	GMB	2017	60	59.0667	62.6562	27.7417	25	46.8929	0.6	0.5	0.272	1	0.679667	0.518167	0.889	0.53	0.666667	0.4	0	0.043	-99	0.25	-99	0	1	1	1	0	0.5	0	0.697	0.273	0.391	0	0.272	1	1	0.625	0.714	0.364	0.375	1	0.933	0.154	0.222	0.5	0.8	0.5	0.778
Angola	AGO	2017	70	24.4	70.8812	28.1667	40	46.6896	0.7	0.5	0.232	0	0.675167	0.659333	0.9445	0.7225	0.666667	0.4	0	0.06	-99	0.4	-99	0	1	1	1	0.5	0.5	0.076	0.546	0.221	0.315	0	0.232	0	0.714	0.778	0.714	0.545	0.5	0.8	0.933	0.417	0.556	0.5	0.8	0.75	0.889
Algeria	DZA	2017	70	26.2333	55.3813	51.8917	25	45.7013	0.7	0.5	0.287	0	0.516667	0.561167	0.4445	0.7525	0.666667	0.266	1	0.143	-99	0.25	-99	0	1	1	0.5	1	0.5	0.123	0.68	0.227	0.407	0	0.287	0	0.286	0.444	0.85	0.545	0.375	0.6	0.8	0.5	0.75	0.4	0.167	0.75	0.889
Eswatini	SWZ	2017	90	19.3	67.4688	16.6833	35	45.6904	0.9	0.5	0.079	0	0.695667	0.5935	0.9445	0.5855	0.333333	0.334	0	0	-99	0.35	-99	0.5	1	1	1	1	0.5	0	0.188	0.103	0.103	0	0.079	0	0.714	0.778	0.762	0.545	0.375	1	0.8	0.417	0.444	0.6	0.8	0.5	0.889
Nicaragua	NIC	2017	90	26.6	59.2125	27.325	25	45.6275	0.9	0.5	0.298	0	0.558667	0.5295	0.6945	0.778	0.5	0.468	0	0.125	-99	0.25	-99	0.5	1	1	1	1	0.5	0.238	0.715	0.138	0.4	0	0.298	0	0.857	0.444	0.762	0.364	0.125	0.8	0.8	0.333	0.444	0.5	0.6	0.5	0.889
Timor-Leste	TLS	2017	50	24.0667	62.4188	32.7083	55	44.8387	0.5	0.5	0.222	0	0.679333	0.475833	0.6945	0.8335	0.333333	0.734	0	0.241	-99	0.55	-99	0.5	0	0	1	1	0.5	0	0.649	0.113	0.348	0	0.222	0	0.857	0.625	0.714	0.455	0.625	0.8	0.8	0.5	0.222	0.333	0.5	0.5	0.889
Uzbekistan	UZB	2017	70	5.9	52.225	30	65	44.625	0.7	0	0.177	0	0.546333	0.4945	0.4445	0.611	0	0.2	1	0	-99	0.65	-99	0	1	1	1	0.5	0	0	0.402	0.164	0.32	0	0.177	0	0.429	0.75	0.81	0.364	0.125	0.8	0.8	0.333	0.667	0.5	0.167	0.5	0.889
Afghanistan	AFG	2017	70	24.0333	70.4313	13.425	35	42.5779	0.7	0.5	0.221	0	0.684667	0.619333	0.9445	0.778	0	0.466	0	0.071	-99	0.35	-99	0	1	1	1	0.5	0.5	0.265	0.516	0.165	0.159	0	0.221	0	0.714	0.889	0.8	0.455	0.5	0.75	0.933	0.5	0.333	0.4	0.8	0.75	0.889
Yemen, Rep.	YEM	2017	90	25.5333	51.2563	20.4167	25	42.4412	0.9	0.5	0.266	0	0.546667	0.454833	0.4445	0.6515	0.166667	0.402	0	0.248	-99	0.25	-99	0.5	1	1	1	1	0.5	0.825	0.14	0.117	0.129	0.117	0.266	0	0.429	0.429	0.667	0.455	0.5	0.8	0.8	0.385	0.444	0.4	0.2	0.5	0.889
Bahamas, The	BHS	2017	100	26.3333	34.7	25.8333	25	42.3733	1	0.5	0.29	0	0.2585	0.4075	0.278	0.5	0.333333	0.2	0.5	0	-99	0.25	-99	1	1	1	1	1	0.5	0.048	0.763	0.215	0.424	0	0.29	0	0	0.143	0.81	0.273	0.125	0.2	1	0.25	0.111	0.167	0.167	0.75	0.556
Guinea	GIN	2017	70	62	52.8625	19.2583	5	41.8242	0.7	0.5	0.36	1	0.499667	0.446167	0.6945	0.697	0.333333	0.268	0	0.169	-99	0.05	-99	0.5	1	1	1	0	0.5	0	0.933	0.382	0.485	0	0.36	1	0.286	0.625	0.667	0.545	0.125	0.75	0.933	0.333	0.111	0.4	0.4	0.5	0.889
Suriname	SUR	2017	40	28.4333	43.1812	52.3667	45	41.7963	0.4	0.5	0.353	0	0.42	0.4185	0.4445	0.4945	0.666667	0.268	1	0.16	-99	0.45	-99	0	0	0	1	1	0.5	0.23	0.775	0.387	0.35	0.024	0.353	0	0.143	0.444	0.81	0.273	0.25	0.6	0.8	0.167	0.444	0.4	0.2	0.5	0.889
Madagascar	MDG	2017	90	18.3	58.45	11.7	30	41.69	0.9	0.5	0.049	0	0.542	0.5815	0.6945	0.611	0	0.468	0	0	-99	0.3	-99	0.5	1	1	1	1	0.5	0	0.18	0.019	0.048	0	0.049	0	0.429	0.556	0.762	0.455	0.25	0.8	0.933	0.5	0.556	0.4	0.6	0.5	0.889
Guinea-Bissau	GNB	2017	60	61.0667	50.975	13.3333	20	41.075	0.6	0.5	0.332	1	0.511833	0.4545	0.639	0.54	0.333333	0.2	0	0	-99	0.2	-99	0	1	1	1	0	0.5	0.248	0.641	0.386	0.387	0	0.332	1	0.429	0.625	0.619	0.273	0.375	0.75	0.933	0.25	0.111	0.333	0.6	0.5	0.778
Trinidad and Tobago	TTO	2017	60	28.5667	44.7375	41.6833	30	40.9975	0.6	0.5	0.357	0	0.3605	0.451	0.5835	0.561	0.333333	0.334	1	0	-99	0.3	-99	0	0	1	1	1	0.5	0.474	0.548	0.397	0.221	0.143	0.357	0	0.143	0.444	0.619	0.182	0.375	0.4	0.8	0.25	0.556	0.2	0.4	0.5	0.667
Mauritania	MRT	2017	70	28.3333	51.5812	24.0083	30	40.7846	0.7	0.5	0.35	0	0.6155	0.398	0.4445	0.6415	0.333333	0.534	0	0.093	-99	0.3	-99	0.5	0	1	1	1	0.5	0.234	0.793	0.31	0.411	0	0.35	0	0.571	0.778	0.714	0.455	0.375	0.8	0.8	0.333	0.222	0.333	0.2	0.5	0.889
Vanuatu	VUT	2017	46.6	59.4333	51.6875	29.8167	15	40.5075	0.466	0.5	0.283	1	0.479167	0.445333	0.6945	0.667	0.666667	0.334	0	0.192	-99	0.15	-99	0	1	0.33	1	0	0.5	0	0.726	0.254	0.434	0	0.283	1	0.429	0.5	0.714	0.182	0.25	0.8	0.8	0.25	0.222	0.4	0.5	0.5	0.889
Haiti	HTI	2017	80	20.8	50.025	20.85	20	38.335	0.8	0.5	0.124	0	0.535833	0.414333	0.4445	0.707	0.5	0.334	0	0	-99	0.2	-99	1	1	1	1	0	0.5	0	0.323	0.138	0.161	0	0.124	0	0.286	0.556	0.8	0.273	0.5	0.8	0.933	0.231	0.222	0.4	0.2	0.5	0.889
St. Vincent and the Grenadines	VCT	2017	40	25.7	49.1063	39.7833	35	37.9179	0.4	0.5	0.271	0	0.454	0.401833	0.6945	0.6665	0.333333	0.066	1	0.192	-99	0.35	-99	0	1	1	0	0	0.5	0.071	0.625	0.301	0.301	0.056	0.271	0	0.429	0.444	0.762	0.364	0.125	0.6	0.8	0.167	0.111	0.333	0.5	0.5	0.889
Lebanon	LBN	2017	40	28.2333	58.0812	48.2583	15	37.9146	0.4	0.5	0.347	0	0.549667	0.458333	0.9445	0.678	0.333333	0.334	1	0.263	-99	0.15	-99	0	0	1	1	0	0.5	0.65	0.498	0.231	0.358	0	0.347	0	0.571	0.667	0.571	0.364	0.125	1	0.6	0.25	0.333	0.4	0.667	0.5	0.889
Congo, Rep.	COG	2017	60	27.7	49.125	31.3167	20	37.6283	0.6	0.5	0.331	0	0.531	0.445667	0.4445	0.5555	0.666667	0.334	0	0.252	-99	0.2	-99	0	1	1	1	0	0.5	0	0.793	0.396	0.467	0	0.331	0	0.143	0.667	0.762	0.364	0.25	1	0.933	0.308	0.333	0.4	0.2	0.5	0.889
Solomon Islands	SLB	2017	60	26.5667	58.2313	19.8833	20	36.9363	0.6	0.5	0.297	0	0.5955	0.4665	0.6945	0.778	0.333333	0.266	0	0.196	-99	0.2	-99	0	1	1	0.5	0.5	0.5	0.079	0.635	0.33	0.442	0	0.297	0	0.714	0.667	0.762	0.455	0.375	0.6	0.8	0.333	0.333	0.333	0.5	0.5	0.889
Iraq	IRQ	2017	40	24.8667	49.075	26.225	40	36.0333	0.4	0.5	0.246	0	0.418	0.520333	0.6945	0.4165	0.5	0.4	0	0.149	-99	0.4	-99	0.5	0	0	1	0.5	0.5	0.095	0.745	0.184	0.207	0	0.246	0	0.286	0.444	0.762	0.091	0.125	0.8	0.8	0.333	0.556	0.333	0.6	0.5	0.889
Sudan	SDN	2017	53.4	21.2667	62.8937	27.3667	15	35.9854	0.534	0.5	0.138	0	0.628667	0.5165	0.9445	0.6515	0.666667	0.4	0	0.028	-99	0.15	-99	0	1	0.67	1	0	0.5	0.095	0.306	0.09	0.199	0	0.138	0	0.857	0.8	0.667	0.273	0.375	0.8	0.8	0.333	0.333	0.333	0.8	0.5	0.889
Papua New Guinea	PNG	2017	60	22.3667	49.125	18.8333	15	33.065	0.6	0.5	0.171	0	0.43	0.4685	0.6945	0.54	0.333333	0.2	0	0.22	-99	0.15	-99	0	1	1	1	0	0.5	0.048	0.442	0.184	0.179	0	0.171	0	0.429	0.286	0.667	0.273	0.125	0.8	0.8	0.167	0.444	0.4	0.5	0.5	0.889
Congo, Dem. Rep.	COD	2017	53.4	24.7	53.2062	17.65	15	32.7912	0.534	0.5	0.241	0	0.581833	0.471667	0.4445	0.6515	0	0.466	0	0.24	-99	0.15	-99	0	1	0.67	1	0	0.5	0	0.601	0.282	0.324	0	0.241	0	0.286	0.75	0.7	0.455	0.5	0.8	0.933	0.308	0.556	0.333	0.2	0.5	0.889
Guyana	GUY	2017	40	23.9667	59.0625	15.5333	25	32.7125	0.4	0.5	0.219	0	0.603833	0.525833	0.5835	0.7525	0.333333	0.266	0	0.022	-99	0.25	-99	0	1	1	0	0	0.5	0	0.53	0.241	0.322	0	0.219	0	0.429	0.75	0.905	0.364	0.375	0.8	0.933	0.5	0.222	0.4	0.6	0.5	0.667
Chad	TCD	2017	60	18.2	51.45	13.8833	15	31.7067	0.6	0.5	0.046	0	0.6055	0.449833	0.4445	0.5055	0.333333	0.2	0	0.022	-99	0.15	-99	0	1	1	1	0	0.5	0.037	0.085	0.042	0.066	0	0.046	0	0.143	0.667	0.762	0.636	0.625	0.8	0.933	0.333	0.333	0.4	0.2	0.5	0.889
Djibouti	DJI	2017	40	26.4333	41.875	24.3917	15	29.54	0.4	0.5	0.293	0	0.410333	0.363	0.4445	0.5855	0.666667	0.266	0	0.043	-99	0.15	-99	0	0	1	1	0	0.5	0.159	0.689	0.297	0.321	0	0.293	0	0.429	0.286	0.667	0.455	0.125	0.5	0.867	0.167	0.111	0.333	0.2	0.5	0.889
Gabon	GAB	2017	40	23.7333	42.425	13.8333	20	27.9983	0.4	0.5	0.212	0	0.402167	0.414333	0.389	0.5555	0.333333	0.198	0	0.022	-99	0.2	-99	0	0	1	1	0	0.5	0.119	0.435	0.241	0.265	0	0.212	0	0.429	0.444	0.524	0.091	0.125	0.8	0.933	0.231	0.222	0.4	0.2	0.5	0.778
Kiribati	KIR	2017	20	25.7667	47.2	13.8833	15	24.37	0.2	0.5	0.273	0	0.376	0.4845	0.639	0.5555	0.333333	0.2	0	0.022	-99	0.15	-99	0	0	0	1	0	0.5	0.251	0.594	0.249	0.273	0	0.273	0	0.286	0.333	0.714	0.273	0.25	0.4	0.933	0.308	0.333	0.333	0.5	0.5	0.778
Micronesia, Fed. Sts.	FSM	2017	20	24.1	45.6063	15.2833	15	23.9979	0.2	0.5	0.223	0	0.430167	0.448	0.6945	0.3195	0.333333	0.134	0	0.144	-99	0.15	-99	0	0	0	1	0	0.5	0.203	0.46	0.199	0.256	0	0.223	0	0.571	0.286	0.476	0.273	0.375	0.6	0.8	0.333	0.222	0.333	0.5	0.5	0.889
South Sudan	SSD	2017	20	8.43333	45.1625	17.8083	25	23.2808	0.2	0	0.253	0	0.428833	0.443	0.6945	0.303	0.333333	0.198	0	0.181	-99	0.25	-99	0	0	0	1	0	0	0.133	0.557	0.278	0.297	0	0.253	0	0.571	0.375	0.429	0.273	0.125	0.8	0.8	0.25	0.222	0.286	0.6	0.5	0.889
Libya	LBY	2017	20	19.4667	37.9875	18.7	20	23.2308	0.2	0.5	0.084	0	0.39	0.363833	0.4445	0.333	0.5	0.134	0	0.114	-99	0.2	-99	0	0	0	1	0	0.5	0	0	0.113	0.307	0	0.084	0	0.143	0.714	0.667	0.091	0.125	0.6	0.6	0.25	0.333	0.333	0.167	0.5	0.889
Turkmenistan	TKM	2017	46.6	6.06667	42.875	12.2333	5	22.555	0.466	0	0.182	0	0.435	0.406833	0.4445	0.46	0.333333	0.134	0	0.022	-99	0.05	-99	0	1	0.33	1	0	0	0	0.446	0.232	0.232	0	0.182	0	0.143	0.625	0.81	0.182	0.25	0.6	0.8	0.308	0.333	0.333	0.167	0.5	0.889
Syrian Arab Republic	SYR	2017	6.6	22.3667	38.1562	16.7667	25	21.7779	0.066	0.5	0.171	0	0.325167	0.423833	0.4445	0.361	0.166667	0.4	0	0.104	-99	0.25	-99	0	0	0.33	0	0	0.5	0.037	0.586	0.185	0.048	0	0.171	0	0	0.286	0.667	0.273	0.125	0.6	0.8	0.154	0.556	0.333	0.2	0.5	0.889
Marshall Islands	MHL	2017	20	25.1333	44.1437	11.4833	0	20.1521	0.2	0.5	0.254	0	0.414333	0.420333	0.639	0.3885	0.333333	0.066	0	0.06	-99	0	-99	0	0	0	1	0	0.5	0	0.634	0.317	0.317	0	0.254	0	0.429	0.571	0.381	0.455	0.25	0.4	0.8	0.167	0.222	0.333	0.5	0.5	0.778
Somalia	SOM	2017	16.6	2.06667	40.1812	0	0	11.7696	0.166	0	0.062	0	0.316833	0.4255	0.6945	0.293	0	0	0	0	-99	0	-99	0	0	0.33	0.5	0	0	0	0.143	0.024	0.048	0.095	0.062	0	0.286	0.375	0.524	0.091	0.125	0.5	0.6	0.231	0.222	0.4	0.6	0.5	0.889
American Samoa	ASM	2017	30		18.3938				0.3	0			0.105667	0.136167	0.5835	0.1625			1		-99		-99	1	0	0	0.5	0	0								0.143	0	0.091	0	0	0.4	0.4	0	0	0	0.167	0.25	0.667
Andorra	AND	2017	60		25.8875				0.6	0			0.2485	0.210167	0.3335	0.3615	0.333333	0.4	1		-99		-99	1	0	1	1	0	0								0.143	0	0.55	0.273	0.125	0.4	0.6	0.077	0	0.167	0.167	0.25	0.667
Antigua and Barbuda	ATG	2017	20		52.7313		20		0.2	0.5		0	0.472833	0.5555	0.639	0.4945	0.666667	0.066	1		-99	0.2	-99	0	0	1	0	0	0.5							0	0.571	0.286	0.8	0.455	0.125	0.6	1	0.25	0.25	0.333	0.5	1	0.778
Aruba	ABW	2017	60		19.1812				0.6	0			0.1235	0.207333	0.278	0.264			1		-99		-99	1	0	1	1	0	0								0.143	0.125	0.091	0.182	0	0.2	0.8	0.083	0.111	0	0	0.25	0.556
Barbados	BRB	2017	80		45.3875		25		0.8	0.5		0	0.389	0.476833	0.528	0.5055	0.333333	0.134	1		-99	0.25	-99	1	0	1	1	1	0.5							0	0.286	0.125	0.8	0.273	0.25	0.6	1	0.333	0.111	0.167	0.5	0.75	0.556
Bermuda	BMU	2017	60		18.2125				0.6	0			0.151167	0.144167	0.278	0.293			1		-99		-99	1	0	1	1	0	0								0.143	0	0.091	0.273	0	0.4	0.6	0.154	0.111	0	0	0	0.556
British Virgin Islands	VGB	2017	40		15.4313				0.4	0			0.1015	0.175667	0.278	0.125			1		-99		-99	1	0	1	0	0	0								0	0	0.045	0.364	0	0.2	0.4	0.154	0	0	0	0.5	0.556
Brunei Darussalam	BRN	2017	100		40.2938		35		1	0.5		0	0.323167	0.5055	0.3335	0.404	0.333333	0.334	1		-99	0.35	-99	1	1	1	1	1	0.5							0	0	0.222	0.762	0.455	0.25	0.25	1	0.583	0.333	0.2	0.167	0.75	0.667
Cayman Islands	CYM	2017	40		16.85				0.4	0			0.0711667	0.187833	0.278	0.293			1		-99		-99	1	0	1	0	0	0								0	0	0.045	0.182	0	0.2	0.8	0.077	0	0	0	0.25	0.556
Central African Republic	CAF	2017	20		46.65		15		0.2	0.5		0	0.444	0.4435	0.6945	0.375	0.166667	0.132	0		-99	0.15	-99	0	0	1	0	0	0.5							0	0.429	0.375	0.571	0.364	0.125	0.8	0.8	0.25	0.111	0.4	0.6	0.5	0.889
Channel Islands	CHI	2017	60						0.6	0											-99		-99	1	0	1	1	0	0
Comoros	COM	2017	60		54.8875		20		0.6	0.5		0	0.478667	0.512	0.9445	0.4745	0.166667	0.334	0		-99	0.2	-99	0	0	1	1	1	0.5							0	0.857	0.143	0.667	0.455	0.25	0.5	0.8	0.417	0.222	0.333	0.8	0.5	0.889
Cuba	CUB	2017	70		48.6938				0.7	0	0.298		0.516333	0.4395	0.4445	0.5835			1	0.164	-99		-99	1	1	0	1	0.5	0	0.393	0.522	0.107	0.467	0	0.298		0.143	0.375	0.95	0.455	0.375	0.8	0.6	0.231	0.556	0.333	0.167	0.75	0.889
Curacao	CUW	2017	40		15.075				0.4	0			0.0485	0.219167	0.278	0.125			1		-99		-99	1	0	1	0	0	0								0	0	0.091	0	0	0.2	0.8	0.154	0.111	0	0	0.25	0.556
Dominica	DMA	2017	20		46.3312		35		0.2	0.5		0	0.4255	0.401833	0.639	0.5855	0.666667	0.2	1		-99	0.35	-99	0	0	1	0	0	0.5							0	0.429	0.444	0.5	0.455	0.125	0.6	0.8	0.167	0.111	0.333	0.5	0.5	0.778
Equatorial Guinea	GNQ	2017	0		45.8438		20		0	0		0	0.382	0.479333	0.6945	0.389	0.666667	0.066	0		-99	0.2	-99	0	0	0	0	0	0							0	0.429	0.25	0.524	0.364	0.125	0.6	1	0.154	0.222	0.4	0.6	0.5	0.889
Eritrea	ERI	2017	6.6		39.3		10		0.066	0		0	0.409833	0.392333	0.4445	0.293	0	0	0		-99	0.1	-99	0	0	0.33	0	0	0							0	0	0.429	0.65	0.455	0.125	0.8	0.8	0.154	0.333	0.4	0.167	0.5	0.889
Faroe Islands	FRO	2017	60		10.5437				0.6	0			0.0616667	0.0666667	0.278	0.1805			1		-99		-99	1	0	1	1	0	0								0	0.125	0.045	0	0	0.2	0.4	0	0	0	0	0	0.556
French Polynesia	PYF	2017	60		13.5875				0.6	0			0.036	0.1545	0.3335	0.182			1		-99		-99	1	0	1	1	0	0								0	0.125	0.091	0	0	0	0.6	0.077	0	0	0	0.25	0.667
Gibraltar	GIB	2017	60		11.9187				0.6	0			0.134833	0.0851667	0.1665	0.127			1		-99		-99	1	0	1	1	0	0								0	0	0.045	0.364	0	0.4	0.4	0	0.111	0	0	0	0.333
Greenland	GRL	2017	50		11.875				0.5	0			0.0818333	0.0795	0.3335	0.1325			1		-99		-99	1	0	1	0.5	0	0								0	0	0.091	0	0	0.4	0.4	0.077	0	0	0	0	0.667
Grenada	GRD	2017	50		44.0438		20		0.5	0.5		0	0.443333	0.387833	0.4445	0.5855	0.666667	0.2	1		-99	0.2	-99	0	1	1	0.5	0	0.5							0	0.143	0.375	0.762	0.455	0.125	0.8	0.8	0.25	0.111	0.333	0.333	0.5	0.889
Guam	GUM	2017	60		13.9938				0.6	0			0.0818333	0.141667	0.278	0.171			1		-99		-99	1	0	1	1	0	0								0	0	0.091	0	0	0.4	0.6	0	0	0	0	0.25	0.556
Hong Kong SAR, China	HKG	2017	80		29.925				0.8	1	0.6		0.220167	0.3	0.3335	0.5			1	0.022	-99		-99	1	0	1	1	1	1	0.785	0.967	0.601	0.646	0	0.6		0	0.25	0.091	0.455	0.125	0.4	0.6	0.25	0.5	0.2	0	0.25	0.667
Isle of Man	IMN	2017	60		9.9				0.6	0			0.0571667	0.0905	0.1665	0.1825			1		-99		-99	1	0	1	1	0	0								0.143	0	0	0	0	0.2	0.4	0	0	0.143	0	0	0.333
Korea, Dem. People’s Rep.	PRK	2017	20		41.3				0.2	0			0.452333	0.394	0.4445	0.3205			0		-99		-99	1	0	0	0	0	0								0	0.625	0.8	0.364	0.125	0.8	0.8	0.231	0.333	0.333	0.167	0.5	0.889
Kosovo	XKX	2017	40	31.3667			55		0.4	0.5	0.441	0					0.666667	0.6		0.086	-99	0.55	-99	1	0	1	0	0	0.5	0.345	0.838	0.429	0.33	0.263	0.441	0
Liechtenstein	LIE	2017	60		23.0688				0.6	0	0.428		0.173	0.2105	0.3335	0.3615			1	0.082	-99		-99	1	0	1	1	0	0	0.301	0.748	0.341	0.374	0.374	0.428		0.143	0.143	0.045	0.182	0.125	0.4	0.4	0.077	0	0.286	0	0.5	0.667
Macao SAR, China	MAC	2017	80		23.9875				0.8	0.5	0.419		0.182167	0.216667	0.278	0.4445			1	0	-99		-99	1	0	1	1	1	0.5	0.615	0.652	0	0.502	0.326	0.419		0.143	0.25	0.045	0.455	0	0.2	0.6	0.167	0.333	0.2	0	0	0.556
Monaco	MCO	2017	60		26.2312				0.6	0			0.205833	0.215833	0.472	0.3615			1		-99		-99	1	0	1	1	0	0								0.143	0.143	0.333	0.091	0.125	0.4	0.2	0.077	0.125	0.143	0.5	0.25	0.444
Nauru	NRU	2017	20		35.9188		10		0.2	0		0	0.319167	0.394	0.389	0.345	0.333333	0.134	1		-99	0.1	-99	0	0	0	1	0	0							0	0.143	0.143	0.524	0.455	0.25	0.4	0.8	0.231	0.333	0.333	0.167	0.5	0.778
New Caledonia	NCL	2017	70		15.5062				0.7	0			0.142667	0.121167	0.3335	0.1155			1		-99		-99	1	0	1	1	0.5	0								0.143	0.222	0.091	0	0	0.4	0.4	0.077	0	0	0	0.25	0.667
Northern Mariana Islands	MNP	2017	60		9.825				0.6	0			0.0818333	0.0333333	0.3335	0.107			1		-99		-99	1	0	1	1	0	0								0	0	0.091	0	0	0.4	0.2	0	0	0	0	0	0.667
Palau	PLW	2017	30		36.9375		15		0.3	0.5		0	0.3335	0.3755	0.389	0.439	0.333333	0.134	1		-99	0.15	-99	0	0	1	0.5	0	0.5							0	0.143	0.286	0.524	0.273	0.375	0.4	0.8	0.231	0.222	0.333	0.167	0.5	0.778
Puerto Rico	PRI	2017	80		22.8813				0.8	0			0.187833	0.217167	0.3335	0.282			1		-99		-99	1	0	1	1	1	0								0	0.25	0.095	0.182	0	0.6	0.6	0.231	0.222	0	0	0.25	0.667
San Marino	SMR	2017	60		18.2688		55		0.6	0.5		0	0.171833	0.158	0.222	0.25			1		-99	0.55	-99	1	0	1	1	0	0.5							0	0	0.125	0.381	0	0.125	0.4	0.2	0.077	0.111	0.143	0.167	0.25	0.444
Sint Maarten (Dutch part)	SXM	2017	40		10.0188				0.4	0			0.0711667	0.0795	0.278	0.0715			1		-99		-99	1	0	1	0	0	0								0	0	0.045	0.182	0	0.2	0.4	0.077	0	0	0	0	0.556
St. Kitts and Nevis	KNA	2017	20		41.9562		20		0.2	0.5		0	0.332833	0.387833	0.639	0.5555	0.333333	0.066	1		-99	0.2	-99	0	0	1	0	0	0.5							0	0.429	0.25	0.429	0.364	0.125	0.4	0.8	0.083	0.111	0.333	0.5	0.5	0.778
St. Martin (French part)	MAF	2017	40		5.85625				0.4	0			0	0.075	0.1665	0.077			0		-99		-99	1	0	1	0	0	0								0	0	0	0	0	0	0.2	0	0	0	0	0.25	0.333
Taiwan, China	TWN	2017	40						0.4		0.463									0.022	-99		-99	1	0	0	0	1		0.581	0.663	0.412	0.317	0.341	0.463
Tonga	TON	2017	70		45.2563		35		0.7	0.5		0	0.342	0.429667	0.6945	0.611	0.5	0.266	0		-99	0.35	-99	0.5	1	1	1	0	0.5							0	0.571	0.25	0.524	0.182	0.125	0.4	0.8	0.167	0.111	0.5	0.5	0.5	0.889
Turks and Caicos Islands	TCA	2017	60		11.8688				0.6	0			0.0151667	0.1545	0.278	0.1625			1		-99		-99	1	0	1	1	0	0								0	0	0.091	0	0	0	0.6	0.077	0	0	0	0.25	0.556
Tuvalu	TUV	2017	10		34.2625		5		0.1	0.5		0	0.329333	0.3755	0.3335	0.293	0.333333	0.066	0		-99	0.05	-99	0	0	0	0.5	0	0.5							0	0.143	0.143	0.476	0.364	0.25	0.6	0.8	0.231	0.222	0.333	0.167	0.5	0.667
Virgin Islands (U.S.)	VIR	2017	60		8.78125				0.6	0			0.0075	0.108333	0.278	0.077			1		-99		-99	1	0	1	1	0	0								0	0	0.045	0	0	0	0.4	0	0	0	0	0.25	0.556
Italy	ITA	2016	100	93.4667	71.0875	86.9	100	90.2908	1	1	0.804	1	0.6945	0.712667	0.9445	0.521	1	0.934	1	0.542	1	1	1	1	1	1	1	1	1	0.933	0.755	0.467	0.933	0.933	0.804	1	0.857	0.7	0.81	0.7	0.5	0.6	0.8	0.75	0.714	0.429	0.833	0.75	0.889
United States	USA	2016	100	91.5333	64.05	92.6	100	89.6367	1	1	0.746	1	0.609667	0.591333	0.9375	0.5835	1	1	1	0.704	1	1	1	1	1	1	1	1	1	0.851	0.817	0.452	0.932	0.677	0.746	1	0.857	0.7	0.762	0.364	0.375	0.6	0.6	0.615	0.5	0.5	0.833	0.5	0.875
Sweden	SWE	2016	100	97.1	70.8063	72.2417	100	88.0296	1	1	0.913	1	0.664833	0.697833	0.9445	0.632	0.666667	0.8	1	0.423	1	1	1	1	1	1	1	1	1	0.967	0.917	0.862	0.946	0.875	0.913	1	1	0.7	0.714	0.6	0.375	0.6	0.8	0.75	0.625	0.429	0.833	0.75	0.889
Austria	AUT	2016	100	90.5	69.1937	80.25	100	87.9887	1	1	0.715	1	0.647	0.709667	0.9445	0.521	1	0.934	1	0.276	1	1	1	1	1	1	1	1	1	0.958	0.958	0.366	0.862	0.432	0.715	1	0.857	0.6	0.85	0.6	0.375	0.6	0.8	0.75	0.625	0.5	0.833	0.75	0.889
Finland	FIN	2016	100	92.3333	70.5563	74.4167	100	87.4613	1	1	0.77	1	0.6975	0.697833	0.9375	0.521	0.666667	0.8	1	0.51	1	1	1	1	1	1	1	1	1	0.796	0.912	0.664	0.718	0.76	0.77	1	1	0.7	0.81	0.7	0.375	0.6	0.8	0.75	0.625	0.429	0.833	0.75	0.875
Australia	AUS	2016	100	89.2667	69.525	78.2917	100	87.4167	1	1	0.678	1	0.688	0.659	0.9375	0.5835	0.666667	1	1	0.465	1	1	1	1	1	1	1	1	1	0.935	0.389	0.17	0.937	0.958	0.678	1	1	0.667	0.85	0.636	0.375	0.6	0.8	0.667	0.571	0.333	0.833	0.75	0.875
Slovenia	SVN	2016	100	91.1333	70.2313	72.9667	100	86.8662	1	1	0.734	1	0.680833	0.685	0.9445	0.5765	0.666667	0.934	1	0.318	1	1	1	1	1	1	1	1	1	0.958	0.958	0.455	0.794	0.503	0.734	1	1	0.7	0.81	0.6	0.375	0.6	0.8	0.75	0.714	0.429	0.667	0.75	0.889
Canada	CAN	2016	100	95.1	59.2062	82.0917	95	86.2796	1	1	0.853	1	0.619833	0.637167	0.4375	0.528	0.666667	1	1	0.617	1	0.95	1	1	1	1	1	1	1	0.883	1	0.479	0.904	1	0.853	1	0.571	0.778	0.85	0.545	0.375	0.6	0.8	0.583	0.857	0.5	0.333	0.75	0.875
Spain	ESP	2016	100	90.9	69.3625	75.1917	95	86.0908	1	1	0.727	1	0.665667	0.697833	0.9375	0.521	0.666667	1	1	0.341	1	0.95	1	1	1	1	1	1	1	0.904	0.976	0.417	0.838	0.5	0.727	1	0.857	0.7	0.762	0.7	0.375	0.6	0.8	0.75	0.625	0.429	0.833	0.75	0.875
Switzerland	CHE	2016	100	86.8333	71.8812	81.575	90	86.0579	1	1	0.605	1	0.661667	0.727333	0.9445	0.639	1	0.934	1	0.329	1	0.9	1	1	1	1	1	1	1	0.946	0.52	0.339	0.743	0.476	0.605	1	1	0.778	0.762	0.455	0.375	0.6	0.8	0.667	0.714	0.6	0.833	0.75	0.889
Germany	DEU	2016	100	90.6667	66.075	72.7917	95	84.9067	1	1	0.72	1	0.654	0.702833	0.6945	0.521	0.666667	0.934	1	0.311	1	0.95	1	1	1	1	1	1	1	0.866	0.911	0.455	0.451	0.917	0.72	1	0.714	0.7	0.81	0.6	0.5	0.6	0.8	0.75	0.75	0.5	0.667	0.75	0.889
France	FRA	2016	100	83.3667	70.8937	70.1417	100	84.8804	1	1	0.501	1	0.704167	0.697833	0.9445	0.521	0.666667	0.934	1	0.205	1	1	1	1	1	1	1	1	1	0.696	0.579	0.155	0.696	0.379	0.501	1	1	0.7	0.85	0.7	0.375	0.6	0.8	0.75	0.625	0.429	0.833	0.75	0.889
Portugal	PRT	2016	100	91.6333	64.275	63.9167	100	83.965	1	1	0.749	1	0.654	0.657167	0.6875	0.521	0.666667	0.866	1	0.024	1	1	1	1	1	1	1	1	1	1	0.905	0.432	0.958	0.452	0.749	1	0.714	0.7	0.81	0.6	0.5	0.6	0.8	0.75	0.714	0.429	0.5	0.75	0.875
Ireland	IRL	2016	100	89.2667	67.9688	67.4167	95	83.9304	1	1	0.678	1	0.64	0.684	0.9445	0.521	0.666667	0.866	1	0.164	1	0.95	1	1	1	1	1	1	1	0.667	0.858	0.646	0.426	0.796	0.678	1	1	0.6	0.81	0.455	0.375	0.6	0.8	0.667	0.625	0.429	0.833	0.75	0.889
Latvia	LVA	2016	100	91.4	54.0688	73.9417	100	83.8821	1	1	0.742	1	0.585667	0.6015	0.25	0.514	0.666667	0.934	1	0.357	1	1	1	1	1	1	1	1	1	0.925	0.943	0.476	0.868	0.5	0.742	1	0.429	0.7	0.81	0.6	0.375	0.6	0.8	0.667	0.625	0.6	0.167	0.75	0.5
Hungary	HUN	2016	100	85.5667	60.925	72.2667	100	83.7517	1	1	0.567	1	0.623167	0.614833	0.5835	0.5765	0.666667	0.934	1	0.29	1	1	1	1	1	1	1	1	1	0.892	0.844	0.354	0.724	0.024	0.567	1	0.714	0.7	0.85	0.5	0.375	0.6	0.8	0.75	0.556	0.333	0.5	0.75	0.667
Greece	GRC	2016	100	83.2667	63.1375	71.3417	95	82.5492	1	1	0.498	1	0.637333	0.641167	0.6945	0.521	0.666667	0.934	1	0.253	1	0.95	1	1	1	1	1	1	1	0.393	0.523	0	0.656	0.917	0.498	1	0.714	0.7	0.81	0.5	0.5	0.6	0.8	0.75	0.714	0.5	0.333	0.75	0.889
Slovak Republic	SVK	2016	90	82.7	63.1187	75.1917	100	82.2021	0.9	1	0.481	1	0.633167	0.626333	0.6945	0.5765	0.666667	0.934	1	0.407	1	1	1	1	1	1	0.5	1	1	0.605	0.774	0.354	0.536	0.135	0.481	1	0.714	0.6	0.81	0.7	0.375	0.6	0.8	0.75	0.625	0.5	0.333	0.75	0.889
United Kingdom	GBR	2016	100	84.9667	69.55	65.5167	90	82.0067	1	1	0.549	1	0.669833	0.714833	0.9445	0.4655	0.666667	0.866	1	0.088	1	0.9	1	1	1	1	1	1	1	0.758	0.38	0.111	0.702	0.792	0.549	1	0.857	0.7	0.762	0.6	0.5	0.6	0.8	0.692	0.714	0.5	0.833	0.75	0.889
Poland	POL	2016	100	60	66.8563	81.7417	100	81.7196	1	1	0.8	0	0.687333	0.671833	0.6945	0.5765	0.666667	0.934	1	0.669	1	1	1	1	1	1	1	1	1	0.925	0.905	0.432	0.842	0.898	0.8	0	0.714	0.8	0.81	0.7	0.5	0.6	0.8	0.667	0.714	0.6	0.5	0.75	0.889
Estonia	EST	2016	100	59.5	64.0062	79.4667	100	80.5946	1	1	0.785	0	0.713667	0.655167	0.5	0.514	0.666667	0.934	1	0.578	1	1	1	1	1	1	1	1	1	1	1	0.5	0.925	0.5	0.785	0	0.857	0.7	0.85	0.7	0.375	0.8	0.8	0.667	0.714	0.5	0.5	0.75	0.5
Turkey	TUR	2016	100	80.9333	81.0187	65.4417	75	80.4788	1	1	0.428	1	0.758667	0.813833	0.9375	0.8265	0.666667	0.734	1	0.217	-99	0.75	-99	1	1	1	1	1	1	0.815	0.123	0.075	0.698	0.432	0.428	1	1	0.9	0.952	0.6	0.5	0.6	1	0.583	0.75	0.75	0.8	1	0.875
Mexico	MEX	2016	100	93.2333	82.3125	76.225	50	80.3542	1	1	0.797	1	0.845833	0.761167	0.9375	0.8265	1	0.734	1	0.315	-99	0.5	-99	1	1	1	1	1	1	0.958	0.802	0.348	0.917	0.958	0.797	1	1	1	0.905	0.545	0.625	1	1	0.667	0.75	0.4	1	0.75	0.875
Chile	CHL	2016	100	81.0333	76.1312	66.2417	75	79.6813	1	1	0.431	1	0.801833	0.716667	0.9445	0.5905	0.666667	0.6	1	0.383	1	0.75	1	1	1	1	1	1	1	0.604	0.587	0.021	0.626	0.317	0.431	1	1	0.9	0.9	0.636	0.375	1	1	0.75	0.75	0.5	0.8	0.5	0.889
Armenia	ARM	2016	100	84.4667	75.65	60.2417	75	79.0717	1	1	0.534	1	0.778	0.713833	0.6945	0.882	0.666667	0.6	1	0.143	-99	0.75	-99	1	1	1	1	1	1	0.817	0.785	0.383	0.687	0	0.534	1	0.857	0.889	0.952	0.545	0.625	0.8	0.933	0.75	0.5	0.5	0.6	1	0.889
New Zealand	NZL	2016	100	91.7667	62.2062	65.8417	75	78.9629	1	1	0.753	1	0.544	0.6055	0.9445	0.5835	0.666667	0.8	1	0.167	1	0.75	1	1	1	1	1	1	1	0.904	0.769	0.293	0.824	0.976	0.753	1	0.857	0.375	0.762	0.545	0.125	0.6	0.8	0.5	0.75	0.5	0.833	0.25	0.889
Norway	NOR	2016	100	62.6	66.0938	75.4167	90	78.8221	1	1	0.878	0	0.642	0.696833	0.6875	0.5835	0.666667	1	1	0.35	1	0.9	1	1	1	1	1	1	1	1	1	0.892	1	0.5	0.878	0	0.714	0.778	0.81	0.7	0.25	0.6	0.8	0.75	0.714	0.5	0.667	0.75	0.875
Kyrgyz Republic	KGZ	2016	100	83.9333	72.5375	51.4833	85	78.5908	1	1	0.518	1	0.790333	0.590667	0.9445	0.7155	0.333333	0.4	1	0.326	-99	0.85	-99	1	1	1	1	1	1	0.661	0.602	0	0.829	0.5	0.518	1	1	0.667	0.905	0.545	0.625	1	0.933	0.5	0.444	0.5	0.667	0.5	0.889
Lithuania	LTU	2016	100	57.5667	55.5125	79.7667	100	78.5692	1	1	0.727	0	0.626	0.599667	0.25	0.514	0.666667	0.866	1	0.658	1	1	1	1	1	1	1	1	1	1	1	0.336	0.799	0.5	0.727	0	0.571	0.7	0.81	0.5	0.375	0.8	0.8	0.667	0.714	0.5	0.167	0.75	0.5
Netherlands	NLD	2016	100	61.6667	63.2625	65.7917	100	78.1442	1	1	0.85	0	0.662667	0.642333	0.625	0.521	0.666667	0.8	1	0.165	1	1	1	1	1	1	1	1	1	0.85	0.85	0.85	0.85	0.85	0.85	0	0.714	0.7	0.762	0.7	0.5	0.6	0.8	0.75	0.625	0.429	0.5	0.75	0.75
Czech Republic	CZE	2016	90	61.3333	70.1875	78.4917	90	78.0025	0.9	1	0.84	0	0.655	0.709667	0.9445	0.5765	0.666667	0.934	1	0.539	1	0.9	1	1	1	1	0.5	1	1	0.979	0.958	0.404	0.904	0.955	0.84	0	1	0.6	0.81	0.545	0.375	0.6	0.8	0.75	0.625	0.5	0.833	0.75	0.889
Denmark	DNK	2016	90	62.9	63.225	71.0917	100	77.4433	0.9	1	0.887	0	0.649833	0.654167	0.625	0.521	0.666667	0.866	1	0.311	1	1	1	1	1	1	0.5	1	1	1	1	0.5	0.933	1	0.887	0	0.714	0.6	0.81	0.8	0.375	0.6	0.8	0.75	0.625	0.5	0.5	0.75	0.75
Thailand	THA	2016	100	79.2667	76.7188	60.775	70	77.3521	1	1	0.378	1	0.771667	0.665333	0.9445	0.882	1	0.732	0.5	0.199	-99	0.7	-99	1	1	1	1	1	1	0.199	0.734	0.063	0.425	0.467	0.378	1	0.857	1	0.857	0.545	0.571	0.8	0.8	0.667	0.625	0.4	1	0.5	0.889
Korea, Rep.	KOR	2016	100	53.4	71.6437	75.7917	80	76.1671	1	1	0.602	0	0.707667	0.709833	0.9445	0.5345	0.666667	1	1	0.365	1	0.8	1	1	1	1	1	1	1	0.892	1	0.479	0.158	0.479	0.602	0	1	0.778	0.857	0.636	0.375	0.6	1	0.417	0.625	0.8	0.667	0.75	0.889
South Africa	ZAF	2016	83.4	85.2	78.4188	68.7417	65	76.1521	0.834	1	0.556	1	0.794833	0.7245	0.9445	0.771	0.666667	0.8	1	0.283	-99	0.65	-99	0.5	1	0.67	1	1	1	0.48	0.917	0.075	0.426	0.883	0.556	1	1	1	0.905	0.364	0.5	1	0.8	0.583	0.714	0.5	1	0.75	0.889
Egypt, Arab Rep.	EGY	2016	100	77.5	79.8563	62.3417	60	75.9396	1	1	0.325	1	0.8485	0.701333	0.9445	0.7945	0.666667	0.6	1	0.227	-99	0.6	-99	1	1	1	1	1	1	0	0.827	0	0.383	0.417	0.325	1	1	0.889	0.952	0.7	0.75	0.8	0.933	0.75	0.625	0.4	1	0.5	0.889
Mauritius	MUS	2016	90	85.6	65.8375	65.55	70	75.3975	0.9	1	0.568	1	0.633333	0.652333	0.6945	0.7155	1	0.534	1	0.088	-99	0.7	-99	0.5	1	1	1	1	1	0.875	0.851	0.063	0.554	0.5	0.568	1	0.857	0.6	0.857	0.636	0.25	0.6	0.8	0.583	0.714	0.4	0.667	0.75	0.889
Japan	JPN	2016	90	52.5	68.2	74.875	90	75.115	0.9	1	0.575	0	0.654333	0.655	0.9445	0.5835	1	0.666	1	0.329	1	0.9	1	1	1	1	0.5	1	1	0.929	0.071	0.021	0.901	0.955	0.575	0	1	0.556	0.85	0.545	0.375	0.6	0.8	0.583	0.714	0.5	0.833	0.5	0.889
Bulgaria	BGR	2016	100	52.5333	64.3187	73.2167	85	75.0138	1	1	0.576	0	0.640333	0.584	0.8335	0.639	0.666667	0.934	1	0.328	-99	0.85	-99	1	1	1	1	1	1	0.748	0.731	0.377	0.862	0.162	0.576	0	0.857	0.8	0.81	0.4	0.375	0.6	0.6	0.583	0.571	0.333	0.667	0.75	0.667
Belgium	BEL	2016	100	53.1333	60.4125	66.2167	95	74.9525	1	1	0.594	0	0.661833	0.627333	0.4445	0.521	0.666667	0.8	1	0.182	1	0.95	1	1	1	1	1	1	1	0.633	0.671	0.275	0.667	0.725	0.594	0	0.571	0.7	0.8	0.8	0.5	0.6	0.8	0.667	0.714	0.5	0.333	0.75	0.889
Israel	ISR	2016	100	81.8667	52.375	44.3083	95	74.71	1	1	0.456	1	0.592	0.4875	0.3125	0.639	0.333333	0.4	1	0.039	1	0.95	1	1	1	1	1	1	1	0.669	0.607	0	0.669	0.335	0.456	1	0.429	0.75	0.762	0.636	0.375	0.6	0.8	0.583	0.625	0.5	0.167	0.25	0.625
Georgia	GEO	2016	90	84.3333	64.9	54.3083	75	73.7083	0.9	1	0.53	1	0.6585	0.565167	0.6945	0.8265	0.333333	0.532	1	0.307	-99	0.75	-99	1	1	1	1	0.5	1	0.833	0.67	0.362	0.783	0	0.53	1	0.714	0.667	0.9	0.545	0.125	1	0.933	0.5	0.625	0.5	0.333	0.5	0.889
Malta	MLT	2016	100	80.9667	44.6187	70.8167	70	73.2804	1	1	0.429	1	0.520333	0.433333	0.25	0.4585	0.666667	0.934	1	0.232	-99	0.7	-99	1	1	1	1	1	1	0.33	0.605	0.235	0.336	0.638	0.429	1	0.429	0.556	0.762	0.4	0.375	0.6	0.6	0.5	0.5	0.333	0.167	0.5	0.5
Philippines	PHL	2016	100	79.4	68.8688	82.95	35	73.2438	1	1	0.382	1	0.704	0.644	0.6945	0.771	1	1	1	0.318	-99	0.35	-99	1	1	1	1	1	1	0.158	0.952	0.068	0.263	0.467	0.382	1	0.714	0.9	0.905	0.455	0.25	1	0.8	0.5	0.714	0.75	0.6	0.5	0.889
Brazil	BRA	2016	90	80.6	74.8438	64.2917	55	72.9471	0.9	1	0.418	1	0.727833	0.781833	0.6875	0.771	0.666667	0.6	1	0.305	-99	0.55	-99	1	1	1	1	0.5	1	0.713	0.465	0.207	0.658	0.048	0.418	1	0.857	0.778	0.857	0.5	0.375	1	0.933	0.833	0.625	0.5	0.8	1	0.875
Costa Rica	CRI	2016	100	72.1333	73.9813	64.0667	50	72.0362	1	1	0.164	1	0.735333	0.668	0.9375	0.771	0.666667	0.668	1	0.228	-99	0.5	-99	1	1	1	1	1	1	0.42	0.021	0	0.379	0	0.164	1	1	0.667	0.95	0.545	0.25	1	0.933	0.75	0.625	0.4	0.8	0.5	0.875
Russian Federation	RUS	2016	80	83.4	55.6625	63.8917	75	71.5908	0.8	1	0.502	1	0.560667	0.513833	0.5835	0.646	0.666667	0.668	1	0.221	-99	0.75	-99	1	1	0	1	1	1	0.404	0.563	0.234	0.808	0.503	0.502	1	0.571	0.556	0.762	0.5	0.375	0.6	0.6	0.583	0.5	0.4	0.5	0.5	0.667
Colombia	COL	2016	100	79.6333	81.425	46.8917	50	71.59	1	1	0.389	1	0.8375	0.745833	0.9375	0.8265	0.666667	1	0	0.209	-99	0.5	-99	1	1	1	1	1	1	0.802	0.042	0	0.719	0.38	0.389	1	1	0.889	1	0.636	0.5	1	0.933	0.667	0.625	0.5	1	0.75	0.875
Cyprus	CYP	2016	100	49.1	53.9062	73.7333	80	71.3479	1	1	0.473	0	0.568	0.522167	0.5835	0.4585	0.833333	0.934	1	0.182	-99	0.8	-99	1	1	1	1	1	1	0.823	0.068	0	0.632	0.844	0.473	0	0.571	0.6	0.762	0.5	0.375	0.6	0.8	0.5	0.5	0.333	0.5	0.5	0.667
Moldova	MDA	2016	100	54.9333	59.4125	56.7167	85	71.2125	1	1	0.648	0	0.7365	0.4265	0.4445	0.8195	0.666667	0.466	1	0.136	-99	0.85	-99	1	1	1	1	1	1	1	0.905	0.452	0.884	0	0.648	0	0.571	0.875	0.857	0.545	0.571	1	0.6	0.417	0.625	0.5	0.167	0.25	0.889
Sri Lanka	LKA	2016	100	81.2667	71.0375	67.8	35	71.0208	1	1	0.438	1	0.732	0.609	0.9445	0.7155	1	0.6	1	0.112	-99	0.35	-99	1	1	1	1	1	1	0.407	0.976	0.341	0.467	0	0.438	1	0.857	1	0.905	0.455	0.375	0.8	0.8	0.462	0.625	0.6	0.667	0.5	0.889
Kazakhstan	KAZ	2016	100	45.7333	71.5563	67.7417	70	71.0062	1	1	0.372	0	0.745667	0.637	0.6945	0.882	0.666667	0.6	1	0.443	-99	0.7	-99	1	1	1	1	1	1	0.62	0.452	0.09	0.701	0	0.372	0	0.857	0.667	0.905	0.545	0.5	1	0.933	0.583	0.556	0.5	0.5	0.75	0.889
Ecuador	ECU	2016	100	86.4667	72.0563	45.8417	50	70.8729	1	1	0.594	1	0.768667	0.695833	0.6875	0.6835	0.666667	0.8	0	0.367	-99	0.5	-99	1	1	1	1	1	1	0.829	0.695	0.121	0.695	0.633	0.594	1	0.857	0.889	0.95	0.545	0.571	0.8	0.933	0.667	0.625	0.4	0.8	0.75	0.875
Iceland	ISL	2016	80	49.5667	54.75	62.8917	100	69.4417	0.8	1	0.487	0	0.5325	0.605667	0.4375	0.528	0.666667	0.8	1	0.049	1	1	1	1	0	1	1	1	1	0.771	0.771	0.386	0.505	0	0.487	0	0.571	0.6	0.81	0.364	0.25	0.6	0.8	0.667	0.75	0.5	0.167	0.75	0.875
Serbia	SRB	2016	100	52.3667	67.5125	60.1917	65	69.0142	1	0	0.571	1	0.7975	0.523167	0.6945	0.7445	0.666667	0.6	1	0.141	-99	0.65	-99	1	1	1	1	1	0	0.619	0.857	0	0.727	0.653	0.571	1	0.857	0.9	0.857	0.6	0.571	1	0.6	0.583	0.556	0.4	0.5	0.5	0.889
Luxembourg	LUX	2016	80	49.0667	53.8875	60.5167	100	68.6942	0.8	1	0.472	0	0.572167	0.58	0.389	0.4655	0.666667	0.666	1	0.088	1	1	1	1	0	1	1	1	1	0.241	0.802	0.131	0.404	0.782	0.472	0	0.571	0.6	0.762	0.4	0.5	0.6	0.8	0.667	0.667	0.429	0.167	0.75	0.778
Indonesia	IDN	2016	100	76.9	67.5812	43.3417	55	68.5646	1	1	0.307	1	0.696167	0.656833	0.6945	0.653	0.666667	0.734	0	0.333	-99	0.55	-99	1	1	1	1	1	1	0.844	0.114	0.068	0.468	0.042	0.307	1	0.857	0.889	0.8	0.545	0.286	0.8	0.933	0.583	0.625	0.5	0.8	0.5	0.889
Mongolia	MNG	2016	100	54.4667	73.55	66.1917	45	67.8417	1	0	0.634	1	0.7795	0.61	0.9445	0.771	0.666667	0.6	1	0.381	-99	0.45	-99	1	1	1	1	1	0	0.976	1	0.5	0.694	0	0.634	1	1	0.9	0.857	0.545	0.375	1	0.8	0.583	0.444	0.333	1	0.5	0.889
India	IND	2016	80	85.7333	63.8438	57.35	50	67.3854	0.8	1	0.572	1	0.635333	0.645833	0.4375	0.8265	1	0.866	0	0.428	-99	0.5	-99	0.5	1	1	1	0.5	1	0.979	0.782	0	0.626	0.476	0.572	1	0.286	0.9	0.762	0.364	0.5	1	0.933	0.667	0.625	0.5	0.4	0.75	0.875
Ukraine	UKR	2016	100	43.9	69.6312	53.1917	70	67.3446	1	1	0.317	0	0.708167	0.579167	0.9445	0.764	0.166667	0.734	1	0.227	-99	0.7	-99	1	1	1	1	1	1	0.417	0.455	0.042	0.671	0	0.317	0	1	0.7	0.81	0.364	0.375	1	0.6	0.583	0.625	0.5	0.667	0.5	0.889
Croatia	HRV	2016	90	51.5	48.35	67.3167	75	66.4333	0.9	1	0.545	0	0.535667	0.489667	0.3335	0.4585	0.666667	0.866	1	0.16	-99	0.75	-99	1	1	1	0.5	1	1	0.27	0.976	0.165	0.815	0.5	0.545	0	0.429	0.6	0.81	0.4	0.375	0.6	0.8	0.5	0.571	0.4	0.167	0.5	0.667
Uruguay	URY	2016	100	74.4333	63.0625	68.5	25	66.1992	1	1	0.233	1	0.692333	0.568	0.625	0.639	1	0.6	1	0.14	-99	0.25	-99	1	1	1	1	1	1	0.525	0.25	0	0.392	0	0.233	1	0.714	0.667	0.762	0.636	0.625	0.75	0.8	0.583	0.625	0.4	0.5	0.5	0.75
El Salvador	SLV	2016	90	72.9	74.6813	52.6167	40	66.0396	0.9	1	0.187	1	0.786833	0.679167	0.6945	0.882	0.666667	0.334	1	0.104	-99	0.4	-99	1	1	1	1	0.5	1	0.173	0.412	0	0.349	0	0.187	1	0.857	0.778	0.95	0.636	0.5	1	0.933	0.667	0.625	0.5	0.6	0.75	0.889
Belarus	BLR	2016	90	45.6	66.5312	46.6083	80	65.7479	0.9	1	0.368	0	0.701	0.610167	0.625	0.764	0.333333	0.332	1	0.199	-99	0.8	-99	1	1	1	1	0.5	1	0.182	0.82	0.042	0.796	0	0.368	0	0.714	0.667	0.905	0.545	0.375	1	0.8	0.667	0.444	0.5	0.5	0.75	0.75
Uganda	UGA	2016	100	45.5	70.9313	44.925	65	65.2712	1	0	0.365	1	0.752167	0.6185	0.6875	0.875	1	0.734	0	0.063	-99	0.65	-99	1	1	1	1	1	0	0.238	0.771	0	0.475	0.338	0.365	1	0.857	0.875	0.667	0.364	0.75	1	0.8	0.417	0.444	0.75	0.8	0.5	0.875
Peru	PER	2016	90	76.1333	70.6188	54.4	30	64.2304	0.9	1	0.284	1	0.747	0.65	0.6875	0.771	1	0.934	0	0.242	-99	0.3	-99	1	1	1	1	0.5	1	0.783	0.431	0.021	0.185	0	0.284	1	0.857	0.8	0.905	0.545	0.375	1	0.8	0.75	0.5	0.5	0.6	0.75	0.875
Albania	ALB	2016	100	18.1333	63.1	58.2917	80	63.905	1	0	0.544	0	0.637333	0.577667	0.6945	0.7085	0.666667	0.466	1	0.199	-99	0.8	-99	1	1	1	1	1	0	0.78	0.865	0.425	0.648	0	0.544	0	0.857	0.7	0.762	0.455	0.25	0.8	0.8	0.583	0.333	0.5	0.5	0.75	0.889
Singapore	SGP	2016	100	48.0333	40.9438	50.0333	75	62.8021	1	1	0.441	0	0.4145	0.438833	0.25	0.4655	0.333333	0.668	1	0	1	0.75	1	1	1	1	1	1	1	0.733	0.671	0.346	0.089	0.367	0.441	0	0	0.375	0.762	0.5	0.25	0.6	0.8	0.333	0.5	0.167	0.333	0.5	0.5
Malaysia	MYS	2016	86.6	46.2333	72.9188	58.4667	45	61.8438	0.866	1	0.387	0	0.725333	0.668167	0.9445	0.7085	0.666667	0.466	1	0.206	-99	0.45	-99	1	1	0.33	1	1	1	0.617	0.436	0.14	0.383	0.36	0.387	0	1	0.9	0.857	0.545	0.25	0.8	0.8	0.667	0.625	0.75	0.667	0.5	0.889
North Macedonia	MKD	2016	100	52.4667	51.3188	59.25	45	61.6071	1	1	0.574	0	0.627333	0.381833	0.4445	0.6335	0.5	0.734	1	0.136	-99	0.45	-99	1	1	1	1	1	1	0.79	0.955	0.341	0.782	0	0.574	0	0.571	0.556	0.762	0.5	0.375	1	0.6	0.385	0.556	0.333	0.167	0.25	0.889
Tanzania	TZA	2016	90	41.8	75.1125	45.9667	55	61.5758	0.9	0	0.254	1	0.739667	0.675333	0.9445	0.8195	0.666667	0.934	0	0.238	-99	0.55	-99	0.5	1	1	1	1	0	0.149	0.741	0	0.377	0	0.254	1	0.857	0.8	0.667	0.364	0.75	1	0.8	0.538	0.714	0.5	1	0.5	0.889
Tunisia	TUN	2016	90	82.9	62.9875	51.9833	20	61.5742	0.9	1	0.487	1	0.695	0.5625	0.6945	0.572	0.333333	0.6	1	0.146	-99	0.2	-99	0.5	1	1	1	1	1	0.896	0.893	0.458	0.188	0	0.487	1	0.857	0.889	0.81	0.364	0.25	1	0.8	0.25	0.625	0.6	0.6	0.5	0.889
Argentina	ARG	2016	50	75.6	79.825	66.8667	35	61.4583	0.5	1	0.268	1	0.758667	0.795833	0.9445	0.778	0.666667	0.732	1	0.276	-99	0.35	-99	0	1	0	0.5	1	1	0.777	0	0	0.561	0	0.268	1	1	0.7	0.95	0.727	0.375	0.8	1	0.75	0.625	0.4	1	1	0.889
Vietnam	VNM	2016	100	45.5667	56.625	74.7	25	60.3783	1	0	0.367	1	0.649333	0.518	0.4445	0.5835	1	0.8	1	0.188	-99	0.25	-99	1	1	1	1	1	0	0.453	0.777	0.277	0.329	0	0.367	1	0.571	0.8	0.714	0.636	0.375	0.8	0.8	0.583	0.625	0.4	0.2	0.5	0.889
Dominican Republic	DOM	2016	100	48.6667	65.875	26.4833	60	60.205	1	0	0.46	1	0.750167	0.545833	0.4445	0.9375	0.333333	0.6	0	0.126	-99	0.6	-99	1	1	1	1	1	0	0.912	0.729	0.048	0.167	0.443	0.46	1	0.571	0.778	1	0.727	0.625	0.8	0.933	0.667	0.375	0.6	0.2	0.5	0.889
Rwanda	RWA	2016	90	56.0333	66.2313	48.35	40	60.1229	0.9	0	0.681	1	0.725333	0.6	0.6945	0.628	1	0.934	0	0	-99	0.4	-99	1	1	1	1	0.5	0	0.261	0.979	0.264	0.901	1	0.681	1	0.857	0.778	0.762	0.455	0.5	1	0.8	0.417	0.333	0.75	0.8	0.5	0.889
Guatemala	GTM	2016	90	42.1333	77.125	60.825	25	59.0167	0.9	0	0.264	1	0.7955	0.670833	0.9445	0.8265	0.5	0.734	1	0.199	-99	0.25	-99	0.5	1	1	1	1	0	0.408	0.483	0.042	0.386	0	0.264	1	1	0.778	0.9	0.545	0.75	0.8	0.933	0.667	0.625	0.5	0.8	0.5	0.889
Jordan	JOR	2016	80	80.1	64.5125	48.8	20	58.6825	0.8	1	0.403	1	0.659667	0.572167	0.6945	0.771	0.5	0.6	0.5	0.352	-99	0.2	-99	0	1	1	1	1	1	0.564	0.836	0.325	0.218	0.071	0.403	1	0.429	0.889	0.81	0.455	0.375	1	0.933	0.5	0.5	0.4	0.6	0.5	0.889
Honduras	HND	2016	90	41.0667	74.6063	45.3833	40	58.2112	0.9	0	0.232	1	0.756667	0.709667	0.6875	0.882	0.333333	0.734	0.5	0.248	-99	0.4	-99	1	1	1	1	0.5	0	0.769	0.273	0.021	0.099	0	0.232	1	0.571	0.667	0.95	0.727	0.625	1	0.933	0.75	0.625	0.4	0.8	0.75	0.875
Morocco	MAR	2016	90	73.6	62.25	32.575	30	57.685	0.9	1	0.208	1	0.6655	0.508333	0.6875	0.771	0.5	0.6	0	0.203	-99	0.3	-99	0.5	1	1	1	1	1	0.099	0.723	0	0.215	0	0.208	1	0.714	0.667	0.762	0.6	0.25	1	0.8	0.25	0.5	0.4	0.6	0.5	0.875
Bolivia	BOL	2016	100	46.2667	70.8875	55.0667	15	57.4442	1	0	0.388	1	0.789	0.644333	0.6875	0.6835	0.666667	0.668	0.5	0.368	-99	0.15	-99	1	1	1	1	1	0	0.661	0.802	0.389	0.09	0	0.388	1	0.857	0.9	0.95	0.727	0.5	0.8	0.933	0.75	0.333	0.5	0.6	0.75	0.875
Montenegro	MNE	2016	90	44.7	59.9	60.0667	30	56.9333	0.9	0	0.341	1	0.638	0.498167	0.6945	0.689	0.666667	0.6	1	0.136	-99	0.3	-99	1	1	1	0.5	1	0	0.715	0.183	0	0.737	0.071	0.341	1	0.857	0.9	0.857	0.364	0.25	0.6	0.6	0.583	0.556	0.5	0.5	0.25	0.889
Ghana	GHA	2016	100	40.2333	66.2125	32.75	45	56.8392	1	0	0.207	1	0.693	0.631833	0.6945	0.628	0.5	0.534	0	0.276	-99	0.45	-99	1	1	1	1	1	0	0.048	0.758	0	0.23	0	0.207	1	0.857	0.667	0.714	0.545	0.375	1	0.933	0.583	0.375	0.6	0.8	0.5	0.889
Bangladesh	BGD	2016	83.4	43.0333	72.2125	50.4417	35	56.8175	0.834	0	0.291	1	0.749667	0.6875	0.6945	0.771	0.666667	0.666	0.5	0.185	-99	0.35	-99	0.5	1	0.67	1	1	0	0.063	0.867	0.021	0.461	0.045	0.291	1	0.714	0.889	0.85	0.545	0.5	1	0.933	0.667	0.375	0.6	0.8	0.75	0.889
Cambodia	KHM	2016	80	40.1333	71.8063	50.375	40	56.4629	0.8	0	0.204	1	0.763833	0.6625	0.6945	0.771	1	0.734	0	0.281	-99	0.4	-99	0	1	1	1	1	0	0.257	0.526	0.021	0.215	0	0.204	1	0.714	0.667	0.85	0.727	0.625	1	0.933	0.667	0.625	0.4	0.6	0.75	0.889
Pakistan	PAK	2016	100	43.0667	64.75	38.45	35	56.2533	1	0	0.292	1	0.702167	0.619	0.6945	0.522	0.5	0.6	0	0.438	-99	0.35	-99	1	1	1	1	1	0	0	0.85	0	0.61	0	0.292	1	0.857	0.889	0.762	0.455	0.25	1	0.8	0.5	0.714	0.6	0.6	0.5	0.889
Kenya	KEN	2016	80	49.8667	68.775	35.9417	45	55.9167	0.8	0	0.496	1	0.7585	0.55	0.6945	0.882	0.666667	0.534	0	0.237	-99	0.45	-99	0.5	1	1	1	0.5	0	0.332	0.91	0.308	0.467	0.467	0.496	1	0.857	0.9	0.714	0.455	0.625	1	0.933	0.417	0.25	0.4	0.8	0.5	0.889
Bosnia and Herzegovina	BIH	2016	90	10.7333	59.4688	48.3333	65	54.7071	0.9	0	0.322	0	0.623667	0.559333	0.4445	0.764	0.333333	0.6	1	0	-99	0.65	-99	0.5	1	1	1	1	0	0.1	0.757	0.024	0.728	0	0.322	0	0.429	0.778	0.905	0.455	0.375	0.8	0.8	0.583	0.556	0.5	0.167	0.75	0.889
Fiji	FJI	2016	90	40.8333	59.7563	51.8417	30	54.4862	0.9	0	0.225	1	0.6235	0.5	0.6945	0.7155	0.666667	0.334	1	0.073	-99	0.3	-99	0.5	1	1	1	1	0	0.167	0.724	0	0.171	0.063	0.225	1	0.857	0.444	0.81	0.455	0.375	0.8	0.933	0.417	0.25	0.4	0.5	0.5	0.889
Zambia	ZMB	2016	90	39.5	67.6875	34.8833	40	54.4142	0.9	0	0.185	1	0.671833	0.619333	0.9445	0.597	0.333333	0.734	0	0.328	-99	0.4	-99	0.5	1	1	1	1	0	0	0.615	0	0.308	0	0.185	1	1	0.875	0.667	0.364	0.375	0.75	0.8	0.333	0.333	0.75	1	0.5	0.889
Paraguay	PRY	2016	70	43.1667	68.5187	45.1	45	54.3571	0.7	0	0.295	1	0.779333	0.559333	0.6945	0.771	1	0.668	0	0.136	-99	0.45	-99	1	0	1	1	0.5	0	0.021	0.85	0	0.179	0.425	0.295	1	0.857	0.778	0.905	0.636	0.5	1	0.8	0.5	0.556	0.5	0.5	0.5	0.889
Malawi	MWI	2016	90	46.3667	72.2875	40.3417	20	53.7992	0.9	0	0.391	1	0.764	0.554833	0.9445	0.882	0.666667	0.734	0	0.213	-99	0.2	-99	0.5	1	1	1	1	0	0.284	0.804	0.198	0.257	0.412	0.391	1	1	0.9	0.714	0.545	0.625	0.8	0.933	0.385	0.111	0.6	0.8	0.5	0.889
Azerbaijan	AZE	2016	80	13.7333	59.8188	55.4417	60	53.7987	0.8	0	0.412	0	0.676833	0.513167	0.4445	0.771	0.666667	0.4	1	0.151	-99	0.6	-99	0	1	1	1	1	0	0.869	0.414	0	0.776	0	0.412	0	0.429	0.889	0.857	0.6	0.286	1	0.8	0.462	0.5	0.4	0.167	0.75	0.889
China	CHN	2016	83.4	48.5333	58.9062	32.3417	45	53.6362	0.834	1	0.456	0	0.592167	0.566667	0.6945	0.5415	0.666667	0.4	0	0.227	-99	0.45	-99	1	1	0.67	1	0.5	1	0	0.958	0	0.844	0.479	0.456	0	0.714	0.8	0.75	0.364	0.125	0.8	0.8	0.25	0.5	0.6	0.5	0.75	0.889
Niger	NER	2016	100	42.3333	67.9062	32.9	25	53.6279	1	0	0.27	1	0.722833	0.545333	0.9445	0.6835	0.5	0.6	0	0.216	-99	0.25	-99	1	1	1	1	1	0	0.021	0.777	0.021	0.508	0.021	0.27	1	1	0.778	0.714	0.545	0.5	0.8	0.8	0.417	0.222	0.333	1	0.5	0.889
Senegal	SEN	2016	90	45.8333	62.7125	36.8167	30	53.0725	0.9	0	0.375	1	0.633833	0.584667	0.6945	0.667	0.666667	0.666	0	0.14	-99	0.3	-99	0.5	1	1	1	1	0	0.095	0.733	0.048	0.456	0.543	0.375	1	0.571	0.8	0.762	0.545	0.375	0.75	0.8	0.583	0.625	0.4	0.6	0.5	0.889
Cameroon	CMR	2016	80	47.4333	69.375	33.175	35	52.9967	0.8	0	0.423	1	0.7245	0.620833	0.6945	0.8195	0.5	0.6	0	0.227	-99	0.35	-99	0.5	1	1	1	0.5	0	0.317	0.843	0.293	0.389	0.273	0.423	1	0.857	0.667	0.762	0.636	0.625	0.8	0.933	0.667	0.375	0.4	0.6	0.75	0.889
Samoa	WSM	2016	90	44.4	56.9375	27.8417	45	52.8358	0.9	0	0.332	1	0.589167	0.477833	0.6945	0.6595	0.666667	0.398	0	0.049	-99	0.45	-99	0.5	1	1	1	1	0	0.211	0.933	0	0.383	0.134	0.332	1	0.571	0.667	0.667	0.455	0.375	0.8	0.8	0.417	0.25	0.4	0.5	0.5	0.889
Cabo Verde	CPV	2016	80	45.2333	59.2625	53.8667	25	52.6725	0.8	0	0.357	1	0.577167	0.570333	0.6945	0.604	0.666667	0.4	1	0.088	-99	0.25	-99	0	1	1	1	1	0	0.588	0.592	0.483	0.123	0	0.357	1	0.857	0.444	0.857	0.455	0.25	0.6	0.8	0.333	0.222	0.4	0.667	1	0.889
Nigeria	NGA	2016	80	45.9	53.8687	39.1667	40	51.7871	0.8	0	0.377	1	0.595167	0.482	0.4445	0.6335	0.666667	0.6	0	0.3	-99	0.4	-99	0	1	1	1	1	0	0.211	0.795	0.116	0.376	0.386	0.377	1	0.286	0.889	0.714	0.182	0.5	1	0.8	0.417	0.375	0.4	0.4	0.5	0.889
Togo	TGO	2016	90	45.3	67.85	30.3917	25	51.7083	0.9	0	0.359	1	0.664333	0.631167	0.9445	0.597	0.666667	0.4	0	0.149	-99	0.25	-99	1	1	1	1	0.5	0	0.293	0.771	0.293	0.29	0.148	0.359	1	0.857	0.889	0.667	0.273	0.5	0.8	0.8	0.462	0.625	0.6	0.8	0.5	0.889
St. Lucia	LCA	2016	80	40.5333	56.875	55.9917	25	51.68	0.8	0	0.216	1	0.551833	0.476333	0.6945	0.771	0.666667	0.534	1	0.039	-99	0.25	-99	0	1	1	1	1	0	0.024	0.651	0	0.065	0.337	0.216	1	0.571	0.625	0.81	0.455	0.25	0.6	0.8	0.25	0.125	0.333	0.6	0.75	0.889
United Arab Emirates	ARE	2016	100	10.6333	38.45	51.1167	55	51.04	1	0	0.319	0	0.417667	0.399333	0.222	0.403	0.666667	0.066	1	0.312	-99	0.55	-99	1	1	1	1	1	0	0.646	0.435	0	0.124	0.392	0.319	0	0.286	0.444	0.762	0.364	0.25	0.4	0.8	0.167	0.429	0.333	0.167	0.5	0.444
Ethiopia	ETH	2016	90	40.4	70.2687	38.4083	15	50.8154	0.9	0	0.212	1	0.808167	0.595667	0.6945	0.7155	0.333333	1	0	0.203	-99	0.15	-99	0.5	1	1	1	1	0	0.068	0.627	0.045	0.321	0	0.212	1	0.857	0.9	0.762	0.455	0.875	1	0.933	0.385	0.556	0.6	0.6	0.5	0.889
Jamaica	JAM	2016	80	5.86667	62.4188	60.1917	45	50.6954	0.8	0	0.176	0	0.607833	0.568167	0.6945	0.771	0.666667	0.6	1	0.141	-99	0.45	-99	0	1	1	1	1	0	0.095	0.424	0	0.361	0	0.176	0	0.714	0.778	0.85	0.455	0.25	0.6	0.867	0.417	0.375	0.4	0.6	0.75	0.889
Kuwait	KWT	2016	100	12.3667	49.2	60.3	30	50.3733	1	0	0.371	0	0.493	0.493	0.5	0.478	0.5	0.8	1	0.112	-99	0.3	-99	1	1	1	1	1	0	0.669	0.742	0.095	0.349	0	0.371	0	0.286	0.667	0.8	0.455	0.25	0.5	1	0.25	0.375	0.333	0.5	0.5	0.5
Cote d'Ivoire	CIV	2016	90	41.5667	71.975	33.2417	15	50.3567	0.9	0	0.247	1	0.812333	0.6	0.6945	0.8265	0.666667	0.6	0	0.063	-99	0.15	-99	0.5	1	1	1	1	0	0.024	0.686	0	0.525	0	0.247	1	0.857	0.778	0.762	0.727	0.75	1	0.933	0.667	0.5	0.4	0.6	0.5	0.889
Tajikistan	TJK	2016	90	12.6	56.0562	42.4417	50	50.2196	0.9	0	0.378	0	0.612	0.460667	0.6945	0.572	0.666667	0.468	0.5	0.063	-99	0.5	-99	0.5	1	1	1	1	0	0.593	0.385	0	0.446	0.467	0.378	0	0.714	0.625	0.81	0.273	0.25	1	0.8	0.231	0.333	0.4	0.5	0.5	0.889
Burundi	BDI	2016	80	44.3667	68.6	22.7083	35	50.135	0.8	0	0.331	1	0.678833	0.628667	0.9375	0.628	0.333333	0.4	0	0.175	-99	0.35	-99	0.5	1	1	1	0.5	0	0	0.838	0	0.817	0	0.331	1	1	0.778	0.7	0.545	0.25	0.8	0.933	0.667	0.222	0.4	0.8	0.75	0.875
Mozambique	MOZ	2016	80	42.1667	63.2938	29.5667	35	50.0054	0.8	0	0.265	1	0.6725	0.543	0.6945	0.7225	0.666667	0.334	0	0.182	-99	0.35	-99	0.5	1	1	1	0.5	0	0.572	0.48	0.273	0	0	0.265	1	0.857	0.8	0.714	0.364	0.5	0.8	0.8	0.333	0.625	0.4	0.6	0.5	0.889
Panama	PAN	2016	80	13.3667	68.8625	62.4417	25	49.9342	0.8	0	0.401	0	0.7275	0.645833	0.6945	0.6945	0.666667	0.466	1	0.365	-99	0.25	-99	1	0	1	1	1	0	0.682	0.802	0	0.521	0	0.401	0	0.857	0.667	0.905	0.636	0.5	0.8	0.8	0.75	0.625	0.4	0.8	0.5	0.889
Qatar	QAT	2016	100	9.3	48.3813	60.5667	30	49.6496	1	0	0.279	0	0.4835	0.480667	0.5	0.478	0.666667	0.668	1	0.088	-99	0.3	-99	1	1	1	1	1	0	0	0.933	0	0.46	0	0.279	0	0.286	0.25	0.81	0.455	0.5	0.6	0.8	0.25	0.5	0.167	0.667	0.5	0.5
Maldives	MDV	2016	70	42.5	48.9625	51.3333	35	49.5592	0.7	0	0.275	1	0.5585	0.45	0.375	0.5165	0.333333	0.402	1	0.318	-99	0.35	-99	0	1	1	1	0.5	0	0.586	0.696	0.042	0.054	0	0.275	1	0.571	0.375	0.81	0.545	0.25	0.8	0.8	0.417	0.25	0.4	0.333	0.5	0.75
Namibia	NAM	2016	70	43.3	70.9437	33.4417	30	49.5371	0.7	0	0.299	1	0.659333	0.665333	0.9375	0.764	0.666667	0.468	0	0.203	-99	0.3	-99	0.5	1	0	1	1	0	0.19	0.868	0	0.436	0	0.299	1	0.714	0.9	0.762	0.455	0.625	0.5	0.8	0.417	0.625	0.6	0.8	0.75	0.875
Nepal	NPL	2016	70	42.7667	67.9	41.575	25	49.4483	0.7	0	0.283	1	0.711167	0.509167	0.9445	0.8265	1	0.6	0	0.063	-99	0.25	-99	0	1	1	1	0.5	0	0.024	0.843	0	0.546	0	0.283	1	0.571	0.889	0.762	0.545	0.5	1	0.8	0.333	0.222	0.4	0.8	0.5	0.889
Burkina Faso	BFA	2016	70	42.0333	65.8375	42.7667	25	49.1275	0.7	0	0.261	1	0.649833	0.594333	0.9375	0.597	0.666667	0.666	0	0.378	-99	0.25	-99	0	1	1	1	0.5	0	0	0.846	0	0.457	0	0.261	1	1	0.667	0.762	0.545	0.125	0.8	0.933	0.417	0.333	0.333	0.8	0.75	0.875
Lesotho	LSO	2016	80	43.6333	50.0688	36.4917	35	49.0388	0.8	0	0.309	1	0.5125	0.436	0.4445	0.7155	0.666667	0.668	0	0.125	-99	0.35	-99	0	1	1	1	1	0	0.149	0.75	0.102	0.545	0	0.309	1	0.286	0.667	0.667	0.455	0.25	0.75	0.933	0.25	0.333	0.4	0.2	0.5	0.889
Oman	OMN	2016	100	17	43.3	49.25	35	48.91	1	0	0.51	0	0.531167	0.371667	0.3335	0.422	1	0.334	0.5	0.136	-99	0.35	-99	1	1	1	1	1	0	0.664	0.706	0.344	0.17	0.664	0.51	0	0	0.7	0.857	0.455	0.375	0.8	0.8	0.167	0.429	0.167	0.167	0.5	0.667
Mali	MLI	2016	80	48.9333	59.4562	37.5333	15	48.1846	0.8	0	0.468	1	0.613333	0.574	0.639	0.5555	0.333333	0.868	0	0.3	-99	0.15	-99	0	1	1	1	1	0	0.414	0.8	0.319	0.393	0.414	0.468	1	0.571	0.8	0.714	0.545	0.25	0.8	0.8	0.5	0.444	0.4	0.8	0.5	0.778
Belize	BLZ	2016	80	9.7	56.1875	62.6917	30	47.7158	0.8	0	0.291	0	0.537667	0.5555	0.4445	0.771	0.666667	0.666	1	0.175	-99	0.3	-99	0	1	1	1	1	0	0.465	0.73	0	0.258	0	0.291	0	0.143	0.667	0.905	0.636	0.375	0.5	0.933	0.667	0.25	0.333	0.4	0.75	0.889
Bhutan	BTN	2016	70	48.1333	62.3312	35.375	20	47.1679	0.7	0	0.444	1	0.678	0.553667	0.6945	0.597	0.5	0.534	0	0.381	-99	0.2	-99	0.5	0	1	1	1	0	0.12	1	0.12	0.563	0.419	0.444	1	0.857	0.667	0.714	0.455	0.375	1	0.933	0.417	0.222	0.333	0.667	0.75	0.889
Saudi Arabia	SAU	2016	80	7.63333	44.5187	69.675	30	46.3654	0.8	0	0.229	0	0.360167	0.5215	0.5835	0.333	1	0.534	1	0.253	-99	0.3	-99	1	0	1	1	1	0	0.418	0.293	0.212	0.221	0	0.229	0	0.143	0.333	0.762	0.273	0.25	0.4	0.8	0.333	0.429	0.4	0.667	0.5	0.667
Sao Tome and Principe	STP	2016	60	45.7667	46.825	48.3167	30	46.1817	0.6	0	0.373	1	0.496333	0.365667	0.4445	0.7155	0.666667	0.266	1	0	-99	0.3	-99	0	1	1	1	0	0	0.55	0.526	0.287	0	0.502	0.373	1	0.286	0.5	0.762	0.455	0.375	0.6	0.8	0.25	0.111	0.333	0.2	0.5	0.889
Benin	BEN	2016	80	40.5667	53.8687	36.3667	20	46.1604	0.8	0	0.217	1	0.603167	0.494333	0.389	0.628	0.666667	0.6	0	0.188	-99	0.2	-99	1	1	1	1	0	0	0.205	0.602	0	0.224	0.054	0.217	1	0.429	0.667	0.762	0.636	0.375	0.75	0.933	0.333	0.25	0.5	0.2	0.75	0.778
Botswana	BWA	2016	46.6	43.5333	62.2563	47.2167	30	45.9213	0.466	0	0.306	1	0.617167	0.610167	0.6945	0.604	0.666667	0.534	0.5	0.188	-99	0.3	-99	0.5	0	0.33	1	0.5	0	0	0.8	0	0.332	0.397	0.306	1	0.571	0.7	0.762	0.545	0.125	1	0.8	0.417	0.444	0.75	0.5	0.75	0.889
Iran, Islamic Rep.	IRN	2016	80	8.43333	51.2188	58.7417	30	45.6788	0.8	0	0.253	0	0.563667	0.481833	0.4445	0.5165	0.666667	0.4	1	0.283	-99	0.3	-99	1	0	1	1	1	0	0.426	0	0	0.837	0	0.253	0	0.286	0.444	0.857	0.545	0.25	1	0.933	0.333	0.625	0.333	0.167	0.5	0.889
Venezuela, RB	VEN	2016	60	41.4333	55.55	43.9667	25	45.19	0.6	0	0.243	1	0.5295	0.527667	0.6945	0.578	0.666667	0.334	0.5	0.258	-99	0.25	-99	0	1	0	1	1	0	0.435	0.286	0.033	0.458	0	0.243	1	0.714	0.444	0.714	0.455	0.25	0.6	0.8	0.308	0.625	0.333	0.6	0.5	0.889
Nicaragua	NIC	2016	90	12.7	66.9313	26.275	30	45.1812	0.9	0	0.381	0	0.666333	0.613833	0.6875	0.8265	0.5	0.4	0	0.151	-99	0.3	-99	0.5	1	1	1	1	0	0.286	0.742	0	0.508	0.371	0.381	0	0.857	0.667	0.81	0.364	0.5	0.8	0.8	0.583	0.5	0.5	0.8	0.5	0.875
Sierra Leone	SLE	2016	80	42.3	57.8312	20.3417	25	45.0946	0.8	0	0.269	1	0.630833	0.489167	0.6945	0.572	0.166667	0.4	0	0.247	-99	0.25	-99	0	1	1	1	1	0	0	0.8	0	0.543	0	0.269	1	0.429	0.778	0.714	0.364	0.5	1	0.8	0.385	0.25	0.4	0.6	0.5	0.889
Bahrain	BHR	2016	90	14.2667	39.3937	39.7833	40	44.6887	0.9	0	0.428	0	0.3925	0.469167	0.25	0.3165	0.333333	0.132	1	0.126	-99	0.4	-99	1	1	1	1	0.5	0	0.604	0.783	0.314	0.439	0	0.428	0	0	0.375	0.8	0.455	0.125	0.6	1	0.231	0.5	0.167	0.167	0.75	0.5
Lao PDR	LAO	2016	70	42.4333	58.8188	42.1083	10	44.6721	0.7	0	0.273	1	0.6765	0.440667	0.6945	0.6595	0.833333	0.6	0	0.251	-99	0.1	-99	0.5	1	1	1	0	0	0.021	0.663	0.054	0.317	0.308	0.273	1	0.714	0.625	0.8	0.545	0.375	1	0.933	0.167	0.111	0.333	0.6	0.5	0.889
Liberia	LBR	2016	90	12.4333	60.5063	35.0917	25	44.6063	0.9	0	0.373	0	0.660167	0.529167	0.6945	0.578	0.666667	0.534	0	0.203	-99	0.25	-99	1	1	1	1	0.5	0	0.451	0.758	0.472	0.185	0	0.373	0	0.714	0.778	0.714	0.455	0.5	0.8	0.933	0.417	0.125	0.4	0.8	0.5	0.889
Angola	AGO	2016	70	7.66667	70.4437	30.5667	40	43.7354	0.7	0	0.23	0	0.675167	0.65	0.9445	0.7155	0.666667	0.468	0	0.088	-99	0.4	-99	0	1	1	1	0.5	0	0.078	0.615	0.078	0.376	0	0.23	0	0.714	0.778	0.714	0.545	0.5	0.8	0.933	0.417	0.5	0.5	0.8	0.75	0.889
Myanmar	MMR	2016	66.6	11.9333	71.95	36.6167	30	43.42	0.666	0	0.358	0	0.746833	0.579167	0.9445	0.8335	0.666667	0.532	0	0.266	-99	0.3	-99	0	1	0.33	1	1	0	0.452	0.646	0.248	0.443	0	0.358	0	1	0.889	0.762	0.455	0.625	0.75	0.8	0.667	0.375	0.333	0.8	0.5	0.889
Congo, Rep.	COG	2016	90	8.7	52.3937	32.2667	30	42.6721	0.9	0	0.261	0	0.624333	0.444667	0.4445	0.54	0.666667	0.334	0	0.29	-99	0.3	-99	0.5	1	1	1	1	0	0	0.777	0	0.527	0	0.261	0	0.286	0.778	0.762	0.545	0.375	1	0.933	0.385	0.25	0.4	0.2	0.5	0.889
Zimbabwe	ZWE	2016	80	7.5	50.9813	39.7417	35	42.6446	0.8	0	0.225	0	0.53	0.507333	0.4445	0.522	0.666667	0.668	0	0.255	-99	0.35	-99	0	1	1	1	1	0	0	0.771	0	0.329	0.024	0.225	0	0.143	0.75	0.714	0.273	0.5	0.8	0.8	0.5	0.444	0.4	0.4	0.5	0.889
Gambia, The	GMB	2016	60	38.4	59.7437	29.9667	25	42.6221	0.6	0	0.152	1	0.684667	0.528	0.625	0.5165	0.666667	0.532	0	0	-99	0.25	-99	0	1	1	1	0	0	0	0.46	0	0.298	0	0.152	1	0.857	0.625	0.762	0.364	0.5	1	0.933	0.385	0.25	0.5	0.6	0.5	0.75
Eswatini	SWZ	2016	90	2	67.3563	18.3333	35	42.5379	0.9	0	0.06	0	0.680833	0.5935	0.9375	0.628	0.333333	0.4	0	0	-99	0.35	-99	0.5	1	1	1	1	0	0	0.137	0	0.137	0.024	0.06	0	0.714	0.889	0.762	0.545	0.375	0.8	0.8	0.417	0.444	0.6	0.8	0.5	0.875
Algeria	DZA	2016	70	6.5	56.3937	49.8917	25	41.5571	0.7	0	0.195	0	0.574667	0.534667	0.4445	0.739	0.666667	0.266	1	0.063	-99	0.25	-99	0	1	1	0.5	1	0	0.054	0.704	0	0.218	0	0.195	0	0.286	0.667	0.85	0.545	0.5	0.6	0.933	0.583	0.375	0.4	0.167	0.75	0.889
Bahamas, The	BHS	2016	100	8.23333	33.8188	24.7333	35	40.3571	1	0	0.247	0	0.274333	0.389	0.25	0.4655	0.333333	0.132	0.5	0.024	-99	0.35	-99	1	1	1	1	1	0	0.024	0.758	0	0.405	0.048	0.247	0	0.143	0.143	0.762	0.273	0.125	0.2	1	0.25	0	0.167	0.167	0.75	0.5
Guinea	GIN	2016	70	47.1	55.8188	21.4083	5	39.8654	0.7	0	0.413	1	0.591833	0.437333	0.6945	0.6835	0.333333	0.268	0	0.255	-99	0.05	-99	0.5	1	1	1	0	0	0.251	0.933	0.251	0.629	0	0.413	1	0.714	0.625	0.667	0.545	0.25	0.75	0.933	0.333	0.125	0.333	0.4	0.5	0.889
Madagascar	MDG	2016	90	1.1	60.7938	13.35	30	39.0487	0.9	0	0.033	0	0.6185	0.572167	0.6945	0.597	0	0.534	0	0	-99	0.3	-99	0.5	1	1	1	1	0	0	0.095	0	0.071	0	0.033	0	0.714	0.778	0.714	0.455	0.25	0.8	0.933	0.5	0.5	0.4	0.6	0.5	0.889
Uzbekistan	UZB	2016	70	4.1	48.3312	31.225	40	38.7313	0.7	0	0.123	0	0.465667	0.476	0.4445	0.597	0	0.2	1	0.049	-99	0.4	-99	0	1	1	1	0.5	0	0	0.25	0	0.214	0.149	0.123	0	0.286	0.5	0.81	0.273	0.125	0.8	0.8	0.333	0.556	0.5	0.167	0.5	0.889
Iraq	IRQ	2016	60	8.86667	55.1625	28.275	40	38.4608	0.6	0	0.266	0	0.537	0.571167	0.6945	0.394	0.5	0.4	0	0.231	-99	0.4	-99	0.5	1	0	1	0.5	0	0.033	0.802	0	0.423	0.071	0.266	0	0.714	0.375	0.81	0.273	0.25	0.8	0.933	0.417	0.444	0.333	0.8	0.5	0.889
Yemen, Rep.	YEM	2016	76.6	8.86667	52.1437	23.7167	30	38.2654	0.766	0	0.266	0	0.5545	0.476667	0.4445	0.6335	0.166667	0.534	0	0.248	-99	0.3	-99	0.5	1	0.33	1	1	0	0.825	0.14	0.117	0.129	0.117	0.266	0	0.429	0.429	0.714	0.455	0.5	0.8	0.8	0.385	0.375	0.4	0.4	0.5	0.889
Vanuatu	VUT	2016	46.6	40.7667	51.6	30.0917	20	37.8117	0.466	0	0.223	1	0.5	0.426833	0.6945	0.653	0.666667	0.334	0	0.203	-99	0.2	-99	0	1	0.33	1	0	0	0	0.758	0	0.358	0	0.223	1	0.429	0.625	0.714	0.182	0.25	0.8	0.8	0.25	0.111	0.4	0.5	0.5	0.889
Afghanistan	AFG	2016	70	6.73333	54.8062	19.575	35	37.2229	0.7	0	0.202	0	0.571667	0.487	0.4445	0.764	0	0.466	0	0.317	-99	0.35	-99	0	1	1	1	0.5	0	0.49	0	0	0.521	0	0.202	0	0.286	0.889	0.8	0.455	0.25	0.75	0.933	0.417	0.222	0.4	0.2	0.75	0.889
Mauritania	MRT	2016	70	10.6	51.7875	21.8833	30	36.8542	0.7	0	0.318	0	0.6305	0.409667	0.4445	0.578	0.333333	0.466	0	0.076	-99	0.3	-99	0.5	0	1	1	1	0	0.104	0.867	0.104	0.412	0.104	0.318	0	0.571	0.778	0.714	0.545	0.375	0.8	0.8	0.5	0.125	0.333	0.2	0.5	0.889
Trinidad and Tobago	TTO	2016	60	5.86667	41.2687	44.9833	30	36.4237	0.6	0	0.176	0	0.339667	0.407	0.5835	0.478	0.333333	0.466	1	0	-99	0.3	-99	0	0	1	1	1	0	0.238	0.321	0.095	0.042	0.185	0.176	0	0.143	0.444	0.619	0.182	0.25	0.4	0.8	0.167	0.375	0.2	0.4	0.5	0.667
Haiti	HTI	2016	90	1.73333	50	19.2	20	36.1867	0.9	0	0.052	0	0.520167	0.491	0.4445	0.522	0.5	0.268	0	0	-99	0.2	-99	1	1	1	1	0.5	0	0	0.143	0	0.119	0	0.052	0	0.571	0.556	0.762	0.182	0.25	0.8	0.933	0.538	0.375	0.4	0.2	0.5	0.889
Suriname	SUR	2016	30	13.5333	42.3813	48.3167	45	35.8462	0.3	0	0.406	0	0.42	0.407	0.4375	0.472	0.666667	0.266	1	0	-99	0.45	-99	0	0	0	0.5	1	0	0.303	0.917	0.207	0.321	0.282	0.406	0	0.143	0.444	0.81	0.273	0.25	0.6	0.8	0.167	0.375	0.4	0.2	0.5	0.875
Guyana	GUY	2016	60	9.9	56.15	16.7333	35	35.5567	0.6	0	0.297	0	0.5885	0.468	0.5835	0.739	0.333333	0.2	0	0.136	-99	0.35	-99	0	1	1	1	0	0	0.063	0.675	0.063	0.371	0.314	0.297	0	0.571	0.75	0.905	0.455	0.25	0.6	0.933	0.25	0.125	0.4	0.6	0.5	0.667
Sudan	SDN	2016	53.4	13.9	62.1938	33.1917	15	35.5371	0.534	0	0.417	0	0.604833	0.502667	0.9445	0.7085	0.666667	0.4	0	0.261	-99	0.15	-99	0	1	0.67	1	0	0	0.483	0	0.298	0.858	0.446	0.417	0	0.714	0.8	0.667	0.273	0.375	0.8	0.8	0.333	0.25	0.333	0.8	0.5	0.889
St. Vincent and the Grenadines	VCT	2016	40	5.8	49.9937	41.7833	40	35.5154	0.4	0	0.174	0	0.477667	0.404167	0.6945	0.6595	0.333333	0.132	1	0.206	-99	0.4	-99	0	1	1	0	0	0	0.071	0.573	0	0.182	0.042	0.174	0	0.571	0.444	0.762	0.364	0.125	0.6	0.8	0.167	0.125	0.333	0.5	0.5	0.889
Solomon Islands	SLB	2016	56.6	7.03333	55.75	22.4833	25	33.3733	0.566	0	0.211	0	0.562167	0.459167	0.6875	0.7085	0.333333	0.266	0	0.3	-99	0.25	-99	0	1	0.33	1	0.5	0	0.063	0.536	0	0.456	0	0.211	0	0.714	0.667	0.762	0.455	0.375	0.4	0.8	0.333	0.222	0.4	0.5	0.5	0.875
Lebanon	LBN	2016	40	8.5	53.2563	48.6583	15	33.0829	0.4	0	0.255	0	0.549667	0.416667	0.6945	0.667	0.333333	0.334	1	0.279	-99	0.15	-99	0	0	1	1	0	0	0.639	0.233	0	0.382	0.024	0.255	0	0.571	0.667	0.571	0.364	0.125	1	0.6	0.25	0.25	0.4	0.5	0.5	0.889
Guinea-Bissau	GNB	2016	46.6	45.4667	43.4625	16.2083	10	32.3475	0.466	0	0.364	1	0.472167	0.387833	0.375	0.522	0.333333	0.266	0	0.049	-99	0.1	-99	0	1	0.33	1	0	0	0.317	0.627	0.317	0.4	0.158	0.364	1	0.143	0.625	0.667	0.273	0.375	0.75	0.933	0.25	0.111	0.333	0.2	0.5	0.75
South Sudan	SSD	2016	20	41.2667	44.075	20.1833	25	30.105	0.2	0	0.238	1	0.428833	0.429167	0.6945	0.2575	0.333333	0.198	0	0.276	-99	0.25	-99	0	0	0	1	0	0	0.335	0.549	0.239	0.068	0	0.238	1	0.571	0.375	0.429	0.273	0.125	0.8	0.8	0.167	0.222	0.286	0.6	0.5	0.889
Chad	TCD	2016	46.6	8.9	51.1063	20.9083	15	28.5029	0.466	0	0.267	0	0.6055	0.449833	0.4445	0.478	0.333333	0.2	0	0.303	-99	0.15	-99	0	1	0.33	1	0	0	0	0.752	0	0.582	0	0.267	0	0.143	0.667	0.762	0.636	0.625	0.8	0.933	0.333	0.333	0.4	0.2	0.5	0.889
Papua New Guinea	PNG	2016	50	4	47.2188	20.3083	15	27.3054	0.5	0	0.12	0	0.396667	0.457	0.6945	0.522	0.333333	0.2	0	0.279	-99	0.15	-99	0	1	1	0.5	0	0	0.048	0.37	0	0.182	0	0.12	0	0.429	0.286	0.667	0.273	0.125	0.6	0.8	0.167	0.375	0.4	0.5	0.5	0.889
Djibouti	DJI	2016	40	8.16667	49.7188	25.2667	5	25.6304	0.4	0	0.245	0	0.531	0.409667	0.5835	0.572	0.666667	0.268	0	0.076	-99	0.05	-99	0	0	1	1	0	0	0.182	0.717	0.182	0.143	0	0.245	0	0.571	0.571	0.714	0.455	0.375	0.5	0.933	0.167	0.125	0.333	0.4	0.5	0.667
Libya	LBY	2016	40	0.333333	36.95	22.4417	20	23.945	0.4	0	0.01	0	0.39	0.35	0.4445	0.2915	0.666667	0.134	0	0.097	-99	0.2	-99	0	0	0	1	1	0	0	0.048	0	0	0	0.01	0	0.143	0.714	0.667	0.091	0.125	0.6	0.6	0.25	0.25	0.333	0.167	0.5	0.889
Gabon	GAB	2016	26.6	6.56667	47.7938	15.0333	20	23.1988	0.266	0	0.197	0	0.493167	0.431833	0.389	0.6595	0.333333	0.132	0	0.136	-99	0.2	-99	0	0	0.33	1	0	0	0	0.58	0	0.406	0	0.197	0	0.143	0.667	0.667	0.182	0.5	0.8	0.933	0.308	0.25	0.4	0.2	0.5	0.778
Kiribati	KIR	2016	20	7.93333	46.1562	16.2083	20	22.0596	0.2	0	0.238	0	0.376	0.466	0.625	0.5415	0.333333	0.266	0	0.049	-99	0.2	-99	0	0	0	1	0	0	0.28	0.644	0	0.265	0	0.238	0	0.286	0.333	0.714	0.273	0.25	0.4	0.933	0.308	0.222	0.333	0.5	0.5	0.75
Micronesia, Fed. Sts.	FSM	2016	20	8.13333	43.9375	20.3583	15	21.4858	0.2	0	0.244	0	0.396833	0.448	0.6875	0.293	0.333333	0.2	0	0.281	-99	0.15	-99	0	0	0	1	0	0	0.242	0.78	0.021	0.176	0	0.244	0	0.571	0.286	0.476	0.273	0.375	0.4	0.8	0.333	0.222	0.333	0.5	0.5	0.875
Turkmenistan	TKM	2016	26.6	6.83333	41.925	17.1083	5	19.4933	0.266	0	0.205	0	0.435	0.3755	0.4445	0.478	0.333333	0.2	0	0.151	-99	0.05	-99	0	0	0.33	1	0	0	0	0.646	0	0.377	0	0.205	0	0.143	0.625	0.81	0.182	0.25	0.6	0.8	0.231	0.222	0.333	0.167	0.5	0.889
Marshall Islands	MHL	2016	10	6.46667	39.5375	11.5583	0	13.5125	0.1	0	0.194	0	0.351667	0.401833	0.625	0.2775	0.333333	0.066	0	0.063	-99	0	-99	0	0	0	0.5	0	0	0	0.652	0	0.317	0	0.194	0	0.429	0.286	0.381	0.364	0.25	0.4	0.8	0.167	0.111	0.333	0.5	0.5	0.75
American Samoa	ASM	2016	30		17.7563				0.3	0			0.105667	0.136167	0.5625	0.1325			1		-99		-99	1	0	0	0.5	0	0								0.143	0	0.091	0	0	0.4	0.4	0	0	0	0.167	0.25	0.625
Andorra	AND	2016	60		26.1062				0.6				0.2485	0.210167	0.3335	0.379		0.4	1		-99		-99	1	1	0	1	0									0.143	0	0.55	0.273	0.125	0.4	0.6	0.077	0	0.167	0.167	0.25	0.667
Antigua and Barbuda	ATG	2016	20		52.0812		25		0.2	0		0	0.457667	0.5655	0.625	0.472	0.666667	0.132	1		-99	0.25	-99	0	0	1	0	0	0							0	0.571	0.286	0.8	0.364	0.125	0.6	1	0.25	0.143	0.333	0.667	1	0.75
Aruba	ABW	2016	60		18.375				0.6	0			0.138667	0.188833	0.25	0.2375			1		-99		-99	1	0	1	1	0	0								0.143	0.125	0.091	0.273	0	0.2	0.8	0.083	0	0	0	0.25	0.5
Barbados	BRB	2016	80		49.55		25		0.8	0		0	0.4485	0.493167	0.5	0.639	0.333333	0.134	1		-99	0.25	-99	1	0	1	1	1	0							0	0.286	0.375	0.8	0.455	0.375	0.4	1	0.417	0.125	0.167	0.5	0.75	0.5
Bermuda	BMU	2016	60		18.9062				0.6	0			0.166333	0.172	0.25	0.2475			1		-99		-99	1	0	1	1	0	0								0.143	0	0.091	0.364	0	0.4	0.6	0.154	0.111	0	0.167	0	0.5
British Virgin Islands	VGB	2016	40		14.6562				0.4	0			0.1015	0.175667	0.25	0.091			1		-99		-99	1	0	1	0	0	0								0	0	0.045	0.364	0	0.2	0.4	0.154	0	0	0	0.5	0.5
Brunei Darussalam	BRN	2016	100		38.5938		30		1	0		0	0.302333	0.491667	0.3335	0.372	0.333333	0.268	1		-99	0.3	-99	1	1	1	1	1	0							0	0	0.222	0.762	0.455	0.125	0.25	1	0.583	0.25	0.2	0.167	0.75	0.667
Cayman Islands	CYM	2016	40		16.1				0.4	0			0.0711667	0.187833	0.25	0.261			1		-99		-99	1	0	1	0	0	0								0	0	0.045	0.182	0	0.2	0.8	0.077	0	0	0	0.25	0.5
Central African Republic	CAF	2016	20		46.4688		15		0.2	0		0	0.461833	0.429667	0.6945	0.3485	0.166667	0.2	0		-99	0.15	-99	0	0	1	0	0	0							0	0.286	0.625	0.571	0.364	0.125	0.8	0.8	0.167	0.111	0.4	0.6	0.5	0.889
Channel Islands	CHI	2016	60						0.6	0											-99		-99	1	0	1	1	0	0
Comoros	COM	2016	60		54.4937		20		0.6	0		0	0.535333	0.514667	0.6875	0.522	0.166667	0.334	0		-99	0.2	-99	0	0	1	1	1	0							0	0.714	0.429	0.762	0.182	0.625	0.5	0.933	0.5	0.222	0.333	0.6	0.5	0.875
Congo, Dem. Rep.	COD	2016	70		56.6688				0.7		0.2	0	0.652667	0.488	0.4445	0.667		0.532	0	0.285	-99		-99	0.5	1	0	1	1		0	0.638	0	0.361	0	0.2	0	0.571	0.75	0.75	0.545	0.5	0.8	0.933	0.462	0.5	0.333	0.2	0.5	0.889
Cuba	CUB	2016	70		49.4375				0.7	0	0.437		0.525333	0.457833	0.4445	0.561			1	0.238	-99		-99	1	1	0	1	0.5	0	0.446	0.508	0	0.804	0.425	0.437		0.143	0.375	0.95	0.455	0.429	0.8	0.6	0.231	0.5	0.333	0.333	0.75	0.889
Curacao	CUW	2016	40		14.0125				0.4	0			0.0408333	0.219167	0.25	0.091			1		-99		-99	1	0	1	0	0	0								0	0	0.045	0	0	0.2	0.8	0.154	0.111	0	0	0.25	0.5
Dominica	DMA	2016	40		46.25		40		0.4	0		0	0.4255	0.404167	0.639	0.572	0.666667	0.2	1		-99	0.4	-99	0	1	1	0	0	0							0	0.429	0.444	0.5	0.455	0.125	0.6	0.8	0.167	0.125	0.333	0.5	0.5	0.778
Equatorial Guinea	GNQ	2016	20		45.8375		20		0.2	0		0	0.407333	0.463167	0.6945	0.361	0.5	0.132	0		-99	0.2	-99	0	1	0	0	0	0							0	0.429	0.25	0.476	0.364	0.125	0.8	1	0.154	0.125	0.4	0.6	0.5	0.889
Eritrea	ERI	2016	6.6		37.4438		10		0.066	0		0	0.3895	0.373833	0.4445	0.261	0	0	0		-99	0.1	-99	0	0	0.33	0	0	0							0	0	0.429	0.619	0.364	0.125	0.8	0.8	0.154	0.222	0.4	0.167	0.5	0.889
Faroe Islands	FRO	2016	60		9.76875				0.6	0			0.0616667	0.0666667	0.25	0.1465			1		-99		-99	1	0	1	1	0	0								0	0.125	0.045	0	0	0.2	0.4	0	0	0	0	0	0.5
French Polynesia	PYF	2016	70		12.925				0.7	0			0.036	0.1545	0.3125	0.15			1		-99		-99	1	0	1	1	0.5	0								0	0.125	0.091	0	0	0	0.6	0.077	0	0	0	0.25	0.625
Gibraltar	GIB	2016	60		10.9875				0.6	0			0.134833	0.0851667	0.125	0.094			1		-99		-99	1	0	1	1	0	0								0	0	0.045	0.364	0	0.4	0.4	0	0.111	0	0	0	0.25
Greenland	GRL	2016	50		11.1687				0.5	0			0.0818333	0.0795	0.3125	0.097			1		-99		-99	1	0	1	0.5	0	0								0	0	0.091	0	0	0.4	0.4	0.077	0	0	0	0	0.625
Grenada	GRD	2016	30		43.9625		25		0.3	0		0	0.443333	0.390167	0.4445	0.572	0.666667	0.2	1		-99	0.25	-99	0	0	1	0.5	0	0							0	0.143	0.375	0.762	0.455	0.125	0.8	0.8	0.25	0.125	0.333	0.333	0.5	0.889
Guam	GUM	2016	60		13.2438				0.6	0			0.0818333	0.141667	0.25	0.139			1		-99		-99	1	0	1	1	0	0								0	0	0.091	0	0	0.4	0.6	0	0	0	0	0.25	0.5
Hong Kong SAR, China	HKG	2016	80		28.8687				0.8	1	0.279		0.220167	0.288167	0.3125	0.472			1	0.126	-99		-99	1	0	1	1	1	1	0.123	0.865	0	0.373	0.033	0.279		0	0.25	0.091	0.455	0.125	0.4	0.6	0.25	0.429	0.2	0	0.25	0.625
Isle of Man	IMN	2016	40		8.96875				0.4				0.0571667	0.0905	0.125	0.1495			1		-99		-99	1	0	0	1	0									0.143	0	0	0	0	0.2	0.4	0	0	0.143	0	0	0.25
Korea, Dem. People’s Rep.	PRK	2016	20		36.65				0.2	0			0.390167	0.362667	0.4375	0.236			0		-99		-99	1	0	0	0	0	0								0	0.625	0.7	0.091	0.125	0.8	0.8	0.154	0.222	0.333	0.167	0.5	0.875
Kosovo	XKX	2016	20						0.2		0.368	0						0.6		0.063	-99		-99	1	0	0	0	0		0	0.863	0	0.548	0.432	0.368	0
Liechtenstein	LIE	2016	60		23.1625				0.6	0			0.188167	0.2105	0.3335	0.3235			1		-99		-99	1	0	1	1	0	0								0.143	0.143	0.045	0.273	0.125	0.4	0.4	0.077	0	0.286	0	0.5	0.667
Macao SAR, China	MAC	2016	80		22.5938				0.8	0			0.182167	0.198167	0.25	0.4165			1		-99		-99	1	0	1	1	1	0								0.143	0.25	0.045	0.455	0	0.2	0.6	0.167	0.222	0.2	0	0	0.5
Monaco	MCO	2016	60		18.4438				0.6	0			0.182	0.1395	0.1875	0.3235			1		-99		-99	1	0	1	1	0	0								0	0.143	0.333	0.091	0.125	0.4	0.2	0.077	0	0.143	0.167	0.25	0.375
Nauru	NRU	2016	60		34.7437		0		0.6	0		0	0.319167	0.3755	0.375	0.3205	0	0.2	1		-99	0	-99	0	1	1	1	0	0							0	0.143	0.143	0.524	0.455	0.25	0.4	0.8	0.231	0.222	0.333	0.167	0.5	0.75
New Caledonia	NCL	2016	70		14.8438				0.7	0			0.142667	0.121167	0.3125	0.0835			1		-99		-99	1	0	1	1	0.5	0								0.143	0.222	0.091	0	0	0.4	0.4	0.077	0	0	0	0.25	0.625
Northern Mariana Islands	MNP	2016	60		9.1875				0.6	0			0.0818333	0.0333333	0.3125	0.077			1		-99		-99	1	0	1	1	0	0								0	0	0.091	0	0	0.4	0.2	0	0	0	0	0	0.625
Palau	PLW	2016	10		42.7812		15		0.1	0		0	0.381167	0.431	0.625	0.361	0.333333	0.2	1		-99	0.15	-99	0	0	0	0.5	0	0							0	0.429	0.286	0.524	0.273	0.375	0.4	0.8	0.231	0.222	0.333	0.5	0.5	0.75
Puerto Rico	PRI	2016	80		22.2188				0.8	0			0.187833	0.217167	0.3125	0.25			1		-99		-99	1	0	1	1	1	0								0	0.25	0.095	0.182	0	0.6	0.6	0.231	0.222	0	0	0.25	0.625
Romania	ROU	2016	70		57.2687				0.7		0.468	1	0.6125	0.525667	0.5835	0.5835		0.934	1	0.326	-99		-99	1	1	0	0.5	1		0.917	0.024	0.024	0.917	0.458	0.468	1	0.857	0.556	0.762	0.4	0.5	0.6	0.6	0.583	0.571	0.4	0.5	0.5	0.667
San Marino	SMR	2016	60		18.9312		45		0.6	0		0	0.202167	0.158	0.222	0.212			1		-99	0.45	-99	1	0	1	1	0	0							0	0	0.125	0.381	0.182	0.125	0.4	0.2	0.077	0.111	0.143	0.167	0.25	0.444
Seychelles	SYC	2016	40		53.5688		55		0.4	1		0	0.548	0.45	0.6945	0.597	0.666667	0.466	1		-99	0.55	-99	0	0	1	1	0	1							0	0.714	0.75	0.81	0.364	0.25	0.4	0.8	0.167	0.333	0.4	0.5	0.5	0.889
Sint Maarten (Dutch part)	SXM	2016	40		9.25625				0.4	0			0.0711667	0.0795	0.25	0.0385			1		-99		-99	1	0	1	0	0	0								0	0	0.045	0.182	0	0.2	0.4	0.077	0	0	0	0	0.5
Somalia	SOM	2016	6.6		33.1063		0		0.066	0		0	0.309667	0.340333	0.4375	0.261	0	0.066	0		-99	0	-99	0	0	0.33	0	0	0							0	0.143	0.375	0.524	0.091	0.125	0.6	0.6	0.231	0.111	0.4	0.2	0.5	0.875
St. Kitts and Nevis	KNA	2016	20		41.6938		25		0.2	0		0	0.332833	0.390167	0.625	0.5415	0.333333	0.066	1		-99	0.25	-99	0	0	1	0	0	0							0	0.429	0.25	0.429	0.364	0.125	0.4	0.8	0.083	0.125	0.333	0.5	0.5	0.75
St. Martin (French part)	MAF	2016	40		4.89375				0.4	0			0	0.075	0.125	0.0415			0		-99		-99	1	0	1	0	0	0								0	0	0	0	0	0	0.2	0	0	0	0	0.25	0.25
Syrian Arab Republic	SYR	2016	6.6		37.525		20		0.066	0		0	0.325167	0.4145	0.4445	0.3385	0.166667	0.468	0		-99	0.2	-99	0	0	0.33	0	0	0							0	0	0.286	0.667	0.273	0.125	0.6	0.8	0.154	0.5	0.333	0.2	0.5	0.889
Taiwan, China	TWN	2016	40						0.4		0.46									0.063	-99		-99	1	0	0	0	1		0.702	0.661	0.323	0.277	0.335	0.46
Timor-Leste	TLS	2016	50		62.3312				0.5		0.225	0	0.679333	0.475833	0.6945	0.8265		0.734	0	0.303	-99		-99	0.5	0	0	1	1		0	0.686	0	0.438	0	0.225	0	0.857	0.625	0.714	0.455	0.625	0.8	0.8	0.5	0.222	0.333	0.5	0.5	0.889
Tonga	TON	2016	70		49.2125		25		0.7	0		0	0.444167	0.429667	0.6875	0.628	0.666667	0.266	0		-99	0.25	-99	0.5	1	1	1	0	0							0	0.714	0.5	0.619	0.182	0.25	0.4	0.8	0.167	0.111	0.5	0.5	0.5	0.875
Turks and Caicos Islands	TCA	2016	60		10.8562				0.6	0			0.0075	0.1545	0.25	0.1325			1		-99		-99	1	0	1	1	0	0								0	0	0.045	0	0	0	0.6	0.077	0	0	0	0.25	0.5
Tuvalu	TUV	2016	10		34.225		5		0.1	0		0	0.329333	0.3755	0.3125	0.311	0.333333	0.066	0		-99	0.05	-99	0	0	0	0.5	0	0							0	0.143	0.143	0.476	0.364	0.25	0.6	0.8	0.231	0.222	0.333	0.167	0.5	0.625
Virgin Islands (U.S.)	VIR	2016	60		8.68125				0.6	0			0.0075	0.108333	0.25	0.097			1		-99		-99	1	0	1	1	0	0								0	0	0.045	0	0	0	0.4	0	0	0	0	0.25	0.5
West Bank and Gaza	PSE	2016	60		59.0812				0.6		0.395	0	0.597167	0.473167	0.9375	0.578		0.934	0.5	0.169	-99		-99	1	0	0	1	1		0.048	0.952	0	0.952	0.024	0.395	0	0.857	0.625	0.381	0.545	0.375	0.8	0.6	0.462	0.444	0.333	0.5	0.5	0.875
Afghanistan	AFG	2015	50		53.5688				0.5		0.202		0.567333	0.453667	0.4445	0.778		0.466	0	0.317	-99		-99	0	1	0	1	0.5		0.49	0	0	0.521	0	0.202		0.429	0.889	0.722	0.364	0.25	0.75	0.933	0.417	0.222	0.4	0	0.75	0.889
Albania	ALB	2015	80		63.1				0.8		0.319		0.654	0.561	0.6945	0.7085		0.534	1	0.231	-99		-99	1	1	0	1	1		0.773	0	0	0.758	0.063	0.319		0.857	0.7	0.737	0.455	0.375	0.8	0.8	0.583	0.333	0.5	0.4	0.75	0.889
Algeria	DZA	2015	60		56.1375				0.6		0.117		0.595667	0.506833	0.4445	0.739		0.266	1	0.024	-99		-99	0	1	0	1	1		0.143	0	0	0.442	0	0.117		0.429	0.667	0.833	0.545	0.5	0.6	0.933	0.583	0.375	0.4	0	0.75	0.889
American Samoa	ASM	2015	30		18.0188				0.3				0.107167	0.141667	0.5625	0.1325			1		-99		-99	1	0	0	0.5	0									0.143	0	0.1	0	0	0.4	0.4	0	0	0	0.2	0.25	0.625
Andorra	AND	2015	60		24.675				0.6				0.238167	0.182333	0.3335	0.379		0.4	1		-99		-99	1	1	0	1	0									0.143	0	0.579	0.182	0.125	0.4	0.6	0.077	0	0.167	0	0.25	0.667
Angola	AGO	2015	50		67.3312				0.5		0.09		0.575167	0.704167	0.9445	0.604		0.534	0	0.073	-99		-99	0	1	0	1	0.5		0.021	0.021	0.021	0.386	0	0.09		0.714	0.778	0.579	0.455	0.125	0.8	0.933	0.667	0.375	0.5	1	0.75	0.889
Antigua and Barbuda	ATG	2015	0		50.6375				0				0.430333	0.554333	0.625	0.472		0.2	1		-99		-99	0	0	0	0	0									0.429	0.286	0.778	0.364	0.125	0.6	1	0.25	0.143	0.333	0.6	1	0.75
Argentina	ARG	2015	50		74.2062				0.5		0.256		0.733833	0.754167	0.6945	0.778		0.732	1	0.3	-99		-99	0	1	0	0.5	1		0.742	0	0.207	0.333	0	0.256		0.857	0.7	0.944	0.727	0.375	0.8	1	0.75	0.625	0.4	0.75	1	0.889
Armenia	ARM	2015	80		68.9625				0.8		0.49		0.653333	0.697167	0.6945	0.771		0.666	1	0.167	-99		-99	1	1	0	1	1		0.805	0.73	0.414	0.5	0	0.49		0.714	0.667	0.944	0.545	0.25	0.8	0.933	0.75	0.5	0.5	0.5	1	0.889
Aruba	ABW	2015	40		17.5375				0.4				0.116333	0.188833	0.25	0.2375			1		-99		-99	1	0	0	1	0									0	0.125	0.1	0.273	0	0.2	0.8	0.083	0	0	0	0.25	0.5
Australia	AUS	2015	80		68.0563				0.8	1			0.654333	0.6535	0.9375	0.5835		1	1		1		1	1	1	0	1	1	1								0.857	0.75	0.833	0.636	0.25	0.6	0.8	0.667	0.571	0.333	0.8	0.75	0.875
Austria	AUT	2015	80		68.2687				0.8	1			0.611167	0.720833	0.9445	0.521		0.934	1		1		1	1	1	0	1	1	1								0.714	0.6	0.778	0.6	0.375	0.6	0.8	0.75	0.625	0.6	0.8	0.75	0.889
Azerbaijan	AZE	2015	60		59.5				0.6		0.336		0.6815	0.5	0.4445	0.771		0.4	1	0.472	-99		-99	0	1	0	1	1		0.503	0	0.435	0.744	0	0.336		0.429	0.889	0.842	0.5	0.429	1	0.933	0.417	0.5	0.4	0	0.75	0.889
Bahamas, The	BHS	2015	80		34.5063				0.8				0.299667	0.382	0.25	0.4655		0.066	0.5		-99		-99	1	1	0	1	1									0.143	0.143	0.789	0.273	0.25	0.2	1	0.25	0.125	0.167	0	0.75	0.5
Bahrain	BHR	2015	70		38.5375				0.7				0.3975	0.441333	0.25	0.3165		0.2	1		-99		-99	1	1	0	1	0.5									0.143	0.375	0.778	0.364	0.125	0.6	1	0.231	0.5	0.167	0	0.75	0.5
Bangladesh	BGD	2015	70		68.4375				0.7		0.158		0.690667	0.645833	0.6945	0.771		0.732	0	0.402	-99		-99	0.5	1	0	1	1		0.096	0.096	0.096	0.5	0	0.158		0.286	0.889	0.833	0.636	0.5	1	0.933	0.667	0.375	0.4	0.75	0.75	0.889
Barbados	BRB	2015	80		49.7188				0.8				0.483667	0.4625	0.5	0.639		0.134	1		-99		-99	1	1	0	1	1									0.429	0.375	0.778	0.545	0.375	0.4	1	0.333	0.125	0.167	0.4	0.75	0.5
Belarus	BLR	2015	60		56.7625				0.6		0.178		0.639667	0.494333	0.375	0.764		0.334	1	0.381	-99		-99	1	1	0	1	0		0.083	0	0	0.805	0	0.178		0.571	0.667	0.895	0.455	0.25	1	0.8	0.583	0.333	0.5	0	0.75	0.75
Belgium	BEL	2015	80		59.1812				0.8	1			0.6345	0.621833	0.4445	0.521		0.8	1		1		1	1	1	0	1	1	1								0.429	0.7	0.778	0.8	0.5	0.6	0.8	0.667	0.714	0.6	0.2	0.75	0.889
Belize	BLZ	2015	60		63.3312				0.6		0.152		0.5865	0.613833	0.6945	0.771		0.6	0	0.285	-99		-99	0	1	0	1	1		0.351	0.021	0.042	0.346	0	0.152		0.571	0.667	0.895	0.636	0.25	0.5	0.933	0.667	0.25	0.333	0.75	0.75	0.889
Benin	BEN	2015	70		55.1				0.7		0.127		0.583833	0.565167	0.389	0.572		0.6	0	0.276	-99		-99	1	1	0	1	0.5		0.137	0.024	0	0.475	0	0.127		0.429	0.667	0.737	0.545	0.375	0.75	0.933	0.583	0.375	0.5	0.25	0.75	0.778
Bermuda	BMU	2015	40		17.7063				0.4				0.128833	0.1775	0.25	0.2475			1		-99		-99	1	0	0	1	0									0	0	0.1	0.273	0	0.4	0.6	0.154	0.111	0	0.2	0	0.5
Bhutan	BTN	2015	70		61.725				0.7		0.196		0.673	0.5425	0.6945	0.597		0.534	0	0.454	-99		-99	0.5	1	0	1	1		0.488	0	0	0.49	0	0.196		0.857	0.667	0.684	0.455	0.375	1	0.933	0.417	0.222	0.333	0.6	0.75	0.889
Bolivia	BOL	2015	70		66.8438				0.7		0.352		0.716333	0.627667	0.6875	0.628		0.602	0	0.122	-99		-99	1	1	0	1	0.5		0.976	0	0.405	0.379	0	0.352		0.857	0.9	0.889	0.727	0.125	0.8	0.933	0.75	0.333	0.5	0.5	0.75	0.875
Bosnia and Herzegovina	BIH	2015	70		59.25				0.7		0.086		0.645667	0.5315	0.4445	0.764		0.6	1	0.128	-99		-99	0.5	1	0	1	1		0	0	0	0.429	0	0.086		0.571	0.778	0.895	0.455	0.375	0.8	0.8	0.583	0.556	0.5	0	0.75	0.889
Botswana	BWA	2015	40		59.9562				0.4		0.089		0.589333	0.576667	0.6945	0.604		0.6	0.5	0.192	-99		-99	0.5	0	0	1	0.5		0	0	0	0.443	0	0.089		0.429	0.7	0.737	0.545	0.125	1	0.933	0.333	0.444	0.6	0.4	0.75	0.889
Brazil	BRA	2015	70		73.5438				0.7		0.39		0.7015	0.7735	0.6875	0.771		0.6	1	0.195	-99		-99	1	1	0	1	0.5		0.443	0.267	0.351	0.89	0	0.39		0.714	0.778	0.842	0.5	0.375	1	0.933	0.833	0.625	0.5	0.75	1	0.875
British Virgin Islands	VGB	2015	20		14.1188				0.2				0.0871667	0.175667	0.25	0.091			1		-99		-99	1	0	0	0	0									0	0	0.05	0.273	0	0.2	0.4	0.154	0	0	0	0.5	0.5
Brunei Darussalam	BRN	2015	80		37.975				0.8				0.313667	0.463833	0.3335	0.372		0.334	1		-99		-99	1	1	0	1	1									0.143	0.222	0.778	0.364	0.125	0.25	1	0.583	0.25	0.2	0	0.75	0.667
Bulgaria	BGR	2015	80		65.4375				0.8		0.363		0.636833	0.617333	0.8335	0.639		0.934	1	0.122	-99		-99	1	1	0	1	1		0.478	0	0.379	0.958	0	0.363		0.857	0.8	0.789	0.4	0.375	0.6	0.6	0.583	0.571	0.4	0.8	0.75	0.667
Burkina Faso	BFA	2015	50		66.0625				0.5		0.093		0.664167	0.586	0.9375	0.597		0.8	0	0.227	-99		-99	0	1	0	1	0.5		0	0	0	0.467	0	0.093		1	0.778	0.737	0.545	0.125	0.8	0.933	0.417	0.333	0.333	0.75	0.75	0.875
Burundi	BDI	2015	60		65.75				0.6		0.084		0.606667	0.624833	0.9375	0.628		0.532	0	0.164	-99		-99	0.5	1	0	1	0.5		0	0	0	0.422	0	0.084		0.857	0.556	0.722	0.455	0.25	0.8	0.933	0.583	0.333	0.4	0.75	0.75	0.875
Cabo Verde	CPV	2015	60		58.675				0.6		0.234		0.535667	0.596167	0.6945	0.604		0.466	1	0.29	-99		-99	0	1	0	1	1		0.358	0	0.346	0.467	0	0.234		0.714	0.444	0.842	0.364	0.25	0.6	0.8	0.333	0.444	0.4	0.6	1	0.889
Cambodia	KHM	2015	60		70.5062				0.6		0.158		0.745833	0.645833	0.6945	0.771		0.734	0	0.136	-99		-99	0	1	0	1	1		0.26	0	0.215	0.312	0	0.158		0.714	0.667	0.833	0.636	0.625	1	0.933	0.667	0.625	0.4	0.5	0.75	0.889
Cameroon	CMR	2015	60		68.4375				0.6		0.107		0.741167	0.604167	0.6945	0.7445		0.6	0	0.237	-99		-99	0.5	1	0	1	0.5		0.045	0	0.024	0.467	0	0.107		0.857	0.667	0.737	0.636	0.75	0.8	0.933	0.667	0.375	0.4	0.5	0.75	0.889
Canada	CAN	2015	80		57.1688				0.8	1			0.569167	0.615	0.4375	0.5835		1	1		1		1	1	1	0	1	1	1								0.429	0.778	0.778	0.455	0.375	0.6	0.8	0.583	0.857	0.5	0.2	0.75	0.875
Cayman Islands	CYM	2015	20		15.5062				0.2				0.072	0.187833	0.25	0.211			1		-99		-99	1	0	0	0	0									0	0	0.05	0.182	0	0.2	0.8	0.077	0	0	0	0.25	0.5
Central African Republic	CAF	2015	20		45.8438				0.2				0.448	0.426833	0.6945	0.3485		0.2	0		-99		-99	0	0	0	1	0									0.286	0.625	0.579	0.273	0.125	0.8	0.8	0.25	0.111	0.4	0.5	0.5	0.889
Chad	TCD	2015	50		50.9875				0.5		0.073		0.672667	0.3795	0.4445	0.478		0.2	0	0.188	-99		-99	0.5	1	0	1	0		0	0	0	0.367	0	0.073		0.571	0.667	0.737	0.636	0.625	0.8	0.933	0.333	0.111	0.4	0	0.5	0.889
Channel Islands	CHI	2015	40						0.4												-99		-99	1	0	0	1	0
Chile	CHL	2015	80		76.4437				0.8	1	0.268		0.8	0.708333	0.9445	0.646		0.534	1	0.392	1		1	1	1	0	1	1	1	0.389	0.119	0	0.83	0	0.268		1	0.9	0.889	0.636	0.375	1	1	0.75	0.75	0.5	0.75	0.5	0.889
China	CHN	2015	70		56.7938				0.7		0.456		0.572333	0.530167	0.6945	0.5415		0.4	0	0.767	-99		-99	1	1	0	1	0.5		0.883	0.021	0	0.896	0.479	0.456		0.714	0.8	0.722	0.273	0.125	0.8	0.8	0.231	0.5	0.4	0.5	0.75	0.889
Colombia	COL	2015	80		79.1188				0.8		0.35		0.776	0.745833	0.9375	0.8265		1	0	0.359	-99		-99	1	1	0	1	1		0.797	0	0.137	0.817	0	0.35		1	0.667	0.944	0.545	0.5	1	0.933	0.667	0.625	0.5	1	0.75	0.875
Comoros	COM	2015	40		55.125				0.4				0.555	0.511833	0.6875	0.522		0.334	0		-99		-99	0	0	0	1	1									0.714	0.429	0.789	0.273	0.625	0.5	0.933	0.583	0.222	0.333	0.5	0.5	0.875
Congo, Dem. Rep.	COD	2015	70		54.7188				0.7		0.068		0.648	0.461	0.4445	0.606		0.6	0	0.276	-99		-99	0.5	1	0	1	1		0	0	0	0.338	0	0.068		0.571	0.75	0.722	0.545	0.5	0.8	0.933	0.5	0.5	0.333	0	0.5	0.889
Congo, Rep.	COG	2015	70		53.4688				0.7		0.096		0.667667	0.411333	0.4445	0.596		0.4	0	0.303	-99		-99	0.5	1	0	1	1		0	0	0	0.479	0	0.096		0.571	0.778	0.737	0.545	0.375	1	0.933	0.385	0.25	0.4	0	0.5	0.889
Costa Rica	CRI	2015	80		74.9375				0.8				0.7645	0.645833	0.9375	0.8265		0.6	1		-99		-99	1	1	0	1	1									1	0.667	1	0.545	0.375	1	0.933	0.667	0.625	0.4	0.75	0.5	0.875
Cote d'Ivoire	CIV	2015	60		63.7125				0.6		0.334		0.715333	0.5485	0.6945	0.611		0.534	0	0.174	-99		-99	0.5	1	0	1	0.5		0.432	0.408	0.374	0.355	0.1	0.334		0.857	0.778	0.737	0.545	0.375	1	0.933	0.583	0.375	0.4	0.5	0.5	0.889
Croatia	HRV	2015	70		47.175				0.7				0.5155	0.4785	0.3335	0.4585		0.866	1		-99		-99	1	1	0	0.5	1									0.429	0.6	0.789	0.3	0.375	0.6	0.8	0.5	0.571	0.5	0	0.5	0.667
Cuba	CUB	2015	70		47.675				0.7		0.357		0.5005	0.435667	0.4445	0.561			1	0.504	-99		-99	1	1	0	1	0.5		0.818	0	0	0.967	0	0.357		0.143	0.375	0.944	0.455	0.286	0.8	0.6	0.231	0.5	0.333	0.2	0.75	0.889
Curacao	CUW	2015	20		14.3562				0.2				0.05	0.219167	0.25	0.091			1		-99		-99	1	0	0	0	0									0	0	0.1	0	0	0.2	0.8	0.154	0.111	0	0	0.25	0.5
Cyprus	CYP	2015	60		53.5438				0.6				0.563833	0.516667	0.5835	0.4585		0.934	1		-99		-99	1	0	0	1	1									0.571	0.6	0.737	0.5	0.375	0.6	0.8	0.5	0.5	0.4	0.4	0.5	0.667
Czech Republic	CZE	2015	70		68.1188				0.7	1			0.644167	0.665333	0.9445	0.5765		0.934	1		1		1	1	1	0	0.5	1	1								0.857	0.6	0.833	0.6	0.375	0.6	0.8	0.667	0.625	0.6	0.8	0.5	0.889
Denmark	DNK	2015	70		60.3875				0.7	1			0.629667	0.598667	0.625	0.521		0.866	1		1		1	1	1	0	0.5	1	1								0.714	0.6	0.789	0.7	0.375	0.6	0.8	0.667	0.625	0.6	0.4	0.5	0.75
Djibouti	DJI	2015	20		51.9				0.2		0.005		0.558667	0.440167	0.5835	0.572		0.268	0	0.126	-99		-99	0	0	0	1	0		0	0	0	0.024	0	0.005		0.714	0.571	0.737	0.455	0.375	0.5	0.933	0.25	0.125	0.333	0.5	0.5	0.667
Dominica	DMA	2015	20		46.1063				0.2				0.438333	0.3875	0.639	0.572		0.2	1		-99		-99	0	1	0	0	0									0.571	0.444	0.526	0.364	0.125	0.6	0.8	0.167	0.125	0.333	0.4	0.5	0.778
Dominican Republic	DOM	2015	80		61				0.8		0.27		0.705333	0.479167	0.4445	0.882		0.6	0	0.419	-99		-99	1	1	0	1	1		0.568	0	0	0.782	0	0.27		0.571	0.778	0.947	0.636	0.5	0.8	0.933	0.667	0.375	0.4	0	0.5	0.889
Ecuador	ECU	2015	80		70.8187				0.8		0.176		0.7765	0.6735	0.6875	0.628		0.8	0	0.381	-99		-99	1	1	0	1	1		0.463	0	0.111	0.306	0	0.176		0.857	0.889	0.944	0.455	0.714	0.8	0.933	0.583	0.625	0.4	0.75	0.75	0.875
Egypt, Arab Rep.	EGY	2015	80		78.8875				0.8		0.301		0.7935	0.701333	0.9445	0.882		0.6	1	0.149	-99		-99	1	1	0	1	1		0.316	0	0.316	0.872	0	0.301		1	0.889	0.947	0.5	0.625	0.8	0.933	0.75	0.625	0.4	1	0.5	0.889
El Salvador	SLV	2015	70		72.7562				0.7		0.14		0.770667	0.6625	0.6945	0.8265		0.334	1	0.14	-99		-99	1	1	0	1	0.5		0.313	0	0	0.367	0.021	0.14		0.857	0.778	0.944	0.545	0.5	1	0.933	0.667	0.625	0.5	0.5	0.75	0.889
Equatorial Guinea	GNQ	2015	20		49.425				0.2				0.499	0.448667	0.6945	0.4165		0.132	0		-99		-99	0	1	0	0	0									0.429	0.5	0.526	0.364	0.375	0.8	1	0.167	0.125	0.4	0.5	0.5	0.889
Eritrea	ERI	2015	20		37.0438				0.2				0.406667	0.346	0.4445	0.261		0	0		-99		-99	0	1	0	0	0									0.143	0.429	0.579	0.364	0.125	0.8	0.8	0.154	0.222	0.4	0	0.5	0.889
Estonia	EST	2015	80		66.7375				0.8	1			0.7255	0.632833	0.75	0.514		0.934	1		1		1	1	1	0	1	1	1								1	0.7	0.778	0.7	0.375	0.8	0.8	0.583	0.714	0.6	0.6	0.5	0.5
Eswatini	SWZ	2015	40		62.75				0.4		0.073		0.662667	0.5055	0.9375	0.578		0.266	0	0	-99		-99	0	1	0	1	0		0	0	0.183	0.183	0	0.073		0.714	0.889	0.778	0.545	0.25	0.8	0.8	0.25	0.333	0.4	0.75	0.5	0.875
Ethiopia	ETH	2015	80		65.3375				0.8		0.12		0.717667	0.591833	0.6945	0.604		1	0	0.153	-99		-99	1	1	0	1	1		0.189	0	0	0.412	0	0.12		0.714	0.9	0.737	0.455	0.5	1	0.933	0.462	0.556	0.6	0.5	0.5	0.889
Faroe Islands	FRO	2015	40		9.01875				0.4				0.0416667	0.0666667	0.25	0.1465			1		-99		-99	1	0	0	1	0									0	0	0.05	0	0	0.2	0.4	0	0	0	0	0	0.5
Fiji	FJI	2015	70		58.4312				0.7		0.162		0.604833	0.483333	0.6945	0.7155		0.334	1	0.024	-99		-99	0.5	1	0	1	1		0.214	0	0	0.467	0.129	0.162		0.857	0.444	0.789	0.364	0.375	0.8	0.933	0.417	0.25	0.4	0.4	0.5	0.889
Finland	FIN	2015	80		66.575				0.8	1			0.668333	0.620833	0.9375	0.521		0.732	1		1		1	1	1	0	1	1	1								0.857	0.7	0.778	0.7	0.375	0.6	0.8	0.667	0.625	0.333	0.8	0.5	0.875
France	FRA	2015	80		62.4375				0.8	1			0.6445	0.615333	0.6945	0.521		0.934	1		1		1	1	1	0	1	1	1								0.714	0.7	0.778	0.7	0.375	0.6	0.8	0.667	0.625	0.5	0.6	0.5	0.889
French Polynesia	PYF	2015	50		12.9812				0.5				0.0375	0.1545	0.3125	0.15			1		-99		-99	1	0	0	1	0.5									0	0.125	0.1	0	0	0	0.6	0.077	0	0	0	0.25	0.625
Gabon	GAB	2015	20		45.2313				0.2		0.074		0.487333	0.3985	0.389	0.572		0.198	0	0.073	-99		-99	0	0	0	1	0		0	0	0	0.368	0	0.074		0.143	0.667	0.632	0.182	0.5	0.8	0.933	0.308	0.25	0.4	0	0.5	0.778
Gambia, The	GMB	2015	40		59.0625				0.4		0.283		0.6415	0.553	0.625	0.5165		0.6	0	0.237	-99		-99	0	1	0	1	0		0.477	0.067	0.42	0.449	0	0.283		0.714	0.625	0.737	0.273	0.5	1	0.933	0.385	0.5	0.5	0.5	0.5	0.75
Georgia	GEO	2015	70		58.1688				0.7		0.568		0.617833	0.509667	0.4445	0.8265		0.6	1	0.377	-99		-99	1	1	0	1	0.5		0.846	0.684	0.467	0.844	0	0.568		0.571	0.667	0.889	0.455	0.125	1	0.933	0.5	0.625	0.5	0	0.5	0.889
Germany	DEU	2015	80		62.8937				0.8	1			0.625167	0.646833	0.6945	0.521		0.934	1		1		1	1	1	0	1	1	1								0.714	0.6	0.737	0.6	0.5	0.6	0.8	0.667	0.714	0.6	0.6	0.5	0.889
Ghana	GHA	2015	70		67.075				0.7		0.193		0.739167	0.590167	0.6945	0.6835		0.534	0	0.342	-99		-99	0.5	1	0	1	1		0.159	0.159	0.204	0.446	0	0.193		0.857	0.667	0.684	0.727	0.5	1	0.933	0.583	0.375	0.4	0.75	0.5	0.889
Gibraltar	GIB	2015	40		8.43125				0.4				0.0666667	0.0851667	0.125	0.094			1		-99		-99	1	0	0	1	0									0	0	0	0	0	0.4	0.4	0	0.111	0	0	0	0.25
Greece	GRC	2015	80		60.125				0.8	1			0.601333	0.596833	0.6945	0.521		0.934	1		1		1	1	1	0	1	1	1								0.571	0.7	0.737	0.5	0.5	0.6	0.8	0.667	0.714	0.5	0.4	0.5	0.889
Greenland	GRL	2015	30		11.275				0.3				0.0833333	0.0795	0.3125	0.101			1		-99		-99	1	0	0	0.5	0									0	0	0.1	0	0	0.4	0.4	0.077	0	0	0	0	0.625
Grenada	GRD	2015	30		48.7125				0.3				0.447667	0.429167	0.6945	0.572		0.2	1		-99		-99	0	1	0	0.5	0									0.429	0.375	0.684	0.273	0.125	0.8	0.867	0.25	0.125	0.333	0.5	0.5	0.889
Guam	GUM	2015	60		13.3				0.6				0.0833333	0.141667	0.25	0.139			1		-99		-99	1	0	0	1	1									0	0	0.1	0	0	0.4	0.6	0	0	0	0	0.25	0.5
Guatemala	GTM	2015	70		75.575				0.7		0.207		0.778667	0.6625	0.9445	0.778		0.734	1	0.318	-99		-99	0.5	1	0	1	1		0.546	0	0.146	0.342	0	0.207		1	0.778	0.889	0.455	0.75	0.8	0.933	0.667	0.625	0.5	0.75	0.5	0.889
Guinea	GIN	2015	50		52.1875				0.5		0.093		0.571	0.3985	0.6945	0.572		0.268	0	0.251	-99		-99	0.5	1	0	1	0		0	0	0	0.467	0	0.093		0.714	0.625	0.632	0.455	0.25	0.75	0.933	0.25	0.125	0.333	0.25	0.5	0.889
Guinea-Bissau	GNB	2015	40		41.9937				0.4		0.164		0.466333	0.3545	0.375	0.522		0.266	0	0.136	-99		-99	0	1	0	1	0		0.245	0.245	0.245	0.086	0	0.164		0.143	0.625	0.632	0.273	0.375	0.75	0.933	0.25	0.111	0.333	0	0.5	0.75
Guyana	GUY	2015	40		55.7687				0.4		0.199		0.595	0.451333	0.5835	0.739		0.2	0	0.16	-99		-99	0	1	0	1	0		0.196	0	0	0.389	0.412	0.199		0.571	0.75	0.944	0.455	0.25	0.6	0.933	0.25	0.125	0.4	0.5	0.5	0.667
Haiti	HTI	2015	70		48.25				0.7		0.025		0.516	0.457667	0.4445	0.4945		0.268	0	0	-99		-99	1	1	0	1	0.5		0	0	0	0.126	0	0.025		0.571	0.556	0.737	0.182	0.25	0.8	0.933	0.538	0.375	0.4	0	0.5	0.889
Honduras	HND	2015	70		72.9938				0.7		0.254		0.7405	0.701333	0.6875	0.8265		0.8	0.5	0.277	-99		-99	1	1	0	1	0.5		0.747	0	0.054	0.467	0	0.254		0.571	0.667	0.944	0.636	0.625	1	0.933	0.75	0.625	0.4	0.75	0.75	0.875
Hong Kong SAR, China	HKG	2015	60		28.925				0.6				0.221667	0.288167	0.3125	0.472			1		-99		-99	1	0	0	1	1									0	0.25	0.1	0.455	0.125	0.4	0.6	0.25	0.429	0.2	0	0.25	0.625
Hungary	HUN	2015	80		57.7687				0.8	1			0.611167	0.542667	0.5835	0.5765		0.934	1		1		1	1	1	0	1	1	1								0.714	0.7	0.778	0.5	0.375	0.6	0.8	0.667	0.556	0.333	0.4	0.5	0.667
Iceland	ISL	2015	60		52.8875				0.6	1			0.5315	0.557	0.4375	0.528		0.732	1		1		1	1	0	0	1	1	1								0.571	0.667	0.737	0.364	0.25	0.6	0.8	0.667	0.625	0.5	0	0.75	0.875
India	IND	2015	60		59.8125				0.6		0.345		0.613	0.579167	0.4375	0.771		0.866	0	0.558	-99		-99	0.5	1	0	1	0.5		1	0	0.305	0.419	0	0.345		0.571	0.9	0.684	0.273	0.25	1	0.933	0.667	0.625	0.5	0.25	0.5	0.875
Indonesia	IDN	2015	80		65.4813				0.8		0.276		0.683167	0.613833	0.6945	0.653		0.734	0	0.472	-99		-99	1	1	0	1	1		0.559	0	0.048	0.773	0	0.276		0.857	0.889	0.722	0.545	0.286	0.8	0.933	0.5	0.5	0.5	0.75	0.5	0.889
Iran, Islamic Rep.	IRN	2015	60		59.5187				0.6		0.253		0.662833	0.520667	0.6945	0.5165		0.4	1	0.283	-99		-99	1	0	0	1	1		0.426	0	0	0.837	0	0.253		0.571	0.667	0.944	0.545	0.25	1	0.933	0.333	0.625	0.333	0.4	0.5	0.889
Iraq	IRQ	2015	60		57.3062				0.6				0.584	0.562833	0.6945	0.4495		0.4	0		-99		-99	0.5	1	0	1	0.5									0.714	0.625	0.842	0.273	0.25	0.8	0.933	0.417	0.444	0.333	0.75	0.5	0.889
Ireland	IRL	2015	80		59.7812				0.8	1			0.587667	0.601333	0.6945	0.521		0.866	1		1		1	1	1	0	1	1	1								0.714	0.6	0.737	0.5	0.375	0.6	0.8	0.583	0.625	0.5	0.6	0.5	0.889
Isle of Man	IMN	2015	20		8.96875				0.2				0.0571667	0.0905	0.125	0.1495			1		-99		-99	1	0	0	0	0									0.143	0	0	0	0	0.2	0.4	0	0	0.143	0	0	0.25
Israel	ISR	2015	80		47.3438				0.8	1			0.534333	0.431833	0.3125	0.5765		0.4	1		1		1	1	1	0	1	1	1								0.286	0.75	0.684	0.636	0.25	0.6	0.8	0.583	0.625	0.333	0	0.25	0.625
Italy	ITA	2015	80		67.8937				0.8	1			0.6585	0.6635	0.9445	0.521		0.934	1		1		1	1	1	0	1	1	1								0.714	0.7	0.737	0.7	0.5	0.6	0.8	0.667	0.714	0.5	0.8	0.5	0.889
Jamaica	JAM	2015	60		59.2313				0.6		0.138		0.581167	0.509833	0.6945	0.771		0.6	1	0.151	-99		-99	0	1	0	1	1		0.143	0.048	0.048	0.454	0	0.138		0.571	0.778	0.833	0.455	0.25	0.6	0.867	0.417	0.375	0.4	0.5	0.5	0.889
Japan	JPN	2015	70		64.1625				0.7	1			0.608667	0.593	0.9445	0.5835		0.666	1		1		1	1	1	0	0.5	1	1								1	0.444	0.778	0.455	0.375	0.6	0.8	0.5	0.625	0.333	0.8	0.5	0.889
Jordan	JOR	2015	70		63.0187				0.7		0.304		0.671167	0.520833	0.6945	0.771		0.6	0.5	0.474	-99		-99	0.5	1	0	1	1		0.405	0.405	0.277	0.432	0	0.304		0.429	0.889	0.789	0.545	0.375	1	0.933	0.417	0.375	0.4	0.5	0.5	0.889
Kazakhstan	KAZ	2015	80		69.6125				0.8		0.171		0.752167	0.578667	0.6945	0.882		0.6	1	0.29	-99		-99	1	1	0	1	1		0.413	0	0	0.44	0	0.171		0.857	0.667	0.944	0.545	0.5	1	0.933	0.583	0.556	0.5	0.4	0.5	0.889
Kenya	KEN	2015	50		66.0938				0.5		0.246		0.723167	0.513833	0.6945	0.882		0.534	0	0.237	-99		-99	0.5	1	0	1	0		0.281	0.281	0.281	0.389	0	0.246		0.857	0.9	0.684	0.273	0.625	1	0.933	0.25	0.25	0.4	0.75	0.5	0.889
Kiribati	KIR	2015	40		45.3438				0.4		0.07		0.371	0.449333	0.625	0.5415		0.266	0	0	-99		-99	0	1	0	1	0		0.071	0	0	0.277	0	0.07		0.286	0.333	0.684	0.273	0.25	0.4	0.933	0.308	0.222	0.333	0.4	0.5	0.75
Korea, Dem. People’s Rep.	PRK	2015	40		35.4				0.4				0.384667	0.334833	0.4375	0.236			0		-99		-99	1	0	0	1	0									0	0.625	0.667	0.091	0.125	0.8	0.8	0.154	0.222	0.333	0	0.5	0.875
Korea, Rep.	KOR	2015	80		67.6063				0.8	1			0.677833	0.632	0.9445	0.5345		1	1		1		1	1	1	0	1	1	1								1	0.667	0.789	0.636	0.375	0.6	0.8	0.417	0.625	0.6	0.6	0.75	0.889
Kosovo	XKX	2015	20						0.2		0.315							0.6		0.136	-99		-99	1	0	0	0	0		0.308	0	0.204	0.932	0.132	0.315
Kuwait	KWT	2015	80		55.6375				0.8				0.514667	0.543	0.75	0.528		0.8	1		-99		-99	1	1	0	1	1									0.429	0.667	0.778	0.364	0.25	0.6	1	0.25	0.375	0.333	0.8	0.5	0.5
Kyrgyz Republic	KGZ	2015	80		71.4938				0.8		0.233		0.773667	0.5795	0.9445	0.7155		0.4	1	0.364	-99		-99	1	1	0	1	1		0.765	0	0	0.4	0	0.233		1	0.667	0.895	0.455	0.625	1	0.933	0.5	0.444	0.5	0.6	0.5	0.889
Lao PDR	LAO	2015	50		59.1437				0.5		0.084		0.688	0.437833	0.6945	0.6595		0.6	0	0.167	-99		-99	0.5	1	0	1	0		0	0	0	0.422	0	0.084		0.714	0.625	0.778	0.636	0.375	1	0.933	0.25	0.111	0.333	0.5	0.5	0.889
Latvia	LVA	2015	80		48.6063				0.8	1			0.540167	0.501333	0.25	0.514		0.934	1		1		1	1	1	0	1	1	1								0.429	0.6	0.737	0.5	0.375	0.6	0.8	0.583	0.625	0.5	0	0.5	0.5
Lebanon	LBN	2015	20		54.7375				0.2		0.234		0.550833	0.438833	0.6945	0.7155		0.334	1	0.24	-99		-99	0	0	0	1	0		0.693	0	0	0.479	0	0.234		0.714	0.667	0.526	0.273	0.125	1	0.733	0.25	0.25	0.4	0.5	0.5	0.889
Lesotho	LSO	2015	60		48.4188				0.6		0.241		0.506667	0.4165	0.4445	0.6595		0.668	0	0.199	-99		-99	0	1	0	1	1		0.34	0.024	0.218	0.624	0	0.241		0.286	0.667	0.632	0.455	0.25	0.75	0.933	0.333	0.333	0.4	0	0.5	0.889
Liberia	LBR	2015	50		59.5375				0.5		0.245		0.64	0.5235	0.6945	0.578		0.534	0	0.216	-99		-99	0	1	0	1	0.5		0.424	0	0.376	0.427	0	0.245		0.714	0.778	0.684	0.364	0.5	0.8	0.933	0.5	0.125	0.333	0.75	0.5	0.889
Libya	LBY	2015	40		35.6875				0.4				0.384167	0.322167	0.4445	0.2915		0.134	0		-99		-99	0	0	0	1	1									0.143	0.714	0.632	0.091	0.125	0.6	0.6	0.25	0.25	0.333	0	0.5	0.889
Liechtenstein	LIE	2015	40		23.1938				0.4				0.189	0.2105	0.3335	0.3235			1		-99		-99	1	0	0	1	0									0.143	0.143	0.05	0.273	0.125	0.4	0.4	0.077	0	0.286	0	0.5	0.667
Lithuania	LTU	2015	80		52.55				0.8	1			0.613833	0.532833	0.25	0.514		0.866	1		1		1	1	1	0	1	1	1								0.571	0.7	0.737	0.5	0.375	0.8	0.8	0.583	0.714	0.6	0	0.5	0.5
Luxembourg	LUX	2015	60		49.825				0.6	1			0.5355	0.508333	0.389	0.4655		0.666	1		1		1	1	0	0	1	1	1								0.429	0.6	0.684	0.4	0.5	0.6	0.8	0.583	0.667	0.5	0	0.5	0.778
Macao SAR, China	MAC	2015	60		21.475				0.6				0.152333	0.198167	0.25	0.4165			1		-99		-99	1	0	0	1	1									0	0.25	0.1	0.364	0	0.2	0.6	0.167	0.222	0.2	0	0	0.5
Madagascar	MDG	2015	80		60.3062				0.8		0.085		0.622167	0.5555	0.6945	0.597		0.534	0	0.102	-99		-99	1	1	0	1	1		0.116	0	0	0.311	0	0.085		0.857	0.778	0.684	0.364	0.25	0.8	0.933	0.5	0.5	0.4	0.5	0.5	0.889
Malawi	MWI	2015	70		66.0438				0.7		0.381		0.654667	0.5185	0.9445	0.8195		0.734	0	0.419	-99		-99	0.5	1	0	1	1		0.512	0.479	0.446	0	0.467	0.381		0.714	0.9	0.684	0.455	0.375	0.8	0.933	0.417	0.111	0.4	0.75	0.5	0.889
Malaysia	MYS	2015	80		70.15				0.8		0.144		0.722833	0.615333	0.9445	0.653		0.466	1	0.108	-99		-99	1	1	0	1	1		0.446	0.021	0	0.251	0	0.144		1	0.9	0.842	0.545	0.25	0.8	0.8	0.667	0.625	0.5	0.6	0.5	0.889
Maldives	MDV	2015	50		43.4125				0.5		0.202		0.4925	0.368	0.375	0.5165		0.266	1	0.08	-99		-99	0	1	0	1	0.5		0.517	0.021	0	0.44	0.033	0.202		0.286	0.375	0.789	0.455	0.25	0.8	0.8	0.25	0.125	0.333	0.2	0.5	0.75
Mali	MLI	2015	60		58.8875				0.6		0.163		0.625	0.565667	0.639	0.5		0.868	0	0.342	-99		-99	0	1	0	1	1		0	0	0.349	0.467	0	0.163		0.571	0.9	0.684	0.545	0.25	0.8	0.8	0.5	0.444	0.4	0.75	0.5	0.778
Malta	MLT	2015	60		43.8375				0.6				0.516167	0.416667	0.25	0.4585		0.934	1		-99		-99	1	0	0	1	1									0.429	0.556	0.737	0.4	0.375	0.6	0.6	0.5	0.5	0.4	0	0.5	0.5
Marshall Islands	MHL	2015	10		39.7812				0.1		0.065		0.356333	0.385167	0.625	0.333		0.066	0	0.091	-99		-99	0	0	0	0.5	0		0	0	0	0.323	0	0.065		0.429	0.286	0.5	0.273	0.25	0.4	0.8	0.167	0.111	0.333	0.4	0.5	0.75
Mauritania	MRT	2015	50		50.4813				0.5		0.211		0.6105	0.376333	0.4445	0.6335		0.466	0	0.076	-99		-99	0.5	0	0	1	1		0.322	0	0.277	0.457	0	0.211		0.571	0.778	0.684	0.455	0.375	0.8	0.8	0.5	0.125	0.333	0	0.5	0.889
Mauritius	MUS	2015	70		64.7687				0.7		0.246		0.630833	0.626333	0.6945	0.7155		0.6	1	0.097	-99		-99	0.5	1	0	1	1		0.188	0.042	0	0.5	0.5	0.246		0.857	0.6	0.842	0.636	0.25	0.6	0.8	0.583	0.625	0.4	0.6	0.75	0.889
Mexico	MEX	2015	80		80.2188				0.8		0.742		0.823333	0.727833	0.9375	0.8265		0.668	1	0.63	-99		-99	1	1	0	1	1		1	0.647	0.701	0.86	0.5	0.742		1	1	0.895	0.545	0.5	1	0.8	0.667	0.75	0.4	1	0.75	0.875
Micronesia, Fed. Sts.	FSM	2015	20		42.075				0.2		0.062		0.363833	0.431333	0.6875	0.293		0.2	0	0.32	-99		-99	0	0	0	1	0		0.021	0	0	0.289	0	0.062		0.571	0.143	0.421	0.273	0.375	0.4	0.8	0.333	0.222	0.333	0.4	0.5	0.875
Moldova	MDA	2015	80		57.7125				0.8		0.676		0.719	0.398667	0.4445	0.8195		0.534	1	0.199	-99		-99	1	1	0	1	1		0.952	0.929	0.5	1	0	0.676		0.571	0.875	0.842	0.455	0.571	1	0.6	0.417	0.625	0.5	0	0.25	0.889
Monaco	MCO	2015	60		16.9375				0.6				0.169667	0.111667	0.1875	0.3235			1		-99		-99	1	1	0	1	0									0	0.143	0.35	0	0.125	0.4	0.2	0.077	0	0.143	0	0.25	0.375
Mongolia	MNG	2015	80		66.7938				0.8		0.647		0.738167	0.5545	0.6945	0.771		0.6	1	0.542	-99		-99	1	1	0	1	1		1	1	0.5	0.737	0	0.647		0.857	0.9	0.842	0.455	0.375	1	0.8	0.5	0.444	0.333	0.75	0.5	0.889
Montenegro	MNE	2015	70		59.1812				0.7		0.201		0.6355	0.4815	0.6945	0.689		0.6	1	0.091	-99		-99	1	1	0	0.5	1		0.618	0.021	0	0.365	0	0.201		0.857	0.9	0.842	0.364	0.25	0.6	0.6	0.583	0.556	0.5	0.4	0.25	0.889
Morocco	MAR	2015	70		62.8875				0.7		0.12		0.699167	0.491667	0.6875	0.771		0.668	0	0.455	-99		-99	0.5	1	0	1	1		0.021	0	0	0.578	0	0.12		0.714	0.889	0.842	0.5	0.25	1	0.8	0.25	0.5	0.4	0.5	0.5	0.875
Mozambique	MOZ	2015	60		64.2562				0.6		0.111		0.673167	0.568	0.6945	0.7225		0.534	0	0.177	-99		-99	0.5	1	0	1	0.5		0.089	0	0	0.467	0	0.111		0.857	0.8	0.684	0.273	0.625	0.8	0.8	0.333	0.625	0.4	0.75	0.5	0.889
Myanmar	MMR	2015	60		64.5812				0.6				0.6465	0.562167	0.9445	0.596		0.532	0		-99		-99	0	1	0	1	1									1	0.667	0.632	0.455	0.375	0.75	0.8	0.615	0.375	0.333	0.75	0.5	0.889
Namibia	NAM	2015	70		71.3				0.7		0.1		0.695667	0.657	0.9375	0.7085		0.468	0.5	0.227	-99		-99	0.5	1	0	1	1		0.19	0	0	0.308	0	0.1		0.857	0.9	0.737	0.455	0.625	0.6	0.8	0.417	0.625	0.6	0.75	0.75	0.875
Nauru	NRU	2015	40		32.725				0.4				0.293167	0.347667	0.375	0.3205		0.2	1		-99		-99	0	1	0	1	0									0.143	0.143	0.55	0.273	0.25	0.4	0.8	0.231	0.222	0.333	0	0.5	0.75
Nepal	NPL	2015	50		64.4813				0.5		0.171		0.665333	0.500833	0.9445	0.7155		0.6	0	0.357	-99		-99	0	1	0	1	0.5		0	0	0	0.857	0	0.171		0.571	0.889	0.737	0.545	0.25	1	0.8	0.333	0.222	0.4	0.75	0.5	0.889
Netherlands	NLD	2015	80		56.7				0.8	1			0.609167	0.520833	0.625	0.521		0.8	1		1		1	1	1	0	1	1	1								0.571	0.6	0.684	0.7	0.5	0.6	0.6	0.667	0.625	0.333	0.4	0.5	0.75
New Caledonia	NCL	2015	50		20.375				0.5				0.168	0.1545	0.5625	0.1			1		-99		-99	1	0	0	1	0.5									0.286	0.222	0.1	0	0	0.4	0.4	0.077	0	0	0.2	0.25	0.625
New Zealand	NZL	2015	80		60.5938				0.8	1			0.539833	0.566667	0.9445	0.5835		0.8	1		1		1	1	1	0	1	1	1								0.857	0.375	0.737	0.545	0.125	0.6	0.6	0.5	0.75	0.5	0.8	0.25	0.889
Nicaragua	NIC	2015	70		65.7938				0.7		0.203		0.662833	0.6055	0.6875	0.771		0.4	0	0.122	-99		-99	0.5	1	0	1	1		0	0	0	0.571	0.446	0.203		0.857	0.667	0.789	0.364	0.5	0.8	0.8	0.583	0.5	0.5	0.75	0.5	0.875
Niger	NER	2015	80		68.9313				0.8		0.093		0.717833	0.577667	0.9445	0.6835		0.6	0	0.238	-99		-99	1	1	0	1	1		0	0	0	0.467	0	0.093		1	0.778	0.684	0.545	0.5	0.8	0.8	0.5	0.333	0.333	1	0.5	0.889
Nigeria	NGA	2015	60		51.1812				0.6		0.283		0.590167	0.443	0.4445	0.5505		0.666	0	0.502	-99		-99	0	1	0	1	1		0.503	0	0.446	0.467	0	0.283		0.286	0.889	0.684	0.182	0.5	1	0.8	0.333	0.375	0.4	0.25	0.5	0.889
North Macedonia	MKD	2015	80		54.4813				0.8		0.433		0.689667	0.366833	0.4445	0.7445		0.8	1	0.049	-99		-99	1	1	0	1	1		0.86	0.543	0.113	0.647	0	0.433		0.571	0.778	0.789	0.5	0.5	1	0.6	0.462	0.556	0.333	0	0.25	0.889
Northern Mariana Islands	MNP	2015	40		9.24375				0.4				0.0833333	0.0333333	0.3125	0.077			1		-99		-99	1	0	0	1	0									0	0	0.1	0	0	0.4	0.2	0	0	0	0	0	0.625
Norway	NOR	2015	80		61.2188				0.8	1			0.626833	0.582	0.6875	0.5835		1	1		1		1	1	1	0	1	1	1								0.571	0.778	0.737	0.7	0.375	0.6	0.6	0.667	0.625	0.5	0.6	0.5	0.875
Oman	OMN	2015	70		41.9				0.7				0.507833	0.357667	0.3335	0.422		0.4	0.5		-99		-99	1	1	0	1	0.5									0	0.7	0.842	0.455	0.25	0.8	0.8	0.25	0.429	0.167	0	0.5	0.667
Pakistan	PAK	2015	80		63.2625				0.8		0.165		0.682833	0.573667	0.6945	0.597		0.6	0	0.318	-99		-99	1	1	0	1	1		0	0	0	0.825	0	0.165		0.857	0.889	0.737	0.364	0.25	1	0.8	0.417	0.625	0.6	0.5	0.5	0.889
Palau	PLW	2015	10		42.6688				0.1				0.3855	0.414333	0.625	0.389		0.2	1		-99		-99	0	0	0	0.5	0									0.429	0.286	0.55	0.273	0.375	0.4	0.8	0.231	0.222	0.333	0.4	0.5	0.75
Panama	PAN	2015	80		68.7				0.8		0.3		0.7315	0.6375	0.6945	0.6945		0.466	1	0.469	-99		-99	1	1	0	1	1		0.542	0	0	0.958	0	0.3		0.857	0.667	0.895	0.545	0.625	0.8	0.8	0.75	0.625	0.4	0.75	0.5	0.889
Papua New Guinea	PNG	2015	10		44.5375				0.1		0.044		0.366833	0.398667	0.6945	0.572		0.134	0	0.213	-99		-99	0	0	0	0.5	0		0.048	0.048	0	0.123	0	0.044		0.429	0.286	0.579	0.182	0.125	0.6	0.8	0.167	0.125	0.4	0.4	0.5	0.889
Paraguay	PRY	2015	50		64.7375				0.5		0.075		0.697	0.559333	0.6945	0.7155		0.532	0	0.251	-99		-99	1	0	0	1	0.5		0.075	0	0	0.299	0	0.075		0.857	0.778	0.842	0.455	0.25	1	0.8	0.5	0.556	0.5	0.5	0.5	0.889
Peru	PER	2015	70		67.8937				0.7		0.39		0.7095	0.633333	0.6875	0.7155		0.868	0	0.331	-99		-99	1	1	0	1	0.5		0.898	0.054	0	1	0	0.39		0.857	0.8	0.895	0.455	0.25	1	0.8	0.75	0.5	0.5	0.5	0.75	0.875
Philippines	PHL	2015	80		68.0625				0.8		0.286		0.685333	0.641167	0.6945	0.771		1	1	0.412	-99		-99	1	1	0	1	1		0.251	0.09	0.09	0.5	0.5	0.286		0.714	0.889	0.895	0.364	0.25	1	0.8	0.583	0.714	0.75	0.5	0.5	0.889
Poland	POL	2015	80		63.375				0.8	1			0.675167	0.591167	0.6945	0.5765		0.934	1		1		1	1	1	0	1	1	1								0.714	0.8	0.737	0.7	0.5	0.6	0.6	0.583	0.714	0.75	0.4	0.5	0.889
Portugal	PRT	2015	80		59.4125				0.8	1			0.618	0.5635	0.6875	0.521		0.934	1		1		1	1	1	0	1	1	1								0.571	0.7	0.737	0.6	0.5	0.6	0.6	0.667	0.714	0.5	0.4	0.5	0.875
Puerto Rico	PRI	2015	60		21.1313				0.6				0.171667	0.204333	0.3125	0.25			1		-99		-99	1	0	0	1	1									0	0.143	0.105	0.182	0	0.6	0.6	0.154	0.222	0	0	0.25	0.625
Qatar	QAT	2015	80		48.15				0.8				0.456167	0.483333	0.5	0.5335		0.668	1		-99		-99	1	1	0	1	1									0.143	0.25	0.789	0.455	0.5	0.6	0.8	0.333	0.5	0.167	0.6	0.5	0.5
Romania	ROU	2015	80		57.1125				0.8		0.376		0.608333	0.525667	0.5835	0.5835		0.934	1	0.303	-99		-99	1	1	0	1	1		0.896	0	0.024	0.958	0	0.376		0.857	0.556	0.737	0.4	0.5	0.6	0.6	0.583	0.571	0.5	0.4	0.5	0.667
Russian Federation	RUS	2015	80		55.2062				0.8		0.485		0.565167	0.497167	0.5835	0.646		0.668	1	0.399	-99		-99	1	1	0	1	1		0.527	0.47	0.47	0.958	0	0.485		0.571	0.556	0.789	0.5	0.375	0.6	0.6	0.583	0.5	0.4	0.4	0.5	0.667
Rwanda	RWA	2015	70		54.0125				0.7		0.707		0.634667	0.429667	0.4445	0.6835		0.8	0	0.164	-99		-99	1	1	0	1	0.5		0.922	0.306	0.306	1	1	0.707		0.429	0.778	0.737	0.364	0.5	1	0.8	0.417	0.111	0.5	0.25	0.5	0.889
Samoa	WSM	2015	70		56.1375				0.7		0.093		0.600667	0.461167	0.6945	0.611		0.398	0	0.088	-99		-99	0.5	1	0	1	1		0	0	0	0.433	0.033	0.093		0.714	0.667	0.684	0.364	0.375	0.8	0.8	0.417	0.25	0.4	0.4	0.5	0.889
San Marino	SMR	2015	40		18.7				0.4				0.205333	0.130167	0.222	0.2675			1		-99		-99	1	0	0	1	0									0	0.125	0.4	0.182	0.125	0.4	0.2	0.077	0.111	0.143	0	0.25	0.444
Sao Tome and Principe	STP	2015	40		45.2188				0.4		0.04		0.468333	0.332333	0.4445	0.771		0.266	0	0.049	-99		-99	0	1	0	1	0		0.068	0	0.068	0.065	0	0.04		0.143	0.5	0.737	0.455	0.375	0.6	0.8	0.25	0.111	0.333	0	0.5	0.889
Saudi Arabia	SAU	2015	60		44.1875				0.6		0.309		0.356	0.535333	0.5835	0.2775		0.534	0	0.193	-99		-99	1	0	0	1	1		0.557	0	0.414	0.152	0.422	0.309		0.143	0.333	0.737	0.273	0.25	0.4	0.8	0.333	0.429	0.4	0.75	0.5	0.667
Senegal	SEN	2015	70		62.95				0.7		0.284		0.670667	0.554167	0.6945	0.667		0.8	0	0.328	-99		-99	0.5	1	0	1	1		0.232	0.113	0.113	0.497	0.467	0.284		0.857	0.8	0.737	0.455	0.375	0.8	0.8	0.5	0.625	0.4	0.5	0.5	0.889
Serbia	SRB	2015	80		66.7938				0.8		0.572		0.795	0.5065	0.6945	0.7445		0.6	1	0.101	-99		-99	1	1	0	1	1		0.713	0.689	0.689	0.767	0	0.572		0.857	0.9	0.842	0.6	0.571	1	0.6	0.583	0.556	0.4	0.4	0.5	0.889
Seychelles	SYC	2015	40		52.4438				0.4				0.553167	0.414833	0.6945	0.597		0.4	1		-99		-99	0	1	0	1	0									0.857	0.75	0.789	0.273	0.25	0.4	0.8	0.167	0.222	0.4	0.4	0.5	0.889
Sierra Leone	SLE	2015	70		59.6938				0.7		0.136		0.697167	0.4725	0.6945	0.572		0.466	0	0.198	-99		-99	0.5	1	0	1	1		0	0	0	0.679	0	0.136		0.857	0.778	0.684	0.364	0.5	1	0.8	0.385	0.25	0.4	0.5	0.5	0.889
Singapore	SGP	2015	80		39.3312				0.8	1			0.393667	0.416667	0.25	0.4655		0.668	1		1		1	1	1	0	1	1	1								0	0.375	0.737	0.4	0.25	0.6	0.8	0.333	0.5	0.167	0.2	0.5	0.5
Sint Maarten (Dutch part)	SXM	2015	20		9.2875				0.2				0.072	0.0795	0.25	0.0385			1		-99		-99	1	0	0	0	0									0	0	0.05	0.182	0	0.2	0.4	0.077	0	0	0	0	0.5
Slovak Republic	SVK	2015	70		59.125				0.7	1			0.621	0.532	0.6945	0.5765		0.934	1		1		1	1	1	0	0.5	1	1								0.714	0.6	0.737	0.7	0.375	0.6	0.6	0.667	0.625	0.6	0.2	0.5	0.889
Slovenia	SVN	2015	80		66.4688				0.8	1			0.668667	0.596833	0.9445	0.5765		0.934	1		1		1	1	1	0	1	1	1								1	0.7	0.737	0.6	0.375	0.6	0.6	0.667	0.714	0.5	0.6	0.5	0.889
Solomon Islands	SLB	2015	50		53.7062				0.5		0.099		0.542833	0.4425	0.6875	0.653		0.266	0	0.14	-99		-99	0	1	0	1	0.5		0.111	0	0	0.385	0	0.099		0.714	0.667	0.737	0.364	0.375	0.4	0.8	0.333	0.222	0.4	0.4	0.5	0.875
Somalia	SOM	2015	0		31.5437				0				0.301333	0.307	0.4375	0.261		0.066	0		-99		-99	0	0	0	0	0									0.143	0.375	0.474	0.091	0.125	0.6	0.6	0.231	0.111	0.4	0	0.5	0.875
South Africa	ZAF	2015	80		73.9875				0.8		0.274		0.71	0.709667	0.9445	0.7155		0.8	1	0.297	-99		-99	1	1	0	1	1		0.245	0	0	0.646	0.476	0.274		0.857	1	0.789	0.364	0.25	1	0.8	0.583	0.625	0.5	1	0.75	0.889
South Sudan	SSD	2015	20		34.9438				0.2		0.288		0.371167	0.329167	0.4445	0.25		0.198	0	0.276	-99		-99	0	0	0	1	0		0.287	0.239	0.239	0.673	0	0.288		0.286	0.375	0.368	0.273	0.125	0.8	0.8	0.167	0.222	0.286	0	0.5	0.889
Spain	ESP	2015	80		64.8875				0.8	1			0.628833	0.615333	0.9375	0.521		1	1		1		1	1	1	0	1	1	1								0.714	0.7	0.684	0.7	0.375	0.6	0.6	0.667	0.625	0.5	0.8	0.5	0.875
Sri Lanka	LKA	2015	70		68.225				0.7		0.309		0.676667	0.570833	0.9445	0.771		0.534	1	0.255	-99		-99	0.5	1	0	1	1		0.371	0.35	0.302	0.521	0	0.309		0.857	1	0.789	0.364	0.25	0.8	0.8	0.5	0.625	0.4	0.6	0.5	0.889
St. Kitts and Nevis	KNA	2015	0		42.575				0				0.3545	0.3735	0.625	0.597		0.066	1		-99		-99	0	0	0	0	0									0.429	0.25	0.45	0.273	0.125	0.6	0.8	0.083	0.125	0.333	0.4	0.5	0.75
St. Lucia	LCA	2015	60		56.225				0.6		0.114		0.5095	0.501333	0.6945	0.771		0.468	1	0.245	-99		-99	0	1	0	1	1		0.177	0	0	0.392	0	0.114		0.429	0.625	0.789	0.364	0.25	0.6	0.8	0.25	0.125	0.333	0.75	0.75	0.889
St. Martin (French part)	MAF	2015	20		4.89375				0.2				0	0.075	0.125	0.0415			0		-99		-99	1	0	0	0	0									0	0	0	0	0	0	0.2	0	0	0	0	0.25	0.25
St. Vincent and the Grenadines	VCT	2015	20		47.95				0.2		0.202		0.458333	0.3875	0.6945	0.604		0.132	1	0.097	-99		-99	0	0	0	1	0		0.335	0	0	0.675	0	0.202		0.571	0.444	0.737	0.273	0.125	0.6	0.8	0.167	0.125	0.333	0.4	0.5	0.889
Sudan	SDN	2015	60		63.5375				0.6		0.417		0.614167	0.543	0.9445	0.667		0.4	0	0.261	-99		-99	0	1	0	1	1		0.483	0	0.298	0.858	0.446	0.417		0.714	0.8	0.632	0.364	0.375	0.8	0.8	0.5	0.375	0.333	0.75	0.5	0.889
Suriname	SUR	2015	40		41				0.4				0.4165	0.373667	0.4375	0.472		0.266	1		-99		-99	0	1	0	0.5	0.5									0.143	0.444	0.789	0.273	0.25	0.6	0.8	0.167	0.375	0.4	0	0.5	0.875
Sweden	SWE	2015	80		65.4188				0.8	1			0.6315	0.5875	0.9445	0.632		0.732	1		1		1	1	1	0	1	1	1								0.857	0.6	0.632	0.6	0.5	0.6	0.6	0.667	0.625	0.333	0.8	0.5	0.889
Switzerland	CHE	2015	80		66.8312				0.8	1			0.64	0.632833	0.9445	0.5835		0.934	1		1		1	1	1	0	1	1	1								1	0.778	0.632	0.455	0.375	0.6	0.6	0.583	0.714	0.6	0.8	0.5	0.889
Syrian Arab Republic	SYR	2015	20		37.8875				0.2				0.3345	0.414833	0.4445	0.3385		0.534	0		-99		-99	0	0	0	0	1									0	0.286	0.632	0.364	0.125	0.6	0.8	0.231	0.625	0.333	0	0.5	0.889
Taiwan, China	TWN	2015	40						0.4												-99		-99	1	0	0	0	1
Tajikistan	TJK	2015	50		49.4813				0.5		0.263		0.584667	0.377333	0.4445	0.628		0.534	0.5	0.153	-99		-99	0.5	1	0	1	0		0.564	0	0	0.284	0.467	0.263		0.571	0.625	0.789	0.273	0.25	1	0.8	0.231	0.333	0.4	0	0.5	0.889
Tanzania	TZA	2015	70		71.675				0.7		0.111		0.6775	0.682833	0.9445	0.7085		0.868	0	0.261	-99		-99	0.5	1	0	1	1		0.083	0.083	0.042	0.347	0	0.111		1	0.8	0.526	0.364	0.375	1	0.8	0.583	0.714	0.5	1	0.5	0.889
Thailand	THA	2015	80		74.0187				0.8		0.196		0.769167	0.651333	0.9445	0.7155		0.666	0	0.158	-99		-99	1	1	0	1	1		0.068	0	0.021	0.446	0.446	0.196		0.857	1	0.842	0.545	0.571	0.8	0.8	0.583	0.625	0.4	1	0.5	0.889
Timor-Leste	TLS	2015	70		55.2625				0.7		0.051		0.558333	0.445333	0.6945	0.7155		0.666	0	0.174	-99		-99	0.5	1	0	1	1		0	0	0	0.254	0	0.051		0.857	0.625	0.579	0.364	0.125	0.8	0.8	0.417	0.222	0.333	0.4	0.5	0.889
Togo	TGO	2015	70		61.1125				0.7		0.34		0.634667	0.5645	0.6945	0.597		0.334	0	0.213	-99		-99	1	1	0	1	0.5		0.425	0.404	0.404	0.467	0	0.34		0.714	0.889	0.632	0.273	0.5	0.8	0.8	0.462	0.625	0.5	0.5	0.5	0.889
Tonga	TON	2015	50		47.4188				0.5				0.446333	0.396333	0.6875	0.578		0.2	0		-99		-99	0.5	1	0	1	0									0.714	0.5	0.632	0.182	0.25	0.4	0.8	0.167	0.111	0.4	0.4	0.5	0.875
Trinidad and Tobago	TTO	2015	40		46.2062				0.4				0.415	0.409667	0.5835	0.639		0.466	1		-99		-99	0	0	0	1	1									0.143	0.667	0.632	0.273	0.375	0.4	0.8	0.333	0.375	0.2	0.25	0.5	0.667
Tunisia	TUN	2015	80		62.1812				0.8		0.622		0.676333	0.559667	0.6945	0.572		0.6	1	0.063	-99		-99	1	1	0	1	1		0.592	0.339	0.38	0.883	0.917	0.622		0.857	0.889	0.789	0.273	0.25	1	0.8	0.333	0.625	0.6	0.5	0.5	0.889
Turkey	TUR	2015	80		78.7687				0.8		0.473		0.740333	0.772167	0.9375	0.8265		0.666	1	0.29	-99		-99	1	1	0	1	1		0.884	0.271	0.337	0.871	0	0.473		1	0.9	0.842	0.6	0.5	0.6	0.8	0.583	0.75	0.75	0.75	1	0.875
Turkmenistan	TKM	2015	20		39.0812				0.2		0.004		0.411333	0.3605	0.4445	0.3665		0.134	0	0.112	-99		-99	0	0	0	1	0		0	0	0	0.021	0	0.004		0.143	0.625	0.684	0.091	0.125	0.8	0.8	0.308	0.222	0.333	0	0.5	0.889
Turks and Caicos Islands	TCA	2015	40		10.8875				0.4				0.00833333	0.1545	0.25	0.1325			0		-99		-99	1	0	0	1	0									0	0	0.05	0	0	0	0.6	0.077	0	0	0	0.25	0.5
Tuvalu	TUV	2015	10		30.8062				0.1				0.297333	0.316333	0.3125	0.311		0.134	0		-99		-99	0	0	0	0.5	0									0.143	0.143	0.5	0.273	0.125	0.6	0.8	0.154	0.111	0.333	0	0.5	0.625
Uganda	UGA	2015	70		63.8438				0.7		0.313		0.668667	0.5685	0.6875	0.7085		0.734	0	0.248	-99		-99	0.5	1	0	1	1		0.277	0	0.096	0.758	0.433	0.313		0.857	0.875	0.632	0.273	0.375	1	0.8	0.417	0.444	0.5	0.75	0.5	0.875
Ukraine	UKR	2015	80		67.425				0.8		0.441		0.674333	0.554167	0.9445	0.764		0.8	1	0.351	-99		-99	1	1	0	1	1		0.437	0.437	0.021	0.829	0.479	0.441		1	0.7	0.789	0.182	0.375	1	0.6	0.5	0.625	0.5	0.6	0.5	0.889
United Arab Emirates	ARE	2015	60		35.5688				0.6				0.368667	0.3715	0.222	0.403		0.134	1		-99		-99	1	1	0	1	0									0.286	0.444	0.684	0.273	0.125	0.4	0.8	0.167	0.429	0.333	0	0.5	0.444
United Kingdom	GBR	2015	80		63.0938				0.8	1			0.607667	0.604833	0.9445	0.4655		0.866	1		1		1	1	1	0	1	1	1								0.714	0.6	0.632	0.6	0.5	0.6	0.6	0.615	0.714	0.4	0.8	0.5	0.889
United States	USA	2015	80		63.1313				0.8	1			0.6185	0.558	0.9375	0.5835		1	1		1		1	1	1	0	1	1	1								0.857	0.778	0.737	0.364	0.375	0.6	0.6	0.615	0.5	0.333	0.8	0.5	0.875
Uruguay	URY	2015	80		63.3375				0.8		0.218		0.716333	0.551333	0.625	0.639		0.6	1	0.279	-99		-99	1	1	0	1	1		0.646	0	0	0.446	0	0.218		0.714	0.889	0.684	0.636	0.625	0.75	0.8	0.583	0.625	0.4	0.4	0.5	0.75
Uzbekistan	UZB	2015	30		45.425				0.3		0.008		0.4535	0.4315	0.4445	0.5345		0.132	1	0.052	-99		-99	0	0	0	1	0.5		0.042	0	0	0	0	0.008		0.286	0.5	0.737	0.273	0.125	0.8	0.8	0.333	0.556	0.4	0	0.5	0.889
Vanuatu	VUT	2015	40		50.8937				0.4		0.064		0.518667	0.410167	0.6945	0.5905		0.334	0	0.279	-99		-99	0	1	0	1	0		0	0	0	0.32	0	0.064		0.571	0.625	0.684	0.182	0.25	0.8	0.8	0.25	0.111	0.4	0.4	0.5	0.889
Venezuela, RB	VEN	2015	60		53.4312				0.6		0.174		0.4855	0.515167	0.6945	0.578		0.4	0.5	0.201	-99		-99	0	1	0	1	1		0.414	0	0.068	0.389	0	0.174		0.571	0.444	0.684	0.364	0.25	0.6	0.8	0.333	0.625	0.333	0.5	0.5	0.889
Vietnam	VNM	2015	80		55.1875				0.8		0.474		0.644333	0.484667	0.4445	0.5835		0.8	0	0.378	-99		-99	1	1	0	1	1		0.604	0.604	0.562	0.599	0	0.474		0.571	0.8	0.684	0.636	0.375	0.8	0.8	0.583	0.625	0.4	0	0.5	0.889
Virgin Islands (U.S.)	VIR	2015	40		8.7125				0.4				0.00833333	0.108333	0.25	0.097			1		-99		-99	1	0	0	1	0									0	0	0.05	0	0	0	0.4	0	0	0	0	0.25	0.5
West Bank and Gaza	PSE	2015	60		59.4875				0.6		0.162		0.619	0.462167	0.9375	0.578		0.934	0	0.227	-99		-99	1	0	0	1	1		0.246	0	0	0.563	0	0.162		0.857	0.625	0.421	0.636	0.375	0.8	0.6	0.462	0.444	0.167	0.6	0.5	0.875
Yemen, Rep.	YEM	2015	70		51.9062				0.7		0.281		0.573167	0.451667	0.4445	0.6335		0.534	0	0.251	-99		-99	0.5	1	0	1	1		0.898	0	0.228	0.279	0	0.281		0.571	0.429	0.684	0.455	0.5	0.8	0.8	0.385	0.375	0.4	0.25	0.5	0.889
Zambia	ZMB	2015	80		67.2125				0.8		0.054		0.659167	0.619333	0.9445	0.597		0.734	0	0.237	-99		-99	1	1	0	1	1		0	0	0	0.245	0.024	0.054		1	0.875	0.632	0.273	0.375	0.8	0.8	0.333	0.333	0.75	1	0.5	0.889
Zimbabwe	ZWE	2015	60		52.5312				0.6		0.053		0.596333	0.482333	0.4445	0.522		0.668	0	0.324	-99		-99	0	1	0	1	1		0	0	0	0.263	0	0.053		0.571	0.75	0.684	0.273	0.5	0.8	0.8	0.5	0.444	0.4	0.25	0.5	0.889
Afghanistan	AFG	2014	30		49.3125				0.3				0.5325	0.439833	0.4445	0.5835		0.4			-99		-99	0	1	0	0	0.5									0.5	0.75	0.706	0.364	0.125	0.75	0.933	0.417	0.222	0.4	0	0.667	0.889
Albania	ALB	2014	50		67.5375				0.5				0.651333	0.605667	0.9445	0.6875		0.534			-99		-99	0.5	1	0	0	1									1	0.556	0.722	0.455	0.375	0.8	0.8	0.667	0.333	0.667	0.5	0.667	0.889
Algeria	DZA	2014	40		55.8312				0.4				0.606	0.509667	0.4445	0.675		0.266			-99		-99	0	1	0	0	1									0.667	0.5	0.824	0.545	0.5	0.6	0.933	0.583	0.375	0.5	0	0.667	0.889
American Samoa	ASM	2014	20		12.6062				0.2				0.0841667	0.122167	0.3125	0.077					-99		-99	1	0	0	0	0									0	0	0.105	0	0	0.4	0.4	0	0	0	0	0.333	0.625
Andorra	AND	2014	20		22.3625				0.2				0.219667	0.146167	0.3335	0.358		0.4			-99		-99	1	0	0	0	0									0.167	0	0.444	0.182	0.125	0.4	0.6	0.077	0	0.2	0	0	0.667
Angola	AGO	2014	20		66.4125				0.2				0.502	0.725	0.9445	0.6875		0.468			-99		-99	0	0	0	0	1									0.667	0.375	0.556	0.364	0.25	0.8	0.933	0.583	0.5	0.667	1	0.667	0.889
Antigua and Barbuda	ATG	2014	0		56.8125				0				0.445333	0.5905	0.875	0.5625		0.2			-99		-99	0	0	0	0	0									0.5	0.286	0.706	0.455	0.125	0.6	1	0.25	0.143	0.4	0.75	1	0.75
Argentina	ARG	2014	40		79.2062				0.4				0.709333	0.8125	0.9445	0.8265		0.732			-99		-99	0	1	0	0	1									1	0.556	0.889	0.636	0.375	0.8	1	0.75	0.625	0.5	1	1	0.889
Armenia	ARM	2014	60		64.3312				0.6				0.6895	0.627833	0.4445	0.75		0.6			-99		-99	1	1	0	0	1									0.667	0.75	1	0.545	0.375	0.8	0.933	0.667	0.5	0.667	0	1	0.889
Aruba	ABW	2014	20		17.925				0.2				0.1115	0.201667	0.25	0.2445					-99		-99	1	0	0	0	0									0	0	0.105	0.364	0	0.2	0.8	0.077	0	0	0	0.333	0.5
Australia	AUS	2014	60		64.6188				0.6	1			0.643167	0.600833	0.9375	0.5		1			1		1	1	1	0	0	1	1								0.833	0.625	0.824	0.727	0.25	0.6	0.8	0.667	0.571	0.4	0.5	0.667	0.875
Austria	AUT	2014	60		62.8563				0.6	1			0.575167	0.6195	0.9445	0.5		0.934			1		1	1	1	0	0	1	1								0.667	0.444	0.765	0.6	0.375	0.6	0.8	0.75	0.5	0.5	0.5	0.667	0.889
Azerbaijan	AZE	2014	40		58.0812				0.4				0.668667	0.502833	0.4445	0.6875		0.4			-99		-99	0	1	0	0	1									0.5	0.75	0.833	0.5	0.429	1	0.933	0.417	0.5	0.5	0	0.667	0.889
Bahamas, The	BHS	2014	60		34.7062				0.6				0.301833	0.373667	0.25	0.5		0.066			-99		-99	1	1	0	0	1									0.167	0.143	0.778	0.273	0.25	0.2	1	0.25	0.125	0.2	0	0.667	0.5
Bahrain	BHR	2014	50		37.5875				0.5				0.360667	0.445833	0.25	0.3375		0.266			-99		-99	1	1	0	0	0.5									0.167	0.143	0.765	0.364	0.125	0.6	1	0.308	0.5	0.2	0	0.667	0.5
Bangladesh	BGD	2014	50		63.0125				0.5				0.723833	0.579167	0.4445	0.6875		0.732			-99		-99	0.5	1	0	0	1									0.667	0.75	0.824	0.727	0.375	1	0.933	0.667	0.375	0.5	0.333	0.667	0.889
Barbados	BRB	2014	60		61.9438				0.6				0.585167	0.525	0.875	0.75		0.134			-99		-99	1	1	0	0	1									0.667	0.5	0.824	0.545	0.375	0.6	1	0.333	0.25	0.4	0.5	0.667	0.75
Belarus	BLR	2014	40		55.0688				0.4				0.606	0.508333	0.375	0.6875		0.334			-99		-99	1	1	0	0	0									0.667	0.5	0.889	0.455	0.125	1	0.8	0.583	0.333	0.667	0	0.667	0.75
Belgium	BEL	2014	60		54.725				0.6	1			0.610333	0.534167	0.4445	0.5		0.8			1		1	1	1	0	0	1	1								0.5	0.556	0.706	0.8	0.5	0.6	0.8	0.667	0.571	0.5	0	0.667	0.889
Belize	BLZ	2014	40		64.8312				0.4				0.573667	0.611167	0.9445	0.6875		0.534			-99		-99	0	1	0	0	1									0.667	0.5	0.889	0.636	0.25	0.5	0.933	0.667	0.25	0.4	0.75	0.667	0.889
Benin	BEN	2014	30		54.4438				0.3				0.5945	0.5485	0.389	0.5375		0.6			-99		-99	0	1	0	0	0.5									0.5	0.625	0.722	0.545	0.375	0.8	0.933	0.583	0.375	0.4	0.333	0.667	0.778
Bermuda	BMU	2014	20		17.4438				0.2				0.129667	0.185833	0.25	0.199					-99		-99	1	0	0	0	0									0	0	0.105	0.273	0	0.4	0.6	0.154	0.111	0	0.25	0	0.5
Bhutan	BTN	2014	50		67.425				0.5				0.717	0.578667	0.9445	0.5625		0.534			-99		-99	0.5	1	0	0	1									1	0.75	0.722	0.455	0.375	1	0.933	0.5	0.222	0.4	0.75	0.667	0.889
Bolivia	BOL	2014	50		71.1437				0.5				0.7105	0.674167	0.9375	0.6		0.6			-99		-99	1	1	0	0	0.5									1	0.778	0.833	0.727	0.125	0.8	0.933	0.667	0.444	0.667	0.667	0.667	0.875
Bosnia and Herzegovina	BIH	2014	50		59.2062				0.5				0.635167	0.5455	0.4445	0.75		0.6			-99		-99	0.5	1	0	0	1									0.667	0.625	0.889	0.455	0.375	0.8	0.8	0.583	0.556	0.667	0	0.667	0.889
Botswana	BWA	2014	20		62.8813				0.2				0.576833	0.576833	0.9445	0.625		0.602			-99		-99	0.5	0	0	0	0.5									0.333	0.556	0.722	0.6	0.25	1	0.933	0.417	0.444	0.5	0.5	0.667	0.889
Brazil	BRA	2014	50		77.2875				0.5				0.711	0.829167	0.9375	0.625		0.534			-99		-99	1	1	0	0	0.5									0.833	0.625	0.833	0.6	0.375	1	0.933	0.75	0.625	0.667	1	1	0.875
British Virgin Islands	VGB	2014	20		15.75				0.2				0.102833	0.2035	0.25	0.091					-99		-99	1	0	0	0	0									0	0	0.053	0.364	0	0.2	0.4	0.154	0	0	0	0.667	0.5
Brunei Darussalam	BRN	2014	60		36.8				0.6				0.299333	0.458333	0.3335	0.3375		0.268			-99		-99	1	1	0	0	1									0.167	0.125	0.765	0.364	0.125	0.25	1	0.583	0.25	0.25	0	0.667	0.667
Bulgaria	BGR	2014	60		64.7875				0.6				0.629667	0.611833	0.8335	0.625		0.934			-99		-99	1	1	0	0	1									0.833	0.667	0.778	0.4	0.5	0.6	0.6	0.583	0.571	0.5	0.75	0.667	0.667
Burkina Faso	BFA	2014	30		68.0375				0.3				0.7195	0.574	0.9375	0.625		0.8			-99		-99	0	1	0	0	0.5									1	0.625	0.722	0.545	0.625	0.8	0.933	0.5	0.444	0.4	0.5	0.667	0.875
Burundi	BDI	2014	40		55.9937				0.4				0.6405	0.502667	0.4375	0.6125		0.532			-99		-99	0.5	1	0	0	0.5									0.667	0.625	0.722	0.6	0.429	0.8	0.933	0.583	0.333	0.5	0	0.667	0.875
Cabo Verde	CPV	2014	30		59.6875				0.3				0.4755	0.572167	0.9445	0.6875		0.398			-99		-99	0	1	0	0	0.5									0.5	0.375	0.889	0.364	0.125	0.6	0.933	0.25	0.333	0.5	0.75	0.667	0.889
Cambodia	KHM	2014	40		70.775				0.4				0.736333	0.607	0.9445	0.6875		0.734			-99		-99	0	1	0	0	1									0.833	0.5	0.824	0.636	0.625	1	0.933	0.667	0.375	0.5	0.5	0.667	0.889
Cameroon	CMR	2014	40		72.65				0.4				0.741833	0.634833	0.9445	0.7375		0.6			-99		-99	0.5	1	0	0	0.5									1	0.5	0.765	0.636	0.75	0.8	0.933	0.667	0.375	0.5	0.667	0.667	0.889
Canada	CAN	2014	60		50.5688				0.6	1			0.5325	0.5035	0.4375	0.5		1			1		1	1	1	0	0	1	1								0.5	0.5	0.765	0.455	0.375	0.6	0.8	0.583	0.571	0.4	0	0.667	0.875
Cayman Islands	CYM	2014	20		16.0063				0.2				0.0876667	0.201667	0.25	0.1625					-99		-99	1	0	0	0	0									0	0	0.053	0.273	0	0.2	0.8	0.077	0	0	0	0.333	0.5
Central African Republic	CAF	2014	0		44.4937				0				0.505167	0.368333	0.4445	0.4945		0.2			-99		-99	0	0	0	0	0									0.167	0.714	0.611	0.364	0.375	0.8	0.933	0.333	0.111	0.5	0	0.333	0.889
Chad	TCD	2014	30		43.2938				0.3				0.529667	0.368333	0.4445	0.325		0.334			-99		-99	0.5	1	0	0	0									0.667	0.5	0.722	0.364	0.125	0.8	0.933	0.333	0.111	0.5	0	0.333	0.889
Channel Islands	CHI	2014	20						0.2												-99		-99	1	0	0	0	0
Chile	CHL	2014	60		69.1437				0.6	1			0.719333	0.601333	0.9445	0.625		0.532			1		1	1	1	0	0	1	1								1	0.778	0.833	0.455	0.25	1	1	0.75	0.625	0.4	0.5	0.333	0.889
China	CHN	2014	50		50.7313				0.5				0.5245	0.471833	0.4445	0.625		0.4			-99		-99	1	1	0	0	0.5									0.667	0.667	0.706	0.182	0.125	0.8	0.933	0.231	0.5	0.5	0	0.667	0.889
Colombia	COL	2014	60		75.1312				0.6				0.7575	0.704333	0.9375	0.6875		1			-99		-99	1	1	0	0	1									1	0.75	1	0.545	0.25	1	0.933	0.667	0.625	0.667	0.667	0.667	0.875
Comoros	COM	2014	20		58.65				0.2				0.573	0.495167	0.9375	0.55		0.4			-99		-99	0	0	0	0	1									0.833	0.429	0.778	0.273	0.625	0.5	0.933	0.583	0.222	0.4	0.5	0.333	0.875
Congo, Dem. Rep.	COD	2014	50		52.4312				0.5				0.6315	0.402667	0.4445	0.6475		0.668			-99		-99	0.5	1	0	0	1									0.667	0.571	0.706	0.545	0.5	0.8	0.933	0.5	0.25	0.4	0	0.333	0.889
Congo, Rep.	COG	2014	50		49.4188				0.5				0.619833	0.387333	0.4445	0.4875		0.4			-99		-99	0.5	1	0	0	1									0.667	0.625	0.722	0.455	0.25	1	0.933	0.308	0.25	0.5	0	0.333	0.889
Costa Rica	CRI	2014	60		73.6063				0.6				0.751833	0.606833	0.9375	0.875		0.6			-99		-99	1	1	0	0	1									1	0.5	1	0.636	0.375	1	0.933	0.75	0.625	0.5	0.5	0.333	0.875
Cote d'Ivoire	CIV	2014	30		64.7938				0.3				0.655667	0.565167	0.9445	0.5765		0.466			-99		-99	0	1	0	0	0.5									0.667	0.625	0.722	0.545	0.375	1	0.933	0.583	0.375	0.5	0.667	0.333	0.889
Croatia	HRV	2014	60		53.3375				0.6				0.605167	0.502333	0.4445	0.5		0.866			-99		-99	1	1	0	0	1									0.667	0.556	0.833	0.4	0.375	0.8	0.8	0.5	0.714	0.667	0	0.333	0.889
Cuba	CUB	2014	60		50.15				0.6				0.534167	0.454167	0.4445	0.6025					-99		-99	1	1	0	0	1									0.167	0.375	0.889	0.545	0.429	0.8	0.6	0.308	0.5	0.4	0.25	0.667	0.889
Curacao	CUW	2014	20		15.3812				0.2				0.066	0.233	0.25	0.0835					-99		-99	1	0	0	0	0									0	0	0.105	0.091	0	0.2	0.8	0.154	0.111	0	0	0.333	0.5
Cyprus	CYP	2014	40		55.5187				0.4				0.534667	0.522167	0.8335	0.4375		0.934			-99		-99	1	0	0	0	1									0.667	0.444	0.722	0.4	0.375	0.6	0.8	0.5	0.5	0.5	0.5	0.333	0.667
Czech Republic	CZE	2014	60		52.725				0.6	1			0.603667	0.466667	0.4445	0.5625		0.934			1		1	1	1	0	0	1	1								0.667	0.556	0.824	0.6	0.375	0.6	0.8	0.667	0.5	0.5	0	0.333	0.889
Denmark	DNK	2014	60		49.6688				0.6	1			0.566167	0.466667	0.375	0.5		0.8			1		1	1	1	0	0	1	1								0.5	0.444	0.778	0.7	0.375	0.6	0.8	0.667	0.5	0.5	0	0.333	0.75
Djibouti	DJI	2014	0		53.8875				0				0.552333	0.4235	0.8335	0.55		0.268			-99		-99	0	0	0	0	0									0.833	0.429	0.722	0.455	0.375	0.5	0.933	0.25	0.125	0.4	0.5	0.333	0.667
Dominica	DMA	2014	20		50.4688				0.2				0.432833	0.3875	0.889	0.6875		0.2			-99		-99	0	1	0	0	0									0.667	0.25	0.5	0.455	0.125	0.6	0.8	0.167	0.125	0.4	0.5	0.333	0.778
Dominican Republic	DOM	2014	60		60.375				0.6				0.695333	0.454	0.4445	0.9375		0.6			-99		-99	1	1	0	0	1									0.667	0.625	0.944	0.636	0.5	0.8	0.933	0.583	0.375	0.5	0	0.333	0.889
Ecuador	ECU	2014	60		74.4875				0.6				0.776667	0.676333	0.9375	0.6625		0.8			-99		-99	1	1	0	0	1									1	0.75	0.941	0.455	0.714	0.8	0.933	0.583	0.625	0.5	0.75	0.667	0.875
Egypt, Arab Rep.	EGY	2014	60		75.5				0.6				0.7375	0.690167	0.9445	0.8125		0.6			-99		-99	1	1	0	0	1									1	0.75	1	0.5	0.375	0.8	0.933	0.75	0.625	0.5	1	0.333	0.889
El Salvador	SLV	2014	50		75.8688				0.5				0.795833	0.641667	0.9445	0.8125		0.334			-99		-99	1	1	0	0	0.5									1	0.625	0.889	0.636	0.625	1	0.933	0.583	0.5	0.667	0.5	0.667	0.889
Equatorial Guinea	GNQ	2014	20		51.8				0.2				0.504	0.4375	0.9445	0.375		0.132			-99		-99	0	1	0	0	0									0.5	0.429	0.556	0.364	0.375	0.8	1	0.167	0.125	0.5	0.5	0.333	0.889
Eritrea	ERI	2014	20		39.95				0.2				0.490667	0.334833	0.4445	0.275		0			-99		-99	0	1	0	0	0									0.167	0.571	0.667	0.364	0.375	0.8	0.8	0.154	0.222	0.5	0	0.333	0.889
Estonia	EST	2014	60		63.175				0.6	1			0.720167	0.547833	0.75	0.5		0.934			1		1	1	1	0	0	1	1								1	0.556	0.765	0.7	0.5	0.8	0.8	0.583	0.571	0.5	0.5	0.333	0.5
Eswatini	SWZ	2014	20		58.525				0.2				0.6145	0.4295	0.9375	0.6125		0.266			-99		-99	0	1	0	0	0									0.667	0.75	0.765	0.455	0.25	0.8	0.8	0.333	0.111	0.5	0.5	0.333	0.875
Ethiopia	ETH	2014	50		70.3312				0.5				0.7425	0.630667	0.9445	0.5625		1			-99		-99	0.5	1	0	0	1									1	0.778	0.722	0.455	0.5	1	0.933	0.462	0.556	0.5	1	0.333	0.889
Faroe Islands	FRO	2014	20		8.34375				0.2				0.0421667	0.0666667	0.25	0.091					-99		-99	1	0	0	0	0									0	0	0.053	0	0	0.2	0.4	0	0	0	0	0	0.5
Fiji	FJI	2014	50		59.2				0.5				0.566667	0.488833	0.9445	0.625		0.4			-99		-99	0.5	1	0	0	1									0.833	0.375	0.778	0.364	0.25	0.8	0.933	0.417	0.25	0.5	0.5	0.333	0.889
Finland	FIN	2014	60		62.6812				0.6	1			0.659	0.533333	0.9375	0.5		0.732			1		1	1	1	0	0	1	1								0.833	0.556	0.765	0.7	0.5	0.6	0.8	0.667	0.5	0.4	0.5	0.333	0.875
France	FRA	2014	60		49.05				0.6	1			0.584833	0.45	0.4445	0.375		0.934			1		1	1	1	0	0	1	1								0.5	0.444	0.765	0.7	0.5	0.6	0.8	0.667	0.5	0.4	0	0.333	0.889
French Polynesia	PYF	2014	30		12.9062				0.3				0.0383333	0.168333	0.3125	0.1					-99		-99	1	0	0	0	0.5									0	0.125	0.105	0	0	0	0.6	0.077	0	0	0	0.333	0.625
Gabon	GAB	2014	20		46.4375				0.2				0.487667	0.400167	0.389	0.6625		0.198			-99		-99	0	0	0	0	1									0.333	0.5	0.611	0.182	0.5	0.8	0.933	0.385	0.25	0.5	0	0.333	0.778
Gambia, The	GMB	2014	20		62.3188				0.2				0.638	0.553	0.875	0.5375		0.6			-99		-99	0	1	0	0	0									0.833	0.5	0.722	0.273	0.5	1	0.933	0.385	0.5	0.667	0.5	0.333	0.75
Georgia	GEO	2014	50		56.0063				0.5				0.5995	0.495833	0.4445	0.75		0.6			-99		-99	1	1	0	0	0.5									0.667	0.5	0.941	0.364	0.125	1	0.933	0.417	0.625	0.667	0	0.333	0.889
Germany	DEU	2014	60		50.2563				0.6	1			0.561	0.466667	0.4375	0.5		0.866			1		1	1	1	0	0	1	1								0.5	0.444	0.722	0.6	0.5	0.6	0.8	0.667	0.5	0.5	0	0.333	0.875
Ghana	GHA	2014	40		68.7313				0.4				0.718	0.558333	0.9445	0.725		0.466			-99		-99	0.5	1	0	0	0.5									1	0.5	0.706	0.727	0.375	1	0.933	0.417	0.5	0.5	0.667	0.333	0.889
Gibraltar	GIB	2014	20		7.7375				0.2				0.0666667	0.0851667	0.125	0.0385					-99		-99	1	0	0	0	0									0	0	0	0	0	0.4	0.4	0	0.111	0	0	0	0.25
Greece	GRC	2014	60		51.175				0.6	1			0.546333	0.5035	0.4445	0.5		0.934			1		1	1	1	0	0	1	1								0.5	0.556	0.722	0.4	0.5	0.6	0.8	0.667	0.571	0.4	0.25	0.333	0.889
Greenland	GRL	2014	20		10.6125				0.2				0.0841667	0.0795	0.3125	0.0455					-99		-99	1	0	0	0	0									0	0	0.105	0	0	0.4	0.4	0.077	0	0	0	0	0.625
Grenada	GRD	2014	20		54.6187				0.2				0.5	0.4125	0.9445	0.6875		0.2			-99		-99	0	1	0	0	0									0.667	0.286	0.667	0.455	0.125	0.8	0.867	0.25	0.125	0.4	0.5	0.333	0.889
Guam	GUM	2014	40		13.1562				0.4				0.0841667	0.1555	0.25	0.0835					-99		-99	1	0	0	0	1									0	0	0.105	0	0	0.4	0.6	0	0	0	0	0.333	0.5
Guatemala	GTM	2014	50		66.4813				0.5				0.602667	0.64	0.9445	0.646		0.668			-99		-99	0.5	1	0	0	1									0.833	0.375	0.778	0.455	0.375	0.8	0.933	0.615	0.625	0.667	0.667	0.333	0.889
Guinea	GIN	2014	30		53.6437				0.3				0.554667	0.381833	0.9445	0.5375		0.268			-99		-99	0.5	1	0	0	0									0.833	0.429	0.611	0.455	0.25	0.75	0.933	0.25	0.125	0.4	0.25	0.333	0.889
Guinea-Bissau	GNB	2014	20		44.05				0.2				0.5285	0.337833	0.375	0.55		0.266			-99		-99	0	1	0	0	0									0.5	0.571	0.611	0.364	0.375	0.75	0.933	0.25	0.111	0.4	0	0.333	0.75
Guyana	GUY	2014	20		60.7062				0.2				0.6105	0.468	0.8335	0.7875		0.2			-99		-99	0	1	0	0	0									0.667	0.75	0.941	0.455	0.25	0.6	0.933	0.25	0.125	0.5	0.667	0.333	0.667
Haiti	HTI	2014	50		47.5562				0.5				0.520167	0.4465	0.4445	0.46		0.268			-99		-99	1	1	0	0	0.5									0.667	0.5	0.722	0.182	0.25	0.8	0.933	0.538	0.375	0.5	0	0.333	0.889
Honduras	HND	2014	50		75.8438				0.5				0.755833	0.6625	0.9375	0.875		0.8			-99		-99	1	1	0	0	0.5									0.833	0.5	0.941	0.636	0.625	1	0.933	0.75	0.375	0.5	0.75	0.667	0.875
Hong Kong SAR, China	HKG	2014	40		27.1438				0.4				0.201667	0.302	0.2855	0.375					-99		-99	1	0	0	0	1									0	0.125	0.105	0.455	0.125	0.4	0.6	0.25	0.429	0.2	0	0.333	0.571
Hungary	HUN	2014	60		50.15				0.6	1			0.598	0.440667	0.3335	0.5625		0.934			1		1	1	1	0	0	1	1								0.667	0.556	0.765	0.5	0.5	0.6	0.8	0.667	0.444	0.4	0	0.333	0.667
Iceland	ISL	2014	40		48.475				0.4	1			0.4745	0.505667	0.4375	0.5		0.666			1		1	1	0	0	0	1	1								0.5	0.375	0.722	0.4	0.25	0.6	0.8	0.667	0.5	0.4	0	0.667	0.875
India	IND	2014	50		58.7563				0.5				0.605833	0.565167	0.4375	0.75		0.866			-99		-99	1	1	0	0	0.5									0.667	0.778	0.667	0.273	0.25	1	0.933	0.667	0.625	0.5	0.333	0.333	0.875
Indonesia	IDN	2014	60		69.0687				0.6				0.663167	0.6555	0.9445	0.625		0.734			-99		-99	1	1	0	0	1									0.833	0.75	0.765	0.545	0.286	0.8	0.933	0.5	0.5	0.667	1	0.333	0.889
Iran, Islamic Rep.	IRN	2014	40		64.9437				0.4				0.699	0.534667	0.9445	0.55		0.4			-99		-99	1	0	0	0	1									0.833	0.5	0.941	0.545	0.375	1	0.933	0.417	0.625	0.4	0.5	0.333	0.889
Iraq	IRQ	2014	40		61.5312				0.4				0.594167	0.587833	0.9445	0.432		0.4			-99		-99	0.5	1	0	0	0.5									0.833	0.5	0.882	0.3	0.25	0.8	0.933	0.417	0.444	0.4	1	0.333	0.889
Ireland	IRL	2014	60		47.0063				0.6	1			0.5235	0.436	0.4445	0.4375		0.8			1		1	1	1	0	0	1	1								0.5	0.444	0.722	0.5	0.375	0.6	0.8	0.583	0.5	0.4	0	0.333	0.889
Isle of Man	IMN	2014	20		8.18125				0.2				0.0611667	0.0945	0.125	0.0625					-99		-99	1	0	0	0	0									0.167	0	0	0	0	0.2	0.4	0	0	0.167	0	0	0.25
Israel	ISR	2014	60		41.5125				0.6	1			0.455667	0.3805	0.3125	0.5		0.4			1		1	1	1	0	0	1	1								0.333	0.429	0.667	0.455	0.25	0.6	0.8	0.583	0.5	0.4	0	0	0.625
Italy	ITA	2014	60		61.2062				0.6	1			0.6055	0.545167	0.9445	0.5		0.866			1		1	1	1	0	0	1	1								0.667	0.444	0.722	0.7	0.5	0.6	0.8	0.667	0.571	0.4	0.5	0.333	0.889
Jamaica	JAM	2014	40		63.6437				0.4				0.612833	0.498667	0.9445	0.8125		0.6			-99		-99	0	1	0	0	1									0.833	0.625	0.824	0.545	0.25	0.6	0.867	0.417	0.375	0.5	0.5	0.333	0.889
Japan	JPN	2014	60		58.025				0.6	1			0.560333	0.5055	0.9445	0.5		0.734			1		1	1	1	0	0	1	1								0.667	0.5	0.765	0.455	0.375	0.6	0.8	0.5	0.5	0.4	0.5	0.333	0.889
Jordan	JOR	2014	50		67.8625				0.5				0.749	0.516667	0.9445	0.6875		0.6			-99		-99	0.5	1	0	0	1									1	0.75	0.824	0.545	0.375	1	0.933	0.417	0.25	0.5	0.667	0.333	0.889
Kazakhstan	KAZ	2014	60		69.875				0.6				0.724	0.595333	0.9445	0.6875		0.6			-99		-99	1	1	0	0	1									1	0.625	0.889	0.455	0.375	1	0.933	0.583	0.556	0.667	0.5	0.333	0.889
Kenya	KEN	2014	20		67.9562				0.2				0.6405	0.586	0.9445	0.8125		0.534			-99		-99	0	1	0	0	0									0.5	0.778	0.667	0.273	0.625	1	0.933	0.25	0.5	0.5	1	0.333	0.889
Kiribati	KIR	2014	20		37.3125				0.2				0.360667	0.3635	0.375	0.4375		0.266			-99		-99	0	1	0	0	0									0.167	0.25	0.824	0.273	0.25	0.4	0.933	0.154	0.111	0.4	0.25	0.333	0.75
Korea, Dem. People’s Rep.	PRK	2014	20		34.0438				0.2				0.3605	0.318167	0.4375	0.25					-99		-99	1	0	0	0	0									0	0.5	0.647	0.091	0.125	0.8	0.8	0.154	0.222	0.4	0	0.333	0.875
Korea, Rep.	KOR	2014	60		63.25				0.6	1			0.662	0.564	0.9445	0.4375		1			1		1	1	1	0	0	1	1								0.833	0.75	0.778	0.636	0.375	0.6	0.8	0.417	0.5	0.5	0.5	0.667	0.889
Kosovo	XKX	2014	20						0.2									0.534			-99		-99	1	0	0	0	0
Kuwait	KWT	2014	50		51.0625				0.5				0.447833	0.518	0.75	0.4375		0.734			-99		-99	1	1	0	0	0.5									0.333	0.5	0.765	0.364	0.125	0.6	1	0.25	0.375	0.4	0.75	0.333	0.5
Kyrgyz Republic	KGZ	2014	60		69.9562				0.6				0.737833	0.6045	0.9445	0.625		0.4			-99		-99	1	1	0	0	1									0.833	0.625	0.889	0.455	0.625	1	0.933	0.5	0.444	0.667	0.75	0.333	0.889
Lao PDR	LAO	2014	50		64.2125				0.5				0.721667	0.4675	0.9445	0.625		0.6			-99		-99	0.5	1	0	0	1									1	0.429	0.765	0.636	0.5	1	0.933	0.417	0.222	0.4	0.5	0.333	0.889
Latvia	LVA	2014	60		47.025				0.6	1			0.5235	0.4805	0.25	0.5		0.934			1		1	1	1	0	0	1	1								0.5	0.444	0.722	0.5	0.375	0.6	0.8	0.583	0.5	0.667	0	0.333	0.5
Lebanon	LBN	2014	20		55.85				0.2				0.5385	0.427667	0.9445	0.625		0.468			-99		-99	0	1	0	0	0									0.833	0.5	0.5	0.273	0.125	1	0.733	0.25	0.25	0.5	0.5	0.333	0.889
Lesotho	LSO	2014	40		48.0812				0.4				0.541167	0.405333	0.4445	0.5625		0.734			-99		-99	0	1	0	0	1									0.5	0.625	0.667	0.455	0.25	0.75	0.933	0.333	0.333	0.5	0	0.333	0.889
Liberia	LBR	2014	40		65.7938				0.4				0.673167	0.583167	0.9445	0.55		0.468			-99		-99	0	1	0	0	1									0.833	0.625	0.667	0.364	0.75	0.8	0.933	0.583	0.25	0.4	1	0.333	0.889
Libya	LBY	2014	40		33.6688				0.4				0.360833	0.3055	0.4445	0.25		0.134			-99		-99	0	1	0	0	1									0.167	0.571	0.611	0.091	0.125	0.6	0.6	0.25	0.25	0.4	0	0.333	0.889
Liechtenstein	LIE	2014	20		20.8				0.2				0.169667	0.1905	0.3335	0.25					-99		-99	1	0	0	0	0									0.167	0	0.053	0.273	0.125	0.4	0.4	0.077	0	0.333	0	0.333	0.667
Lithuania	LTU	2014	60		49.8375				0.6	1			0.586667	0.492333	0.25	0.5		0.866			1		1	1	1	0	0	1	1								0.667	0.556	0.722	0.4	0.375	0.8	0.8	0.583	0.571	0.667	0	0.333	0.5
Luxembourg	LUX	2014	40		45.775				0.4	1			0.5185	0.426667	0.389	0.4375		0.666			1		1	1	0	0	0	1	1								0.5	0.444	0.667	0.4	0.5	0.6	0.8	0.583	0.444	0.4	0	0.333	0.778
Macao SAR, China	MAC	2014	40		19.2937				0.4				0.132333	0.2065	0.2145	0.3125					-99		-99	1	0	0	0	1									0	0.125	0.105	0.364	0	0.2	0.6	0.167	0.222	0.25	0	0	0.429
Madagascar	MDG	2014	60		62.9375				0.6				0.617667	0.558333	0.9445	0.5625		0.466			-99		-99	1	1	0	0	1									1	0.625	0.667	0.364	0.25	0.8	0.933	0.417	0.5	0.5	0.667	0.333	0.889
Malawi	MWI	2014	50		65.85				0.5				0.679167	0.512	0.9445	0.75		0.734			-99		-99	0.5	1	0	0	1									1	0.778	0.667	0.455	0.375	0.8	0.933	0.417	0.222	0.5	0.667	0.333	0.889
Malaysia	MYS	2014	60		66.1875				0.6				0.664	0.598667	0.9445	0.5625		0.466			-99		-99	1	1	0	0	1									1	0.556	0.833	0.545	0.25	0.8	0.8	0.667	0.625	0.667	0.5	0.333	0.889
Maldives	MDV	2014	30		42.4625				0.3				0.4685	0.359667	0.375	0.5375		0.334			-99		-99	0	1	0	0	0.5									0.333	0.286	0.778	0.364	0.25	0.8	0.8	0.25	0.125	0.4	0.25	0.333	0.75
Mali	MLI	2014	50		61.0187				0.5				0.561	0.596167	0.889	0.521		0.934			-99		-99	0.5	1	0	0	1									0.5	0.75	0.611	0.455	0.25	0.8	0.8	0.5	0.444	0.5	1	0.333	0.778
Malta	MLT	2014	60		41.85				0.6				0.4675	0.419333	0.25	0.4375		0.934			-99		-99	1	1	0	0	1									0.333	0.375	0.722	0.4	0.375	0.6	0.6	0.583	0.5	0.5	0	0.333	0.5
Marshall Islands	MHL	2014	0		43.9625				0				0.361333	0.403667	0.875	0.347		0.066			-99		-99	0	0	0	0	0									0.667	0.286	0.474	0.091	0.25	0.4	0.8	0.167	0.222	0.4	0.5	0.333	0.75
Mauritania	MRT	2014	30		45.5				0.3				0.541333	0.3405	0.4445	0.55		0.466			-99		-99	0.5	0	0	0	1									0.667	0.625	0.667	0.364	0.125	0.8	0.8	0.385	0.125	0.4	0	0.333	0.889
Mauritius	MUS	2014	50		68.45				0.5				0.627167	0.654167	0.9445	0.6875		0.6			-99		-99	0.5	1	0	0	1									1	0.444	0.833	0.636	0.25	0.6	0.8	0.583	0.625	0.5	0.75	0.667	0.889
Mexico	MEX	2014	60		75.425				0.6				0.780667	0.668167	0.9375	0.75		0.6			-99		-99	1	1	0	0	1									1	0.875	0.889	0.545	0.375	1	0.8	0.667	0.625	0.5	0.75	0.667	0.875
Micronesia, Fed. Sts.	FSM	2014	0		43.6437				0				0.344167	0.389667	0.9375	0.3525		0.2			-99		-99	0	0	0	0	0									0.667	0.143	0.389	0.091	0.375	0.4	0.8	0.333	0.222	0.4	0.25	0.333	0.875
Moldova	MDA	2014	60		55.6437				0.6				0.6915	0.373333	0.4445	0.8125		0.534			-99		-99	1	1	0	0	1									0.667	0.714	0.833	0.364	0.571	1	0.6	0.417	0.556	0.667	0	0	0.889
Monaco	MCO	2014	40		13.5				0.4				0.140167	0.074	0.1875	0.25					-99		-99	1	1	0	0	0									0	0	0.316	0	0.125	0.4	0.2	0.077	0	0.167	0	0	0.375
Mongolia	MNG	2014	60		67.5438				0.6				0.740167	0.496167	0.9445	0.75		0.6			-99		-99	1	1	0	0	1									1	0.778	0.833	0.455	0.375	1	0.8	0.5	0.444	0.4	0.5	0.333	0.889
Montenegro	MNE	2014	60		60.6437				0.6				0.6375	0.439833	0.9445	0.675		0.6			-99		-99	1	1	0	0	1									1	0.778	0.833	0.364	0.25	0.6	0.6	0.583	0.556	0.4	0.5	0	0.889
Morocco	MAR	2014	50		67.7562				0.5				0.715167	0.529167	0.9375	0.75		0.734			-99		-99	0.5	1	0	0	1									0.833	0.875	0.833	0.5	0.25	1	0.8	0.25	0.625	0.5	0.667	0.333	0.875
Mozambique	MOZ	2014	30		61.8				0.3				0.6095	0.55	0.9445	0.521		0.602			-99		-99	0.5	1	0	0	0									1	0.667	0.667	0.273	0.25	0.8	0.8	0.167	0.5	0.5	1	0.333	0.889
Myanmar	MMR	2014	20		55.0875				0.2				0.512167	0.431833	0.9445	0.6305		0.4			-99		-99	0	1	0	0	0									0.667	0.5	0.667	0.364	0.125	0.75	0.8	0.308	0.25	0.4	0.5	0.333	0.889
Namibia	NAM	2014	50		65.8063				0.5				0.656167	0.557	0.9375	0.6875		0.6			-99		-99	0.5	1	0	0	1									0.667	0.778	0.722	0.545	0.625	0.6	0.8	0.417	0.625	0.5	0.667	0.333	0.875
Nauru	NRU	2014	20		33.4				0.2				0.320833	0.331	0.375	0.3415		0.2			-99		-99	0	1	0	0	0									0.333	0.143	0.526	0.273	0.25	0.4	0.8	0.231	0.222	0.4	0	0.333	0.75
Nepal	NPL	2014	30		66.2313				0.3				0.711167	0.490167	0.9445	0.75		0.6			-99		-99	0	1	0	0	0.5									1	0.75	0.722	0.545	0.25	1	0.8	0.308	0.333	0.5	0.667	0.333	0.889
Netherlands	NLD	2014	60		49.4438				0.6	1			0.5685	0.458333	0.375	0.5		0.8			1		1	1	1	0	0	1	1								0.5	0.444	0.667	0.7	0.5	0.6	0.6	0.667	0.5	0.4	0.25	0.333	0.75
New Caledonia	NCL	2014	30		23.425				0.3				0.1605	0.176667	0.8125	0.05					-99		-99	1	0	0	0	0.5									0.333	0.125	0.105	0	0	0.4	0.4	0.077	0	0	0.25	0.333	0.625
New Zealand	NZL	2014	60		51.5125				0.6	1			0.4755	0.416667	0.9445	0.5		0.8			1		1	1	1	0	0	1	1								0.667	0.25	0.722	0.364	0.25	0.6	0.6	0.5	0.5	0.4	0.5	0	0.889
Nicaragua	NIC	2014	60		70.0938				0.6				0.687167	0.6195	0.9375	0.75		0.4			-99		-99	1	1	0	0	1									1	0.5	0.778	0.545	0.5	0.8	0.8	0.667	0.5	0.667	0.75	0.333	0.875
Niger	NER	2014	60		66.2				0.6				0.6895	0.561	0.9445	0.6		0.6			-99		-99	1	1	0	0	1									1	0.625	0.667	0.545	0.5	0.8	0.8	0.5	0.333	0.4	1	0.333	0.889
Nigeria	NGA	2014	40		49.7812				0.4				0.615	0.390167	0.4445	0.5225		0.666			-99		-99	0.5	1	0	0	0.5									0.5	0.75	0.667	0.273	0.5	1	0.8	0.333	0.375	0.5	0	0.333	0.889
North Macedonia	MKD	2014	60		49.75				0.6				0.613	0.336333	0.4445	0.6875		0.8			-99		-99	1	1	0	0	1									0.5	0.625	0.778	0.4	0.375	1	0.6	0.462	0.556	0.4	0	0	0.889
Northern Mariana Islands	MNP	2014	20		9.275				0.2				0.0841667	0.0333333	0.3125	0.077					-99		-99	1	0	0	0	0									0	0	0.105	0	0	0.4	0.2	0	0	0	0	0	0.625
Norway	NOR	2014	60		50.9188				0.6	1			0.566167	0.458333	0.4375	0.5625		1			1		1	1	1	0	0	1	1								0.5	0.5	0.722	0.7	0.375	0.6	0.6	0.667	0.5	0.4	0.25	0.333	0.875
Oman	OMN	2014	50		49.1938				0.5				0.604667	0.392333	0.4445	0.5		0.4			-99		-99	1	1	0	0	0.5									0.333	0.667	0.833	0.545	0.25	1	0.8	0.25	0.571	0.4	0	0.333	0.889
Pakistan	PAK	2014	60		65.2625				0.6				0.681	0.557	0.9445	0.5625		0.6			-99		-99	1	1	0	0	1									1	0.75	0.722	0.364	0.25	1	0.8	0.417	0.625	0.5	0.667	0.333	0.889
Palau	PLW	2014	0		46.6063				0				0.421167	0.414333	0.875	0.347		0.2			-99		-99	0	0	0	0	0									0.667	0.286	0.526	0.273	0.375	0.4	0.8	0.231	0.222	0.4	0.5	0.333	0.75
Panama	PAN	2014	60		69.5687				0.6				0.7265	0.584667	0.9445	0.6875		0.466			-99		-99	1	1	0	0	1									1	0.5	0.889	0.545	0.625	0.8	0.8	0.75	0.625	0.5	0.5	0.333	0.889
Papua New Guinea	PNG	2014	10		53.475				0.1				0.486167	0.466667	0.9445	0.475		0.134			-99		-99	0	0	0	0	0.5									0.667	0.571	0.556	0.273	0.25	0.6	0.8	0.25	0.25	0.667	0.5	0.333	0.889
Paraguay	PRY	2014	30		68.3937				0.3				0.699667	0.559333	0.9445	0.75		0.534			-99		-99	1	0	0	0	0.5									1	0.625	0.778	0.545	0.25	1	0.8	0.5	0.556	0.667	0.5	0.333	0.889
Peru	PER	2014	50		71.4813				0.5				0.731	0.6335	0.9375	0.6875		0.8			-99		-99	1	1	0	0	0.5									1	0.667	0.889	0.455	0.375	1	0.8	0.667	0.5	0.667	0.5	0.667	0.875
Philippines	PHL	2014	60		67.5938				0.6				0.665833	0.627333	0.9445	0.5835		0.934			-99		-99	1	1	0	0	1									0.833	0.75	0.889	0.273	0.25	1	0.8	0.583	0.714	0.667	0.667	0.333	0.889
Poland	POL	2014	60		53.0312				0.6	1			0.642667	0.459	0.4375	0.5		0.934			1		1	1	1	0	0	1	1								0.667	0.667	0.722	0.7	0.5	0.6	0.6	0.583	0.571	0.667	0	0.333	0.875
Portugal	PRT	2014	60		48.825				0.6	1			0.561	0.4285	0.4375	0.5		0.934			1		1	1	1	0	0	1	1								0.5	0.444	0.722	0.6	0.5	0.6	0.6	0.667	0.571	0.4	0	0.333	0.875
Puerto Rico	PRI	2014	40		20.275				0.4				0.148833	0.218167	0.3125	0.2085					-99		-99	1	0	0	0	1									0	0	0.111	0.182	0	0.6	0.6	0.154	0.222	0	0	0.333	0.625
Qatar	QAT	2014	60		38.5875				0.6				0.388833	0.402667	0.25	0.4625		0.668			-99		-99	1	1	0	0	1									0	0	0.778	0.455	0.5	0.6	0.8	0.333	0.5	0.2	0.25	0.333	0.5
Romania	ROU	2014	60		60.2687				0.6				0.5995	0.542333	0.8335	0.5625		0.934			-99		-99	1	1	0	0	1									1	0.375	0.722	0.4	0.5	0.6	0.6	0.583	0.571	0.667	0.5	0.333	0.667
Russian Federation	RUS	2014	60		57.4188				0.6				0.549167	0.475	0.8335	0.6875		0.6			-99		-99	1	1	0	0	1									0.667	0.375	0.778	0.5	0.375	0.6	0.6	0.417	0.5	0.5	0.5	0.333	0.667
Rwanda	RWA	2014	50		50.75				0.5				0.561667	0.4435	0.4445	0.6		0.732			-99		-99	1	1	0	0	0.5									0.5	0.625	0.722	0.273	0.25	1	0.8	0.417	0.111	0.667	0.333	0.333	0.889
Samoa	WSM	2014	50		58.7188				0.5				0.610667	0.466667	0.9445	0.521		0.398			-99		-99	0.5	1	0	0	1									0.833	0.625	0.667	0.364	0.375	0.8	0.8	0.417	0.25	0.5	0.5	0.333	0.889
San Marino	SMR	2014	20		16.6562				0.2				0.179167	0.0925	0.222	0.2955					-99		-99	1	0	0	0	0									0	0	0.368	0.182	0.125	0.4	0.2	0.077	0.111	0.167	0	0	0.444
Sao Tome and Principe	STP	2014	20		47.1313				0.2				0.546167	0.3125	0.4445	0.75		0.266			-99		-99	0	1	0	0	0									0.5	0.625	0.722	0.455	0.375	0.6	0.8	0.231	0.111	0.4	0	0.333	0.889
Saudi Arabia	SAU	2014	40		33.7062				0.4				0.279833	0.399167	0.3125	0.347		0.534			-99		-99	1	0	0	0	1									0	0.125	0.722	0.182	0.25	0.4	0.8	0.333	0.429	0.5	0	0.333	0.625
Senegal	SEN	2014	40		62.625				0.4				0.633833	0.508333	0.9445	0.639		0.734			-99		-99	0.5	1	0	0	0.5									1	0.667	0.722	0.364	0.25	0.8	0.8	0.25	0.5	0.5	0.667	0.333	0.889
Serbia	SRB	2014	60		68.0312				0.6				0.797	0.4565	0.9445	0.7375		0.6			-99		-99	1	1	0	0	1									1	0.778	0.833	0.6	0.571	1	0.6	0.583	0.556	0.5	0.5	0	0.889
Seychelles	SYC	2014	0		55.05				0				0.545333	0.420333	0.9445	0.5625		0.332			-99		-99	0	0	0	0	0									1	0.571	0.778	0.273	0.25	0.4	0.8	0.167	0.222	0.5	0.5	0.333	0.889
Sierra Leone	SLE	2014	50		62.375				0.5				0.692667	0.461333	0.9445	0.5835		0.466			-99		-99	0.5	1	0	0	1									1	0.625	0.667	0.364	0.5	1	0.8	0.385	0.25	0.5	0.5	0.333	0.889
Singapore	SGP	2014	60		35.6625				0.6	1			0.319167	0.402667	0.25	0.4375		0.734			1		1	1	1	0	0	1	1								0	0.143	0.722	0.2	0.25	0.6	0.8	0.333	0.5	0.2	0.25	0.333	0.5
Sint Maarten (Dutch part)	SXM	2014	20		9.875				0.2				0.0876667	0.0795	0.25	0.0385					-99		-99	1	0	0	0	0									0	0	0.053	0.273	0	0.2	0.4	0.077	0	0	0	0	0.5
Slovak Republic	SVK	2014	60		50.7625				0.6	1			0.584667	0.433333	0.4445	0.5625		0.934			1		1	1	1	0	0	1	1								0.667	0.444	0.722	0.7	0.375	0.6	0.6	0.667	0.5	0.5	0	0.333	0.889
Slovenia	SVN	2014	60		62.1125				0.6	1			0.642167	0.511833	0.9445	0.5625		0.934			1		1	1	1	0	0	1	1								1	0.556	0.722	0.6	0.375	0.6	0.6	0.667	0.571	0.4	0.5	0.333	0.889
Solomon Islands	SLB	2014	30		52.0625				0.3				0.5	0.434167	0.9375	0.425		0.266			-99		-99	0	1	0	0	0.5									1	0.375	0.611	0.364	0.25	0.4	0.8	0.25	0.222	0.5	0.5	0.333	0.875
Somalia	SOM	2014	0		29.6438				0				0.261667	0.295833	0.4375	0.2615		0.066			-99		-99	0	0	0	0	0									0.167	0.143	0.444	0.091	0.125	0.6	0.6	0.231	0.111	0.5	0	0.333	0.875
South Africa	ZAF	2014	60		59.8813				0.6				0.6765	0.543	0.4445	0.6875		0.8			-99		-99	1	1	0	0	1									0.667	0.875	0.778	0.364	0.375	1	0.8	0.5	0.625	0.667	0.333	0.333	0.889
South Sudan	SSD	2014	0		37.0438				0				0.4215	0.307	0.4445	0.3335		0.198			-99		-99	0	0	0	0	0									0.333	0.429	0.444	0.273	0.25	0.8	0.8	0.154	0.222	0.333	0	0.333	0.889
Spain	ESP	2014	60		59.7812				0.6	1			0.615	0.5	0.9375	0.5		1			1		1	1	1	0	0	1	1								0.667	0.556	0.667	0.7	0.5	0.6	0.6	0.667	0.5	0.4	0.5	0.333	0.875
Sri Lanka	LKA	2014	60		65.9188				0.6				0.65	0.543	0.9445	0.75		0.534			-99		-99	1	1	0	0	1									0.833	0.875	0.778	0.364	0.25	0.8	0.8	0.5	0.625	0.5	0.5	0.333	0.889
St. Kitts and Nevis	KNA	2014	0		46.925				0				0.377833	0.3735	0.875	0.625		0.066			-99		-99	0	0	0	0	0									0.667	0.143	0.368	0.364	0.125	0.6	0.8	0.083	0.125	0.4	0.5	0.333	0.75
St. Lucia	LCA	2014	40		57.4				0.4				0.502	0.443	0.9445	0.8125		0.468			-99		-99	0	1	0	0	1									0.5	0.429	0.778	0.455	0.25	0.6	0.8	0.25	0.125	0.4	0.75	0.333	0.889
St. Martin (French part)	MAF	2014	20		4.89375				0.2				0	0.0888333	0.125	0					-99		-99	1	0	0	0	0									0	0	0	0	0	0	0.2	0	0	0	0	0.333	0.25
St. Vincent and the Grenadines	VCT	2014	0		51.9813				0				0.454667	0.3875	0.9445	0.6875		0.066			-99		-99	0	0	0	0	0									0.667	0.25	0.722	0.364	0.125	0.6	0.8	0.167	0.125	0.4	0.5	0.333	0.889
Sudan	SDN	2014	40		58.9188				0.4				0.556333	0.484667	0.9445	0.646		0.332			-99		-99	0	1	0	0	1									0.667	0.667	0.556	0.273	0.375	0.8	0.8	0.5	0.375	0.4	0.5	0.333	0.889
Suriname	SUR	2014	10		43.2687				0.1				0.458	0.3625	0.4375	0.5625		0.266			-99		-99	0	0	0	0	0.5									0.167	0.625	0.833	0.273	0.25	0.6	0.8	0.167	0.375	0.5	0	0.333	0.875
Sweden	SWE	2014	60		60.7938				0.6	1			0.598	0.5	0.9445	0.625		0.732			1		1	1	1	0	0	1	1								0.833	0.444	0.611	0.6	0.5	0.6	0.6	0.667	0.5	0.4	0.5	0.333	0.889
Switzerland	CHE	2014	60		60.2812				0.6	1			0.590667	0.5145	0.9445	0.5625		0.934			1		1	1	1	0	0	1	1								0.833	0.625	0.611	0.5	0.375	0.6	0.6	0.583	0.571	0.5	0.5	0.333	0.889
Syrian Arab Republic	SYR	2014	40		37.4188				0.4				0.375667	0.3565	0.4445	0.3525		0.534			-99		-99	0	1	0	0	1									0	0.429	0.611	0.364	0.25	0.6	0.8	0.231	0.375	0.4	0	0.333	0.889
Taiwan, China	TWN	2014	40						0.4												-99		-99	1	0	0	0	1
Tajikistan	TJK	2014	30		48.8				0.3				0.538333	0.394	0.4445	0.6625		0.6			-99		-99	0.5	1	0	0	0									0.5	0.429	0.778	0.273	0.25	1	0.8	0.231	0.333	0.667	0	0.333	0.889
Tanzania	TZA	2014	50		72.5875				0.5				0.708833	0.682833	0.9445	0.6875		0.868			-99		-99	0.5	1	0	0	1									1	0.778	0.611	0.364	0.5	1	0.8	0.583	0.714	0.667	1	0.333	0.889
Thailand	THA	2014	60		57.2875				0.6				0.676833	0.4735	0.4445	0.6875		0.666			-99		-99	1	1	0	0	1									0.667	0.875	0.833	0.6	0.286	0.8	0.8	0.583	0.625	0.5	0	0.333	0.889
Timor-Leste	TLS	2014	50		57.1375				0.5				0.596833	0.445333	0.9445	0.5		0.666			-99		-99	0.5	1	0	0	1									1	0.625	0.667	0.364	0.125	0.8	0.8	0.417	0.222	0.4	0.5	0.333	0.889
Togo	TGO	2014	40		63.4438				0.4				0.627833	0.52	0.9445	0.6875		0.334			-99		-99	0.5	1	0	0	0.5									0.833	0.75	0.611	0.273	0.5	0.8	0.8	0.462	0.625	0.4	0.5	0.333	0.889
Tonga	TON	2014	20		49.5312				0.2				0.423167	0.401833	0.9375	0.55		0.2			-99		-99	0	1	0	0	0									0.667	0.429	0.611	0.182	0.25	0.4	0.8	0.167	0.111	0.5	0.5	0.333	0.875
Trinidad and Tobago	TTO	2014	20		57.4625				0.2				0.514833	0.452667	0.9445	0.75		0.466			-99		-99	0	0	0	0	1									0.333	0.75	0.667	0.364	0.375	0.6	0.8	0.333	0.5	0.5	0.25	0.333	0.889
Tunisia	TUN	2014	30		65.7062				0.3				0.708167	0.529167	0.9445	0.6		0.6			-99		-99	0.5	0	0	0	1									1	0.857	0.778	0.364	0.25	1	0.8	0.417	0.625	0.5	0.5	0.333	0.889
Turkey	TUR	2014	60		69.8625				0.6				0.681	0.598667	0.9375	0.8125		0.666			-99		-99	1	1	0	0	1									1	0.778	0.833	0.5	0.375	0.6	0.8	0.5	0.625	0.667	0.667	0.333	0.875
Turkmenistan	TKM	2014	0		35.9375				0				0.35	0.331	0.4445	0.3875		0.132			-99		-99	0	0	0	0	0									0.167	0.25	0.667	0.091	0.125	0.8	0.8	0.231	0.222	0.4	0	0.333	0.889
Turks and Caicos Islands	TCA	2014	20		12.0813				0.2				0.024	0.168333	0.25	0.1395					-99		-99	1	0	0	0	0									0	0	0.053	0.091	0	0	0.6	0.077	0	0	0	0.333	0.5
Tuvalu	TUV	2014	0		31.2875				0				0.322167	0.299667	0.3125	0.325		0.134			-99		-99	0	0	0	0	0									0.5	0.143	0.474	0.091	0.125	0.6	0.8	0.154	0.111	0.4	0	0.333	0.625
Uganda	UGA	2014	60		66.5125				0.6				0.677333	0.554667	0.9375	0.6875		0.734			-99		-99	1	1	0	0	1									1	0.714	0.611	0.364	0.375	1	0.8	0.417	0.444	0.667	0.667	0.333	0.875
Ukraine	UKR	2014	60		65.6562				0.6				0.6485	0.5375	0.9445	0.75		0.8			-99		-99	1	1	0	0	1									1	0.556	0.778	0.182	0.375	1	0.6	0.5	0.625	0.667	0.5	0.333	0.889
United Arab Emirates	ARE	2014	40		32.3625				0.4				0.341333	0.331	0.222	0.35		0.134			-99		-99	1	1	0	0	0									0.333	0.25	0.667	0.273	0.125	0.4	0.8	0.167	0.286	0.4	0	0.333	0.444
United Kingdom	GBR	2014	60		58.9375				0.6	1			0.5495	0.5615	0.9445	0.4375		0.866			1		1	1	1	0	0	1	1								0.667	0.444	0.611	0.6	0.375	0.6	0.6	0.615	0.571	0.5	0.75	0.333	0.889
United States	USA	2014	60		47.3687				0.6	1			0.521833	0.408	0.4375	0.5625		1			1		1	1	1	0	0	1	1								0.5	0.625	0.667	0.364	0.375	0.6	0.6	0.615	0.5	0.4	0	0.333	0.875
Uruguay	URY	2014	60		67.5687				0.6				0.710167	0.570833	0.875	0.6875		0.666			-99		-99	1	1	0	0	1									0.833	0.75	0.667	0.636	0.625	0.75	0.8	0.667	0.625	0.5	0.5	0.333	0.75
Uzbekistan	UZB	2014	10		44.7625				0.1				0.475167	0.420333	0.4445	0.45		0.132			-99		-99	0	0	0	0	0.5									0.5	0.375	0.778	0.273	0.125	0.8	0.8	0.333	0.556	0.5	0	0.333	0.889
Vanuatu	VUT	2014	30		55.8813				0.3				0.572167	0.415667	0.9445	0.5625		0.334			-99		-99	0	1	0	0	0.5									1	0.625	0.667	0.091	0.25	0.8	0.8	0.25	0.111	0.5	0.5	0.333	0.889
Venezuela, RB	VEN	2014	40		56.2125				0.4				0.4815	0.4985	0.9445	0.6125		0.4			-99		-99	0	1	0	0	1									0.667	0.25	0.667	0.455	0.25	0.6	0.8	0.333	0.625	0.4	0.5	0.333	0.889
Vietnam	VNM	2014	60		67.625				0.6				0.730167	0.570833	0.9445	0.5625		0.8			-99		-99	1	1	0	0	1									1	0.778	0.667	0.636	0.5	0.8	0.8	0.5	0.625	0.5	0.667	0.333	0.889
Virgin Islands (U.S.)	VIR	2014	20		9.3375				0.2				0.00883333	0.122167	0.25	0.104					-99		-99	1	0	0	0	0									0	0	0.053	0	0	0	0.4	0	0	0	0	0.333	0.5
West Bank and Gaza	PSE	2014	40		56.825				0.4				0.6205	0.423167	0.9375	0.4775		0.934			-99		-99	1	0	0	0	1									0.833	0.571	0.444	0.7	0.375	0.8	0.6	0.462	0.444	0.2	0.5	0.333	0.875
Yemen, Rep.	YEM	2014	50		63.3312				0.5				0.641833	0.523833	0.9445	0.625		0.468			-99		-99	0.5	1	0	0	1									1	0.429	0.667	0.455	0.5	0.8	0.8	0.385	0.375	0.5	0.75	0.333	0.889
Zambia	ZMB	2014	50		61.4312				0.5				0.613667	0.522167	0.9445	0.5625		0.8			-99		-99	0.5	1	0	0	1									1	0.714	0.611	0.182	0.375	0.8	0.8	0.333	0.333	0.667	0.667	0.333	0.889
Zimbabwe	ZWE	2014	40		48.8813				0.4				0.563333	0.4295	0.4445	0.4875		0.666			-99		-99	0	1	0	0	1									0.667	0.571	0.667	0.3	0.375	0.8	0.8	0.5	0.444	0.5	0	0.333	0.889
Afghanistan	AFG	2013	30		49.7375				0.3				0.564667	0.439833	0.4445	0.521		0.466			-99		-99	0	1	0	0	0.5									0.5	0.857	0.706	0.4	0.125	0.8	0.933	0.417	0.222	0.4	0	0.667	0.889
Albania	ALB	2013	60		70.8688				0.6				0.768	0.577833	0.9445	0.6875		0.534			-99		-99	1	1	0	0	1									1	0.875	0.833	0.6	0.5	0.8	0.8	0.667	0.333	0.5	0.5	0.667	0.889
Algeria	DZA	2013	40		58.3438				0.4				0.624333	0.558333	0.4445	0.675		0.266			-99		-99	0	1	0	0	1									0.667	0.714	0.765	0.5	0.5	0.6	0.933	0.583	0.25	0.667	0.25	0.667	0.889
American Samoa	ASM	2013	20		21.4625				0.2				0.112	0.163833	0.8125	0.077					-99		-99	1	0	0	0	0									0.167	0	0.105	0	0	0.4	0.4	0	0	0	0.25	0.333	0.625
Andorra	AND	2013	40		22.825				0.4				0.232	0.146167	0.3335	0.358		0.4			-99		-99	1	1	0	0	0									0.167	0	0.5	0.2	0.125	0.4	0.6	0.077	0	0.2	0	0	0.667
Angola	AGO	2013	40		65.15				0.4				0.517	0.697167	0.9445	0.625		0.468			-99		-99	0	1	0	0	1									0.667	0.429	0.556	0.4	0.25	0.8	0.933	0.583	0.5	0.5	1	0.667	0.889
Antigua and Barbuda	ATG	2013	0		52.8625				0				0.416333	0.535	0.875	0.5		0.2			-99		-99	0	0	0	0	0									0.5	0.167	0.706	0.4	0.125	0.6	1	0.25	0.143	0.4	0.75	0.667	0.75
Argentina	ARG	2013	40		77.8				0.4				0.714833	0.790333	0.9445	0.764		0.732			-99		-99	0	1	0	0	1									1	0.625	0.889	0.8	0.375	0.6	0.867	0.75	0.625	0.5	1	1	0.889
Armenia	ARM	2013	60		62.4813				0.6				0.695667	0.572333	0.4445	0.75		0.6			-99		-99	1	1	0	0	1									0.667	0.857	1	0.6	0.25	0.8	0.933	0.667	0.5	0.667	0	0.667	0.889
Aruba	ABW	2013	20		18.15				0.2				0.1175	0.201667	0.25	0.2445					-99		-99	1	0	0	0	0									0	0	0.105	0.4	0	0.2	0.8	0.077	0	0	0	0.333	0.5
Australia	AUS	2013	60		64.7375				0.6	1			0.646333	0.600833	0.9375	0.5		1			1		1	1	1	0	0	1	1								0.833	0.571	0.824	0.8	0.25	0.6	0.8	0.667	0.571	0.4	0.5	0.667	0.875
Austria	AUT	2013	60		62.425				0.6	1			0.5845	0.6195	0.9445	0.4375		0.934			1		1	1	1	0	0	1	1								0.667	0.375	0.765	0.6	0.5	0.6	0.8	0.75	0.5	0.5	0.5	0.667	0.889
Azerbaijan	AZE	2013	40		58.75				0.4				0.6865	0.502833	0.4445	0.6875		0.4			-99		-99	0	1	0	0	1									0.5	0.857	0.833	0.5	0.429	1	0.933	0.417	0.5	0.5	0	0.667	0.889
Bahamas, The	BHS	2013	60		34.8687				0.6				0.327	0.373667	0.25	0.4375		0.066			-99		-99	1	1	0	0	1									0.167	0.167	0.778	0.4	0.25	0.2	1	0.25	0.125	0.2	0	0.667	0.5
Bahrain	BHR	2013	50		36.4				0.5				0.370667	0.404167	0.25	0.3375		0.198			-99		-99	1	1	0	0	0.5									0.167	0.167	0.765	0.4	0.125	0.6	1	0.308	0.25	0.2	0	0.667	0.5
Bangladesh	BGD	2013	50		63.3563				0.5				0.733	0.579167	0.4445	0.6875		0.732			-99		-99	0.5	1	0	0	1									0.667	0.857	0.824	0.8	0.25	1	0.933	0.667	0.375	0.5	0.333	0.667	0.889
Barbados	BRB	2013	60		63.3563				0.6				0.622833	0.525	0.875	0.75		0.134			-99		-99	1	1	0	0	1									0.667	0.571	0.824	0.7	0.375	0.6	1	0.333	0.25	0.4	0.5	0.667	0.75
Belarus	BLR	2013	40		52.1938				0.4				0.612833	0.424833	0.375	0.6875		0.334			-99		-99	1	1	0	0	0									0.667	0.571	0.889	0.5	0.25	0.8	0.8	0.583	0.333	0.5	0	0.333	0.75
Belgium	BEL	2013	60		53.5938				0.6	1			0.601	0.534167	0.4445	0.4375		0.866			1		1	1	1	0	0	1	1								0.5	0.5	0.706	0.8	0.5	0.6	0.8	0.667	0.571	0.5	0	0.667	0.889
Belize	BLZ	2013	40		64.5375				0.4				0.600667	0.576333	0.9445	0.6875		0.534			-99		-99	0	1	0	0	1									0.667	0.571	0.941	0.7	0.125	0.6	0.933	0.583	0.125	0.4	0.75	0.667	0.889
Benin	BEN	2013	30		54.7938				0.3				0.561333	0.541	0.389	0.6875		0.6			-99		-99	0	1	0	0	0.5									0.667	0.429	0.722	0.5	0.25	0.8	0.933	0.538	0.375	0.4	0.333	0.667	0.778
Bermuda	BMU	2013	20		17.6125				0.2				0.134167	0.185833	0.25	0.199					-99		-99	1	0	0	0	0									0	0	0.105	0.3	0	0.4	0.6	0.154	0.111	0	0.25	0	0.5
Bhutan	BTN	2013	50		68.6375				0.5				0.742333	0.564833	0.9445	0.625		0.466			-99		-99	0.5	1	0	0	1									1	0.857	0.722	0.5	0.375	1	0.933	0.417	0.222	0.4	0.75	0.667	0.889
Bolivia	BOL	2013	50		71.8625				0.5				0.738833	0.665	0.9375	0.6		0.666			-99		-99	1	1	0	0	0.5									1	0.875	0.833	0.8	0.125	0.8	0.933	0.667	0.556	0.5	0.667	0.667	0.875
Bosnia and Herzegovina	BIH	2013	50		57.9562				0.5				0.6575	0.489833	0.4445	0.75		0.6			-99		-99	0.5	1	0	0	1									0.667	0.714	0.889	0.5	0.375	0.8	0.8	0.583	0.556	0.667	0	0.333	0.889
Botswana	BWA	2013	20		58.7				0.2				0.627333	0.5815	0.4445	0.625		0.668			-99		-99	0.5	0	0	0	0.5									0.667	0.625	0.722	0.7	0.25	0.8	0.933	0.583	0.556	0.5	0.25	0.667	0.889
Brazil	BRA	2013	50		79.1813				0.5				0.725833	0.844	0.9375	0.6875		0.532			-99		-99	1	1	0	0	0.5									0.833	0.714	0.833	0.6	0.375	1	0.933	0.75	0.714	0.667	1	1	0.875
British Virgin Islands	VGB	2013	20		15.35				0.2				0.0921667	0.2035	0.25	0.091					-99		-99	1	0	0	0	0									0	0	0.053	0.3	0	0.2	0.4	0.154	0	0	0	0.667	0.5
Brunei Darussalam	BRN	2013	50		35.5938				0.5				0.3435	0.382	0.3335	0.3375		0.2			-99		-99	1	1	0	0	0.5									0.167	0.429	0.765	0.3	0	0.4	1	0.25	0.125	0.25	0	0.667	0.667
Bulgaria	BGR	2013	60		63.225				0.6				0.601833	0.598	0.8335	0.625		0.866			-99		-99	1	1	0	0	1									0.833	0.5	0.778	0.4	0.5	0.6	0.6	0.5	0.571	0.5	0.75	0.667	0.667
Burkina Faso	BFA	2013	20		68.2				0.2				0.699	0.578	0.9375	0.6875		0.8			-99		-99	0	1	0	0	0									0.833	0.714	0.722	0.5	0.625	0.8	0.933	0.385	0.333	0.4	0.75	0.667	0.875
Burundi	BDI	2013	30		50.7437				0.3				0.598167	0.425833	0.4375	0.55		0.466			-99		-99	0.5	1	0	0	0									0.667	0.714	0.722	0.4	0.286	0.8	0.933	0.333	0.222	0.4	0	0.667	0.875
Cabo Verde	CPV	2013	30		61.0312				0.3				0.4905	0.572167	0.9445	0.75		0.398			-99		-99	0	1	0	0	0.5									0.5	0.429	0.889	0.4	0.125	0.6	0.933	0.25	0.333	0.5	0.75	0.667	0.889
Cambodia	KHM	2013	40		68.2875				0.4				0.728333	0.590333	0.9445	0.5625		0.734			-99		-99	0	1	0	0	1									1	0.571	0.824	0.6	0.375	1	0.933	0.667	0.375	0.4	0.5	0.667	0.889
Cameroon	CMR	2013	30		64.0625				0.3				0.564333	0.625	0.9445	0.6125		0.534			-99		-99	0	1	0	0	0.5									0.5	0.571	0.765	0.5	0.25	0.8	0.933	0.5	0.25	0.4	1	0.667	0.889
Canada	CAN	2013	60		51.2938				0.6	1			0.551833	0.5035	0.4375	0.5		1			1		1	1	1	0	0	1	1								0.5	0.571	0.765	0.5	0.375	0.6	0.8	0.583	0.571	0.4	0	0.667	0.875
Cayman Islands	CYM	2013	20		16.175				0.2				0.0921667	0.201667	0.25	0.1625					-99		-99	1	0	0	0	0									0	0	0.053	0.3	0	0.2	0.8	0.077	0	0	0	0.333	0.5
Central African Republic	CAF	2013	0		44.15				0				0.512667	0.351667	0.4445	0.4945		0.2			-99		-99	0	0	0	0	0									0.167	0.667	0.667	0.4	0.375	0.8	0.933	0.333	0.111	0.4	0	0.333	0.889
Chad	TCD	2013	30		42.975				0.3				0.530833	0.337833	0.4445	0.3875		0.4			-99		-99	0.5	1	0	0	0									0.667	0.571	0.722	0.3	0.125	0.8	0.933	0.25	0.111	0.4	0	0.333	0.889
Channel Islands	CHI	2013	20						0.2												-99		-99	1	0	0	0	0
Chile	CHL	2013	60		70.3438				0.6	1			0.709667	0.643	0.9445	0.625		0.532			1		1	1	1	0	0	1	1								1	0.875	0.833	0.5	0.25	0.8	1	0.75	0.625	0.4	0.75	0.333	0.889
China	CHN	2013	50		51.3625				0.5				0.541333	0.471833	0.4445	0.625		0.468			-99		-99	1	1	0	0	0.5									0.667	0.75	0.706	0.2	0.125	0.8	0.933	0.231	0.5	0.5	0	0.667	0.889
Colombia	COL	2013	60		76.5563				0.6				0.7955	0.704333	0.9375	0.6875		0.934			-99		-99	1	1	0	0	1									1	0.857	0.941	0.6	0.375	1	0.933	0.667	0.625	0.667	0.667	0.667	0.875
Comoros	COM	2013	0		55.8125				0				0.5575	0.435	0.9375	0.55		0.334			-99		-99	0	0	0	0	0									0.667	0.5	0.778	0.3	0.5	0.6	0.933	0.333	0.111	0.4	0.5	0.333	0.875
Congo, Dem. Rep.	COD	2013	50		48.8438				0.5				0.5775	0.4235	0.4445	0.46		0.602			-99		-99	0.5	1	0	0	1									0.667	0.667	0.706	0.5	0.125	0.8	0.933	0.5	0.375	0.4	0	0.333	0.889
Congo, Rep.	COG	2013	50		50.6812				0.5				0.632667	0.387333	0.4445	0.55		0.4			-99		-99	0.5	1	0	0	1									0.667	0.714	0.765	0.4	0.25	1	0.933	0.308	0.25	0.5	0	0.333	0.889
Costa Rica	CRI	2013	60		73.2				0.6				0.741	0.606833	0.9375	0.875		0.6			-99		-99	1	1	0	0	1									1	0.571	1	0.7	0.375	0.8	0.933	0.75	0.625	0.5	0.5	0.333	0.875
Cote d'Ivoire	CIV	2013	40		63.6187				0.4				0.663	0.545	0.9445	0.521		0.532			-99		-99	0.5	1	0	0	0.5									0.667	0.714	0.722	0.5	0.375	1	0.933	0.462	0.375	0.5	0.667	0.333	0.889
Croatia	HRV	2013	60		53.7687				0.6				0.616667	0.502333	0.4445	0.5		0.866			-99		-99	1	1	0	0	1									0.667	0.625	0.833	0.4	0.375	0.8	0.8	0.5	0.714	0.667	0	0.333	0.889
Cuba	CUB	2013	60		44.4125				0.6				0.4785	0.3985	0.4445	0.4775					-99		-99	1	1	0	0	1									0.167	0.429	0.889	0.5	0.286	0.6	0.6	0.308	0.5	0.4	0.25	0.333	0.889
Curacao	CUW	2013	20		15.4375				0.2				0.0675	0.233	0.25	0.0835					-99		-99	1	0	0	0	0									0	0	0.105	0.1	0	0.2	0.8	0.154	0.111	0	0	0.333	0.5
Cyprus	CYP	2013	60		55.0875				0.6				0.544	0.522167	0.8335	0.375		0.866			-99		-99	1	1	0	0	1									0.667	0.5	0.722	0.4	0.375	0.6	0.8	0.5	0.5	0.5	0.5	0.333	0.667
Czech Republic	CZE	2013	60		52.375				0.6	1			0.615167	0.466667	0.4445	0.5		0.934			1		1	1	1	0	0	1	1								0.667	0.625	0.824	0.6	0.375	0.6	0.8	0.667	0.5	0.5	0	0.333	0.889
Denmark	DNK	2013	60		48.8687				0.6	1			0.596333	0.436	0.375	0.4375		0.866			1		1	1	1	0	0	1	1								0.5	0.5	0.778	0.7	0.5	0.6	0.8	0.583	0.5	0.4	0	0.333	0.75
Djibouti	DJI	2013	0		54.4562				0				0.588333	0.4235	0.8335	0.4875		0.268			-99		-99	0	0	0	0	0									0.833	0.5	0.722	0.5	0.375	0.6	0.933	0.25	0.125	0.4	0.5	0.333	0.667
Dominica	DMA	2013	0		50.975				0				0.446333	0.3875	0.889	0.6875		0.2			-99		-99	0	0	0	0	0									0.667	0.286	0.5	0.5	0.125	0.6	0.8	0.167	0.125	0.4	0.5	0.333	0.778
Dominican Republic	DOM	2013	60		57.8438				0.6				0.683333	0.440167	0.4445	0.8125		0.6			-99		-99	1	1	0	0	1									0.667	0.714	0.944	0.6	0.375	0.8	0.933	0.5	0.375	0.5	0	0.333	0.889
Ecuador	ECU	2013	60		76.0625				0.6				0.818667	0.676333	0.9375	0.6625		0.8			-99		-99	1	1	0	0	1									1	0.857	0.941	0.6	0.714	0.8	0.933	0.583	0.625	0.5	0.75	0.667	0.875
Egypt, Arab Rep.	EGY	2013	60		68.9562				0.6				0.6185	0.676333	0.9445	0.6875		0.6			-99		-99	1	1	0	0	1									0.833	0.571	0.882	0.5	0.125	0.8	0.933	0.667	0.625	0.5	1	0.333	0.889
El Salvador	SLV	2013	50		70.9437				0.5				0.706167	0.641667	0.9445	0.6875		0.266			-99		-99	1	1	0	0	0.5									1	0.429	0.833	0.6	0.375	1	0.933	0.583	0.5	0.667	0.5	0.667	0.889
Equatorial Guinea	GNQ	2013	20		52.8875				0.2				0.549667	0.420833	0.9445	0.375		0.132			-99		-99	0	1	0	0	0									0.5	0.667	0.556	0.4	0.375	0.8	1	0.167	0.125	0.4	0.5	0.333	0.889
Eritrea	ERI	2013	20		40.3062				0.2				0.479333	0.334833	0.4445	0.3375		0			-99		-99	0	1	0	0	0									0.167	0.667	0.667	0.4	0.375	0.6	0.8	0.154	0.222	0.5	0	0.333	0.889
Estonia	EST	2013	60		61.8375				0.6	1			0.6775	0.575667	0.75	0.4375		0.934			1		1	1	1	0	0	1	1								1	0.5	0.765	0.7	0.5	0.6	0.8	0.583	0.571	0.667	0.5	0.333	0.5
Eswatini	SWZ	2013	20		59.6313				0.2				0.657833	0.457333	0.9375	0.4875		0.266			-99		-99	0	1	0	0	0									1	0.857	0.765	0.4	0.125	0.8	0.8	0.333	0.111	0.667	0.5	0.333	0.875
Ethiopia	ETH	2013	50		70.7375				0.5				0.766167	0.617833	0.9445	0.5625		1			-99		-99	0.5	1	0	0	1									1	0.875	0.722	0.5	0.5	1	0.933	0.385	0.556	0.5	1	0.333	0.889
Faroe Islands	FRO	2013	20		8.34375				0.2				0.0421667	0.0666667	0.25	0.091					-99		-99	1	0	0	0	0									0	0	0.053	0	0	0.2	0.4	0	0	0	0	0	0.5
Fiji	FJI	2013	60		59.6063				0.6				0.581667	0.488833	0.9445	0.6125		0.4			-99		-99	1	1	0	0	1									0.833	0.429	0.778	0.4	0.25	0.8	0.933	0.417	0.25	0.5	0.5	0.333	0.889
Finland	FIN	2013	60		62.3312				0.6	1			0.6705	0.533333	0.9375	0.4375		0.732			1		1	1	1	0	0	1	1								0.833	0.625	0.765	0.7	0.5	0.6	0.8	0.667	0.5	0.4	0.5	0.333	0.875
France	FRA	2013	60		47.8375				0.6	1			0.594167	0.45	0.4445	0.25		0.934			1		1	1	1	0	0	1	1								0.5	0.5	0.765	0.7	0.5	0.6	0.8	0.667	0.5	0.4	0	0.333	0.889
French Polynesia	PYF	2013	30		13.0188				0.3				0.0413333	0.168333	0.3125	0.1					-99		-99	1	0	0	0	0.5									0	0.143	0.105	0	0	0	0.6	0.077	0	0	0	0.333	0.625
Gabon	GAB	2013	20		48.1313				0.2				0.5025	0.409667	0.389	0.725		0.198			-99		-99	0	0	0	0	1									0.333	0.571	0.611	0.2	0.5	0.8	0.933	0.417	0.375	0.4	0	0.333	0.778
Gambia, The	GMB	2013	20		62.9312				0.2				0.654333	0.553	0.875	0.5375		0.6			-99		-99	0	1	0	0	0									0.833	0.571	0.722	0.3	0.5	1	0.933	0.385	0.5	0.667	0.5	0.333	0.75
Georgia	GEO	2013	50		57.0562				0.5				0.648333	0.495833	0.4445	0.6875		0.666			-99		-99	1	1	0	0	0.5									0.667	0.857	0.941	0.5	0.125	0.8	0.933	0.417	0.625	0.667	0	0.333	0.889
Germany	DEU	2013	60		49.825				0.6	1			0.570333	0.466667	0.4375	0.4375		0.934			1		1	1	1	0	0	1	1								0.5	0.5	0.722	0.6	0.5	0.6	0.8	0.667	0.5	0.5	0	0.333	0.875
Ghana	GHA	2013	40		68.85				0.4				0.742	0.558333	0.9445	0.6625		0.466			-99		-99	0.5	1	0	0	0.5									1	0.571	0.706	0.8	0.375	1	0.933	0.417	0.5	0.5	0.667	0.333	0.889
Gibraltar	GIB	2013	20		8.9875				0.2				0.1	0.0851667	0.125	0.0385					-99		-99	1	0	0	0	0									0	0	0	0.2	0	0.4	0.4	0	0.111	0	0	0	0.25
Greece	GRC	2013	60		50.0438				0.6	1			0.537	0.5035	0.4445	0.4375		0.934			1		1	1	1	0	0	1	1								0.5	0.5	0.722	0.4	0.5	0.6	0.8	0.667	0.571	0.4	0.25	0.333	0.889
Greenland	GRL	2013	20		10.6125				0.2				0.0841667	0.0795	0.3125	0.0455					-99		-99	1	0	0	0	0									0	0	0.105	0	0	0.4	0.4	0.077	0	0	0	0	0.625
Grenada	GRD	2013	20		55.1938				0.2				0.515333	0.4125	0.9445	0.6875		0.2			-99		-99	0	1	0	0	0									0.667	0.333	0.667	0.5	0.125	0.8	0.867	0.25	0.125	0.4	0.5	0.333	0.889
Guam	GUM	2013	40		13.1562				0.4				0.0841667	0.1555	0.25	0.0835					-99		-99	1	0	0	0	1									0	0	0.105	0	0	0.4	0.6	0	0	0	0	0.333	0.5
Guatemala	GTM	2013	40		67.4062				0.4				0.627333	0.64	0.9445	0.646		0.6			-99		-99	0	1	0	0	1									0.667	0.714	0.833	0.5	0.25	0.8	0.933	0.615	0.625	0.667	0.667	0.333	0.889
Guinea	GIN	2013	30		44.0812				0.3				0.533833	0.340167	0.4445	0.46		0.268			-99		-99	0.5	1	0	0	0									0.667	0.5	0.611	0.5	0.125	0.8	0.933	0.25	0.125	0.4	0	0.333	0.889
Guinea-Bissau	GNB	2013	20		40.4937				0.2				0.5005	0.321833	0.375	0.3975		0.2			-99		-99	0	1	0	0	0									0.5	0.667	0.611	0.3	0.125	0.8	0.933	0.154	0.111	0.4	0	0.333	0.75
Guyana	GUY	2013	20		58.95				0.2				0.619167	0.454167	0.8335	0.6625		0.2			-99		-99	0	1	0	0	0									0.667	0.857	0.941	0.4	0.25	0.6	0.933	0.167	0.125	0.5	0.667	0.333	0.667
Haiti	HTI	2013	50		48.1125				0.5				0.535	0.4465	0.4445	0.46		0.268			-99		-99	1	1	0	0	0.5									0.667	0.571	0.722	0.2	0.25	0.8	0.933	0.538	0.375	0.5	0	0.333	0.889
Honduras	HND	2013	50		74.2562				0.5				0.799167	0.593	0.9375	0.8265		0.8			-99		-99	1	1	0	0	0.5									0.833	0.571	0.941	0.7	0.75	1	0.933	0.667	0.375	0.5	0.75	0.333	0.875
Hong Kong SAR, China	HKG	2013	40		28.5813				0.4				0.24	0.302	0.2855	0.375					-99		-99	1	0	0	0	1									0.167	0.143	0.105	0.5	0.125	0.4	0.6	0.25	0.429	0.2	0	0.333	0.571
Hungary	HUN	2013	60		46.9312				0.6	1			0.560833	0.412833	0.3335	0.5		0.934			1		1	1	1	0	0	1	1								0.5	0.5	0.765	0.5	0.5	0.6	0.8	0.5	0.444	0.4	0	0.333	0.667
Iceland	ISL	2013	40		47.5063				0.4	1			0.4835	0.491667	0.4375	0.4375		0.666			1		1	1	0	0	0	1	1								0.5	0.429	0.722	0.4	0.25	0.6	0.8	0.583	0.5	0.4	0	0.667	0.875
India	IND	2013	50		57.0625				0.5				0.5815	0.565167	0.4375	0.6875		0.934			-99		-99	1	1	0	0	0.5									0.667	0.625	0.647	0.3	0.25	1	0.933	0.667	0.625	0.5	0.333	0.333	0.875
Indonesia	IDN	2013	60		71.125				0.6				0.690167	0.6625	0.9445	0.6875		0.8			-99		-99	1	1	0	0	1									0.833	0.857	0.765	0.6	0.286	0.8	0.933	0.417	0.625	0.667	1	0.333	0.889
Iran, Islamic Rep.	IRN	2013	60		66.9938				0.6				0.764667	0.523667	0.9445	0.55		0.4			-99		-99	1	1	0	0	1									0.833	0.714	0.941	0.6	0.5	1	0.867	0.417	0.625	0.4	0.5	0.333	0.889
Iraq	IRQ	2013	40		62.3438				0.4				0.615833	0.587833	0.9445	0.432		0.4			-99		-99	0.5	1	0	0	0.5									0.833	0.571	0.941	0.3	0.25	0.8	0.933	0.417	0.444	0.4	1	0.333	0.889
Ireland	IRL	2013	60		46.575				0.6	1			0.532833	0.436	0.4445	0.375		0.866			1		1	1	1	0	0	1	1								0.5	0.5	0.722	0.5	0.375	0.6	0.8	0.583	0.5	0.4	0	0.333	0.889
Isle of Man	IMN	2013	20		8.18125				0.2				0.0611667	0.0945	0.125	0.0625					-99		-99	1	0	0	0	0									0.167	0	0	0	0	0.2	0.4	0	0	0.167	0	0	0.25
Israel	ISR	2013	60		40.9375				0.6	1			0.475	0.366667	0.3125	0.4375		0.466			1		1	1	1	0	0	1	1								0.333	0.5	0.667	0.5	0.25	0.6	0.8	0.5	0.5	0.4	0	0	0.625
Italy	ITA	2013	60		61.4				0.6	1			0.614833	0.561833	0.9445	0.4375		0.934			1		1	1	1	0	0	1	1								0.667	0.5	0.722	0.7	0.5	0.6	0.8	0.667	0.571	0.5	0.5	0.333	0.889
Jamaica	JAM	2013	40		64.2812				0.4				0.629833	0.498667	0.9445	0.8125		0.6			-99		-99	0	1	0	0	1									0.833	0.714	0.882	0.5	0.25	0.6	0.867	0.417	0.375	0.5	0.5	0.333	0.889
Japan	JPN	2013	60		58.75				0.6	1			0.579667	0.5055	0.9445	0.5		0.666			1		1	1	1	0	0	1	1								0.667	0.571	0.765	0.5	0.375	0.6	0.8	0.5	0.5	0.4	0.5	0.333	0.889
Jordan	JOR	2013	60		68.875				0.6				0.776	0.516667	0.9445	0.6875		0.6			-99		-99	1	1	0	0	1									1	0.857	0.824	0.6	0.375	1	0.933	0.417	0.25	0.5	0.667	0.333	0.889
Kazakhstan	KAZ	2013	60		70.0875				0.6				0.729667	0.595333	0.9445	0.6875		0.6			-99		-99	1	1	0	0	1									1	0.714	0.889	0.4	0.375	1	0.933	0.583	0.556	0.667	0.5	0.333	0.889
Kenya	KEN	2013	20		61.7875				0.2				0.559333	0.586	0.9445	0.5625		0.534			-99		-99	0	1	0	0	0									0.5	0.625	0.706	0.4	0.125	1	0.933	0.25	0.5	0.5	1	0.333	0.889
Kiribati	KIR	2013	20		36.0375				0.2				0.368333	0.321833	0.375	0.4375		0.2			-99		-99	0	1	0	0	0									0.167	0.286	0.882	0.1	0.375	0.4	0.933	0.154	0.111	0.4	0	0.333	0.75
Korea, Dem. People’s Rep.	PRK	2013	20		36.1125				0.2				0.383667	0.329333	0.4375	0.3125					-99		-99	1	0	0	0	0									0	0.571	0.706	0.1	0.125	0.8	0.867	0.154	0.222	0.4	0	0.333	0.875
Korea, Rep.	KOR	2013	60		63.425				0.6	1			0.666667	0.564	0.9445	0.4375		1			1		1	1	1	0	0	1	1								0.833	0.714	0.778	0.7	0.375	0.6	0.8	0.417	0.5	0.5	0.5	0.667	0.889
Kosovo	XKX	2013	20						0.2									0.466			-99		-99	1	0	0	0	0
Kuwait	KWT	2013	50		51.2125				0.5				0.465667	0.504167	0.75	0.4375		0.666			-99		-99	1	1	0	0	0.5									0.333	0.571	0.765	0.4	0.125	0.6	1	0.167	0.375	0.4	0.75	0.333	0.5
Kyrgyz Republic	KGZ	2013	60		70.5312				0.6				0.760167	0.576667	0.9445	0.6875		0.466			-99		-99	1	1	0	0	1									0.833	0.714	0.889	0.5	0.625	1	0.933	0.5	0.444	0.5	0.75	0.333	0.889
Lao PDR	LAO	2013	50		64.275				0.5				0.723333	0.4675	0.9445	0.625		0.6			-99		-99	0.5	1	0	0	1									1	0.5	0.765	0.7	0.375	1	0.933	0.417	0.222	0.4	0.5	0.333	0.889
Latvia	LVA	2013	60		46.5938				0.6	1			0.532833	0.4805	0.25	0.4375		0.934			1		1	1	1	0	0	1	1								0.5	0.5	0.722	0.5	0.375	0.6	0.8	0.583	0.5	0.667	0	0.333	0.5
Lebanon	LBN	2013	20		59.325				0.2				0.575667	0.4415	0.9445	0.75		0.468			-99		-99	0	1	0	0	0									0.833	0.571	0.5	0.3	0.25	1	0.733	0.333	0.25	0.5	0.5	0.333	0.889
Lesotho	LSO	2013	40		50.9062				0.4				0.595667	0.405333	0.4445	0.625		0.668			-99		-99	0	1	0	0	1									0.5	0.857	0.667	0.5	0.25	0.8	0.933	0.333	0.333	0.5	0	0.333	0.889
Liberia	LBR	2013	40		52.15				0.4				0.566333	0.472	0.4445	0.6125		0.4			-99		-99	0	1	0	0	1									0.167	0.714	0.667	0.3	0.75	0.8	0.933	0.583	0.25	0.4	0.333	0.333	0.889
Libya	LBY	2013	40		31.8938				0.4				0.3135	0.3055	0.4445	0.25		0.2			-99		-99	0	1	0	0	1									0.167	0.333	0.556	0.1	0.125	0.6	0.6	0.25	0.25	0.4	0	0.333	0.889
Liechtenstein	LIE	2013	20		20.1875				0.2				0.174167	0.1905	0.3335	0.1875					-99		-99	1	0	0	0	0									0.167	0	0.053	0.3	0.125	0.4	0.4	0.077	0	0.333	0	0.333	0.667
Lithuania	LTU	2013	60		46.4125				0.6	1			0.516167	0.492333	0.25	0.4375		0.8			1		1	1	1	0	0	1	1								0.5	0.5	0.722	0.4	0.375	0.6	0.8	0.583	0.571	0.667	0	0.333	0.5
Luxembourg	LUX	2013	40		45.5312				0.4	1			0.516167	0.443333	0.389	0.375		0.666			1		1	1	0	0	0	1	1								0.5	0.375	0.722	0.4	0.5	0.6	0.8	0.583	0.444	0.5	0	0.333	0.778
Macao SAR, China	MAC	2013	40		19.3188				0.4				0.141333	0.198167	0.2145	0.3125					-99		-99	1	0	0	0	1									0	0.143	0.105	0.4	0	0.2	0.6	0.167	0.222	0.2	0	0	0.429
Madagascar	MDG	2013	60		64.2188				0.6				0.651833	0.558333	0.9445	0.5625		0.466			-99		-99	1	1	0	0	1									1	0.714	0.722	0.3	0.375	0.8	0.933	0.417	0.5	0.5	0.667	0.333	0.889
Malawi	MWI	2013	50		64.55				0.5				0.686167	0.512	0.9445	0.625		0.734			-99		-99	0.5	1	0	0	1									1	0.875	0.667	0.4	0.375	0.8	0.933	0.417	0.222	0.5	0.667	0.333	0.889
Malaysia	MYS	2013	60		65.9188				0.6				0.684667	0.570833	0.9445	0.5625		0.534			-99		-99	1	1	0	0	1									1	0.625	0.833	0.6	0.25	0.8	0.8	0.667	0.625	0.5	0.5	0.333	0.889
Maldives	MDV	2013	20		44.5312				0.2				0.554167	0.345833	0.375	0.4875		0.4			-99		-99	0	1	0	0	0									0.5	0.667	0.833	0.4	0.125	0.8	0.8	0.167	0.125	0.4	0.25	0.333	0.75
Mali	MLI	2013	50		64.3563				0.5				0.653	0.5585	0.889	0.625		0.934			-99		-99	0.5	1	0	0	1									1	0.857	0.611	0.4	0.25	0.8	0.8	0.385	0.333	0.5	1	0.333	0.778
Malta	MLT	2013	60		41.4062				0.6				0.4765	0.419333	0.25	0.375		0.866			-99		-99	1	1	0	0	1									0.333	0.429	0.722	0.4	0.375	0.6	0.6	0.583	0.5	0.5	0	0.333	0.5
Marshall Islands	MHL	2013	0		32.0688				0				0.294167	0.320333	0.375	0.347		0.132			-99		-99	0	0	0	0	0									0.333	0.333	0.474	0.1	0.125	0.4	0.8	0.167	0.222	0.4	0	0.333	0.75
Mauritania	MRT	2013	30		42.375				0.3				0.478833	0.3405	0.4445	0.4875		0.4			-99		-99	0.5	0	0	0	1									0.167	0.714	0.667	0.4	0.125	0.8	0.8	0.385	0.125	0.4	0	0.333	0.889
Mauritius	MUS	2013	50		69.6375				0.5				0.638	0.654167	0.9445	0.75		0.666			-99		-99	0.5	1	0	0	1									1	0.5	0.778	0.7	0.25	0.6	0.8	0.583	0.625	0.5	0.75	0.667	0.889
Mexico	MEX	2013	60		75.3				0.6				0.777333	0.668167	0.9375	0.75		0.6			-99		-99	1	1	0	0	1									1	1	0.889	0.6	0.375	0.8	0.8	0.667	0.625	0.5	0.75	0.667	0.875
Micronesia, Fed. Sts.	FSM	2013	0		42.3813				0				0.335833	0.3435	0.9375	0.415		0.2			-99		-99	0	0	0	0	0									0.667	0.167	0.556	0.1	0.125	0.4	0.8	0.167	0.111	0.4	0.25	0.333	0.875
Moldova	MDA	2013	60		55.2062				0.6				0.700667	0.373333	0.4445	0.75		0.6			-99		-99	1	1	0	0	1									0.667	0.833	0.833	0.5	0.571	0.8	0.6	0.417	0.556	0.667	0	0	0.889
Monaco	MCO	2013	40		13.5				0.4				0.140167	0.074	0.1875	0.25					-99		-99	1	1	0	0	0									0	0	0.316	0	0.125	0.4	0.2	0.077	0	0.167	0	0	0.375
Mongolia	MNG	2013	60		68.4313				0.6				0.763833	0.496167	0.9445	0.75		0.6			-99		-99	1	1	0	0	1									1	0.875	0.833	0.5	0.375	1	0.8	0.5	0.444	0.4	0.5	0.333	0.889
Montenegro	MNE	2013	60		61.475				0.6				0.659667	0.439833	0.9445	0.675		0.6			-99		-99	1	1	0	0	1									1	0.875	0.833	0.4	0.25	0.6	0.6	0.583	0.556	0.4	0.5	0	0.889
Morocco	MAR	2013	50		68.3688				0.5				0.773167	0.529167	0.9375	0.625		0.8			-99		-99	0.5	1	0	0	1									1	1	0.889	0.5	0.25	1	0.8	0.25	0.625	0.5	0.667	0.333	0.875
Mozambique	MOZ	2013	30		58.9438				0.3				0.5445	0.55	0.9445	0.4875		0.734			-99		-99	0.5	1	0	0	0									0.5	0.75	0.667	0.3	0.25	0.8	0.8	0.167	0.5	0.5	1	0.333	0.889
Myanmar	MMR	2013	20		57.0625				0.2				0.613667	0.419	0.9445	0.5225		0.4			-99		-99	0	1	0	0	0									0.833	0.857	0.667	0.4	0.125	0.8	0.8	0.231	0.25	0.4	0.5	0.333	0.889
Namibia	NAM	2013	50		64.9688				0.5				0.706167	0.5055	0.9375	0.625		0.6			-99		-99	0.5	1	0	0	1									0.833	0.857	0.722	0.6	0.625	0.6	0.8	0.333	0.5	0.4	0.667	0.333	0.875
Nauru	NRU	2013	20		33.7188				0.2				0.329333	0.331	0.375	0.3415		0.2			-99		-99	0	1	0	0	0									0.333	0.167	0.526	0.3	0.25	0.4	0.8	0.231	0.222	0.4	0	0.333	0.75
Nepal	NPL	2013	30		67.4375				0.3				0.7215	0.532833	0.9445	0.6875		0.6			-99		-99	0	1	0	0	0.5									1	0.857	0.722	0.5	0.25	1	0.8	0.231	0.333	0.5	1	0.333	0.889
Netherlands	NLD	2013	60		49.0125				0.6	1			0.577833	0.458333	0.375	0.4375		0.8			1		1	1	1	0	0	1	1								0.5	0.5	0.667	0.7	0.5	0.6	0.6	0.667	0.5	0.4	0.25	0.333	0.75
New Caledonia	NCL	2013	20		23.5375				0.2				0.1635	0.176667	0.8125	0.05					-99		-99	1	0	0	0	0									0.333	0.143	0.105	0	0	0.4	0.4	0.077	0	0	0.25	0.333	0.625
New Zealand	NZL	2013	60		49.5125				0.6	1			0.443	0.416667	0.9445	0.4375		0.8			1		1	1	1	0	0	1	1								0.5	0.286	0.722	0.3	0.25	0.6	0.6	0.5	0.5	0.4	0.5	0	0.889
Nicaragua	NIC	2013	40		71.225				0.4				0.717333	0.6195	0.9375	0.75		0.334			-99		-99	0.5	1	0	0	0.5									1	0.571	0.833	0.6	0.5	0.8	0.8	0.667	0.5	0.667	0.75	0.333	0.875
Niger	NER	2013	40		67.0187				0.4				0.696833	0.554667	0.9445	0.6625		0.532			-99		-99	0	1	0	0	1									1	0.714	0.667	0.5	0.5	0.8	0.8	0.462	0.333	0.4	1	0.333	0.889
Nigeria	NGA	2013	40		51.6437				0.4				0.665167	0.390167	0.4445	0.521		0.666			-99		-99	0.5	1	0	0	0.5									0.667	0.857	0.667	0.3	0.5	1	0.8	0.333	0.375	0.5	0	0.333	0.889
North Macedonia	MKD	2013	60		50.4				0.6				0.643167	0.3235	0.4445	0.6875		0.8			-99		-99	1	1	0	0	1									0.667	0.714	0.778	0.4	0.5	0.8	0.6	0.385	0.556	0.4	0	0	0.889
Northern Mariana Islands	MNP	2013	20		9.275				0.2				0.0841667	0.0333333	0.3125	0.077					-99		-99	1	0	0	0	0									0	0	0.105	0	0	0.4	0.2	0	0	0	0	0	0.625
Norway	NOR	2013	60		49.5375				0.6	1			0.578	0.4305	0.4375	0.5		1			1		1	1	1	0	0	1	1								0.5	0.571	0.722	0.7	0.375	0.6	0.6	0.5	0.5	0.4	0.25	0.333	0.875
Oman	OMN	2013	50		48.3				0.5				0.584	0.389167	0.4445	0.5		0.334			-99		-99	1	1	0	0	0.5									0.333	0.75	0.778	0.5	0.143	1	0.8	0.231	0.571	0.4	0	0.333	0.889
Pakistan	PAK	2013	60		66.9875				0.6				0.6715	0.6125	0.9445	0.5625		0.6			-99		-99	1	1	0	0	1									1	0.857	0.722	0.2	0.25	1	0.8	0.417	0.625	0.5	1	0.333	0.889
Palau	PLW	2013	0		43.8625				0				0.379333	0.383	0.875	0.347		0.134			-99		-99	0	0	0	0	0									0.667	0.333	0.526	0.1	0.25	0.4	0.8	0.154	0.111	0.4	0.5	0.333	0.75
Panama	PAN	2013	60		69.8375				0.6				0.7475	0.570833	0.9445	0.6875		0.466			-99		-99	1	1	0	0	1									1	0.571	0.889	0.6	0.625	0.8	0.8	0.667	0.625	0.5	0.5	0.333	0.889
Papua New Guinea	PNG	2013	30		56.325				0.3				0.562167	0.466667	0.9445	0.475		0.134			-99		-99	0	1	0	0	0.5									1	0.667	0.556	0.3	0.25	0.6	0.8	0.25	0.25	0.667	0.5	0.333	0.889
Paraguay	PRY	2013	50		69.2938				0.5				0.723667	0.559333	0.9445	0.75		0.6			-99		-99	1	1	0	0	0.5									1	0.714	0.778	0.6	0.25	1	0.8	0.5	0.556	0.667	0.5	0.333	0.889
Peru	PER	2013	50		69.4625				0.5				0.719	0.591667	0.9375	0.6875		0.734			-99		-99	1	1	0	0	0.5									1	0.75	0.889	0.5	0.375	0.8	0.8	0.583	0.5	0.5	0.5	0.667	0.875
Philippines	PHL	2013	60		71.9188				0.6				0.704833	0.682833	0.9445	0.646		0.866			-99		-99	1	1	0	0	1									0.833	0.857	0.889	0.4	0.25	1	0.8	0.583	0.714	0.667	1	0.333	0.889
Poland	POL	2013	60		52.25				0.6	1			0.635667	0.445167	0.4375	0.5		0.866			1		1	1	1	0	0	1	1								0.667	0.625	0.722	0.7	0.5	0.6	0.6	0.5	0.571	0.667	0	0.333	0.875
Portugal	PRT	2013	60		47.8687				0.6	1			0.570333	0.4145	0.4375	0.4375		0.934			1		1	1	1	0	0	1	1								0.5	0.5	0.722	0.6	0.5	0.6	0.6	0.583	0.571	0.4	0	0.333	0.875
Puerto Rico	PRI	2013	40		20				0.4				0.151833	0.205333	0.3125	0.216					-99		-99	1	0	0	0	1									0	0	0.111	0.2	0	0.6	0.6	0.077	0.222	0	0	0.333	0.625
Qatar	QAT	2013	60		39.3937				0.6				0.396333	0.416667	0.25	0.4625		0.668			-99		-99	1	1	0	0	1									0	0	0.778	0.5	0.5	0.6	0.8	0.417	0.5	0.2	0.25	0.333	0.5
Romania	ROU	2013	60		59.0438				0.6				0.580667	0.5285	0.8335	0.5625		0.866			-99		-99	1	1	0	0	1									0.833	0.429	0.722	0.4	0.5	0.6	0.6	0.5	0.571	0.667	0.5	0.333	0.667
Russian Federation	RUS	2013	60		54.8937				0.6				0.537333	0.4195	0.8335	0.6875		0.666			-99		-99	1	1	0	0	1									0.667	0.429	0.778	0.5	0.25	0.6	0.6	0.417	0.5	0.5	0.5	0	0.667
Rwanda	RWA	2013	50		48.7812				0.5				0.581	0.3925	0.4445	0.5375		0.666			-99		-99	1	1	0	0	0.5									0.5	0.714	0.722	0.3	0.25	1	0.8	0.333	0.222	0.667	0	0.333	0.889
Samoa	WSM	2013	60		57.2188				0.6				0.591	0.466667	0.9445	0.46		0.398			-99		-99	1	1	0	0	1									1	0.429	0.667	0.4	0.25	0.8	0.8	0.417	0.25	0.5	0.5	0.333	0.889
San Marino	SMR	2013	20		15.9875				0.2				0.182167	0.0925	0.222	0.233					-99		-99	1	0	0	0	0									0	0	0.368	0.2	0.125	0.4	0.2	0.077	0.111	0.167	0	0	0.444
Sao Tome and Principe	STP	2013	20		44.3				0.2				0.504333	0.299667	0.4445	0.6875		0.2			-99		-99	0	1	0	0	0									0.5	0.429	0.722	0.4	0.375	0.6	0.8	0.154	0.111	0.4	0	0.333	0.889
Saudi Arabia	SAU	2013	40		33.7812				0.4				0.295167	0.399167	0.3125	0.307		0.534			-99		-99	1	0	0	0	1									0	0.143	0.778	0.2	0.25	0.4	0.8	0.333	0.429	0.5	0	0.333	0.625
Senegal	SEN	2013	40		61.8438				0.4				0.637	0.505167	0.9445	0.5765		0.8			-99		-99	0.5	1	0	0	0.5									1	0.75	0.722	0.3	0.25	0.8	0.8	0.231	0.5	0.5	0.667	0.333	0.889
Serbia	SRB	2013	60		63.275				0.6				0.7395	0.428833	0.9445	0.6125		0.6			-99		-99	1	1	0	0	1									1	0.875	0.833	0.5	0.429	0.8	0.6	0.417	0.556	0.5	0.5	0	0.889
Seychelles	SYC	2013	0		54.6063				0				0.565833	0.401833	0.9445	0.521		0.266			-99		-99	0	0	0	0	0									1	0.667	0.778	0.3	0.25	0.4	0.8	0.167	0.111	0.5	0.5	0.333	0.889
Sierra Leone	SLE	2013	40		59.475				0.4				0.652167	0.414833	0.9445	0.6125		0.4			-99		-99	0.5	1	0	0	0.5									1	0.571	0.667	0.3	0.375	1	0.8	0.231	0.125	0.5	0.5	0.333	0.889
Singapore	SGP	2013	60		35.8125				0.6	1			0.323167	0.402667	0.25	0.4375		0.734			1		1	1	1	0	0	1	1								0	0.167	0.722	0.2	0.25	0.6	0.8	0.333	0.5	0.2	0.25	0.333	0.5
Sint Maarten (Dutch part)	SXM	2013	20		10.0437				0.2				0.0921667	0.0795	0.25	0.0385					-99		-99	1	0	0	0	0									0	0	0.053	0.3	0	0.2	0.4	0.077	0	0	0	0	0.5
Slovak Republic	SVK	2013	60		49.7062				0.6	1			0.577333	0.433333	0.4445	0.5		0.934			1		1	1	1	0	0	1	1								0.667	0.5	0.722	0.6	0.375	0.6	0.6	0.667	0.5	0.5	0	0.333	0.889
Slovenia	SVN	2013	60		60.9813				0.6	1			0.632833	0.511833	0.9445	0.5		0.934			1		1	1	1	0	0	1	1								1	0.5	0.722	0.6	0.375	0.6	0.6	0.667	0.571	0.4	0.5	0.333	0.889
Solomon Islands	SLB	2013	30		52				0.3				0.515	0.4175	0.9375	0.425		0.266			-99		-99	0	1	0	0	0.5									1	0.429	0.611	0.4	0.25	0.4	0.8	0.25	0.222	0.4	0.5	0.333	0.875
Somalia	SOM	2013	0		31.3062				0				0.322667	0.283	0.4375	0.25		0.066			-99		-99	0	0	0	0	0									0.167	0.5	0.444	0.1	0.125	0.6	0.6	0.154	0.111	0.5	0	0.333	0.875
South Africa	ZAF	2013	50		60.2625				0.5				0.686667	0.543	0.4445	0.6875		0.8			-99		-99	0.5	1	0	0	1									0.667	1	0.778	0.3	0.375	1	0.8	0.5	0.625	0.667	0.333	0.333	0.889
South Sudan	SSD	2013	20		38.4				0.2				0.4935	0.307	0.4445	0.226		0.198			-99		-99	0	1	0	0	0									0.667	0.5	0.444	0.3	0.25	0.8	0.8	0.154	0.222	0.333	0	0.333	0.889
Spain	ESP	2013	60		58.65				0.6	1			0.605667	0.5	0.9375	0.4375		1			1		1	1	1	0	0	1	1								0.667	0.5	0.667	0.7	0.5	0.6	0.6	0.667	0.5	0.4	0.5	0.333	0.875
Sri Lanka	LKA	2013	60		67.3063				0.6				0.700833	0.529167	0.9445	0.75		0.666			-99		-99	1	1	0	0	1									0.833	1	0.722	0.4	0.25	1	0.8	0.417	0.625	0.5	0.5	0.333	0.889
St. Kitts and Nevis	KNA	2013	0		47.6313				0				0.396667	0.3735	0.875	0.625		0.066			-99		-99	0	0	0	0	0									0.667	0.167	0.421	0.4	0.125	0.6	0.8	0.083	0.125	0.4	0.5	0.333	0.75
St. Lucia	LCA	2013	40		58.125				0.4				0.521333	0.443	0.9445	0.8125		0.468			-99		-99	0	1	0	0	1									0.5	0.5	0.778	0.5	0.25	0.6	0.8	0.25	0.125	0.4	0.75	0.333	0.889
St. Martin (French part)	MAF	2013	20		4.89375				0.2				0	0.0888333	0.125	0					-99		-99	1	0	0	0	0									0	0	0	0	0	0	0.2	0	0	0	0	0.333	0.25
St. Vincent and the Grenadines	VCT	2013	20		52.4312				0.2				0.466667	0.3875	0.9445	0.6875		0.066			-99		-99	0	1	0	0	0									0.667	0.286	0.722	0.4	0.125	0.6	0.8	0.167	0.125	0.4	0.5	0.333	0.889
Sudan	SDN	2013	40		56.5				0.4				0.5885	0.470833	0.9445	0.3975		0.266			-99		-99	0	1	0	0	1									1	0.75	0.556	0.3	0.125	0.8	0.8	0.417	0.375	0.4	0.5	0.333	0.889
Suriname	SUR	2013	10		44.6187				0.1				0.494	0.3625	0.4375	0.5625		0.2			-99		-99	0	0	0	0	0.5									0.167	0.714	0.833	0.4	0.25	0.6	0.8	0.167	0.375	0.5	0	0.333	0.875
Sweden	SWE	2013	60		47.6				0.6	1			0.551833	0.402667	0.4445	0.5		0.732			1		1	1	1	0	0	1	1								0.5	0.5	0.611	0.6	0.5	0.6	0.6	0.583	0.5	0.4	0	0.333	0.889
Switzerland	CHE	2013	60		59.0187				0.6	1			0.6055	0.486833	0.9445	0.5		0.934			1		1	1	1	0	0	1	1								0.833	0.714	0.611	0.5	0.375	0.6	0.6	0.417	0.571	0.5	0.5	0.333	0.889
Syrian Arab Republic	SYR	2013	40		50.3813				0.4				0.471333	0.439833	0.9445	0.3525		0.534			-99		-99	0	1	0	0	1									0.333	0.667	0.778	0.4	0.25	0.4	0.8	0.231	0.375	0.4	0.5	0.333	0.889
Taiwan, China	TWN	2013	40						0.4												-99		-99	1	0	0	0	1
Tajikistan	TJK	2013	30		52.5688				0.3				0.603333	0.4295	0.4445	0.6625		0.6			-99		-99	0.5	1	0	0	0									0.667	0.5	0.778	0.3	0.375	1	0.8	0.333	0.444	0.667	0	0.333	0.889
Tanzania	TZA	2013	40		67.3937				0.4				0.689333	0.563833	0.9445	0.6875		0.732			-99		-99	0.5	1	0	0	0.5									1	0.875	0.611	0.4	0.25	1	0.8	0.25	0.5	0.5	1	0.333	0.889
Thailand	THA	2013	60		58.4438				0.6				0.7215	0.459667	0.4445	0.6875		0.666			-99		-99	1	1	0	0	1									0.667	1	0.833	0.6	0.429	0.8	0.8	0.5	0.625	0.5	0	0.333	0.889
Timor-Leste	TLS	2013	40		55.6812				0.4				0.562167	0.445333	0.9445	0.4875		0.666			-99		-99	0	1	0	0	1									0.667	0.714	0.667	0.4	0.125	0.8	0.8	0.417	0.222	0.4	0.5	0.333	0.889
Togo	TGO	2013	40		61.6125				0.4				0.591833	0.507167	0.9445	0.6875		0.334			-99		-99	0.5	1	0	0	0.5									0.833	0.857	0.611	0.2	0.25	0.8	0.8	0.385	0.625	0.4	0.5	0.333	0.889
Tonga	TON	2013	20		52.4813				0.2				0.481	0.401833	0.9375	0.6125		0.266			-99		-99	0	1	0	0	0									1	0.5	0.611	0.2	0.375	0.2	0.8	0.167	0.111	0.5	0.5	0.333	0.875
Trinidad and Tobago	TTO	2013	20		60.3687				0.2				0.592333	0.452667	0.9445	0.75		0.466			-99		-99	0	0	0	0	1									0.5	0.857	0.722	0.5	0.375	0.6	0.8	0.333	0.5	0.5	0.25	0.333	0.889
Tunisia	TUN	2013	50		64.425				0.5				0.704667	0.515167	0.9445	0.55		0.6			-99		-99	0.5	1	0	0	1									1	1	0.778	0.4	0.25	0.8	0.8	0.333	0.625	0.5	0.5	0.333	0.889
Turkey	TUR	2013	60		69.775				0.6				0.678667	0.598667	0.9375	0.8125		0.666			-99		-99	1	1	0	0	1									1	1	0.722	0.5	0.25	0.6	0.8	0.5	0.625	0.667	0.667	0.333	0.875
Turkmenistan	TKM	2013	0		35.0875				0				0.348167	0.331	0.4445	0.325		0.2			-99		-99	0	0	0	0	0									0.167	0.286	0.611	0.1	0.125	0.8	0.8	0.231	0.222	0.4	0	0.333	0.889
Turks and Caicos Islands	TCA	2013	20		11.6562				0.2				0.0255	0.168333	0.25	0.101					-99		-99	1	0	0	0	0									0	0	0.053	0.1	0	0	0.6	0.077	0	0	0	0.333	0.5
Tuvalu	TUV	2013	0		31.4937				0				0.327667	0.299667	0.3125	0.325		0.134			-99		-99	0	0	0	0	0									0.5	0.167	0.474	0.1	0.125	0.6	0.8	0.154	0.111	0.4	0	0.333	0.625
Uganda	UGA	2013	60		66.075				0.6				0.6865	0.554667	0.9375	0.625		0.734			-99		-99	1	1	0	0	1									1	0.833	0.611	0.3	0.375	1	0.8	0.417	0.444	0.667	0.667	0.333	0.875
Ukraine	UKR	2013	60		64.4313				0.6				0.629667	0.523667	0.9445	0.75		0.734			-99		-99	1	1	0	0	1									1	0.625	0.778	0.2	0.375	0.8	0.6	0.417	0.625	0.667	0.5	0.333	0.889
United Arab Emirates	ARE	2013	40		31.8375				0.4				0.333333	0.325	0.222	0.35		0.2			-99		-99	1	1	0	0	0									0.167	0.286	0.722	0.3	0.125	0.4	0.8	0.167	0.25	0.4	0	0.333	0.444
United Kingdom	GBR	2013	60		58.3062				0.6	1			0.558833	0.556167	0.9445	0.375		0.934			1		1	1	1	0	0	1	1								0.667	0.5	0.611	0.6	0.375	0.6	0.6	0.583	0.571	0.5	0.75	0.333	0.889
United States	USA	2013	60		47.525				0.6	1			0.526	0.408	0.4375	0.5625		1			1		1	1	1	0	0	1	1								0.5	0.714	0.667	0.3	0.375	0.6	0.6	0.615	0.5	0.4	0	0.333	0.875
Uruguay	URY	2013	60		67.5438				0.6				0.730333	0.570833	0.875	0.625		0.666			-99		-99	1	1	0	0	1									0.833	0.857	0.667	0.8	0.625	0.6	0.8	0.667	0.625	0.5	0.5	0.333	0.75
Uzbekistan	UZB	2013	10		45.2687				0.1				0.488667	0.420333	0.4445	0.45		0.2			-99		-99	0	0	0	0	0.5									0.5	0.429	0.778	0.3	0.125	0.8	0.8	0.333	0.556	0.5	0	0.333	0.889
Vanuatu	VUT	2013	30		60.05				0.3				0.630167	0.448	0.9445	0.625		0.334			-99		-99	0	1	0	0	0.5									1	0.714	0.667	0.3	0.5	0.6	0.8	0.333	0.222	0.5	0.5	0.333	0.889
Venezuela, RB	VEN	2013	40		58.5				0.4				0.5425	0.4985	0.9445	0.6125		0.466			-99		-99	0	1	0	0	1									0.667	0.571	0.667	0.5	0.25	0.6	0.8	0.333	0.625	0.4	0.5	0.333	0.889
Vietnam	VNM	2013	60		66.7062				0.6				0.7195	0.557	0.9445	0.5625		0.8			-99		-99	1	1	0	0	1									1	0.875	0.667	0.6	0.375	0.8	0.8	0.417	0.625	0.5	0.667	0.333	0.889
Virgin Islands (U.S.)	VIR	2013	20		9.3375				0.2				0.00883333	0.122167	0.25	0.104					-99		-99	1	0	0	0	0									0	0	0.053	0	0	0	0.4	0	0	0	0	0.333	0.5
West Bank and Gaza	PSE	2013	40		55.0312				0.4				0.5935	0.423167	0.9375	0.415		0.934			-99		-99	1	0	0	0	1									1	0.667	0.444	0.6	0.25	0.6	0.6	0.462	0.444	0.2	0.5	0.333	0.875
Yemen, Rep.	YEM	2013	40		59.6063				0.4				0.589	0.477333	0.9445	0.625		0.468			-99		-99	0	1	0	0	1									0.667	0.5	0.667	0.4	0.5	0.8	0.8	0.231	0.25	0.5	0.75	0.333	0.889
Zambia	ZMB	2013	50		59.7687				0.5				0.576333	0.494333	0.9445	0.625		0.8			-99		-99	0.5	1	0	0	1									1	0.833	0.5	0.2	0.125	0.8	0.8	0.333	0.333	0.5	0.667	0.333	0.889
Zimbabwe	ZWE	2013	40		49.4813				0.4				0.579333	0.4295	0.4445	0.4875		0.666			-99		-99	0	1	0	0	1									0.667	0.667	0.667	0.3	0.375	0.8	0.8	0.5	0.444	0.5	0	0.333	0.889
Afghanistan	AFG	2012	30		49.1688				0.3				0.503333	0.425833	0.5	0.646		0.4			-99		-99	0	1	0	0	0.5									0.5	0.571	0.706	0.3	0.143	0.8	0.933	0.333	0.222	0.4	0	0.667	1
Albania	ALB	2012	60		70.5312				0.6				0.779833	0.559333	1	0.625		0.6			-99		-99	1	1	0	0	1									1	0.875	0.833	0.6	0.571	0.8	0.8	0.667	0.556	0.5	0.5	0.333	1
Algeria	DZA	2012	40		53.1063				0.4				0.535667	0.5305	0.5	0.55		0.266			-99		-99	0	1	0	0	1									0.667	0.714	0.647	0.3	0.286	0.6	0.933	0.583	0.25	0.5	0.25	0.667	1
American Samoa	ASM	2012	20		21.4625				0.2				0.112	0.163833	0.8125	0.077					-99		-99	1	0	0	0	0									0.167	0	0.105	0	0	0.4	0.4	0	0	0	0.25	0.333	0.625
Andorra	AND	2012	40		23.4563				0.4				0.235	0.146167	0.375	0.358		0.4			-99		-99	1	1	0	0	0									0.167	0	0.5	0.2	0.143	0.4	0.6	0.077	0	0.2	0	0	0.75
Angola	AGO	2012	40		68.15				0.4				0.5785	0.697167	1	0.625		0.468			-99		-99	0	1	0	0	1									1	0.429	0.556	0.4	0.286	0.8	0.933	0.583	0.5	0.5	1	0.667	1
Antigua and Barbuda	ATG	2012	0		55.6				0				0.436	0.549667	0.9285	0.5625		0.2			-99		-99	0	0	0	0	0									0.5	0.167	0.706	0.5	0.143	0.6	1	0.231	0.25	0.4	0.75	0.667	0.857
Argentina	ARG	2012	40		76.4				0.4				0.7145	0.734833	1	0.764		0.732			-99		-99	0	1	0	0	1									1	0.625	0.833	0.8	0.429	0.6	0.867	0.75	0.625	0.5	1	0.667	1
Armenia	ARM	2012	60		63.6812				0.6				0.7325	0.549	0.5	0.75		0.6			-99		-99	1	1	0	0	1									0.667	0.857	1	0.5	0.571	0.8	0.933	0.583	0.444	0.667	0	0.667	1
Aruba	ABW	2012	20		18.15				0.2				0.1175	0.201667	0.25	0.2445					-99		-99	1	0	0	0	0									0	0	0.105	0.4	0	0.2	0.8	0.077	0	0	0	0.333	0.5
Australia	AUS	2012	60		64.3375				0.6	1			0.635667	0.600833	1	0.4375		1			1		1	1	1	0	0	1	1								0.833	0.571	0.824	0.7	0.286	0.6	0.8	0.667	0.571	0.4	0.5	0.667	1
Austria	AUT	2012	60		63.2125				0.6	1			0.596333	0.610167	1	0.4375		0.934			1		1	1	1	0	0	1	1								0.667	0.375	0.765	0.6	0.571	0.6	0.8	0.75	0.444	0.5	0.5	0.667	1
Azerbaijan	AZE	2012	40		60.5				0.4				0.710167	0.507333	0.5	0.6875		0.4			-99		-99	0	1	0	0	1									0.5	0.857	0.833	0.5	0.571	1	0.933	0.5	0.444	0.5	0	0.667	1
Bahamas, The	BHS	2012	60		35.5375				0.6				0.333	0.373667	0.2855	0.4375		0			-99		-99	1	1	0	0	1									0.167	0.167	0.778	0.4	0.286	0.2	1	0.25	0.125	0.2	0	0.667	0.571
Bahrain	BHR	2012	50		37.4375				0.5				0.373667	0.417	0.2855	0.3375		0.198			-99		-99	1	1	0	0	0.5									0.167	0.167	0.765	0.4	0.143	0.6	1	0.385	0.25	0.2	0	0.667	0.571
Bangladesh	BGD	2012	50		62.3438				0.5				0.722333	0.565167	0.5	0.625		0.732			-99		-99	0.5	1	0	0	1									0.667	0.857	0.824	0.7	0.286	1	0.933	0.583	0.375	0.5	0.333	0.667	1
Barbados	BRB	2012	60		62.6875				0.6				0.608	0.525	0.9285	0.6875		0.134			-99		-99	1	1	0	0	1									0.667	0.571	0.824	0.7	0.286	0.6	1	0.333	0.25	0.4	0.5	0.667	0.857
Belarus	BLR	2012	40		53.0875				0.4				0.618833	0.424833	0.4285	0.6875		0.334			-99		-99	1	1	0	0	0									0.667	0.571	0.889	0.5	0.286	0.8	0.8	0.583	0.333	0.5	0	0.333	0.857
Belgium	BEL	2012	60		53.2188				0.6	1			0.5725	0.534167	0.5	0.4375		0.734			1		1	1	1	0	0	1	1								0.5	0.5	0.706	0.7	0.429	0.6	0.8	0.667	0.571	0.5	0	0.667	1
Belize	BLZ	2012	40		63.6812				0.4				0.587	0.548667	1	0.6875		0.468			-99		-99	0	1	0	0	1									0.667	0.571	0.941	0.6	0.143	0.6	0.933	0.417	0.125	0.4	0.75	0.667	1
Benin	BEN	2012	30		55.1125				0.3				0.5745	0.541	0.4375	0.625		0.6			-99		-99	0	1	0	0	0.5									0.667	0.429	0.765	0.5	0.286	0.8	0.933	0.538	0.375	0.4	0.333	0.667	0.875
Bermuda	BMU	2012	20		17.6125				0.2				0.134167	0.185833	0.25	0.199					-99		-99	1	0	0	0	0									0	0	0.105	0.3	0	0.4	0.6	0.154	0.111	0	0.25	0	0.5
Bhutan	BTN	2012	60		69.4				0.6				0.744167	0.564833	1	0.625		0.466			-99		-99	1	1	0	0	1									1	0.857	0.722	0.6	0.286	1	0.933	0.417	0.222	0.4	0.75	0.667	1
Bolivia	BOL	2012	50		75.3438				0.5				0.7345	0.7205	1	0.6625		0.666			-99		-99	1	1	0	0	0.5									1	0.875	0.889	0.7	0.143	0.8	0.933	0.667	0.556	0.5	1	0.667	1
Bosnia and Herzegovina	BIH	2012	60		58.2062				0.6				0.6665	0.489833	0.5	0.6875		0.6			-99		-99	1	1	0	0	1									0.667	0.714	0.889	0.5	0.429	0.8	0.8	0.583	0.556	0.667	0	0.333	1
Botswana	BWA	2012	40		58.0562				0.4				0.633333	0.539833	0.5	0.625		0.668			-99		-99	0.5	1	0	0	0.5									0.667	0.625	0.722	0.7	0.286	0.8	0.933	0.583	0.556	0.5	0	0.667	1
Brazil	BRA	2012	50		79.7438				0.5				0.734833	0.829167	1	0.6875		0.466			-99		-99	1	1	0	0	0.5									0.833	0.714	0.833	0.6	0.429	1	0.933	0.75	0.625	0.667	1	1	1
British Virgin Islands	VGB	2012	20		15.2562				0.2				0.0921667	0.2035	0.25	0.0835					-99		-99	1	0	0	0	0									0	0	0.053	0.3	0	0.2	0.4	0.154	0	0	0	0.667	0.5
Brunei Darussalam	BRN	2012	50		35.8				0.5				0.3435	0.373667	0.375	0.3375		0.2			-99		-99	1	1	0	0	0.5									0.167	0.429	0.765	0.3	0	0.4	1	0.25	0.125	0.2	0	0.667	0.75
Bulgaria	BGR	2012	60		64.1875				0.6				0.613667	0.598	0.875	0.625		0.866			-99		-99	1	1	0	0	1									0.833	0.5	0.778	0.4	0.571	0.6	0.6	0.5	0.571	0.5	0.75	0.667	0.75
Burkina Faso	BFA	2012	20		68.9125				0.2				0.697167	0.578	1	0.6875		0.8			-99		-99	0	1	0	0	0									0.833	0.714	0.722	0.4	0.714	0.8	0.933	0.385	0.333	0.4	0.75	0.667	1
Burundi	BDI	2012	20		48.6562				0.2				0.5425	0.425833	0.5	0.4875		0.398			-99		-99	0	1	0	0	0									0.333	0.714	0.722	0.4	0.286	0.8	0.933	0.333	0.222	0.4	0	0.667	1
Cabo Verde	CPV	2012	30		61.8375				0.3				0.4935	0.572167	1	0.75		0.398			-99		-99	0	1	0	0	0.5									0.5	0.429	0.889	0.4	0.143	0.6	0.933	0.25	0.333	0.5	0.75	0.667	1
Cambodia	KHM	2012	40		67.9125				0.4				0.720667	0.590333	1	0.5		0.734			-99		-99	0	1	0	0	1									1	0.571	0.824	0.5	0.429	1	0.933	0.667	0.375	0.4	0.5	0.667	1
Cameroon	CMR	2012	40		63.575				0.4				0.553667	0.625	1	0.55		0.534			-99		-99	0.5	1	0	0	0.5									0.5	0.571	0.765	0.4	0.286	0.8	0.933	0.5	0.25	0.4	1	0.667	1
Canada	CAN	2012	60		51.3438				0.6	1			0.544167	0.491667	0.5	0.5		1			1		1	1	1	0	0	1	1								0.5	0.571	0.765	0.4	0.429	0.6	0.8	0.583	0.5	0.4	0	0.667	1
Cayman Islands	CYM	2012	20		16.175				0.2				0.0921667	0.201667	0.25	0.1625					-99		-99	1	0	0	0	0									0	0	0.053	0.3	0	0.2	0.8	0.077	0	0	0	0.333	0.5
Central African Republic	CAF	2012	0		47.7625				0				0.577167	0.351667	0.5	0.5345		0.2			-99		-99	0	0	0	0	0									0.5	0.667	0.667	0.4	0.429	0.8	0.933	0.333	0.111	0.4	0	0.333	1
Chad	TCD	2012	30		43.5562				0.3				0.533833	0.337833	0.5	0.3695		0.4			-99		-99	0.5	1	0	0	0									0.667	0.571	0.722	0.3	0.143	0.8	0.933	0.25	0.111	0.4	0	0.333	1
Channel Islands	CHI	2012	20						0.2												-99		-99	1	0	0	0	0
Chile	CHL	2012	60		71.5312				0.6	1			0.722833	0.643	1	0.625		0.532			1		1	1	1	0	0	1	1								1	0.875	0.833	0.4	0.429	0.8	1	0.75	0.625	0.4	0.75	0.333	1
China	CHN	2012	50		53.0562				0.5				0.568167	0.471667	0.5	0.625		0.468			-99		-99	1	1	0	0	0.5									0.667	0.75	0.706	0.2	0.286	0.8	0.933	0.231	0.5	0.5	0.333	0.333	1
Colombia	COL	2012	60		76.3688				0.6				0.7905	0.6835	1	0.6875		0.934			-99		-99	1	1	0	0	1									1	0.857	1	0.6	0.286	1	0.933	0.667	0.5	0.667	0.667	0.667	1
Comoros	COM	2012	0		56.6187				0				0.558167	0.435	1	0.55		0.266			-99		-99	0	0	0	0	0									0.5	0.5	0.778	0.4	0.571	0.6	0.933	0.333	0.111	0.4	0.5	0.333	1
Congo, Dem. Rep.	COD	2012	50		48.9312				0.5				0.5805	0.404333	0.5	0.46		0.536			-99		-99	0.5	1	0	0	1									0.667	0.667	0.706	0.5	0.143	0.8	0.933	0.385	0.375	0.4	0	0.333	1
Congo, Rep.	COG	2012	50		51.2563				0.5				0.638667	0.387333	0.5	0.5225		0.4			-99		-99	0.5	1	0	0	1									0.667	0.714	0.765	0.4	0.286	1	0.933	0.308	0.25	0.5	0	0.333	1
Costa Rica	CRI	2012	60		75.325				0.6				0.797667	0.606833	1	0.8125		0.6			-99		-99	1	1	0	0	1									1	0.857	1	0.7	0.429	0.8	0.933	0.75	0.625	0.5	0.5	0.333	1
Cote d'Ivoire	CIV	2012	50		67.5125				0.5				0.7275	0.545	1	0.5835		0.6			-99		-99	0.5	1	0	0	1									1	0.714	0.722	0.5	0.429	1	0.933	0.462	0.375	0.5	0.667	0.333	1
Croatia	HRV	2012	60		53.4625				0.6				0.625667	0.4875	0.5	0.4375		0.866			-99		-99	1	1	0	0	1									0.667	0.625	0.833	0.4	0.429	0.8	0.8	0.5	0.625	0.667	0	0.333	1
Cuba	CUB	2012	60		45.1063				0.6				0.4785	0.3985	0.5	0.4775					-99		-99	1	1	0	0	1									0.167	0.429	0.889	0.5	0.286	0.6	0.6	0.308	0.5	0.4	0.25	0.333	1
Curacao	CUW	2012	20		15.4375				0.2				0.0675	0.233	0.25	0.0835					-99		-99	1	0	0	0	0									0	0	0.105	0.1	0	0.2	0.8	0.154	0.111	0	0	0.333	0.5
Cyprus	CYP	2012	60		55.3188				0.6				0.553	0.5055	0.875	0.375		0.866			-99		-99	1	1	0	0	1									0.667	0.5	0.722	0.4	0.429	0.6	0.8	0.5	0.5	0.4	0.5	0.333	0.75
Czech Republic	CZE	2012	60		53.1437				0.6	1			0.617167	0.466667	0.5	0.5		1			1		1	1	1	0	0	1	1								0.667	0.625	0.882	0.5	0.429	0.6	0.8	0.667	0.5	0.5	0	0.333	1
Denmark	DNK	2012	60		49.3563				0.6	1			0.5915	0.436	0.4285	0.4375		0.866			1		1	1	1	0	0	1	1								0.5	0.5	0.778	0.6	0.571	0.6	0.8	0.583	0.5	0.4	0	0.333	0.857
Djibouti	DJI	2012	0		52.8687				0				0.553	0.4235	0.875	0.425		0.268			-99		-99	0	0	0	0	0									0.667	0.5	0.722	0.4	0.429	0.6	0.933	0.25	0.125	0.4	0.5	0.333	0.75
Dominica	DMA	2012	0		51.7625				0				0.44	0.398667	0.9375	0.6875		0.266			-99		-99	0	0	0	0	0									0.667	0.286	0.444	0.5	0.143	0.6	0.867	0.167	0.125	0.4	0.5	0.333	0.875
Dominican Republic	DOM	2012	60		54.9688				0.6				0.595167	0.454	0.5	0.75		0.6			-99		-99	1	1	0	0	1									0.667	0.429	0.889	0.5	0.286	0.8	0.933	0.583	0.375	0.5	0	0.333	1
Ecuador	ECU	2012	60		74.1312				0.6				0.802	0.620667	1	0.6625		0.8			-99		-99	1	1	0	0	1									1	0.857	0.941	0.5	0.714	0.8	0.933	0.583	0.625	0.5	0.75	0.333	1
Egypt, Arab Rep.	EGY	2012	60		72.1813				0.6				0.706833	0.676333	1	0.625		0.6			-99		-99	1	1	0	0	1									1	0.857	0.941	0.5	0.143	0.8	0.933	0.667	0.625	0.5	1	0.333	1
El Salvador	SLV	2012	50		73.825				0.5				0.772	0.634167	1	0.6875		0.266			-99		-99	1	1	0	0	0.5									1	0.714	0.889	0.6	0.429	1	0.933	0.538	0.5	0.667	0.5	0.667	1
Equatorial Guinea	GNQ	2012	20		53.9188				0.2				0.558667	0.420833	1	0.375		0.132			-99		-99	0	1	0	0	0									0.5	0.667	0.556	0.4	0.429	0.8	1	0.167	0.125	0.4	0.5	0.333	1
Eritrea	ERI	2012	20		41.3375				0.2				0.488333	0.334833	0.5	0.3375		0.066			-99		-99	0	1	0	0	0									0.167	0.667	0.667	0.4	0.429	0.6	0.8	0.154	0.222	0.5	0	0.333	1
Estonia	EST	2012	60		59.575				0.6	1			0.617167	0.563833	0.7855	0.4375		0.934			1		1	1	1	0	0	1	1								0.667	0.5	0.765	0.6	0.571	0.6	0.8	0.583	0.5	0.667	0.5	0.333	0.571
Eswatini	SWZ	2012	30		60.4188				0.3				0.660833	0.4295	1	0.5625		0.266			-99		-99	0.5	1	0	0	0									1	0.857	0.765	0.4	0.143	0.8	0.8	0.333	0.111	0.5	0.5	0.333	1
Ethiopia	ETH	2012	30		68.1937				0.3				0.721	0.576667	1	0.5625		1			-99		-99	0.5	1	0	0	0									1	0.875	0.765	0.4	0.286	1	0.933	0.25	0.444	0.5	1	0.333	1
Faroe Islands	FRO	2012	20		9.2375				0.2				0.066	0.0666667	0.25	0.091					-99		-99	1	0	0	0	0									0	0.143	0.053	0	0	0.2	0.4	0	0	0	0	0	0.5
Fiji	FJI	2012	50		62.35				0.5				0.6155	0.488833	1	0.675		0.4			-99		-99	0.5	1	0	0	1									1	0.429	0.778	0.4	0.286	0.8	0.933	0.417	0.25	0.5	0.5	0.333	1
Finland	FIN	2012	60		62.9312				0.6	1			0.665667	0.533333	1	0.4375		0.666			1		1	1	1	0	0	1	1								0.833	0.625	0.765	0.6	0.571	0.6	0.8	0.667	0.5	0.4	0.5	0.333	1
France	FRA	2012	60		49.1313				0.6	1			0.589333	0.45	0.5	0.3125		0.934			1		1	1	1	0	0	1	1								0.5	0.5	0.765	0.6	0.571	0.6	0.8	0.667	0.5	0.4	0	0.333	1
French Polynesia	PYF	2012	30		13.0188				0.3				0.0413333	0.168333	0.3125	0.1					-99		-99	1	0	0	0	0.5									0	0.143	0.105	0	0	0	0.6	0.077	0	0	0	0.333	0.625
Gabon	GAB	2012	20		48.5562				0.2				0.514333	0.409667	0.4375	0.675		0.198			-99		-99	0	0	0	0	1									0.333	0.571	0.611	0.2	0.571	0.8	0.933	0.417	0.375	0.4	0	0.333	0.875
Gambia, The	GMB	2012	20		60.025				0.2				0.618667	0.530833	0.9285	0.425		0.6			-99		-99	0	1	0	0	0									0.833	0.571	0.722	0.3	0.286	1	0.8	0.385	0.5	0.667	0.5	0.333	0.857
Georgia	GEO	2012	50		55.675				0.5				0.634667	0.454167	0.5	0.6875		0.666			-99		-99	1	1	0	0	0.5									0.667	0.857	0.941	0.4	0.143	0.8	0.933	0.417	0.375	0.667	0	0.333	1
Germany	DEU	2012	60		50.4312				0.6	1			0.565667	0.466667	0.5	0.4375		0.934			1		1	1	1	0	0	1	1								0.5	0.5	0.765	0.6	0.429	0.6	0.8	0.667	0.5	0.5	0	0.333	1
Ghana	GHA	2012	40		69.2625				0.4				0.7485	0.544333	1	0.6625		0.466			-99		-99	0.5	1	0	0	0.5									1	0.571	0.706	0.5	0.714	1	0.933	0.333	0.5	0.5	0.667	0.333	1
Gibraltar	GIB	2012	20		9.025				0.2				0.1	0.0851667	0.125	0.0415					-99		-99	1	0	0	0	0									0	0	0	0.2	0	0.4	0.4	0	0.111	0	0	0	0.25
Greece	GRC	2012	60		50.2938				0.6	1			0.525167	0.5035	0.5	0.4375		0.934			1		1	1	1	0	0	1	1								0.5	0.5	0.722	0.4	0.429	0.6	0.8	0.667	0.571	0.4	0.25	0.333	1
Greenland	GRL	2012	20		10.6125				0.2				0.0841667	0.0795	0.3125	0.0455					-99		-99	1	0	0	0	0									0	0	0.105	0	0	0.4	0.4	0.077	0	0	0	0	0.625
Grenada	GRD	2012	0		55.1313				0				0.509	0.398667	1	0.6875		0.2			-99		-99	0	0	0	0	0									0.667	0.333	0.611	0.5	0.143	0.8	0.867	0.167	0.125	0.4	0.5	0.333	1
Guam	GUM	2012	40		13.1562				0.4				0.0841667	0.1555	0.25	0.0835					-99		-99	1	0	0	0	1									0	0	0.105	0	0	0.4	0.6	0	0	0	0	0.333	0.5
Guatemala	GTM	2012	40		66.175				0.4				0.616667	0.599333	1	0.646		0.534			-99		-99	0	1	0	0	1									0.667	0.714	0.833	0.4	0.286	0.8	0.933	0.538	0.625	0.5	0.667	0.333	1
Guinea	GIN	2012	40		44.0312				0.4				0.534833	0.340167	0.5	0.3975		0.334			-99		-99	1	1	0	0	0									0.667	0.5	0.556	0.4	0.286	0.8	0.933	0.25	0.125	0.4	0	0.333	1
Guinea-Bissau	GNB	2012	20		41.275				0.2				0.5035	0.321833	0.4285	0.3975		0.334			-99		-99	0	1	0	0	0									0.5	0.667	0.611	0.3	0.143	0.8	0.933	0.154	0.111	0.4	0	0.333	0.857
Guyana	GUY	2012	20		61.775				0.2				0.625167	0.509667	0.875	0.6625		0.2			-99		-99	0	1	0	0	0									0.667	0.857	0.941	0.4	0.286	0.6	0.933	0.167	0.125	0.5	1	0.333	0.75
Haiti	HTI	2012	50		48.25				0.5				0.541	0.4465	0.5	0.3975		0.2			-99		-99	1	1	0	0	0.5									0.667	0.571	0.722	0.2	0.286	0.8	0.933	0.538	0.375	0.5	0	0.333	1
Honduras	HND	2012	50		73.7625				0.5				0.783667	0.593	1	0.771		0.8			-99		-99	1	1	0	0	0.5									0.833	0.571	0.941	0.5	0.857	1	0.933	0.667	0.375	0.5	0.75	0.333	1
Hong Kong SAR, China	HKG	2012	40		25.3813				0.4				0.219167	0.2375	0.2855	0.375					-99		-99	1	0	0	0	1									0.167	0.143	0.105	0.5	0	0.4	0.6	0.25	0.375	0.2	0	0	0.571
Hungary	HUN	2012	60		48.2437				0.6	1			0.572667	0.422167	0.375	0.5		0.934			1		1	1	1	0	0	1	1								0.5	0.5	0.765	0.5	0.571	0.6	0.8	0.5	0.5	0.4	0	0.333	0.75
Iceland	ISL	2012	40		47.8875				0.4	1			0.472833	0.491667	0.5	0.4375		0.6			1		1	1	0	0	0	1	1								0.5	0.429	0.722	0.3	0.286	0.6	0.8	0.583	0.5	0.4	0	0.667	1
India	IND	2012	50		58.8062				0.5				0.607167	0.565167	0.5	0.6875		0.934			-99		-99	1	1	0	0	0.5									0.667	0.625	0.765	0.3	0.286	1	0.933	0.667	0.625	0.5	0.333	0.333	1
Indonesia	IDN	2012	60		71.1937				0.6				0.6735	0.6625	1	0.6875		0.8			-99		-99	1	1	0	0	1									0.833	0.857	0.765	0.5	0.286	0.8	0.933	0.417	0.625	0.667	1	0.333	1
Iran, Islamic Rep.	IRN	2012	50		66.725				0.5				0.759833	0.523667	1	0.4875		0.4			-99		-99	0.5	1	0	0	1									0.833	0.714	0.941	0.5	0.571	1	0.867	0.417	0.625	0.4	0.5	0.333	1
Iraq	IRQ	2012	40		63.2625				0.4				0.621833	0.587833	1	0.432		0.4			-99		-99	0.5	1	0	0	0.5									0.833	0.571	0.941	0.3	0.286	0.8	0.933	0.417	0.444	0.4	1	0.333	1
Ireland	IRL	2012	60		47.875				0.6	1			0.549	0.436	0.5	0.375		0.866			1		1	1	1	0	0	1	1								0.5	0.5	0.765	0.5	0.429	0.6	0.8	0.583	0.5	0.4	0	0.333	1
Isle of Man	IMN	2012	20		8.18125				0.2				0.0611667	0.0945	0.125	0.0625					-99		-99	1	0	0	0	0									0.167	0	0	0	0	0.2	0.4	0	0	0.167	0	0	0.25
Israel	ISR	2012	60		40.3125				0.6	1			0.464333	0.366667	0.357	0.375		0.466			1		1	1	1	0	0	1	1								0.333	0.5	0.667	0.4	0.286	0.6	0.8	0.5	0.5	0.4	0	0	0.714
Italy	ITA	2012	60		61.2875				0.6	1			0.61	0.545167	1	0.4375		0.934			1		1	1	1	0	0	1	1								0.667	0.5	0.722	0.6	0.571	0.6	0.8	0.667	0.571	0.4	0.5	0.333	1
Jamaica	JAM	2012	40		64.9875				0.4				0.619167	0.509667	1	0.8125		0.6			-99		-99	0	1	0	0	1									0.833	0.714	0.882	0.4	0.286	0.6	0.933	0.417	0.375	0.5	0.5	0.333	1
Japan	JPN	2012	60		58.375				0.6	1			0.572	0.5055	1	0.4375		0.666			1		1	1	1	0	0	1	1								0.667	0.571	0.765	0.4	0.429	0.6	0.8	0.5	0.5	0.4	0.5	0.333	1
Jordan	JOR	2012	60		69.2812				0.6				0.768333	0.5375	1	0.625		0.6			-99		-99	1	1	0	0	1									1	0.857	0.824	0.5	0.429	1	0.933	0.417	0.375	0.5	0.667	0.333	1
Kazakhstan	KAZ	2012	60		71.1188				0.6				0.738667	0.595333	1	0.6875		0.6			-99		-99	1	1	0	0	1									1	0.714	0.889	0.4	0.429	1	0.933	0.583	0.556	0.667	0.5	0.333	1
Kenya	KEN	2012	20		63.0063				0.2				0.594167	0.586	1	0.5		0.534			-99		-99	0	1	0	0	0									0.5	0.875	0.647	0.4	0.143	1	0.933	0.25	0.5	0.5	1	0.333	1
Kiribati	KIR	2012	20		39.9625				0.2				0.434333	0.321833	0.4285	0.5		0.2			-99		-99	0	1	0	0	0									0.167	0.286	0.882	0.3	0.571	0.4	0.933	0.154	0.111	0.4	0	0.333	0.857
Korea, Dem. People’s Rep.	PRK	2012	20		37.5187				0.2				0.3965	0.329333	0.5	0.324					-99		-99	1	0	0	0	0									0	0.571	0.765	0.1	0.143	0.8	0.867	0.154	0.222	0.4	0	0.333	1
Korea, Rep.	KOR	2012	60		63.2062				0.6	1			0.642333	0.564	1	0.4375		1			1		1	1	1	0	0	1	1								0.833	0.714	0.778	0.5	0.429	0.6	0.8	0.417	0.5	0.5	0.5	0.667	1
Kosovo	XKX	2012	20						0.2									0.4			-99		-99	1	0	0	0	0
Kuwait	KWT	2012	50		52.55				0.5				0.468667	0.525	0.7855	0.4375		0.598			-99		-99	1	1	0	0	0.5									0.333	0.571	0.765	0.4	0.143	0.6	1	0.167	0.5	0.4	0.75	0.333	0.571
Kyrgyz Republic	KGZ	2012	60		71.7812				0.6				0.775	0.576667	1	0.6875		0.4			-99		-99	1	1	0	0	1									0.833	0.714	0.889	0.5	0.714	1	0.933	0.5	0.444	0.5	0.75	0.333	1
Lao PDR	LAO	2012	60		65.1063				0.6				0.732333	0.462167	1	0.625		0.6			-99		-99	1	1	0	0	1									1	0.5	0.765	0.7	0.429	1	0.933	0.385	0.222	0.4	0.5	0.333	1
Latvia	LVA	2012	60		47.0187				0.6	1			0.532333	0.4805	0.2855	0.4375		1			1		1	1	1	0	0	1	1								0.5	0.5	0.765	0.4	0.429	0.6	0.8	0.583	0.5	0.667	0	0.333	0.571
Lebanon	LBN	2012	20		59.4625				0.2				0.581667	0.4415	1	0.6875		0.468			-99		-99	0	1	0	0	0									0.833	0.571	0.5	0.3	0.286	1	0.733	0.333	0.25	0.5	0.5	0.333	1
Lesotho	LSO	2012	20		52.1625				0.2				0.592167	0.423833	0.5	0.625		0.668			-99		-99	0	1	0	0	0									0.5	0.857	0.667	0.3	0.429	0.8	0.933	0.333	0.444	0.5	0	0.333	1
Liberia	LBR	2012	40		48.5812				0.4				0.494333	0.472	0.5	0.4875		0.4			-99		-99	0	1	0	0	1									0.167	0.714	0.556	0.3	0.429	0.8	0.933	0.583	0.25	0.4	0.333	0.333	1
Libya	LBY	2012	40		32.7				0.4				0.3165	0.3055	0.5	0.25		0.2			-99		-99	0	1	0	0	1									0.167	0.333	0.556	0.1	0.143	0.6	0.6	0.25	0.25	0.4	0	0.333	1
Liechtenstein	LIE	2012	20		20.8188				0.2				0.177167	0.1905	0.375	0.1875					-99		-99	1	0	0	0	0									0.167	0	0.053	0.3	0.143	0.4	0.4	0.077	0	0.333	0	0.333	0.75
Lithuania	LTU	2012	60		46.75				0.6	1			0.525167	0.4805	0.2855	0.4375		0.734			1		1	1	1	0	0	1	1								0.5	0.5	0.722	0.4	0.429	0.6	0.8	0.583	0.5	0.667	0	0.333	0.571
Luxembourg	LUX	2012	40		44.5125				0.4	1			0.4895	0.426667	0.4375	0.375		0.666			1		1	1	0	0	0	1	1								0.5	0.286	0.722	0.4	0.429	0.6	0.8	0.583	0.444	0.4	0	0.333	0.875
Macao SAR, China	MAC	2012	40		19.3188				0.4				0.141333	0.198167	0.2145	0.3125					-99		-99	1	0	0	0	1									0	0.143	0.105	0.4	0	0.2	0.6	0.167	0.222	0.2	0	0	0.429
Madagascar	MDG	2012	60		66.1437				0.6				0.684667	0.558333	1	0.5625		0.466			-99		-99	1	1	0	0	1									1	0.857	0.722	0.3	0.429	0.8	0.933	0.417	0.5	0.5	0.667	0.333	1
Malawi	MWI	2012	30		62.7062				0.3				0.671333	0.484167	1	0.55		0.734			-99		-99	0.5	1	0	0	0									1	0.875	0.667	0.4	0.286	0.8	0.933	0.25	0.222	0.5	0.667	0.333	1
Malaysia	MYS	2012	60		66.3125				0.6				0.690667	0.556833	1	0.5625		0.534			-99		-99	1	1	0	0	1									1	0.625	0.833	0.6	0.286	0.8	0.8	0.583	0.625	0.5	0.5	0.333	1
Maldives	MDV	2012	20		56.7687				0.2				0.612667	0.429167	0.9285	0.4875		0.332			-99		-99	0	1	0	0	0									0.833	0.667	0.833	0.4	0.143	0.8	0.8	0.167	0.125	0.4	0.75	0.333	0.857
Mali	MLI	2012	50		64.8438				0.5				0.649833	0.5585	0.9375	0.625		0.868			-99		-99	0.5	1	0	0	1									1	0.857	0.556	0.4	0.286	0.8	0.8	0.385	0.333	0.5	1	0.333	0.875
Malta	MLT	2012	40		42.1875				0.4				0.4855	0.419333	0.2855	0.375		0.866			-99		-99	1	0	0	0	1									0.333	0.429	0.722	0.4	0.429	0.6	0.6	0.583	0.5	0.5	0	0.333	0.571
Marshall Islands	MHL	2012	20		44.3125				0.2				0.352833	0.403667	0.9285	0.347		0.2			-99		-99	0	1	0	0	0									0.667	0.333	0.474	0.1	0.143	0.4	0.8	0.167	0.222	0.4	0.5	0.333	0.857
Mauritania	MRT	2012	50		45.6812				0.5				0.565167	0.3405	0.5	0.4375		0.4			-99		-99	0.5	1	0	0	1									0.667	0.714	0.667	0.4	0.143	0.8	0.8	0.385	0.125	0.4	0	0.333	1
Mauritius	MUS	2012	50		70.4562				0.5				0.644	0.6515	1	0.75		0.666			-99		-99	0.5	1	0	0	1									1	0.5	0.778	0.7	0.286	0.6	0.8	0.667	0.625	0.4	0.75	0.667	1
Mexico	MEX	2012	60		74.6312				0.6				0.738667	0.668167	1	0.75		0.6			-99		-99	1	1	0	0	1									1	0.857	0.889	0.6	0.286	0.8	0.8	0.667	0.625	0.5	0.75	0.667	1
Micronesia, Fed. Sts.	FSM	2012	0		41.1875				0				0.283167	0.3435	1	0.415		0.134			-99		-99	0	0	0	0	0									0.333	0.167	0.556	0.1	0.143	0.4	0.8	0.167	0.111	0.4	0.25	0.333	1
Moldova	MDA	2012	60		54.8563				0.6				0.700667	0.3455	0.5	0.75		0.668			-99		-99	1	1	0	0	1									0.667	0.833	0.833	0.5	0.571	0.8	0.6	0.417	0.556	0.5	0	0	1
Monaco	MCO	2012	40		13.1687				0.4				0.143167	0.074	0.2145	0.1875					-99		-99	1	1	0	0	0									0	0	0.316	0	0.143	0.4	0.2	0.077	0	0.167	0	0	0.429
Mongolia	MNG	2012	60		69.4625				0.6				0.772833	0.496167	1	0.75		0.6			-99		-99	1	1	0	0	1									1	0.875	0.833	0.5	0.429	1	0.8	0.5	0.444	0.4	0.5	0.333	1
Montenegro	MNE	2012	60		59.1875				0.6				0.614833	0.426	1	0.6125		0.534			-99		-99	1	1	0	0	1									1	0.625	0.778	0.4	0.286	0.6	0.6	0.5	0.556	0.4	0.5	0	1
Morocco	MAR	2012	40		67.4062				0.4				0.7475	0.529167	1	0.5625		0.8			-99		-99	0	1	0	0	1									0.667	1	0.889	0.5	0.429	1	0.8	0.25	0.625	0.5	0.667	0.333	1
Mozambique	MOZ	2012	30		62.9875				0.3				0.633833	0.55	1	0.4875		0.734			-99		-99	0.5	1	0	0	0									1	0.75	0.667	0.3	0.286	0.8	0.8	0.167	0.5	0.5	1	0.333	1
Myanmar	MMR	2012	20		57.5187				0.2				0.607333	0.419	1	0.5225		0.4			-99		-99	0	1	0	0	0									0.833	0.857	0.611	0.4	0.143	0.8	0.8	0.231	0.25	0.4	0.5	0.333	1
Namibia	NAM	2012	50		58.775				0.5				0.541	0.5055	1	0.5625		0.534			-99		-99	0.5	1	0	0	1									0.833	0.571	0.556	0.4	0.286	0.6	0.8	0.333	0.5	0.4	0.667	0.333	1
Nauru	NRU	2012	20		31.7625				0.2				0.3115	0.299667	0.4285	0.279		0.134			-99		-99	0	1	0	0	0									0.333	0.167	0.526	0.3	0.143	0.4	0.8	0.154	0.111	0.4	0	0.333	0.857
Nepal	NPL	2012	20		70.8375				0.2				0.768	0.5585	1	0.6875		0.6			-99		-99	0	1	0	0	0									1	0.857	0.722	0.6	0.429	1	0.8	0.385	0.333	0.5	1	0.333	1
Netherlands	NLD	2012	60		49.5				0.6	1			0.573	0.458333	0.4285	0.4375		0.8			1		1	1	1	0	0	1	1								0.5	0.5	0.667	0.6	0.571	0.6	0.6	0.667	0.5	0.4	0.25	0.333	0.857
New Caledonia	NCL	2012	20		23.5375				0.2				0.1635	0.176667	0.8125	0.05					-99		-99	1	0	0	0	0									0.333	0.143	0.105	0	0	0.4	0.4	0.077	0	0	0.25	0.333	0.625
New Zealand	NZL	2012	60		50.7				0.6	1			0.456167	0.416667	1	0.4375		0.8			1		1	1	1	0	0	1	1								0.5	0.286	0.722	0.2	0.429	0.6	0.6	0.5	0.5	0.4	0.5	0	1
Nicaragua	NIC	2012	40		71.825				0.4				0.7125	0.6195	1	0.75		0.334			-99		-99	0.5	1	0	0	0.5									1	0.571	0.833	0.5	0.571	0.8	0.8	0.667	0.5	0.667	0.75	0.333	1
Niger	NER	2012	40		67.5312				0.4				0.692	0.554667	1	0.6625		0.532			-99		-99	0	1	0	0	1									1	0.714	0.667	0.4	0.571	0.8	0.8	0.462	0.333	0.4	1	0.333	1
Nigeria	NGA	2012	40		51.375				0.4				0.653333	0.376333	0.5	0.521		0.6			-99		-99	0.5	1	0	0	0.5									0.667	0.857	0.667	0.3	0.429	1	0.8	0.25	0.375	0.5	0	0.333	1
North Macedonia	MKD	2012	60		51.5375				0.6				0.655	0.3235	0.5	0.6875		0.734			-99		-99	1	1	0	0	1									0.667	0.714	0.778	0.4	0.571	0.8	0.6	0.385	0.556	0.4	0	0	1
Northern Mariana Islands	MNP	2012	20		9.275				0.2				0.0841667	0.0333333	0.3125	0.077					-99		-99	1	0	0	0	0									0	0	0.105	0	0	0.4	0.2	0	0	0	0	0	0.625
Norway	NOR	2012	60		50.0312				0.6	1			0.570333	0.4305	0.5	0.5		1			1		1	1	1	0	0	1	1								0.5	0.571	0.722	0.6	0.429	0.6	0.6	0.5	0.5	0.4	0.25	0.333	1
Oman	OMN	2012	40		51.7938				0.4				0.634833	0.413	0.5	0.5		0.334			-99		-99	1	1	0	0	0									0.333	0.714	0.833	0.5	0.429	1	0.8	0.231	0.714	0.4	0	0.333	1
Pakistan	PAK	2012	60		67.675				0.6				0.692167	0.6125	1	0.5		0.6			-99		-99	1	1	0	0	1									1	1	0.667	0.2	0.286	1	0.8	0.417	0.625	0.5	1	0.333	1
Palau	PLW	2012	0		43.8625				0				0.3615	0.383	0.9285	0.347		0.134			-99		-99	0	0	0	0	0									0.667	0.333	0.526	0.1	0.143	0.4	0.8	0.154	0.111	0.4	0.5	0.333	0.857
Panama	PAN	2012	60		68.6625				0.6				0.760167	0.570833	1	0.5		0.4			-99		-99	1	1	0	0	1									1	0.857	0.833	0.5	0.571	0.8	0.8	0.667	0.625	0.5	0.5	0.333	1
Papua New Guinea	PNG	2012	10		57.2437				0.1				0.568167	0.466667	1	0.475		0.134			-99		-99	0	0	0	0	0.5									1	0.667	0.556	0.3	0.286	0.6	0.8	0.25	0.25	0.667	0.5	0.333	1
Paraguay	PRY	2012	50		70.9375				0.5				0.755333	0.553	1	0.75		0.6			-99		-99	1	1	0	0	0.5									1	0.714	0.889	0.5	0.429	1	0.8	0.462	0.556	0.667	0.5	0.333	1
Peru	PER	2012	50		68.4938				0.5				0.728	0.536	1	0.6875		0.734			-99		-99	1	1	0	0	0.5									1	0.75	0.889	0.5	0.429	0.8	0.8	0.583	0.5	0.5	0.5	0.333	1
Philippines	PHL	2012	60		69.575				0.6				0.6665	0.640167	1	0.646		0.866			-99		-99	1	1	0	0	1									0.667	0.857	0.889	0.3	0.286	1	0.8	0.583	0.625	0.5	1	0.333	1
Poland	POL	2012	60		48.1688				0.6	1			0.579333	0.4195	0.357	0.5		0.8			1		1	1	1	0	0	1	1								0.5	0.625	0.722	0.6	0.429	0.6	0.6	0.417	0.5	0.667	0	0.333	0.714
Portugal	PRT	2012	60		46.7938				0.6	1			0.532667	0.402667	0.5	0.4375		0.934			1		1	1	1	0	0	1	1								0.5	0.5	0.667	0.5	0.429	0.6	0.6	0.583	0.5	0.4	0	0.333	1
Puerto Rico	PRI	2012	40		19.3062				0.4				0.151833	0.186833	0.3125	0.216					-99		-99	1	0	0	0	1									0	0	0.111	0.2	0	0.6	0.6	0.077	0.111	0	0	0.333	0.625
Qatar	QAT	2012	60		38.8687				0.6				0.3845	0.402667	0.2855	0.4625		0.668			-99		-99	1	1	0	0	1									0	0	0.778	0.5	0.429	0.6	0.8	0.333	0.5	0.2	0.25	0.333	0.571
Romania	ROU	2012	60		60.0063				0.6				0.5925	0.5285	0.875	0.5625		0.8			-99		-99	1	1	0	0	1									0.833	0.429	0.722	0.4	0.571	0.6	0.6	0.5	0.571	0.667	0.5	0.333	0.75
Russian Federation	RUS	2012	60		55.6375				0.6				0.543333	0.4195	0.875	0.6875		0.734			-99		-99	1	1	0	0	1									0.667	0.429	0.778	0.5	0.286	0.6	0.6	0.417	0.5	0.5	0.5	0	0.75
Rwanda	RWA	2012	40		49.1812				0.4				0.587	0.378667	0.5	0.5375		0.6			-99		-99	0.5	1	0	0	0.5									0.5	0.714	0.722	0.3	0.286	1	0.8	0.25	0.222	0.667	0	0.333	1
Samoa	WSM	2012	50		58.1375				0.5				0.597	0.466667	1	0.46		0.332			-99		-99	0.5	1	0	0	1									1	0.429	0.667	0.4	0.286	0.8	0.8	0.417	0.25	0.5	0.5	0.333	1
San Marino	SMR	2012	20		16.45				0.2				0.185167	0.0925	0.25	0.233					-99		-99	1	0	0	0	0									0	0	0.368	0.2	0.143	0.4	0.2	0.077	0.111	0.167	0	0	0.5
Sao Tome and Principe	STP	2012	20		46.0562				0.2				0.532667	0.299667	0.5	0.6875		0.2			-99		-99	0	1	0	0	0									0.5	0.714	0.611	0.2	0.571	0.6	0.8	0.154	0.111	0.4	0	0.333	1
Saudi Arabia	SAU	2012	40		33.825				0.4				0.301167	0.3735	0.357	0.325		0.466			-99		-99	1	0	0	0	1									0	0.143	0.778	0.2	0.286	0.4	0.8	0.333	0.375	0.4	0	0.333	0.714
Senegal	SEN	2012	40		61.65				0.4				0.643	0.505167	1	0.4875		0.734			-99		-99	0.5	1	0	0	0.5									1	0.75	0.722	0.3	0.286	0.8	0.8	0.231	0.5	0.5	0.667	0.333	1
Serbia	SRB	2012	60		64.2812				0.6				0.722833	0.428833	1	0.6875		0.6			-99		-99	1	1	0	0	1									1	0.875	0.833	0.4	0.429	0.8	0.6	0.417	0.556	0.5	0.5	0	1
Seychelles	SYC	2012	0		53.4438				0				0.516333	0.401833	1	0.521		0.2			-99		-99	0	0	0	0	0									0.667	0.667	0.778	0.3	0.286	0.4	0.8	0.167	0.111	0.5	0.5	0.333	1
Sierra Leone	SLE	2012	40		58.0562				0.4				0.6135	0.418	1	0.55		0.4			-99		-99	0.5	1	0	0	0.5									1	0.571	0.667	0.3	0.143	1	0.8	0.25	0.125	0.5	0.5	0.333	1
Singapore	SGP	2012	60		36.4813				0.6	1			0.329167	0.402667	0.2855	0.4375		0.8			1		1	1	1	0	0	1	1								0	0.167	0.722	0.2	0.286	0.6	0.8	0.333	0.5	0.2	0.25	0.333	0.571
Sint Maarten (Dutch part)	SXM	2012	20		10.0437				0.2				0.0921667	0.0795	0.25	0.0385					-99		-99	1	0	0	0	0									0	0	0.053	0.3	0	0.2	0.4	0.077	0	0	0	0	0.5
Slovak Republic	SVK	2012	60		47.7625				0.6	1			0.562667	0.419333	0.375	0.5		0.934			1		1	1	1	0	0	1	1								0.5	0.625	0.722	0.5	0.429	0.6	0.6	0.583	0.5	0.5	0	0.333	0.75
Slovenia	SVN	2012	60		61.3875				0.6	1			0.625167	0.511833	1	0.5		0.934			1		1	1	1	0	0	1	1								1	0.5	0.722	0.5	0.429	0.6	0.6	0.667	0.571	0.4	0.5	0.333	1
Solomon Islands	SLB	2012	20		48.4625				0.2				0.432167	0.385167	1	0.425		0.2			-99		-99	0	1	0	0	0									0.667	0.429	0.611	0.2	0.286	0.4	0.8	0.167	0.111	0.4	0.5	0.333	1
Somalia	SOM	2012	0		30.8125				0				0.288667	0.283	0.5	0.25		0.066			-99		-99	0	0	0	0	0									0	0.5	0.389	0.1	0.143	0.6	0.6	0.154	0.111	0.5	0	0.333	1
South Africa	ZAF	2012	50		59.5562				0.5				0.704833	0.4875	0.5	0.6875		0.8			-99		-99	0.5	1	0	0	1									0.667	1	0.833	0.3	0.429	1	0.8	0.5	0.625	0.667	0	0.333	1
South Sudan	SSD	2012	20		39.6688				0.2				0.508833	0.307	0.5	0.226		0.198			-99		-99	0	1	0	0	0									0.667	0.5	0.5	0.3	0.286	0.8	0.8	0.154	0.222	0.333	0	0.333	1
Spain	ESP	2012	60		58.625				0.6	1			0.584167	0.5	1	0.4375		1			1		1	1	1	0	0	1	1								0.667	0.5	0.667	0.5	0.571	0.6	0.6	0.667	0.5	0.4	0.5	0.333	1
Sri Lanka	LKA	2012	60		69.0938				0.6				0.716167	0.543	1	0.75		0.734			-99		-99	1	1	0	0	1									0.833	1	0.778	0.4	0.286	1	0.8	0.5	0.625	0.5	0.5	0.333	1
St. Kitts and Nevis	KNA	2012	0		48.4125				0				0.399667	0.3735	0.9285	0.625		0.066			-99		-99	0	0	0	0	0									0.667	0.167	0.421	0.4	0.143	0.6	0.8	0.083	0.125	0.4	0.5	0.333	0.857
St. Lucia	LCA	2012	40		59.0438				0.4				0.527333	0.443	1	0.8125		0.468			-99		-99	0	1	0	0	1									0.5	0.5	0.778	0.5	0.286	0.6	0.8	0.25	0.125	0.4	0.75	0.333	1
St. Martin (French part)	MAF	2012	20		4.89375				0.2				0	0.0888333	0.125	0					-99		-99	1	0	0	0	0									0	0	0	0	0	0	0.2	0	0	0	0	0.333	0.25
St. Vincent and the Grenadines	VCT	2012	20		53.0125				0.2				0.453	0.398167	1	0.6875		0.066			-99		-99	0	1	0	0	0									0.667	0.286	0.722	0.3	0.143	0.6	0.8	0.231	0.125	0.4	0.5	0.333	1
Sudan	SDN	2012	40		57.025				0.4				0.5915	0.470833	1	0.375		0.266			-99		-99	0	1	0	0	1									1	0.75	0.556	0.3	0.143	0.8	0.8	0.417	0.375	0.4	0.5	0.333	1
Suriname	SUR	2012	10		44.7313				0.1				0.476167	0.341667	0.5	0.625		0.2			-99		-99	0	0	0	0	0.5									0.167	0.714	0.833	0.4	0.143	0.6	0.8	0.167	0.25	0.5	0	0.333	1
Sweden	SWE	2012	60		48.5562				0.6	1			0.547	0.4145	0.5	0.5		0.666			1		1	1	1	0	0	1	1								0.5	0.5	0.611	0.5	0.571	0.6	0.6	0.583	0.571	0.4	0	0.333	1
Switzerland	CHE	2012	60		60.05				0.6	1			0.6145	0.486833	1	0.5		1			1		1	1	1	0	0	1	1								0.833	0.714	0.611	0.5	0.429	0.6	0.6	0.417	0.571	0.5	0.5	0.333	1
[truncated: 1,773 more rows]
[truncated: 28 more columns]
